# Supplementary material for: In situ Ti isotopic analysis by femtosecond laser ablation MC-ICP-MS
Source: Royal Society of Chemistry journal article supplement (doi:10.1039/d2ja00189f), 2022-01-01
Supplement: d2ja00189f1.xlsx [file d2ja00189f1.xlsx]

## Sheet: PZH12-18 ilmenite
Time	Grain	Sample	44Ca	46Ti	47Ti	48Ti	49Ti	50Ti	49Ti/47Ti	se	46Ti/47Ti	se	48Ti/47Ti	se	δ49/47Ti	δ46/47Ti	δ48/47Ti	To OL-Ti		-0.35
																		δ49/47Ti
2022-02-23	Grian 1	PZH12-15_01	3.11417e-08	3.27254	3.08192	31.9169	2.44344	2.44812	0.79283	1.36702e-05	1.06185	1.71908e-05	10.3562	0.000139727
	Same grain	PZH12-18_01	1.62673e-05	3.3227	3.12912	32.4038	2.48071	2.48515	0.79278	1.37421e-05	1.06186	1.59301e-05	10.3556	0.000126541	-0.0561838	-0.00765002	-0.045057	-0.406164
	Grian 1	PZH12-15_02	1.67636e-05	3.24431	3.05522	31.6396	2.42223	2.42667	0.79282	1.59965e-05	1.06189	1.68764e-05	10.3559	0.000141008
	Same grain	PZH12-18_02	1.37858e-06	3.26485	3.07437	31.8364	2.4371	2.44143	0.792715	1.42369e-05	1.06196	1.86306e-05	10.3554	0.000136249	-0.0549351	0.0481276	-0.00866249	-0.404916
	Grian 1	PZH12-15_03	6.06639e-06	3.18682	3.001	31.0756	2.37888	2.38317	0.792697	1.66648e-05	1.06192	1.84839e-05	10.3551	0.000147551
	Same grain	PZH12-18_03	1.74202e-06	3.2418	3.05263	31.6099	2.41972	2.42383	0.792669	1.34995e-05	1.06197	1.77434e-05	10.355	0.000150939	-0.0178892	0.033239	0.00627242	-0.367883
	Grian 1	PZH12-15_04	3.09705e-05	3.18304	2.99736	31.0368	2.37592	2.38009	0.79267	1.38414e-05	1.06195	1.82065e-05	10.3547	0.000140396
	Same grain	PZH12-18_04	2.98962e-07	3.22112	3.03305	31.4066	2.40407	2.4081	0.792627	1.66586e-05	1.06201	1.76772e-05	10.3548	0.000146951	-0.0072879	0.0347809	0.0158597	-0.357285
	Grian 1	PZH12-15_05	3.71148e-06	3.19593	3.00935	31.1607	2.3852	2.38926	0.792595	1.31241e-05	1.062	1.6629e-05	10.3546	0.000131287
	Same grain	PZH12-18_05	-7.06728e-06	3.14202	2.95857	30.6344	2.34491	2.34887	0.792585	1.54439e-05	1.062	1.8434e-05	10.3545	0.000131563	-0.0346897	0.0200324	-0.0144319	-0.384678
	Grian 1	PZH12-15_06	4.28695e-07	3.19654	3.01001	31.1675	2.38582	2.38981	0.79263	1.40564e-05	1.06197	1.82657e-05	10.3546	0.000124335
	Same grain	PZH12-18_06	3.18424e-06	3.13061	2.94775	30.5222	2.33633	2.34016	0.792582	1.36063e-05	1.06203	1.79822e-05	10.3544	0.000137073	-0.0195709	0.0372145	-0.00578941	-0.369564
	Grian 1	PZH12-15_07	1.48925e-05	3.18243	2.99659	31.0277	2.37499	2.3788	0.792565	1.68323e-05	1.06202	2.01556e-05	10.3544	0.000154888
	Same grain	PZH12-18_07	1.60852e-05	3.18603	2.99983	31.0611	2.3775	2.38126	0.792545	1.72851e-05	1.06207	1.91839e-05	10.3543	0.000147098	-0.00864066	0.0552712	0.015971	-0.358638
	Grian 1	PZH12-15_08	6.88545e-06	3.16196	2.97735	30.8272	2.35966	2.36341	0.792538	1.34418e-05	1.062	1.87142e-05	10.3539	0.000139993
	Same grain	PZH12-18_08	6.11115e-06	3.1579	2.9733	30.7848	2.35623	2.3599	0.792463	1.57297e-05	1.06209	1.97149e-05	10.3538	0.000156844	-0.0723291	0.0547903	-0.00325925	-0.422304
	Grian 1	PZH12-15_09	-1.01347e-05	3.10599	2.92452	30.2795	2.31768	2.32125	0.792503	1.53887e-05	1.06205	1.7827e-05	10.3537	0.00014143
	Same grain	PZH12-18_09	-2.13837e-05	3.09742	2.91627	30.1935	2.31089	2.31436	0.792415	1.58123e-05	1.06212	1.85183e-05	10.3535	0.000160904	-0.0680233	0.0565973	0.00321485	-0.417999
	Grian 1	PZH12-15_10	1.16614e-05	3.11028	2.92852	30.3196	2.32066	2.32414	0.792434	1.52338e-05	1.06207	1.70605e-05	10.3532	0.000148772
	Same grain	PZH12-18_10	7.66406e-06	3.01782	2.84117	29.415	2.25123	2.25448	0.792365	1.65763e-05	1.06217	1.74477e-05	10.3531	0.000150636	-0.0774881	0.0558423	-0.0195497	-0.427461
	Grian 1	PZH12-15_11	-1.5012e-06	3.12319	2.94041	30.4433	2.33003	2.33343	0.792418	1.40499e-05	1.06216	1.94474e-05	10.3534	0.000148356
	Same grain	PZH12-18_11	-3.48853e-06	2.95447	2.78135	28.7938	2.20362	2.20672	0.792289	1.72893e-05	1.06225	1.99128e-05	10.3525	0.000155244	-0.0727797	0.0680932	-0.040317	-0.422754
	Grian 1	PZH12-15_12	-1.77461e-06	3.0372	2.85939	29.6014	2.26542	2.26867	0.792276	1.41965e-05	1.06218	1.8416e-05	10.3523	0.000145839
	Same grain	PZH12-18_12	5.28513e-06	3.00655	2.8304	29.3007	2.24235	2.2454	0.792237	1.31331e-05	1.06224	1.78729e-05	10.3522	0.000133396	-0.0368905	0.0448715	-0.00974822	-0.386878
	Grian 1	PZH12-15_13	-6.5974e-06	3.04016	2.86216	29.6296	2.26757	2.27056	0.792257	1.56657e-05	1.06219	2.08611e-05	10.3522	0.000138257
	Same grain	PZH12-18_13	-1.89207e-05	3.10302	2.92124	30.2401	2.31428	2.31719	0.792225	1.45632e-05	1.06223	1.81572e-05	10.3518	0.000139309	0.00323177	0.00133218	-0.0115011	-0.346769
	Grain 2	PZH12-15_14	4.17017e-06	2.99687	2.82122	29.2044	2.23494	2.23789	0.792187	1.53695e-05	1.06226	1.9678e-05	10.3517	0.000154108
	Same grain	PZH12-18_14	6.14008e-06	3.02353	2.84637	29.4639	2.25471	2.25752	0.792138	1.41079e-05	1.06224	1.81627e-05	10.3514	0.000152727	-0.040896	-0.021528	-0.0160207	-0.390882
	Grain 2	PZH12-15_15	7.55228e-06	2.81787	2.6527	27.4594	2.10134	2.1042	0.792153	1.60031e-05	1.06227	1.96182e-05	10.3515	0.000142592
	Same grain	PZH12-18_15	1.55836e-05	2.96868	2.79444	28.9268	2.21357	2.21629	0.792135	1.60165e-05	1.06235	1.65178e-05	10.3516	0.000155577	0.00973474	0.0716051	0.012889	-0.340269
	Grain 2	PZH12-15_16	1.78386e-05	2.77028	2.60785	26.9948	2.06568	2.06848	0.792101	1.60356e-05	1.06228	2.10437e-05	10.3513	0.000157978
	Same grain	PZH12-18_16	-1.22734e-05	2.96437	2.79053	28.8854	2.21043	2.21303	0.792121	1.46313e-05	1.06229	2.1226e-05	10.3512	0.000156534	0.00621051	-0.0121718	-0.0123848	-0.343792
	Grain 2	PZH12-15_17	2.0832e-05	2.81313	2.64807	27.4112	2.09762	2.1004	0.79213	1.46257e-05	1.06233	1.78062e-05	10.3514	0.000140327
	Same grain	PZH12-18_17	7.5416e-06	2.94953	2.77636	28.7369	2.1989	2.20148	0.792012	1.45298e-05	1.06237	2.08416e-05	10.3506	0.000152021	-0.0861296	0.0205679	-0.0396153	-0.436099
	Grain 2	PZH12-15_18	-1.00155e-05	2.77241	2.60964	27.0114	2.06691	2.06954	0.792031	1.50064e-05	1.06237	2.0265e-05	10.3506	0.000134478
	Same grain	PZH12-18_18	-1.8098e-06	2.99338	2.81752	29.1634	2.23143	2.23394	0.791985	1.62524e-05	1.06242	1.94488e-05	10.3507	0.000151978	-0.0337541	0.0176351	0.0129438	-0.383742
	Grain 2	PZH12-15_19	3.79589e-06	2.74438	2.58314	26.737	2.04582	2.0482	0.791992	1.50327e-05	1.06242	1.93664e-05	10.3506	0.000134909
	Same grain	PZH12-18_19	1.70251e-05	2.93761	2.7651	28.6199	2.18981	2.1922	0.79195	1.4082e-05	1.06239	1.91835e-05	10.3504	0.000139111	-0.0216709	-0.0428692	-0.00659853	-0.371663
	Grain 2	PZH12-15_20	5.13057e-06	2.75497	2.59304	26.8389	2.05354	2.05608	0.791941	1.5451e-05	1.06245	1.63483e-05	10.3504	0.000129522
	Same grain	PZH12-18_20	-1.13863e-05	2.9191	2.74751	28.4376	2.17585	2.1781	0.791936	1.34778e-05	1.06245	2.23603e-05	10.3503	0.0001524	0.0284009	0.00399075	0.0243863	-0.321609
	Grain 2	PZH12-15_21	-1.17216e-05	2.75669	2.59466	26.854	2.05467	2.05702	0.791885	1.425e-05	1.06245	1.79472e-05	10.3497	0.000133882
Time	Grain	Sample	44Ca	46Ti	47Ti	48Ti	49Ti	50Ti	49Ti/47Ti	se	46Ti/47Ti	se	48Ti/47Ti	se	δ49/47Ti	δ46/47Ti	δ48/47Ti	To OL-Ti		-0.35
																		δ49/47Ti
2022-02-23	Grian 1	PZH12-15_01	4.11257e-06	3.55407	3.34554	34.6318	2.65008	2.65342	0.792124	1.51382e-05	1.06233	1.77027e-05	10.3516	0.00015016
	Grain 1	PZH12-18_01	1.92767e-05	3.65669	3.44223	35.6342	2.7269	2.73025	0.792189	1.52418e-05	1.0623	1.70163e-05	10.352	0.000146421	0.00122737	-0.0125059	0.00150796	-0.348773
	Grian 2	PZH12-15_02	4.40188e-06	3.6659	3.45089	35.7251	2.73398	2.73731	0.792251	1.61993e-05	1.0623	1.86443e-05	10.3524	0.000139713
	Grain 2	PZH12-18_02	1.33621e-05	3.34251	3.14653	32.5729	2.49266	2.49609	0.792195	1.60077e-05	1.06228	1.81012e-05	10.352	0.000151617	-0.0361398	-0.000340726	-0.0241494	-0.386127
	Grian 3	PZH12-15_03	-7.0887e-06	3.61375	3.40195	35.2173	2.69502	2.69857	0.792197	1.40261e-05	1.06226	1.5536e-05	10.3521	0.000105062
	Grain 3	PZH12-18_03	-6.04872e-06	3.21794	3.02922	31.3596	2.3999	2.40327	0.792254	1.49359e-05	1.0623	1.84913e-05	10.3524	0.000142504	0.0776664	0.017019	0.039088	-0.272361
	Grian 4	PZH12-15_04	7.70164e-06	3.83258	3.60781	37.3476	2.85807	2.86142	0.792188	1.52173e-05	1.0623	1.65718e-05	10.3519	0.000131298
	Grain 4	PZH12-18_04	1.85386e-05	3.41825	3.21764	33.3076	2.54867	2.55194	0.792091	1.4383e-05	1.06235	1.88503e-05	10.3515	0.000147481	-0.109042	0.0503778	-0.0296395	-0.459004
	Grian 5	PZH12-15_05	-7.73447e-06	3.55281	3.3445	34.6218	2.6494	2.65273	0.792166	1.39563e-05	1.06228	1.80005e-05	10.3518	0.000137521
	Grain 5	PZH12-18_05	1.55926e-05	3.66082	3.44616	35.6749	2.72999	2.73332	0.792184	1.3391e-05	1.06229	1.68025e-05	10.3521	0.000127246	-0.0357647	0.013346	0.000885609	-0.385752
	Grian 6	PZH12-15_06	-8.30657e-06	3.71977	3.50172	36.2509	2.77426	2.77753	0.792258	1.50297e-05	1.06227	1.6062e-05	10.3523	0.000138451
	Grain 6	PZH12-18_06	2.80109e-06	3.58972	3.37916	34.9806	2.67691	2.68015	0.792182	1.48534e-05	1.06231	1.64477e-05	10.3518	0.00013792	-0.0878223	0.0608118	-0.0454563	-0.437792
	Grian 7	PZH12-15_07	8.53981e-06	3.75818	3.53802	36.6268	2.80299	2.80642	0.792246	1.60719e-05	1.06222	1.61264e-05	10.3523	0.000143373
	Grain 7	PZH12-18_07	1.97484e-05	3.41164	3.21147	33.2447	2.54406	2.54723	0.792181	1.58566e-05	1.06233	1.87831e-05	10.3519	0.000128983	-0.0999044	0.103386	-0.051197	-0.449869
	Grian 8	PZH12-15_08	7.42182e-06	3.4426	3.24095	33.552	2.56772	2.57115	0.792275	1.58435e-05	1.06222	1.60157e-05	10.3525	0.000142655
	Grain 8	PZH12-18_08	-6.51442e-06	3.51698	3.31068	34.2714	2.6226	2.62583	0.792162	1.66605e-05	1.06231	1.81053e-05	10.3517	0.000153165	-0.091963	0.0631269	-0.0474232	-0.441931
	Grian 9	PZH12-15_09	7.84206e-06	3.52398	3.3174	34.3416	2.62803	2.63136	0.792195	1.59191e-05	1.06227	1.83253e-05	10.352	0.000150493
	Grain 9	PZH12-18_09	8.12381e-06	3.49838	3.29334	34.0928	2.60905	2.61224	0.792218	1.65287e-05	1.06226	1.73687e-05	10.352	0.000147546	-0.00717756	0.0194046	-0.0119498	-0.357175
	Grian 10	PZH12-15_10	-1.75854e-05	3.75255	3.53279	36.5729	2.79887	2.8023	0.792252	1.35533e-05	1.0622	1.6214e-05	10.3524	0.000131146
	Grain 10	PZH12-18_10	-2.20007e-06	3.52889	3.32193	34.3884	2.6316	2.63475	0.79219	1.38191e-05	1.0623	1.72904e-05	10.3519	0.000144789	-0.0390606	0.0522998	-0.0271655	-0.389047
	Grian 11	PZH12-15_11	-1.56323e-06	3.59544	3.38464	35.0378	2.68127	2.68455	0.792188	1.6245e-05	1.06228	1.95241e-05	10.352	0.000159753
	Grain 11	PZH12-18_11	-1.12481e-06	3.37811	3.18003	32.9197	2.5193	2.52239	0.792226	1.51259e-05	1.06229	1.8583e-05	10.352	0.000132928	0.0282794	0.0263855	0.00401007	-0.321731
	Grian 12	PZH12-15_12	2.57196e-05	3.67442	3.45912	35.8088	2.74039	2.74357	0.792219	1.44551e-05	1.06224	1.78642e-05	10.352	0.000133972
	Grain 12	PZH12-18_12	-1.69516e-05	3.37073	3.17296	32.8458	2.51348	2.51659	0.792157	1.4923e-05	1.06233	1.93463e-05	10.3518	0.00015407	-0.0668522	0.0491452	-0.0222567	-0.416829
	Grian 13	PZH12-15_13	-3.39955e-06	3.59144	3.38077	34.9979	2.67825	2.68139	0.792201	1.70919e-05	1.06232	1.91027e-05	10.352	0.000139729
	Grain 13	PZH12-18_13	-9.95632e-06	3.46515	3.26191	33.7653	2.58387	2.58683	0.792134	1.38602e-05	1.06231	1.81644e-05	10.3514	0.000146337	-0.0627137	0.000110409	-0.0511496	-0.412692
	Grian 14	PZH12-15_14	-2.28977e-05	3.73711	3.51793	36.417	2.78679	2.7899	0.792166	1.35009e-05	1.0623	1.68216e-05	10.3518	0.000138281
	Grain 14	PZH12-18_14	2.24829e-06	3.2247	3.03533	31.4191	2.4042	2.40702	0.792071	1.34822e-05	1.06239	1.58597e-05	10.3511	0.000109607	-0.142338	0.104918	-0.0682777	-0.492288
	Grian 15	PZH12-15_15	1.14293e-06	3.51728	3.31114	34.2765	2.62309	2.62627	0.792202	1.42591e-05	1.06226	1.65556e-05	10.3519	0.000139875
	Grain 15	PZH12-18_15	6.34647e-06	3.42167	3.22083	33.3395	2.5512	2.55421	0.792094	1.70043e-05	1.06236	1.72115e-05	10.3512	0.000146863	-0.0898743	0.0665457	-0.0450155	-0.439843
	Grian 16	PZH12-15_16	3.0656e-05	3.51648	3.3102	34.2655	2.6221	2.62509	0.792128	1.30183e-05	1.06232	1.91557e-05	10.3515	0.000126777
	Grain 16	PZH12-18_16	6.62884e-06	3.26755	3.07587	31.8424	2.43668	2.43993	0.792193	1.37741e-05	1.06232	1.95517e-05	10.3523	0.000130187	0.0492198	0.0266238	0.0648288	-0.300797
	Grian 17	PZH12-15_17	1.89584e-05	3.63519	3.42212	35.4251	2.71094	2.7141	0.792181	1.55898e-05	1.06226	1.58861e-05	10.3518	0.00012698
	Grain 17	PZH12-18_17	-5.87585e-06	3.40465	3.20496	33.1753	2.53868	2.54164	0.792111	1.7456e-05	1.06231	1.84513e-05	10.3512	0.000156332	-0.0614438	0.00736441	-0.0392523	-0.411422
	Grian 18	PZH12-15_18	-2.66743e-06	3.59235	3.38156	35.0041	2.67866	2.68164	0.792139	1.38942e-05	1.06234	1.72376e-05	10.3515	0.000145846
	Grain 18	PZH12-18_18	1.8552e-05	3.51677	3.31051	34.2689	2.62238	2.62538	0.792135	1.42363e-05	1.0623	1.67814e-05	10.3515	0.0001497	-0.0120865	-0.0170533	0.00628535	-0.362082
	Grian 19	PZH12-15_19	1.80903e-06	3.59601	3.3851	35.0407	2.68151	2.68453	0.792151	1.21758e-05	1.06231	1.70482e-05	10.3515	0.000123155
	Grain 19	PZH12-18_19	7.23115e-07	3.25632	3.06518	31.729	2.42797	2.43089	0.792115	1.27958e-05	1.06236	1.79834e-05	10.3514	0.000139261	-0.00326742	0.000486821	0.00067308	-0.353266
	Grian 20	PZH12-15_20	-9.64842e-06	3.45416	3.25126	33.6551	2.57527	2.57819	0.792085	1.36863e-05	1.06241	1.97573e-05	10.3514	0.000138583
	Grain 20	PZH12-18_20	-4.52571e-06	3.17864	2.99201	30.9702	2.36975	2.37267	0.792028	1.36816e-05	1.06238	1.71958e-05	10.351	0.000117196	-0.0474563	-0.00652374	-0.0207518	-0.39744
	Grian 21	PZH12-15_21	4.6444e-06	3.70539	3.48789	36.1031	2.76257	2.76544	0.792046	1.45853e-05	1.06236	1.71135e-05	10.351	0.000135394
Time	Grain	Sample	44Ca	46Ti	47Ti	48Ti	49Ti	50Ti	49Ti/47Ti	se	46Ti/47Ti	se	48Ti/47Ti	se	δ49/47Ti	δ46/47Ti	δ48/47Ti	To OL-Ti		-0.35
																		δ49/47Ti
2022-02-23	Grian 1	PZH12-15_01	1.25403e-05	3.38486	3.18561	32.9691	2.52241	2.52579	0.791816	1.45596e-05	1.06255	1.54173e-05	10.3494	0.000134101
	Grain 1	PZH12-18_01	-9.61266e-06	3.48098	3.27605	33.9058	2.59407	2.59731	0.791828	1.73651e-05	1.06255	2.07786e-05	10.3496	0.000171296	0.0296922	-0.00375083	0.0216954	-0.320318
	Grian 2	PZH12-15_02	1.13849e-05	3.4267	3.22492	33.3759	2.55347	2.55669	0.791793	1.37232e-05	1.06257	1.74018e-05	10.3493	0.000144311
	Grain 2	PZH12-18_02	-3.26806e-06	3.16242	2.97607	30.8011	2.35656	2.35976	0.791839	1.39355e-05	1.06262	1.70458e-05	10.3496	0.000129177	0.0497114	0.0510485	0.0100328	-0.300306
	Grian 3	PZH12-15_03	9.84436e-06	3.43488	3.23264	33.4568	2.55962	2.56301	0.791807	1.55651e-05	1.06256	1.95775e-05	10.3497	0.00015141
	Grain 3	PZH12-18_03	2.18352e-06	3.08298	2.90143	30.0281	2.29745	2.3007	0.791834	1.53466e-05	1.06257	2.0599e-05	10.3494	0.0001362	0.00922739	0.00215456	-0.0235955	-0.340776
	Grian 4	PZH12-15_04	1.61623e-05	3.64963	3.43471	35.5478	2.71977	2.72303	0.791847	1.30541e-05	1.06257	1.36197e-05	10.3496	0.00012644
	Grain 4	PZH12-18_04	-8.24983e-06	3.30949	3.11454	32.233	2.466	2.46921	0.791767	1.44425e-05	1.06259	1.71062e-05	10.3492	0.000140868	-0.0756203	0.0344413	-0.0293224	-0.425594
	Grian 5	PZH12-15_05	1.7579e-05	3.38485	3.18563	32.9693	2.5224	2.5257	0.791806	1.28767e-05	1.06254	1.73101e-05	10.3494	0.000131294
	Grain 5	PZH12-18_05	-4.16446e-06	3.42863	3.2268	33.3966	2.55523	2.55843	0.791878	1.58464e-05	1.06255	1.63711e-05	10.3498	0.000121338	0.0616836	0.0143415	0.0229584	-0.288338
	Grian 6	PZH12-15_06	1.77007e-05	3.56527	3.35547	34.728	2.65703	2.66032	0.791852	1.60008e-05	1.06252	1.93744e-05	10.3497	0.000129606
	Grain 6	PZH12-18_06	2.46429e-06	3.46186	3.25805	33.7193	2.5798	2.58308	0.791823	1.54342e-05	1.06256	1.83629e-05	10.3495	0.000159266	-0.0764217	0.0177975	-0.0432653	-0.426395
	Grian 7	PZH12-15_07	1.07492e-05	3.59017	3.37882	34.9716	2.67574	2.67904	0.791915	1.29651e-05	1.06255	1.53858e-05	10.3503	0.000135764
	Grain 7	PZH12-18_07	2.00495e-05	3.35901	3.16126	32.7171	2.50308	2.50631	0.791801	1.40443e-05	1.06255	1.87923e-05	10.3494	0.000136247	-0.155721	0.0297903	-0.0772474	-0.505667
	Grian 8	PZH12-15_08	7.05158e-07	3.32606	3.13043	32.4004	2.47909	2.48239	0.791933	1.35653e-05	1.06249	1.86321e-05	10.3501	0.000138564
	Grain 8	PZH12-18_08	4.07096e-06	3.41	3.20938	33.2144	2.54119	2.54443	0.7918	1.69554e-05	1.06251	1.89968e-05	10.3491	0.000157379	-0.122511	0.0100751	-0.0753444	-0.472468
	Grian 9	PZH12-15_09	1.23185e-05	3.39825	3.19834	33.1018	2.53264	2.53605	0.79186	1.3453e-05	1.0625	1.85348e-05	10.3497	0.000125189
	Grain 9	PZH12-18_09	7.74238e-06	3.36453	3.16654	32.7723	2.50743	2.51074	0.791852	1.60427e-05	1.06253	1.93826e-05	10.3496	0.000150941	-0.0740814	0.0425711	-0.0497587	-0.424055
	Grian 10	PZH12-15_10	1.11674e-05	3.64012	3.42613	35.4621	2.71337	2.71684	0.791962	1.51551e-05	1.06246	1.75e-05	10.3505	0.00014924
	Grain 10	PZH12-18_10	-3.97012e-06	3.40705	3.20661	33.1887	2.53931	2.54266	0.791898	1.2937e-05	1.06251	1.86894e-05	10.3501	0.000129872	-0.0238961	0.0262204	-0.00309427	-0.373888
	Grian 11	PZH12-15_11	-7.31426e-06	3.45329	3.25017	33.6383	2.57372	2.577	0.791873	1.37918e-05	1.0625	1.82606e-05	10.3497	0.000117697
	Grain 11	PZH12-18_11	3.06232e-07	3.32277	3.12714	32.3663	2.47634	2.47961	0.791888	1.57126e-05	1.06256	1.82447e-05	10.3501	0.000140121	0.00540942	0.0580154	0.0243627	-0.344592
	Grian 12	PZH12-15_12	-7.53764e-06	3.57549	3.36517	34.8298	2.66487	2.6682	0.791894	1.44005e-05	1.0625	1.67937e-05	10.3501	0.000131289
	Grain 12	PZH12-18_12	-6.88479e-06	3.35479	3.15742	32.6786	2.50027	2.50354	0.791868	1.40621e-05	1.06251	1.63998e-05	10.3498	0.00014261	-0.00521941	-0.0103756	-0.0101807	-0.355218
	Grian 13	PZH12-15_13	4.85423e-06	3.45111	3.24798	33.6157	2.57192	2.57517	0.791851	1.41146e-05	1.06254	1.60114e-05	10.3497	0.000130658
	Grain 13	PZH12-18_13	1.23675e-05	3.45761	3.25405	33.6768	2.57652	2.57971	0.791788	1.49145e-05	1.06255	1.6818e-05	10.3492	0.000142538	-0.0700395	0.0220136	-0.04402	-0.420015
	Grian 14	PZH12-15_14	-1.80331e-05	3.63961	3.42544	35.4518	2.71239	2.71555	0.791836	1.29623e-05	1.06252	1.94261e-05	10.3496	0.000138194
	Grain 14	PZH12-18_14	-2.27889e-06	3.47506	3.27053	33.8478	2.58961	2.59287	0.791801	1.53832e-05	1.06254	1.7635e-05	10.3493	0.000138729	-0.0672499	0.0140513	-0.0334548	-0.417226
	Grian 15	PZH12-15_15	1.89268e-05	3.41701	3.21592	33.284	2.5466	2.54991	0.791872	1.90534e-05	1.06253	2.10914e-05	10.3498	0.000177049
	Grain 15	PZH12-18_15	3.33367e-07	3.27186	3.07928	31.8685	2.43826	2.44145	0.791828	1.44048e-05	1.06254	1.86497e-05	10.3493	0.000143247	-0.0200201	-0.0240461	-0.0323265	-0.370013
	Grian 16	PZH12-15_16	-5.74521e-06	3.38964	3.18995	33.0144	2.52585	2.52908	0.791815	1.73888e-05	1.0626	1.68063e-05	10.3495	0.000137018
	Grain 16	PZH12-18_16	2.15386e-05	3.15237	2.96669	30.7039	2.34912	2.35232	0.791832	1.29762e-05	1.06259	1.8173e-05	10.3496	0.000133355	0.00544247	0.016865	-0.00865333	-0.344559
	Grian 17	PZH12-15_17	1.90337e-06	3.53431	3.32626	34.4261	2.63387	2.63724	0.791841	1.31994e-05	1.06254	1.97553e-05	10.3498	0.000135184
	Grain 17	PZH12-18_17	1.44296e-05	3.406	3.20551	33.1747	2.53809	2.54123	0.791791	1.49837e-05	1.06254	1.84512e-05	10.3493	0.000147077	-0.0335776	-0.020132	-0.0272557	-0.383566
	Grian 18	PZH12-15_18	1.30525e-06	3.49372	3.28793	34.028	2.60337	2.60657	0.791794	1.49247e-05	1.06259	1.58476e-05	10.3493	0.00012874
	Grain 18	PZH12-18_18	-7.27442e-06	3.24125	3.05041	31.5693	2.41522	2.41851	0.791768	1.61522e-05	1.06256	1.59574e-05	10.3492	0.000135093	-0.0555914	-0.0055934	-0.0218546	-0.405572
	Grian 19	PZH12-15_19	6.38448e-07	3.44052	3.23801	33.5118	2.56395	2.5672	0.791831	1.50051e-05	1.06254	1.79766e-05	10.3495	0.000138664
	Grain 19	PZH12-18_19	-3.48829e-06	3.2301	3.03983	31.461	2.40704	2.41024	0.791834	1.57548e-05	1.06259	2.00968e-05	10.3496	0.000142863	0.0082257	0.0320267	-0.00136945	-0.341777
	Grian 20	PZH12-15_20	-1.28603e-06	3.3257	3.12986	32.3932	2.4783	2.48148	0.791824	1.47104e-05	1.06257	1.68268e-05	10.3497	0.000118673
	Grain 20	PZH12-18_20	-3.14698e-06	3.12706	2.94295	30.4573	2.33024	2.3334	0.791805	1.53151e-05	1.06256	1.77969e-05	10.3492	0.000148306	-0.0345923	0.00960913	-0.05039	-0.38458
	Grian 21	PZH12-15_21	-1.4724e-06	3.64473	3.43025	35.5024	2.71621	2.71936	0.79184	1.53572e-05	1.06253	1.66951e-05	10.3498	0.00014181
															-0.0357207	0.0158562	-0.0226042	-0.385708
															0.0973272	0.0444059	0.0597061	0.0972931

## Sheet: Moosilauke ilmenite
Time	Grain	Sample	44Ca	46Ti	47Ti	48Ti	49Ti	50Ti	49Ti/47Ti	se	46Ti/47Ti	se	48Ti/47Ti	se	δ49/47Ti	δ46/47Ti	δ48/47Ti	To OL-Ti		-0.35
																		δ49/47Ti
2022-02-23	Grian 1	PZH12-15_01	4.11257e-06	3.55407	3.34554	34.6318	2.65008	2.65342	0.792124	1.51382e-05	1.06233	1.77027e-05	10.3516	0.00015016
	Grain 1	Mosilauke_01	-6.54632e-06	3.29399	3.10176	32.116	2.45835	2.46237	0.792566	1.34738e-05	1.06197	1.65166e-05	10.3541	0.000139081	0.477424	-0.322766	0.203868	0.127257
	Grian 2	PZH12-15_02	4.40188e-06	3.6659	3.45089	35.7251	2.73398	2.73731	0.792251	1.61993e-05	1.0623	1.86443e-05	10.3524	0.000139713
	Grain 2	Mosilauke_02	-2.22495e-05	3.42925	3.22887	33.4307	2.55879	2.56275	0.792469	1.67261e-05	1.06206	1.8052e-05	10.3537	0.000165881	0.309428	-0.208191	0.138111	-0.0406801
	Grian 3	PZH12-15_03	-7.0887e-06	3.61375	3.40195	35.2173	2.69502	2.69857	0.792197	1.40261e-05	1.06226	1.5536e-05	10.3521	0.000105062
	Grain 3	Mosilauke_03	3.87459e-05	2.9231	2.75236	28.4967	2.18114	2.18514	0.792454	1.89618e-05	1.06204	1.67597e-05	10.3535	0.000173165	0.330485	-0.230234	0.14662	-0.019631
	Grian 4	PZH12-15_04	7.70164e-06	3.83258	3.60781	37.3476	2.85807	2.86142	0.792188	1.52173e-05	1.0623	1.65718e-05	10.3519	0.000131298
	Grain 4	Mosilauke_04	-6.72332e-06	3.25332	3.06318	31.7179	2.42776	2.43168	0.79256	1.66108e-05	1.06207	1.63034e-05	10.3546	0.000138381	0.48401	-0.207044	0.261547	0.133841
	Grian 5	PZH12-15_05	-7.73447e-06	3.55281	3.3445	34.6218	2.6494	2.65273	0.792166	1.39563e-05	1.06228	1.80005e-05	10.3518	0.000137521
	Grain 5	Mosilauke_05	-4.63786e-06	3.25786	3.06755	31.7622	2.43118	2.43515	0.792548	1.3845e-05	1.06204	1.89116e-05	10.3542	0.000125565	0.423765	-0.223811	0.208883	0.0736163
	Grian 6	PZH12-15_06	-8.30657e-06	3.71977	3.50172	36.2509	2.77426	2.77753	0.792258	1.50297e-05	1.06227	1.6062e-05	10.3523	0.000138451
	Grain 6	Mosilauke_06	-7.26642e-06	3.3866	3.18853	33.0148	2.52696	2.53078	0.792516	1.42735e-05	1.06212	1.62273e-05	10.3542	0.000120476	0.333353	-0.121305	0.18334	-0.016764
	Grian 7	PZH12-15_07	8.53981e-06	3.75818	3.53802	36.6268	2.80299	2.80642	0.792246	1.60719e-05	1.06222	1.61264e-05	10.3523	0.000143373
	Grain 7	Mosilauke_07	1.58579e-05	3.45226	3.25038	33.6533	2.57581	2.57957	0.792461	1.63874e-05	1.06211	1.9196e-05	10.3537	0.000170127	0.253506	-0.101938	0.120128	-0.0965832
	Grian 8	PZH12-15_08	7.42182e-06	3.4426	3.24095	33.552	2.56772	2.57115	0.792275	1.58435e-05	1.06222	1.60157e-05	10.3525	0.000142655
	Grain 8	Mosilauke_08	-2.41492e-05	3.35146	3.15551	32.6703	2.50053	2.50424	0.792432	1.43445e-05	1.0621	1.75031e-05	10.3534	0.000153908	0.248531	-0.136711	0.11498	-0.101556
	Grian 9	PZH12-15_09	7.84206e-06	3.52398	3.3174	34.3416	2.62803	2.63136	0.792195	1.59191e-05	1.06227	1.83253e-05	10.352	0.000150493
	Grain 9	Mosilauke_09	-4.14594e-06	3.29081	3.09848	32.082	2.45559	2.45937	0.792517	1.68536e-05	1.06207	1.79794e-05	10.3541	0.000139096	0.370523	-0.154369	0.187732	0.0203933
	Grian 10	PZH12-15_10	-1.75854e-05	3.75255	3.53279	36.5729	2.79887	2.8023	0.792252	1.35533e-05	1.0622	1.6214e-05	10.3524	0.000131146
	Grain 10	Mosilauke_10	7.69973e-06	3.16066	2.97589	30.8134	2.35856	2.36226	0.792556	1.58356e-05	1.06209	1.76701e-05	10.3543	0.000137995	0.424178	-0.146254	0.207156	0.0740294
	Grian 11	PZH12-15_11	-1.56323e-06	3.59544	3.38464	35.0378	2.68127	2.68455	0.792188	1.6245e-05	1.06228	1.95241e-05	10.352	0.000159753
	Grain 11	Mosilauke_11	2.47072e-05	3.15607	2.97159	30.7671	2.3549	2.35859	0.792475	1.67224e-05	1.06208	1.77313e-05	10.3538	0.000137902	0.342048	-0.166952	0.171807	-0.00807178
	Grian 12	PZH12-15_12	2.57196e-05	3.67442	3.45912	35.8088	2.74039	2.74357	0.792219	1.44551e-05	1.06224	1.78642e-05	10.352	0.000133972
	Grain 12	Mosilauke_12	1.86831e-06	3.36814	3.1712	32.8334	2.51302	2.51665	0.792447	1.61451e-05	1.0621	1.84319e-05	10.3536	0.000167139	0.299204	-0.16479	0.151147	-0.0509007
	Grian 13	PZH12-15_13	-3.39955e-06	3.59144	3.38077	34.9979	2.67825	2.68139	0.792201	1.70919e-05	1.06232	1.91027e-05	10.352	0.000139729
	Grain 13	Mosilauke_13	1.08425e-05	3.13424	2.95099	30.5533	2.33852	2.34204	0.792445	1.85706e-05	1.0621	1.6131e-05	10.3535	0.000156753	0.330913	-0.200091	0.153435	-0.0192028
	Grian 14	PZH12-15_14	-2.28977e-05	3.73711	3.51793	36.417	2.78679	2.7899	0.792166	1.35009e-05	1.0623	1.68216e-05	10.3518	0.000138281
	Grain 14	Mosilauke_14	-1.59967e-05	3.23916	3.04992	31.579	2.4171	2.42074	0.792515	1.34013e-05	1.06205	1.72024e-05	10.3541	0.000126664	0.418066	-0.219125	0.215019	0.06792
	Grian 15	PZH12-15_15	1.14293e-06	3.51728	3.31114	34.2765	2.62309	2.62627	0.792202	1.42591e-05	1.06226	1.65556e-05	10.3519	0.000139875
	Grain 15	Mosilauke_15	-8.68718e-06	3.4038	3.20466	33.1804	2.53951	2.54313	0.792444	1.26607e-05	1.06214	2.03249e-05	10.3538	0.000135714	0.351698	-0.138098	0.20131	0.00157507
	Grian 16	PZH12-15_16	3.0656e-05	3.51648	3.3102	34.2655	2.6221	2.62509	0.792128	1.30183e-05	1.06232	1.91557e-05	10.3515	0.000126777
	Grain 16	Mosilauke_16	-1.43218e-06	3.53377	3.32717	34.4488	2.63664	2.64028	0.792457	1.44087e-05	1.06209	1.69022e-05	10.3538	0.000146213	0.38237	-0.184365	0.204506	0.0322358
	Grian 17	PZH12-15_17	1.89584e-05	3.63519	3.42212	35.4251	2.71094	2.7141	0.792181	1.55898e-05	1.06226	1.58861e-05	10.3518	0.00012698
	Grain 17	Mosilauke_17	1.32599e-05	3.33401	3.13909	32.5004	2.48746	2.49116	0.792415	1.51269e-05	1.06209	1.80353e-05	10.3534	0.000114575	0.321692	-0.194706	0.174804	-0.0284203
	Grian 18	PZH12-15_18	-2.66743e-06	3.59235	3.38156	35.0041	2.67866	2.68164	0.792139	1.38942e-05	1.06234	1.72376e-05	10.3515	0.000145846
	Grain 18	Mosilauke_18	1.77698e-05	3.35166	3.15566	32.6718	2.50058	2.50424	0.792411	1.25021e-05	1.06211	1.66349e-05	10.3534	0.000116999	0.335689	-0.196961	0.188185	-0.0144285
	Grian 19	PZH12-15_19	1.80903e-06	3.59601	3.3851	35.0407	2.68151	2.68453	0.792151	1.21758e-05	1.06231	1.70482e-05	10.3515	0.000123155
	Grain 19	Mosilauke_19	4.11425e-06	3.22836	3.03948	31.4698	2.40863	2.41215	0.792445	1.48147e-05	1.06214	1.71245e-05	10.3537	0.00012593	0.4136	-0.205781	0.214853	0.0634557
	Grian 20	PZH12-15_20	-9.64842e-06	3.45416	3.25126	33.6551	2.57527	2.57819	0.792085	1.36863e-05	1.06241	1.97573e-05	10.3514	0.000138583
	Grain 20	Mosilauke_20	1.13823e-05	3.26095	3.07018	31.7877	2.43294	2.43656	0.792441	1.57177e-05	1.06213	1.89778e-05	10.3537	0.000145348	0.474257	-0.234287	0.239403	0.124091
	Grian 21	PZH12-15_21	4.6444e-06	3.70539	3.48789	36.1031	2.76257	2.76544	0.792046	1.45853e-05	1.06236	1.71135e-05	10.351	0.000135394
Time	Grain	Sample	44Ca	46Ti	47Ti	48Ti	49Ti	50Ti	49Ti/47Ti	se	46Ti/47Ti	se	48Ti/47Ti	se	δ49/47Ti	δ46/47Ti	δ48/47Ti	To OL-Ti		-0.35
																		δ49/47Ti
2022-02-23	Grian 1	PZH12-15_01	1.25403e-05	3.38486	3.18561	32.9691	2.52241	2.52579	0.791816	1.45596e-05	1.06255	1.54173e-05	10.3494	0.000134101
	Grain 1	Mosilauke_01	-5.11194e-06	3.12028	2.93721	30.4037	2.3265	2.33031	0.792077	1.56152e-05	1.06233	1.92032e-05	10.3512	0.000152507	0.344698	-0.215552	0.176639	-0.00542288
	Grian 2	PZH12-15_02	1.13849e-05	3.4267	3.22492	33.3759	2.55347	2.55669	0.791793	1.37232e-05	1.06257	1.74018e-05	10.3493	0.000144311
	Grain 2	Mosilauke_02	-8.61351e-06	3.27965	3.08704	31.9545	2.44519	2.4491	0.792082	1.86106e-05	1.06239	2.01932e-05	10.3512	0.000168789	0.355809	-0.160825	0.160266	0.0056841
	Grian 3	PZH12-15_03	9.84436e-06	3.43488	3.23264	33.4568	2.55962	2.56301	0.791807	1.55651e-05	1.06256	1.95775e-05	10.3497	0.00015141
	Grain 3	Mosilauke_03	1.09496e-06	3.25978	3.06843	31.761	2.43038	2.43416	0.792057	1.87174e-05	1.06236	1.69859e-05	10.3509	0.000167655	0.291021	-0.194179	0.121193	-0.0590813
	Grian 4	PZH12-15_04	1.61623e-05	3.64963	3.43471	35.5478	2.71977	2.72303	0.791847	1.30541e-05	1.06257	1.36197e-05	10.3496	0.00012644
	Grain 4	Mosilauke_04	3.15156e-06	3.12578	2.94236	30.4587	2.33086	2.33463	0.792173	1.48052e-05	1.06234	1.72264e-05	10.3518	0.000127737	0.408335	-0.198752	0.211569	0.0581925
	Grian 5	PZH12-15_05	1.77007e-05	3.56527	3.35547	34.728	2.65703	2.66032	0.791852	1.60008e-05	1.06252	1.93744e-05	10.3497	0.000129606
	Grain 5	Mosilauke_05	-1.44987e-05	3.17466	2.98834	30.9313	2.36695	2.37074	0.792063	2.10023e-05	1.06235	1.7388e-05	10.3507	0.000190076	0.227522	-0.178324	0.0687292	-0.122558
	Grian 6	PZH12-15_06	1.07492e-05	3.59017	3.37882	34.9716	2.67574	2.67904	0.791915	1.29651e-05	1.06255	1.53858e-05	10.3503	0.000135764
	Grain 6	Mosilauke_06	2.53897e-05	3.25346	3.06254	31.702	2.42595	2.42982	0.792135	1.36881e-05	1.06234	1.88654e-05	10.3516	0.000134499	0.266937	-0.169449	0.130727	-0.0831561
	Grian 7	PZH12-15_07	7.05158e-07	3.32606	3.13043	32.4004	2.47909	2.48239	0.791933	1.35653e-05	1.06249	1.86321e-05	10.3501	0.000138564
	Grain 7	Mosilauke_07	-3.55709e-06	3.21599	3.02715	31.3352	2.39783	2.40164	0.792108	1.43201e-05	1.06238	1.8141e-05	10.3514	0.000143676	0.267403	-0.108044	0.14175	-0.0826903
	Grian 8	PZH12-15_08	1.23185e-05	3.39825	3.19834	33.1018	2.53264	2.53605	0.79186	1.3453e-05	1.0625	1.85348e-05	10.3497	0.000125189
	Grain 8	Mosilauke_08	1.38917e-05	3.29661	3.10331	32.125	2.45839	2.46221	0.792184	1.43844e-05	1.06229	1.89955e-05	10.3519	0.000137664	0.345244	-0.17995	0.171874	-0.00487716
	Grian 9	PZH12-15_09	1.11674e-05	3.64012	3.42613	35.4621	2.71337	2.71684	0.791962	1.51551e-05	1.06246	1.75e-05	10.3505	0.00014924
	Grain 9	Mosilauke_09	1.06161e-05	3.08989	2.90862	30.1109	2.30431	2.30826	0.792236	1.39133e-05	1.06232	1.70762e-05	10.3523	0.000135999	0.4029	-0.145528	0.214919	0.0527589
	Grian 10	PZH12-15_10	-7.31426e-06	3.45329	3.25017	33.6383	2.57372	2.577	0.791873	1.37918e-05	1.0625	1.82606e-05	10.3497	0.000117697
	Grain 10	Mosilauke_10	1.02671e-05	3.2324	3.04277	31.4981	2.41037	2.41427	0.792162	1.85868e-05	1.06232	1.77523e-05	10.3518	0.00014303	0.352225	-0.167311	0.183133	0.00210149
	Grian 11	PZH12-15_11	-7.53764e-06	3.57549	3.36517	34.8298	2.66487	2.6682	0.791894	1.44005e-05	1.0625	1.67937e-05	10.3501	0.000131289
	Grain 11	Mosilauke_11	2.80667e-06	3.01707	2.84006	29.3991	2.24983	2.25363	0.79218	1.56375e-05	1.06233	1.95501e-05	10.3516	0.000138372	0.38872	-0.181801	0.164864	0.0385835
	Grian 12	PZH12-15_12	4.85423e-06	3.45111	3.24798	33.6157	2.57192	2.57517	0.791851	1.41146e-05	1.06254	1.60114e-05	10.3497	0.000130658
	Grain 12	Mosilauke_12	5.90002e-06	3.1095	2.92715	30.3004	2.31875	2.32256	0.792152	1.52732e-05	1.0623	1.77054e-05	10.3515	0.000154634	0.390006	-0.220701	0.180855	0.0398696
	Grian 13	PZH12-15_13	-1.80331e-05	3.63961	3.42544	35.4518	2.71239	2.71555	0.791836	1.29623e-05	1.06252	1.94261e-05	10.3496	0.000138194
	Grain 13	Mosilauke_13	-4.43324e-06	3.20497	3.0169	31.2302	2.38994	2.39369	0.792183	1.31723e-05	1.06234	1.6497e-05	10.3518	0.000117693	0.415614	-0.175972	0.203091	0.065469
	Grian 14	PZH12-15_14	1.89268e-05	3.41701	3.21592	33.284	2.5466	2.54991	0.791872	1.90534e-05	1.06253	2.10914e-05	10.3498	0.000177049
	Grain 14	Mosilauke_14	1.61659e-05	3.14396	2.95938	30.6341	2.34422	2.34804	0.792131	1.65165e-05	1.06237	1.85619e-05	10.3515	0.000132962	0.363219	-0.178992	0.179995	0.0130918
	Grian 15	PZH12-15_15	-5.74521e-06	3.38964	3.18995	33.0144	2.52585	2.52908	0.791815	1.73888e-05	1.0626	1.68063e-05	10.3495	0.000137018
	Grain 15	Mosilauke_15	3.93296e-06	3.15935	2.97398	30.7855	2.35581	2.35965	0.792139	1.25319e-05	1.06233	1.83361e-05	10.3516	0.000125031	0.39308	-0.227746	0.192337	0.042942
	Grian 16	PZH12-15_16	1.90337e-06	3.53431	3.32626	34.4261	2.63387	2.63724	0.791841	1.31994e-05	1.06254	1.97553e-05	10.3498	0.000135184
	Grain 16	Mosilauke_16	-2.35424e-06	3.15606	2.97084	30.7519	2.35322	2.35697	0.792106	1.61109e-05	1.06234	1.66305e-05	10.3512	0.00014912	0.363952	-0.209799	0.162066	0.013825
	Grian 17	PZH12-15_17	1.30525e-06	3.49372	3.28793	34.028	2.60337	2.60657	0.791794	1.49247e-05	1.06259	1.58476e-05	10.3493	0.00012874
	Grain 17	Mosilauke_17	3.09749e-05	3.32041	3.12543	32.3521	2.47556	2.47931	0.792069	1.49825e-05	1.06239	1.60423e-05	10.3512	0.000154259	0.324177	-0.1688	0.173229	-0.0259361
	Grian 18	PZH12-15_18	6.38448e-07	3.44052	3.23801	33.5118	2.56395	2.5672	0.791831	1.50051e-05	1.06254	1.79766e-05	10.3495	0.000138664
	Grain 18	Mosilauke_18	-5.77033e-06	3.15332	2.96816	30.7253	2.35114	2.35485	0.792121	1.61322e-05	1.06238	1.82835e-05	10.3516	0.00014418	0.370074	-0.165224	0.19479	0.0199447
	Grian 19	PZH12-15_19	-1.28603e-06	3.3257	3.12986	32.3932	2.4783	2.48148	0.791824	1.47104e-05	1.06257	1.68268e-05	10.3497	0.000118673
	Grain 19	Mosilauke_19	4.6274e-06	3.33143	3.13602	32.4621	2.48411	2.48781	0.792122	1.64802e-05	1.06231	2.00673e-05	10.3514	0.00016042	0.365287	-0.223516	0.156102	0.0151594
	Grian 20	PZH12-15_20	-1.4724e-06	3.64473	3.43025	35.5024	2.71621	2.71936	0.79184	1.53572e-05	1.06253	1.66951e-05	10.3498	0.00014181
															0.357973	-0.18534	0.176281	0.00784811
															0.122946	0.0811638	0.074143	0.122903

## Sheet: KNW rutile
Time	Grain	Sample	44Ca	46Ti	47Ti	48Ti	49Ti	50Ti	49Ti/47Ti	se	46Ti/47Ti	se	48Ti/47Ti	se	δ49/47Ti	δ46/47Ti	δ48/47Ti	To OL-Ti		-0.35
																		δ49/47Ti
2022-02-24	Grian 1	PZH12-15_01	2.39044e-05	3.59003	3.37847	34.962	2.6748	2.67792	0.791718	1.64488e-05	1.06262	1.76058e-05	10.3485	0.000187204
	Grain 1	KNW_01	3.23869e-07	3.31286	3.11722	32.2525	2.46702	2.47894	0.791411	1.7285e-05	1.06277	2.29126e-05	10.3465	0.000176114	-0.406965	0.139169	-0.214451	-0.756822
	Grian 2	PZH12-15_02	-1.26427e-05	3.53059	3.32255	34.3853	2.63063	2.63378	0.791749	1.46937e-05	1.06262	1.63863e-05	10.349	0.000121584
	Grain 1	KNW_02	-8.63358e-06	3.29765	3.10273	32.1027	2.4555	2.46729	0.791396	1.74072e-05	1.06283	2.09863e-05	10.3466	0.000151283	-0.489319	0.225279	-0.250887	-0.839147
	Grian 3	PZH12-15_03	-2.3552e-06	3.81959	3.59472	37.2028	2.84637	2.84941	0.791818	1.37555e-05	1.06256	1.70096e-05	10.3493	0.000132711
	Grain 1	KNW_03	1.85858e-06	3.27774	3.08406	31.9078	2.4406	2.45217	0.791355	1.90291e-05	1.0628	2.21451e-05	10.346	0.000189236	-0.514687	0.185183	-0.288773	-0.864507
	Grian 4	PZH12-15_04	-7.48514e-06	4.01257	3.77599	39.0766	2.98949	2.99243	0.791708	1.41503e-05	1.06265	1.50918e-05	10.3487	0.000130298
	Grain 1	KNW_04	5.23523e-06	3.31027	3.1146	32.2258	2.46488	2.47668	0.791388	1.85418e-05	1.06282	2.02067e-05	10.3466	0.000172292	-0.394692	0.186518	-0.191879	-0.744554
	Grian 5	PZH12-15_05	1.53257e-05	3.76961	3.54754	36.7119	2.80856	2.81163	0.791694	1.48372e-05	1.0626	1.72212e-05	10.3486	0.000135347
	Grain 1	KNW_05	-2.95609e-06	3.31046	3.11493	32.2274	2.46505	2.47672	0.791359	1.75252e-05	1.06277	2.13515e-05	10.346	0.000169456	-0.451799	0.125285	-0.252632	-0.801641
	Grian 6	PZH12-15_06	-2.2647e-05	3.5938	3.38183	34.9978	2.67753	2.68053	0.79174	1.4377e-05	1.06268	1.63077e-05	10.3488	0.000124263
	Grain 1	KNW_06	1.65227e-05	3.30598	3.11068	32.1844	2.46171	2.47329	0.791366	1.86753e-05	1.06279	2.01439e-05	10.3464	0.00016616	-0.489334	0.143878	-0.245526	-0.839163
	Grian 7	PZH12-15_07	1.11554e-05	3.94251	3.71029	38.398	2.93769	2.94069	0.791767	1.30434e-05	1.06259	1.67373e-05	10.349	0.000133841
	Grain 1	KNW_07	1.75746e-05	3.30813	3.11258	32.2035	2.46308	2.47477	0.791327	1.6855e-05	1.06283	1.82744e-05	10.3462	0.000140983	-0.522716	0.224345	-0.247849	-0.872533
	Grian 8	PZH12-15_08	1.59749e-06	3.86121	3.63375	37.6042	2.8769	2.87986	0.791716	1.32368e-05	1.0626	1.67213e-05	10.3486	0.00012221
	Grain 1	KNW_08	-1.60708e-05	3.32219	3.12575	32.3398	2.47362	2.48514	0.791365	1.73595e-05	1.06285	2.06454e-05	10.3462	0.000170987	-0.450991	0.219527	-0.239083	-0.800833
	Grian 9	PZH12-15_09	9.75383e-06	3.83256	3.60667	37.3249	2.85552	2.85842	0.791729	1.45544e-05	1.06263	1.7124e-05	10.3488	0.000137018
	Grain 1	KNW_09	-9.22738e-06	3.2963	3.10142	32.0874	2.45426	2.46566	0.791329	1.8481e-05	1.06284	2.31039e-05	10.346	0.000167505	-0.471789	0.16081	-0.254148	-0.821624
	Grian 10	PZH12-15_10	1.52863e-05	3.67722	3.46027	35.8083	2.73942	2.74223	0.791677	1.43448e-05	1.0627	1.6956e-05	10.3484	0.000137607
	Grain 1	KNW_10	9.32208e-07	3.25399	3.06163	31.6756	2.42281	2.43401	0.791339	1.87085e-05	1.06283	2.19921e-05	10.3459	0.000192475	-0.415914	0.132949	-0.242203	-0.765769
	Grian 11	PZH12-15_11	1.36259e-05	3.69758	3.4795	36.0074	2.75458	2.75747	0.791659	1.32882e-05	1.06267	1.69236e-05	10.3484	0.000121343
	Grain 1	KNW_11	1.22088e-05	3.2602	3.06744	31.7355	2.42726	2.43853	0.791294	1.7474e-05	1.06284	2.15575e-05	10.3459	0.000181355	-0.451375	0.174696	-0.23572	-0.801217
	Grian 12	PZH12-15_12	-6.88326e-06	3.81979	3.59462	37.198	2.84566	2.84847	0.791643	1.3492e-05	1.06264	1.60412e-05	10.3482	0.000138643
	Grain 1	KNW_12	4.34477e-07	3.28022	3.08627	31.931	2.44228	2.45352	0.791332	1.70033e-05	1.06284	2.05785e-05	10.3461	0.00015938	-0.375424	0.154824	-0.200838	-0.725293
	Grian 13	PZH12-15_13	1.5712e-06	3.78365	3.56038	36.8432	2.81846	2.82105	0.791616	1.3776e-05	1.06271	1.69871e-05	10.3481	0.000141378
	Grain 1	KNW_13	-2.83774e-05	3.25965	3.06687	31.7294	2.42683	2.43805	0.7913	1.92247e-05	1.06286	2.30109e-05	10.3458	0.000175966	-0.439011	0.161629	-0.237853	-0.788858
	Grian 14	PZH12-15_14	-5.91822e-06	3.52817	3.32012	34.3582	2.62847	2.63136	0.791679	1.20472e-05	1.06267	1.61969e-05	10.3485	0.000114843
	Grain 1	KNW_14	3.50575e-06	3.26833	3.07499	31.8145	2.43328	2.4445	0.791306	1.70365e-05	1.06288	1.94538e-05	10.3462	0.000145968	-0.428296	0.213837	-0.199592	-0.778146
	Grian 15	PZH12-15_15	7.47644e-06	3.59605	3.38408	35.0184	2.67888	2.68174	0.791612	1.40896e-05	1.06264	1.61847e-05	10.348	0.000137342
	Grain 1	KNW_15	4.11277e-06	3.20725	3.01742	31.2187	2.38771	2.39875	0.791303	1.77189e-05	1.06291	2.0625e-05	10.3461	0.000161497	-0.448356	0.254451	-0.219563	-0.798199
	Grian 16	PZH12-15_16	-1.5552e-05	3.47368	3.2689	33.8291	2.588	2.59122	0.791704	1.48434e-05	1.06264	1.85067e-05	10.3488	0.000136021
	Grain 1	KNW_16	-2.76848e-05	3.23524	3.04385	31.4918	2.40868	2.41969	0.791323	1.78716e-05	1.06288	2.15735e-05	10.346	0.000170917	-0.457182	0.216898	-0.252758	-0.807022
	Grian 17	PZH12-15_17	7.39361e-06	3.72002	3.50068	36.2268	2.77137	2.77421	0.791666	1.49216e-05	1.06266	1.69996e-05	10.3485	0.000124503
	Grain 1	KNW_17	1.29274e-05	3.20062	3.01132	31.1539	2.38285	2.39383	0.791292	1.7935e-05	1.06286	2.25237e-05	10.3456	0.000162672	-0.450814	0.202028	-0.255649	-0.800657
	Grian 18	PZH12-15_18	7.7942e-06	3.58258	3.3714	34.887	2.66891	2.67151	0.791631	1.63791e-05	1.06264	1.55623e-05	10.3479	0.000124326
	Grain 1	KNW_18	1.38136e-05	3.25562	3.06305	31.6902	2.42389	2.43481	0.791327	1.85265e-05	1.06287	1.87817e-05	10.3459	0.000165048	-0.360488	0.196411	-0.193316	-0.710362
	Grian 19	PZH12-15_19	-6.14132e-06	3.61314	3.40002	35.1831	2.69143	2.69415	0.791593	1.44929e-05	1.06268	1.88186e-05	10.3479	0.000139899
	Grain 1	KNW_19	-1.91139e-06	3.23542	3.04408	31.4938	2.4088	2.41975	0.7913	1.84913e-05	1.06285	1.95154e-05	10.3459	0.000194894	-0.383834	0.155182	-0.201926	-0.7337
	Grian 20	PZH12-15_20	1.18412e-05	3.63498	3.42054	35.3957	2.70774	2.71045	0.791613	1.51691e-05	1.06269	1.80619e-05	10.348	0.000142054
	Grain 1	KNW_20	5.49683e-06	3.18462	2.99627	30.9982	2.37081	2.38253	0.791249	1.80783e-05	1.06286	2.33367e-05	10.3455	0.000178131	-0.36069	0.134983	-0.193565	-0.710564
	Grian 21	PZH12-15_21	-8.42502e-06	3.71378	3.49451	36.158	2.76575	2.76831	0.791455	1.63727e-05	1.06275	1.58206e-05	10.3471	0.000139808
Time	Grain	Sample	44Ca	46Ti	47Ti	48Ti	49Ti	50Ti	49Ti/47Ti	se	46Ti/47Ti	se	48Ti/47Ti	se	δ49/47Ti	δ46/47Ti	δ48/47Ti	To OL-Ti		-0.35
																		δ49/47Ti
2022-02-24	Grian 1	PZH12-15_01	1.11e-06	3.5113	3.30479	34.2039	2.61691	2.61948	0.791852	1.45216e-05	1.06249	1.74253e-05	10.3498	0.000139968
	Grain 1	KNW_01	-7.48818e-06	3.17087	2.98384	30.8742	2.3616	2.37156	0.791463	1.85479e-05	1.06268	2.136e-05	10.3471	0.000170989	-0.512582	0.198524	-0.257699	-0.862403
	Grian 2	PZH12-15_02	1.6823e-05	3.54519	3.33677	34.5349	2.64234	2.64494	0.791885	1.16624e-05	1.06246	1.6324e-05	10.3498	0.000129449
	Grain 1	KNW_02	9.32929e-07	3.17159	2.9844	30.8812	2.36217	2.3721	0.791499	1.88486e-05	1.06273	1.77081e-05	10.3475	0.000181566	-0.470906	0.2547	-0.223752	-0.820741
	Grian 3	PZH12-15_03	1.08393e-05	3.74725	3.52699	36.5039	2.79289	2.79551	0.791858	1.51064e-05	1.06245	1.52968e-05	10.3498	0.000148759
	Grain 1	KNW_03	-4.70713e-06	3.17488	2.98757	30.9117	2.3645	2.37426	0.79144	2.19208e-05	1.0627	2.17935e-05	10.3467	0.000201153	-0.483048	0.19373	-0.273995	-0.832879
	Grian 4	PZH12-15_04	2.362e-05	3.94449	3.71235	38.4202	2.93939	2.94186	0.791786	1.32031e-05	1.06253	1.4947e-05	10.3493	0.000127379
	Grain 1	KNW_04	-1.35571e-05	3.14784	2.96193	30.647	2.34421	2.35394	0.791441	1.87764e-05	1.06277	2.36446e-05	10.3469	0.000175661	-0.443519	0.234822	-0.229514	-0.793363
	Grian 5	PZH12-15_05	-4.66093e-06	3.73472	3.515	36.3779	2.78318	2.78568	0.791799	1.16427e-05	1.06251	1.58806e-05	10.3493	0.000125651
	Grain 1	KNW_05	1.90915e-05	3.16858	2.98153	30.8487	2.35967	2.36936	0.791426	1.71366e-05	1.06274	2.13308e-05	10.3466	0.00017971	-0.46399	0.214497	-0.264978	-0.813828
	Grian 6	PZH12-15_06	1.13587e-05	3.51988	3.3128	34.2852	2.62303	2.62563	0.791787	1.4056e-05	1.06251	1.50996e-05	10.3493	0.00011304
	Grain 1	KNW_06	-1.29247e-05	3.11613	2.93196	30.3347	2.32015	2.32971	0.791326	1.71164e-05	1.06281	2.1485e-05	10.3462	0.000163169	-0.520912	0.247362	-0.267995	-0.87073
	Grian 7	PZH12-15_07	-1.27133e-05	3.91741	3.68666	38.1519	2.9187	2.92107	0.791689	1.33137e-05	1.06259	1.50683e-05	10.3486	0.00012857
	Grain 1	KNW_07	-1.93261e-06	3.15681	2.97026	30.7307	2.35052	2.3601	0.791345	1.88108e-05	1.06281	2.27536e-05	10.3461	0.000192558	-0.486004	0.20775	-0.281125	-0.835834
	Grian 8	PZH12-15_08	-9.52865e-06	3.79898	3.57523	37.0013	2.83077	2.8332	0.79177	1.35919e-05	1.06258	1.47192e-05	10.3493	0.000110335
	Grain 1	KNW_08	-8.11193e-06	3.16715	2.97996	30.8321	2.3582	2.36781	0.79135	1.98345e-05	1.06282	2.2364e-05	10.3464	0.00018418	-0.58628	0.259803	-0.300605	-0.936074
	Grian 9	PZH12-15_09	-9.33942e-06	3.79878	3.57531	37.0037	2.83115	2.83358	0.791858	1.46105e-05	1.0625	1.79177e-05	10.3497	0.000158034
	Grain 1	KNW_09	-4.88073e-06	3.15522	2.96886	30.7165	2.34942	2.35895	0.791348	1.91628e-05	1.06277	1.96377e-05	10.3462	0.000174024	-0.547597	0.205953	-0.299267	-0.897405
	Grian 10	PZH12-15_10	4.71385e-06	3.6733	3.4569	35.7747	2.73685	2.73915	0.791705	1.3772e-05	1.0626	2.03677e-05	10.3488	0.000142504
	Grain 1	KNW_10	3.14567e-06	3.15996	2.97329	30.7621	2.35283	2.36234	0.791318	1.70707e-05	1.06278	2.05842e-05	10.3461	0.000163561	-0.485702	0.176087	-0.252853	-0.835532
	Grian 11	PZH12-15_11	1.49393e-05	3.74648	3.52579	36.4873	2.79137	2.79369	0.791699	1.36163e-05	1.06259	1.67597e-05	10.3487	0.000132251
	Grain 1	KNW_11	5.19756e-06	3.1794	2.99162	30.951	2.3673	2.37693	0.791307	1.80753e-05	1.06277	2.56298e-05	10.3459	0.00019743	-0.481941	0.168758	-0.269548	-0.831772
	Grian 12	PZH12-15_12	-1.30659e-05	3.78542	3.56246	36.8666	2.82033	2.82255	0.791678	1.4032e-05	1.06259	1.67126e-05	10.3486	0.000141747
	Grain 1	KNW_12	8.67685e-06	3.14094	2.95537	30.5762	2.3386	2.34808	0.791302	1.67048e-05	1.06279	1.9534e-05	10.346	0.000167764	-0.536566	0.21128	-0.286792	-0.886378
	Grian 13	PZH12-15_13	-6.17449e-06	3.79404	3.57071	36.9542	2.8272	2.82958	0.791775	1.48066e-05	1.06254	1.61273e-05	10.3493	0.000143359
	Grain 1	KNW_13	3.49086e-07	3.17322	2.98573	30.8901	2.36264	2.3722	0.791306	1.93508e-05	1.0628	2.26474e-05	10.3459	0.000176581	-0.546679	0.22064	-0.303581	-0.896487
	Grian 14	PZH12-15_14	-1.90162e-06	3.52811	3.32033	34.3613	2.62871	2.63105	0.791702	1.5766e-05	1.06258	1.73076e-05	10.3488	0.000140299
	Grain 1	KNW_14	-9.04595e-07	3.14787	2.96172	30.6418	2.34363	2.35298	0.791302	1.81729e-05	1.06285	2.24129e-05	10.3459	0.00019155	-0.494468	0.24817	-0.273133	-0.844295
	Grian 15	PZH12-15_15	2.15081e-06	3.60748	3.39498	35.1337	2.68775	2.69017	0.791684	1.67619e-05	1.06259	1.67845e-05	10.3487	0.000147486
	Grain 1	KNW_15	8.48958e-06	3.15382	2.96742	30.6991	2.34795	2.35739	0.79124	1.77969e-05	1.06282	2.33336e-05	10.3454	0.000166487	-0.617767	0.229849	-0.355654	-0.967551
	Grian 16	PZH12-15_16	-7.94634e-06	3.53145	3.32356	34.3967	2.63151	2.63409	0.791775	1.34633e-05	1.06255	1.31265e-05	10.3494	9.95302e-05
	Grain 1	KNW_16	5.91502e-07	3.15626	2.96962	30.7209	2.3498	2.35921	0.791279	1.55118e-05	1.06285	2.27509e-05	10.345	0.000552926	-0.579387	0.267519	-0.390629	-0.929185
	Grian 17	PZH12-15_17	9.11594e-06	3.65542	3.44013	35.601	2.72356	2.7259	0.791701	1.47848e-05	1.06258	1.82916e-05	10.3487	0.000129385
	Grain 1	KNW_17	-5.07202e-06	3.18236	2.99422	30.9774	2.36927	2.37871	0.791277	1.9621e-05	1.06283	1.8599e-05	10.3457	0.000172528	-0.503893	0.222071	-0.272551	-0.853716
	Grian 18	PZH12-15_18	1.06868e-05	3.66104	3.4453	35.6532	2.72749	2.72966	0.791652	1.29861e-05	1.06262	1.62348e-05	10.3483	0.00012489
	Grain 1	KNW_18	1.95309e-05	3.17965	2.99156	30.9497	2.36712	2.37653	0.791264	1.70609e-05	1.06288	2.11356e-05	10.3457	0.000184706	-0.488755	0.219756	-0.260101	-0.838584
	Grian 19	PZH12-15_19	1.61267e-05	3.83453	3.60839	37.341	2.8566	2.85867	0.791651	1.42094e-05	1.06267	1.64535e-05	10.3484	0.000146712
	Grain 1	KNW_19	-3.50967e-06	3.14458	2.95853	30.6075	2.34098	2.35022	0.79126	1.93727e-05	1.06288	2.32175e-05	10.3455	0.000186647	-0.481206	0.2132	-0.275415	-0.831038
	Grian 20	PZH12-15_20	-2.3877e-05	3.66719	3.45101	35.7122	2.73194	2.73417	0.791632	1.41301e-05	1.06264	1.52666e-05	10.3483	0.000134111
	Grain 1	KNW_20	1.1062e-06	3.15723	2.97053	30.7318	2.35052	2.35983	0.791278	1.86408e-05	1.06285	2.31777e-05	10.3455	0.000171744	-0.48055	0.190074	-0.293603	-0.830382
	Grian 21	PZH12-15_21	6.82878e-06	3.76799	3.54583	36.6952	2.80718	2.80946	0.791686	1.28377e-05	1.06265	1.65078e-05	10.3488	0.000125553
															-0.474386	0.199811	-0.256275	-0.82422
															0.117376	0.0755955	0.083069	0.117334

## Sheet: Alfa-Ti
Time	Grain	Sample	44Ca	46Ti	47Ti	48Ti	49Ti	50Ti	49Ti/47Ti	se	46Ti/47Ti	se	48Ti/47Ti	se	δ49/47Ti	δ46/47Ti	δ48/47Ti	To OL-Ti		-0.35
																		δ49/47Ti
2021-09-06	Same grain	PZH12-15 01	0.000254344	3.07775	2.89612	29.9728	2.29257	2.29169	0.791598	2.02043e-05	1.06271	2.27816e-05	10.3493	0.000170028
	Same grain	Alfa-Ti 01	0.000171413	3.87067	3.64207	37.6865	2.88332	2.88205	0.791673	2.17847e-05	1.06277	2.32961e-05	10.3477	0.00109525	0.0625414	0.0591144	-0.189132	-0.287481
	Same grain	PZH12-15 02	0.00026055	2.99111	2.81464	29.1317	2.22821	2.22761	0.79165	1.8556e-05	1.0627	2.38543e-05	10.35	0.000151601
	Same grain	Alfa-Ti 02	0.000140772	3.86694	3.63875	37.6549	2.88055	2.87842	0.791636	2.06732e-05	1.06271	2.16964e-05	10.3484	0.000371394	-0.0798032	0.070951	-0.174583	-0.429775
	Same grain	PZH12-15 03	0.000213608	3.01823	2.84052	29.4005	2.24897	2.24833	0.791749	1.73211e-05	1.06256	2.07792e-05	10.3504	0.000159152
	Same grain	Alfa-Ti 03	0.000134338	3.58932	3.37797	34.9526	2.67475	2.67385	0.791828	1.98872e-05	1.06256	2.38362e-05	10.3477	0.00142632	0.0921185	-0.022649	-0.275247	-0.257914
	Same grain	PZH12-15 04	0.000253937	2.9233	2.75105	28.4751	2.17817	2.17762	0.79176	1.64028e-05	1.06261	2.28056e-05	10.3506	0.000146568
	Same grain	Alfa-Ti 04	0.000127796	3.47871	3.27417	33.8853	2.59293	2.59226	0.791938	2.04566e-05	1.06247	2.31827e-05	10.3494	0.000963149	0.21173	-0.119668	-0.121281	-0.138344
	Same grain	PZH12-15 05	0.000358497	2.8892	2.71904	28.1442	2.15288	2.15231	0.79178	1.6834e-05	1.06258	2.09727e-05	10.3508	0.000152678
	Same grain	Alfa-Ti 05	0.000136204	3.40094	3.20087	33.1295	2.53482	2.53413	0.791921	2.42152e-05	1.06251	2.48636e-05	10.3503	0.000998086	0.16281	-0.0668279	-0.0576537	-0.187247
	Same grain	PZH12-15 06	0.000232907	2.71634	2.55639	26.461	2.02416	2.02373	0.791804	1.77798e-05	1.06257	2.61742e-05	10.351	0.000155688
	Same grain	Alfa-Ti 06	0.000159371	3.4479	3.2447	33.5806	2.56924	2.56847	0.791829	1.9152e-05	1.06262	2.74777e-05	10.3494	0.000866776	0.0310958	0.0552017	-0.142996	-0.318915
	Same grain	PZH12-15 07	0.000201786	2.66154	2.50484	25.9271	1.98334	1.9829	0.791803	2.0066e-05	1.06256	2.76952e-05	10.3508	0.00020571
	Same grain	Alfa-Ti 07	0.000117989	3.43031	3.22824	33.4058	2.55634	2.55561	0.791871	2.33389e-05	1.06259	2.45223e-05	10.3483	0.00152046	0.0718804	0.039888	-0.261183	-0.278145
	Same grain	PZH12-15 08	0.000868325	2.65978	2.50321	25.911	1.9821	1.98171	0.791825	1.81885e-05	1.06255	2.23496e-05	10.3511	0.00014683
	Same grain	Alfa-Ti 08	0.000120379	3.2706	3.07831	31.8535	2.43765	2.437	0.791885	2.20547e-05	1.06246	2.7095e-05	10.3481	0.00113784	0.0423546	-0.0621783	-0.297383	-0.30766
	Same grain	PZH12-15 09	0.000166029	2.60867	2.4552	25.4143	1.94422	1.94381	0.791879	1.92034e-05	1.06251	2.61922e-05	10.3512	0.000187259
	Same grain	Alfa-Ti 09	0.000100092	3.21561	3.02645	31.3223	2.39677	2.39608	0.791943	1.90135e-05	1.0625	2.37087e-05	10.3496	0.000875347	0.0703767	0.00839322	-0.159084	-0.279648
	Same grain	PZH12-15 10	0.000158627	2.54008	2.3907	24.7468	1.89319	1.89276	0.791897	2.34342e-05	1.06248	2.59008e-05	10.3513	0.000188918
	Same grain	Alfa-Ti 10	0.000125634	3.15314	2.96766	30.7207	2.35045	2.34983	0.792027	2.32116e-05	1.0625	2.55194e-05	10.3519	0.000224423	0.197756	0.0250754	0.0663047	-0.152313
	Same grain	PZH12-15 11	0.000142636	2.49543	2.34873	24.3119	1.85982	1.85948	0.791845	2.27623e-05	1.06246	2.29666e-05	10.3511	0.000197721
	Same grain	Alfa-Ti 11	9.30523e-05	3.19236	3.00444	31.0981	2.37911	2.37842	0.791868	1.90473e-05	1.06254	2.56912e-05	10.3508	0.000288054	-0.00588917	0.0675505	-0.0392249	-0.355887
	Same grain	PZH12-15 12	0.000131834	2.44791	2.30395	23.8489	1.8245	1.8241	0.791902	2.02283e-05	1.06248	2.66586e-05	10.3513	0.000170394
	Same grain	Alfa-Ti 12	0.000108147	3.1423	2.95745	30.6076	2.34183	2.34112	0.791851	2.38496e-05	1.0625	2.61731e-05	10.3495	0.000676479	-0.0644933	-0.00815134	-0.188131	-0.414471
	Same grain	PZH12-15 13	0.00015238	2.40412	2.26263	23.4219	1.79178	1.79146	0.791902	2.19019e-05	1.06254	2.35757e-05	10.3516	0.00017016
	Same grain	Alfa-Ti 13	8.1376e-05	3.04887	2.86955	29.7021	2.27258	2.27196	0.791971	2.04428e-05	1.06249	2.27672e-05	10.3509	0.000583023	0.113913	-0.0448597	-0.0698875	-0.236127
	Same grain	PZH12-15 14	0.000145213	2.40551	2.26393	23.4353	1.79271	1.79248	0.79186	1.98641e-05	1.06254	2.96334e-05	10.3516	0.000174496
	Same grain	Alfa-Ti 14	9.72561e-05	2.93169	2.75943	28.56	2.18547	2.18498	0.792006	2.64161e-05	1.06242	2.77171e-05	10.3502	0.00111742	0.110049	-0.0900855	-0.159707	-0.23999
	Same grain	PZH12-15 15	0.000135373	2.31919	2.18277	22.5965	1.72871	1.72835	0.791977	2.22916e-05	1.0625	2.46732e-05	10.3522	0.000207064
	Same grain	Alfa-Ti 15	9.44307e-05	2.96091	2.78678	28.847	2.20697	2.20645	0.791945	2.30686e-05	1.06248	2.55338e-05	10.3514	0.000274013	-0.0227335	0.0111502	-0.0488453	-0.372726
	Same grain	PZH12-15 16	0.000330259	2.33123	2.19421	22.7137	1.7377	1.73735	0.791948	1.88215e-05	1.06244	2.57726e-05	10.3517	0.000190203
	Same grain	Alfa-Ti 16	0.00010781	2.9424	2.76937	28.6654	2.19309	2.19247	0.791914	2.13045e-05	1.06248	2.69136e-05	10.3509	0.000237416	-0.0290159	-0.021817	-0.0780077	-0.379006
	Same grain	PZH12-15 17	0.00028643	2.29804	2.16275	22.3883	1.71274	1.7124	0.791926	1.87761e-05	1.06256	2.68545e-05	10.3518	0.000196777
	Same grain	Alfa-Ti 17	7.38982e-05	2.85123	2.68359	27.7779	2.12521	2.12469	0.791935	2.17693e-05	1.06246	2.55945e-05	10.3511	0.000224969	-0.00192729	-0.0540989	-0.0677464	-0.351927
	Same grain	PZH12-15 18	0.000151135	2.26897	2.13554	22.1067	1.69123	1.69095	0.791948	1.79131e-05	1.06248	2.70585e-05	10.3518	0.000203005
	Same grain	Alfa-Ti 18	6.77027e-05	2.7323	2.57168	26.6221	2.03674	2.03641	0.791995	2.28576e-05	1.06246	2.35425e-05	10.3521	0.000257799	0.0318018	-0.0244389	0.0170076	-0.318209
	Same grain	PZH12-15 19	0.000144289	2.18477	2.05629	21.2867	1.62856	1.6282	0.791991	2.09859e-05	1.06248	2.75158e-05	10.352	0.000196211
	Same grain	Alfa-Ti 19	8.48015e-05	2.81489	2.64935	27.4203	2.09829	2.09781	0.792004	2.32504e-05	1.06248	2.42046e-05	10.3499	0.00113594	0.0662082	0.0409909	-0.174863	-0.283815
	Same grain	PZH12-15 20	0.000169261	2.21827	2.08799	21.6138	1.6535	1.65325	0.791913	2.17688e-05	1.0624	3.07984e-05	10.3515	0.000207215
	Same grain	Alfa-Ti 20	9.66748e-05	2.78513	2.62134	27.1344	2.07615	2.07572	0.792021	2.12537e-05	1.06248	2.57781e-05	10.3515	0.00082004	0.116845	0.0726615	-0.0188828	-0.233195
	Same grain	PZH12-15 21	0.000217114	2.16056	2.03363	21.052	1.61051	1.61033	0.791944	2.11517e-05	1.06242	2.98643e-05	10.3519	0.000222113
	Same grain	Alfa-Ti 21	7.21155e-05	2.67038	2.51336	26.0174	1.99062	1.9902	0.792018	2.05069e-05	1.06247	2.97e-05	10.3517	0.000282861	0.0696554	0.0415848	-0.0293964	-0.280369
	Same grain	PZH12-15 22	0.000221493	2.10006	1.97665	20.4625	1.56547	1.56526	0.791981	2.04481e-05	1.06243	2.76924e-05	10.3521	0.000201835
	Same grain	Alfa-Ti 22	9.78762e-05	2.64065	2.4854	25.7289	1.96859	1.96829	0.79207	2.37376e-05	1.06246	2.74557e-05	10.3522	0.000548665	0.146148	0.0286723	0.0192873	-0.203904
	Same grain	PZH12-15 23	0.000237233	2.06851	1.94696	20.1547	1.54184	1.54173	0.791926	2.08121e-05	1.06243	2.80398e-05	10.3519	0.000178498
	Same grain	Alfa-Ti 23	8.74146e-05	2.58331	2.43157	25.1692	1.92591	1.9255	0.792051	2.42141e-05	1.0624	2.79435e-05	10.3513	0.000922821	0.0859642	-0.0424087	-0.0918288	-0.264066
	Same grain	PZH12-15 24	0.000132215	2.049	1.92854	19.9653	1.52747	1.52727	0.792039	2.27073e-05	1.06246	2.86074e-05	10.3526	0.00016624
	Same grain	Alfa-Ti 24	8.331e-05	2.58443	2.43252	25.1794	1.92651	1.92616	0.791987	2.3324e-05	1.06244	3.40727e-05	10.3513	0.000401742	-0.065964	-0.00917949	-0.113403	-0.415941
	Same grain	PZH12-15 25	0.00014356	2.03267	1.91321	19.8064	1.51533	1.5151	0.79204	1.95226e-05	1.06244	3.37392e-05	10.3524	0.000207188
	Same grain	Alfa-Ti 25	9.59818e-05	2.57326	2.42186	25.0682	1.91815	1.9177	0.79202	2.21478e-05	1.06251	3.04787e-05	10.3509	0.000695357	0.0288168	0.0583994	-0.095595	-0.321193
	Same grain	PZH12-15 26	9.90013e-05	2.07357	1.95168	20.2027	1.54564	1.54535	0.791955	2.37776e-05	1.06245	2.96308e-05	10.3514	0.000166567
															0.0576895	0.000530821	-0.110058	-0.292331
															0.153551	0.106366	0.182121	0.153497
