# Supplementary material for: In situ Ti isotopic analysis by femtosecond laser ablation MC-ICP-MS
Source: Royal Society of Chemistry journal article supplement (doi:10.1039/d2ja00189f), 2022-01-01
Supplement: d2ja00189f2.xlsx [file d2ja00189f2.xlsx]

## Sheet: PlotDat4
Source sheet	OL-Ti	-0.2	2.31364e-05	-0.1	0	-0.2	0
Plot name	ProbDens3	-0.1998	2.38359e-05	-0.08	0	0.1998	0
Plot Type	16	-0.1996	2.45597e-05	-0.08	1
1st free col	9	-0.1994	2.52997e-05	-0.1	1
Sigma Level	2	-0.1992	2.60607e-05	-0.1	0
Absolute Errs	TRUE	-0.199	2.68476e-05	ErrBox	ErrBox
Symbol Type	1	-0.1988	2.76524e-05	-0.08	0
Inverse Plot	FALSE	-0.1986	2.84799e-05	-0.06	0
Color Plot	TRUE	-0.1984	2.93307e-05	-0.06	5
3D plot	FALSE	-0.1982	3.02054e-05	-0.08	5
Linear	FALSE	-0.198	3.11046e-05	-0.08	0
Data Range	R4:S239	-0.1978	3.20289e-05	ErrBox	ErrBox
Filled Symbols	FALSE	-0.1976	3.2979e-05	-0.06	0
ConcAge	FALSE	-0.1974	3.39555e-05	-0.04	0
ConcSwap	FALSE	-0.1972	3.49592e-05	-0.04	27
1st Symbol-row	1	-0.197	3.59908e-05	-0.06	27
		-0.1968	3.70509e-05	-0.06	0
		-0.1966	3.81403e-05	ErrBox	ErrBox
		-0.1964	3.92598e-05	-0.04	0
		-0.1962	4.04101e-05	-0.02	0
		-0.196	4.15919e-05	-0.02	32
		-0.1958	4.28062e-05	-0.04	32
		-0.1956	4.40537e-05	-0.04	0
		-0.1954	4.53353e-05	ErrBox	ErrBox
		-0.1952	4.66519e-05	-0.02	0
		-0.195	4.80042e-05	-1.73472e-17	0
		-0.1948	4.93933e-05	-1.73472e-17	48
		-0.1946	5.08199e-05	-0.02	48
		-0.1944	5.22852e-05	-0.02	0
		-0.1942	5.37945e-05	ErrBox	ErrBox
		-0.194	5.53401e-05	0	0
		-0.1938	5.69272e-05	0.02	0
		-0.1936	5.85612e-05	0.02	53
		-0.1934	6.02348e-05	0	53
		-0.1932	6.1953e-05	0	0
		-0.193	6.37172e-05	ErrBox	ErrBox
		-0.1928	6.55282e-05	0.02	0
		-0.1926	6.73874e-05	0.04	0
		-0.1924	6.92959e-05	0.04	37
		-0.1922	7.12549e-05	0.02	37
		-0.192	7.32656e-05	0.02	0
		-0.1918	7.53337e-05	ErrBox	ErrBox
		-0.1916	7.74519e-05	0.04	0
		-0.1914	7.96302e-05	0.06	0
		-0.1912	8.18612e-05	0.06	18
		-0.191	8.41505e-05	0.04	18
		-0.1908	8.64996e-05	0.04	0
		-0.1906	8.89099e-05	ErrBox	ErrBox
		-0.1904	9.13828e-05	0.06	0
		-0.1902	9.39198e-05	0.08	0
		-0.19	9.65225e-05	0.08	5
		-0.1898	9.91925e-05	0.06	5
		-0.1896	0.000101931	0.06	0
		-0.1894	0.000104741	ErrBox	ErrBox
		-0.1892	0.000107622	0.08	0
		-0.189	0.000110582	0.1	0
		-0.1888	0.000113613	0.1	4
		-0.1886	0.000116721	0.08	4
		-0.1884	0.000119913	0.08	0
		-0.1882	0.000123187	ErrBox	ErrBox
		-0.188	0.000126539
		-0.1878	0.000129975
		-0.1876	0.000133499
		-0.1874	0.000137112
		-0.1872	0.000140815
		-0.187	0.000144612
		-0.1868	0.000148503
		-0.1866	0.000152492
		-0.1864	0.000156585
		-0.1862	0.000160776
		-0.186	0.00016507
		-0.1858	0.000169472
		-0.1856	0.000173982
		-0.1854	0.000178608
		-0.1852	0.000183344
		-0.185	0.000188196
		-0.1848	0.000193172
		-0.1846	0.000198265
		-0.1844	0.000203488
		-0.1842	0.000208833
		-0.184	0.000214309
		-0.1838	0.000219918
		-0.1836	0.000225663
		-0.1834	0.000231547
		-0.1832	0.000237573
		-0.183	0.000243745
		-0.1828	0.000250064
		-0.1826	0.000256536
		-0.1824	0.000263163
		-0.1822	0.000269948
		-0.182	0.000276899
		-0.1818	0.000284011
		-0.1816	0.000291293
		-0.1814	0.000298747
		-0.1812	0.000306377
		-0.181	0.000314192
		-0.1808	0.000322187
		-0.1806	0.000330375
		-0.1804	0.000338754
		-0.1802	0.00034733
		-0.18	0.000356102
		-0.1798	0.000365079
		-0.1796	0.000374264
		-0.1794	0.000383672
		-0.1792	0.00039329
		-0.179	0.000403129
		-0.1788	0.000413196
		-0.1786	0.000423495
		-0.1784	0.00043403
		-0.1782	0.000444812
		-0.178	0.000455845
		-0.1778	0.000467121
		-0.1776	0.000478655
		-0.1774	0.000490455
		-0.1772	0.000502519
		-0.177	0.000514856
		-0.1768	0.000527486
		-0.1766	0.000540396
		-0.1764	0.000553588
		-0.1762	0.000567077
		-0.176	0.000580869
		-0.1758	0.000594969
		-0.1756	0.000609384
		-0.1754	0.000624125
		-0.1752	0.000639189
		-0.175	0.000654588
		-0.1748	0.000670328
		-0.1746	0.000686415
		-0.1744	0.000702858
		-0.1742	0.000719667
		-0.174	0.000736846
		-0.1738	0.000754396
		-0.1736	0.000772331
		-0.1734	0.000790662
		-0.1732	0.000809388
		-0.173	0.000828521
		-0.1728	0.000848069
		-0.1726	0.000868045
		-0.1724	0.000888449
		-0.1722	0.000909292
		-0.172	0.000930584
		-0.1718	0.000952334
		-0.1716	0.000974554
		-0.1714	0.000997246
		-0.1712	0.00102042
		-0.171	0.00104409
		-0.1708	0.00106826
		-0.1706	0.00109295
		-0.1704	0.00111816
		-0.1702	0.0011439
		-0.17	0.00117019
		-0.1698	0.00119703
		-0.1696	0.00122443
		-0.1694	0.00125241
		-0.1692	0.00128097
		-0.169	0.00131014
		-0.1688	0.0013399
		-0.1686	0.00137029
		-0.1684	0.00140131
		-0.1682	0.00143297
		-0.168	0.00146529
		-0.1678	0.00149826
		-0.1676	0.00153192
		-0.1674	0.00156627
		-0.1672	0.00160133
		-0.167	0.0016371
		-0.1668	0.0016736
		-0.1666	0.00171085
		-0.1664	0.00174885
		-0.1662	0.00178763
		-0.166	0.00182719
		-0.1658	0.00186755
		-0.1656	0.00190873
		-0.1654	0.00195074
		-0.1652	0.0019936
		-0.165	0.00203731
		-0.1648	0.0020819
		-0.1646	0.00212737
		-0.1644	0.00217376
		-0.1642	0.00222107
		-0.164	0.00226932
		-0.1638	0.00231853
		-0.1636	0.00236871
		-0.1634	0.00241989
		-0.1632	0.00247207
		-0.163	0.00252528
		-0.1628	0.00257954
		-0.1626	0.00263485
		-0.1624	0.00269126
		-0.1622	0.00274876
		-0.162	0.00280739
		-0.1618	0.00286715
		-0.1616	0.00292808
		-0.1614	0.00299019
		-0.1612	0.0030535
		-0.161	0.00311803
		-0.1608	0.00318381
		-0.1606	0.00325086
		-0.1604	0.00331919
		-0.1602	0.00338884
		-0.16	0.00345981
		-0.1598	0.00353214
		-0.1596	0.00360585
		-0.1594	0.00368096
		-0.1592	0.0037575
		-0.159	0.00383549
		-0.1588	0.00391495
		-0.1586	0.00399592
		-0.1584	0.00407842
		-0.1582	0.00416247
		-0.158	0.00424809
		-0.1578	0.00433532
		-0.1576	0.00442419
		-0.1574	0.00451472
		-0.1572	0.00460694
		-0.157	0.00470087
		-0.1568	0.00479655
		-0.1566	0.004894
		-0.1564	0.00499326
		-0.1562	0.00509435
		-0.156	0.00519732
		-0.1558	0.00530218
		-0.1556	0.00540897
		-0.1554	0.00551772
		-0.1552	0.00562847
		-0.155	0.00574124
		-0.1548	0.00585606
		-0.1546	0.005973
		-0.1544	0.00609205
		-0.1542	0.00621327
		-0.154	0.00633669
		-0.1538	0.00646234
		-0.1536	0.00659026
		-0.1534	0.00672049
		-0.1532	0.00685307
		-0.153	0.00698804
		-0.1528	0.00712544
		-0.1526	0.00726529
		-0.1524	0.00740765
		-0.1522	0.00755255
		-0.152	0.00770004
		-0.1518	0.00785015
		-0.1516	0.00800293
		-0.1514	0.00815843
		-0.1512	0.00831668
		-0.151	0.00847773
		-0.1508	0.00864163
		-0.1506	0.00880842
		-0.1504	0.00897815
		-0.1502	0.00915086
		-0.15	0.00932661
		-0.1498	0.00950544
		-0.1496	0.00968739
		-0.1494	0.00987252
		-0.1492	0.0100609
		-0.149	0.0102525
		-0.1488	0.0104475
		-0.1486	0.0106459
		-0.1484	0.0108477
		-0.1482	0.011053
		-0.148	0.0112618
		-0.1478	0.0114743
		-0.1476	0.0116904
		-0.1474	0.0119102
		-0.1472	0.0121338
		-0.147	0.0123612
		-0.1468	0.0125926
		-0.1466	0.0128278
		-0.1464	0.0130671
		-0.1462	0.0133105
		-0.146	0.013558
		-0.1458	0.0138098
		-0.1456	0.0140657
		-0.1454	0.0143261
		-0.1452	0.0145908
		-0.145	0.01486
		-0.1448	0.0151338
		-0.1446	0.0154121
		-0.1444	0.0156952
		-0.1442	0.0159829
		-0.144	0.0162756
		-0.1438	0.0165731
		-0.1436	0.0168756
		-0.1434	0.0171831
		-0.1432	0.0174958
		-0.143	0.0178136
		-0.1428	0.0181368
		-0.1426	0.0184653
		-0.1424	0.0187992
		-0.1422	0.0191387
		-0.142	0.0194838
		-0.1418	0.0198346
		-0.1416	0.0201911
		-0.1414	0.0205535
		-0.1412	0.0209219
		-0.141	0.0212963
		-0.1408	0.0216769
		-0.1406	0.0220636
		-0.1404	0.0224567
		-0.1402	0.0228562
		-0.14	0.0232622
		-0.1398	0.0236748
		-0.1396	0.0240941
		-0.1394	0.0245202
		-0.1392	0.0249532
		-0.139	0.0253932
		-0.1388	0.0258404
		-0.1386	0.0262947
		-0.1384	0.0267563
		-0.1382	0.0272253
		-0.138	0.0277019
		-0.1378	0.0281861
		-0.1376	0.0286781
		-0.1374	0.0291779
		-0.1372	0.0296857
		-0.137	0.0302016
		-0.1368	0.0307257
		-0.1366	0.0312581
		-0.1364	0.031799
		-0.1362	0.0323484
		-0.136	0.0329065
		-0.1358	0.0334735
		-0.1356	0.0340494
		-0.1354	0.0346344
		-0.1352	0.0352285
		-0.135	0.035832
		-0.1348	0.036445
		-0.1346	0.0370675
		-0.1344	0.0376998
		-0.1342	0.038342
		-0.134	0.0389942
		-0.1338	0.0396565
		-0.1336	0.0403291
		-0.1334	0.0410122
		-0.1332	0.0417059
		-0.133	0.0424103
		-0.1328	0.0431255
		-0.1326	0.0438519
		-0.1324	0.0445894
		-0.1322	0.0453382
		-0.132	0.0460986
		-0.1318	0.0468706
		-0.1316	0.0476544
		-0.1314	0.0484503
		-0.1312	0.0492583
		-0.131	0.0500786
		-0.1308	0.0509114
		-0.1306	0.0517568
		-0.1304	0.0526151
		-0.1302	0.0534864
		-0.13	0.0543708
		-0.1298	0.0552687
		-0.1296	0.05618
		-0.1294	0.0571051
		-0.1292	0.0580441
		-0.129	0.0589972
		-0.1288	0.0599646
		-0.1286	0.0609465
		-0.1284	0.061943
		-0.1282	0.0629544
		-0.128	0.0639809
		-0.1278	0.0650226
		-0.1276	0.0660798
		-0.1274	0.0671526
		-0.1272	0.0682414
		-0.127	0.0693462
		-0.1268	0.0704673
		-0.1266	0.071605
		-0.1264	0.0727593
		-0.1262	0.0739306
		-0.126	0.0751191
		-0.1258	0.0763249
		-0.1256	0.0775484
		-0.1254	0.0787897
		-0.1252	0.080049
		-0.125	0.0813267
		-0.1248	0.0826229
		-0.1246	0.0839379
		-0.1244	0.0852718
		-0.1242	0.0866251
		-0.124	0.0879978
		-0.1238	0.0893902
		-0.1236	0.0908027
		-0.1234	0.0922354
		-0.1232	0.0936886
		-0.123	0.0951625
		-0.1228	0.0966575
		-0.1226	0.0981737
		-0.1224	0.0997115
		-0.1222	0.101271
		-0.122	0.102853
		-0.1218	0.104457
		-0.1216	0.106083
		-0.1214	0.107733
		-0.1212	0.109405
		-0.121	0.111102
		-0.1208	0.112821
		-0.1206	0.114565
		-0.1204	0.116333
		-0.1202	0.118126
		-0.12	0.119944
		-0.1198	0.121787
		-0.1196	0.123655
		-0.1194	0.125549
		-0.1192	0.12747
		-0.119	0.129417
		-0.1188	0.13139
		-0.1186	0.133391
		-0.1184	0.135418
		-0.1182	0.137474
		-0.118	0.139558
		-0.1178	0.141669
		-0.1176	0.14381
		-0.1174	0.145979
		-0.1172	0.148178
		-0.117	0.150407
		-0.1168	0.152665
		-0.1166	0.154954
		-0.1164	0.157273
		-0.1162	0.159624
		-0.116	0.162006
		-0.1158	0.164419
		-0.1156	0.166865
		-0.1154	0.169343
		-0.1152	0.171854
		-0.115	0.174398
		-0.1148	0.176975
		-0.1146	0.179587
		-0.1144	0.182232
		-0.1142	0.184912
		-0.114	0.187628
		-0.1138	0.190378
		-0.1136	0.193165
		-0.1134	0.195987
		-0.1132	0.198846
		-0.113	0.201742
		-0.1128	0.204675
		-0.1126	0.207646
		-0.1124	0.210655
		-0.1122	0.213703
		-0.112	0.216789
		-0.1118	0.219915
		-0.1116	0.223081
		-0.1114	0.226286
		-0.1112	0.229532
		-0.111	0.232819
		-0.1108	0.236148
		-0.1106	0.239518
		-0.1104	0.242931
		-0.1102	0.246386
		-0.11	0.249884
		-0.1098	0.253425
		-0.1096	0.257011
		-0.1094	0.260641
		-0.1092	0.264315
		-0.109	0.268035
		-0.1088	0.271801
		-0.1086	0.275612
		-0.1084	0.279471
		-0.1082	0.283376
		-0.108	0.287328
		-0.1078	0.291329
		-0.1076	0.295378
		-0.1074	0.299476
		-0.1072	0.303623
		-0.107	0.307819
		-0.1068	0.312066
		-0.1066	0.316364
		-0.1064	0.320713
		-0.1062	0.325113
		-0.106	0.329566
		-0.1058	0.334071
		-0.1056	0.338629
		-0.1054	0.34324
		-0.1052	0.347906
		-0.105	0.352626
		-0.1048	0.357401
		-0.1046	0.362231
		-0.1044	0.367117
		-0.1042	0.37206
		-0.104	0.377059
		-0.1038	0.382116
		-0.1036	0.387231
		-0.1034	0.392404
		-0.1032	0.397636
		-0.103	0.402927
		-0.1028	0.408278
		-0.1026	0.41369
		-0.1024	0.419162
		-0.1022	0.424696
		-0.102	0.430291
		-0.1018	0.435949
		-0.1016	0.44167
		-0.1014	0.447454
		-0.1012	0.453302
		-0.101	0.459214
		-0.1008	0.465191
		-0.1006	0.471234
		-0.1004	0.477342
		-0.1002	0.483517
		-0.1	0.489759
		-0.0998	0.496068
		-0.0996	0.502445
		-0.0994	0.50889
		-0.0992	0.515405
		-0.099	0.521989
		-0.0988	0.528643
		-0.0986	0.535367
		-0.0984	0.542162
		-0.0982	0.549029
		-0.098	0.555968
		-0.0978	0.562979
		-0.0976	0.570064
		-0.0974	0.577222
		-0.0972	0.584454
		-0.097	0.591761
		-0.0968	0.599142
		-0.0966	0.6066
		-0.0964	0.614133
		-0.0962	0.621743
		-0.096	0.62943
		-0.0958	0.637195
		-0.0956	0.645038
		-0.0954	0.652959
		-0.0952	0.66096
		-0.095	0.66904
		-0.0948	0.6772
		-0.0946	0.685441
		-0.0944	0.693763
		-0.0942	0.702167
		-0.094	0.710653
		-0.0938	0.719221
		-0.0936	0.727873
		-0.0934	0.736608
		-0.0932	0.745427
		-0.093	0.75433
		-0.0928	0.763319
		-0.0926	0.772393
		-0.0924	0.781553
		-0.0922	0.790799
		-0.092	0.800133
		-0.0918	0.809554
		-0.0916	0.819062
		-0.0914	0.828659
		-0.0912	0.838345
		-0.091	0.84812
		-0.0908	0.857984
		-0.0906	0.867939
		-0.0904	0.877984
		-0.0902	0.88812
		-0.09	0.898348
		-0.0898	0.908668
		-0.0896	0.919079
		-0.0894	0.929584
		-0.0892	0.940182
		-0.089	0.950873
		-0.0888	0.961658
		-0.0886	0.972538
		-0.0884	0.983512
		-0.0882	0.994582
		-0.088	1.00575
		-0.0878	1.01701
		-0.0876	1.02837
		-0.0874	1.03982
		-0.0872	1.05137
		-0.087	1.06302
		-0.0868	1.07477
		-0.0866	1.08661
		-0.0864	1.09855
		-0.0862	1.1106
		-0.086	1.12274
		-0.0858	1.13498
		-0.0856	1.14732
		-0.0854	1.15976
		-0.0852	1.1723
		-0.085	1.18495
		-0.0848	1.19769
		-0.0846	1.21053
		-0.0844	1.22348
		-0.0842	1.23653
		-0.084	1.24968
		-0.0838	1.26293
		-0.0836	1.27629
		-0.0834	1.28975
		-0.0832	1.30331
		-0.083	1.31698
		-0.0828	1.33075
		-0.0826	1.34462
		-0.0824	1.3586
		-0.0822	1.37268
		-0.082	1.38687
		-0.0818	1.40116
		-0.0816	1.41556
		-0.0814	1.43006
		-0.0812	1.44467
		-0.081	1.45938
		-0.0808	1.4742
		-0.0806	1.48913
		-0.0804	1.50416
		-0.0802	1.51929
		-0.08	1.53453
		-0.0798	1.54988
		-0.0796	1.56534
		-0.0794	1.5809
		-0.0792	1.59657
		-0.079	1.61234
		-0.0788	1.62822
		-0.0786	1.64421
		-0.0784	1.6603
		-0.0782	1.6765
		-0.078	1.69281
		-0.0778	1.70923
		-0.0776	1.72575
		-0.0774	1.74237
		-0.0772	1.75911
		-0.077	1.77595
		-0.0768	1.7929
		-0.0766	1.80995
		-0.0764	1.82711
		-0.0762	1.84438
		-0.076	1.86175
		-0.0758	1.87923
		-0.0756	1.89682
		-0.0754	1.91451
		-0.0752	1.9323
		-0.075	1.95021
		-0.0748	1.96822
		-0.0746	1.98633
		-0.0744	2.00455
		-0.0742	2.02287
		-0.074	2.0413
		-0.0738	2.05983
		-0.0736	2.07847
		-0.0734	2.09721
		-0.0732	2.11606
		-0.073	2.13501
		-0.0728	2.15406
		-0.0726	2.17322
		-0.0724	2.19248
		-0.0722	2.21184
		-0.072	2.2313
		-0.0718	2.25087
		-0.0716	2.27053
		-0.0714	2.2903
		-0.0712	2.31017
		-0.071	2.33014
		-0.0708	2.35021
		-0.0706	2.37038
		-0.0704	2.39065
		-0.0702	2.41102
		-0.07	2.43148
		-0.0698	2.45205
		-0.0696	2.47271
		-0.0694	2.49347
		-0.0692	2.51432
		-0.069	2.53527
		-0.0688	2.55632
		-0.0686	2.57746
		-0.0684	2.5987
		-0.0682	2.62003
		-0.068	2.64146
		-0.0678	2.66298
		-0.0676	2.68459
		-0.0674	2.70629
		-0.0672	2.72809
		-0.067	2.74997
		-0.0668	2.77195
		-0.0666	2.79401
		-0.0664	2.81617
		-0.0662	2.83841
		-0.066	2.86074
		-0.0658	2.88316
		-0.0656	2.90566
		-0.0654	2.92825
		-0.0652	2.95093
		-0.065	2.97368
		-0.0648	2.99653
		-0.0646	3.01945
		-0.0644	3.04246
		-0.0642	3.06555
		-0.064	3.08872
		-0.0638	3.11197
		-0.0636	3.1353
		-0.0634	3.15871
		-0.0632	3.1822
		-0.063	3.20576
		-0.0628	3.2294
		-0.0626	3.25312
		-0.0624	3.27691
		-0.0622	3.30077
		-0.062	3.32471
		-0.0618	3.34871
		-0.0616	3.3728
		-0.0614	3.39695
		-0.0612	3.42117
		-0.061	3.44546
		-0.0608	3.46981
		-0.0606	3.49424
		-0.0604	3.51873
		-0.0602	3.54328
		-0.06	3.5679
		-0.0598	3.59259
		-0.0596	3.61733
		-0.0594	3.64214
		-0.0592	3.66701
		-0.059	3.69194
		-0.0588	3.71693
		-0.0586	3.74197
		-0.0584	3.76708
		-0.0582	3.79223
		-0.058	3.81745
		-0.0578	3.84272
		-0.0576	3.86804
		-0.0574	3.89341
		-0.0572	3.91884
		-0.057	3.94431
		-0.0568	3.96984
		-0.0566	3.99541
		-0.0564	4.02103
		-0.0562	4.0467
		-0.056	4.07241
		-0.0558	4.09817
		-0.0556	4.12397
		-0.0554	4.14981
		-0.0552	4.17569
		-0.055	4.20162
		-0.0548	4.22758
		-0.0546	4.25359
		-0.0544	4.27963
		-0.0542	4.3057
		-0.054	4.33181
		-0.0538	4.35796
		-0.0536	4.38414
		-0.0534	4.41035
		-0.0532	4.43659
		-0.053	4.46286
		-0.0528	4.48917
		-0.0526	4.5155
		-0.0524	4.54185
		-0.0522	4.56824
		-0.052	4.59464
		-0.0518	4.62108
		-0.0516	4.64753
		-0.0514	4.67401
		-0.0512	4.70051
		-0.051	4.72702
		-0.0508	4.75356
		-0.0506	4.78011
		-0.0504	4.80668
		-0.0502	4.83327
		-0.05	4.85987
		-0.0498	4.88649
		-0.0496	4.91311
		-0.0494	4.93975
		-0.0492	4.9664
		-0.049	4.99306
		-0.0488	5.01973
		-0.0486	5.0464
		-0.0484	5.07308
		-0.0482	5.09977
		-0.048	5.12646
		-0.0478	5.15316
		-0.0476	5.17985
		-0.0474	5.20655
		-0.0472	5.23325
		-0.047	5.25994
		-0.0468	5.28664
		-0.0466	5.31333
		-0.0464	5.34002
		-0.0462	5.3667
		-0.046	5.39338
		-0.0458	5.42005
		-0.0456	5.44671
		-0.0454	5.47336
		-0.0452	5.50001
		-0.045	5.52664
		-0.0448	5.55326
		-0.0446	5.57987
		-0.0444	5.60646
		-0.0442	5.63304
		-0.044	5.6596
		-0.0438	5.68614
		-0.0436	5.71267
		-0.0434	5.73918
		-0.0432	5.76567
		-0.043	5.79214
		-0.0428	5.81858
		-0.0426	5.845
		-0.0424	5.8714
		-0.0422	5.89778
		-0.042	5.92412
		-0.0418	5.95044
		-0.0416	5.97674
		-0.0414	6.003
		-0.0412	6.02924
		-0.041	6.05544
		-0.0408	6.08161
		-0.0406	6.10775
		-0.0404	6.13386
		-0.0402	6.15993
		-0.04	6.18597
		-0.0398	6.21197
		-0.0396	6.23793
		-0.0394	6.26385
		-0.0392	6.28974
		-0.039	6.31558
		-0.0388	6.34138
		-0.0386	6.36714
		-0.0384	6.39286
		-0.0382	6.41854
		-0.038	6.44416
		-0.0378	6.46975
		-0.0376	6.49528
		-0.0374	6.52077
		-0.0372	6.54621
		-0.037	6.5716
		-0.0368	6.59694
		-0.0366	6.62223
		-0.0364	6.64746
		-0.0362	6.67265
		-0.036	6.69777
		-0.0358	6.72285
		-0.0356	6.74786
		-0.0354	6.77282
		-0.0352	6.79773
		-0.035	6.82257
		-0.0348	6.84735
		-0.0346	6.87207
		-0.0344	6.89673
		-0.0342	6.92133
		-0.034	6.94587
		-0.0338	6.97034
		-0.0336	6.99474
		-0.0334	7.01908
		-0.0332	7.04335
		-0.033	7.06755
		-0.0328	7.09169
		-0.0326	7.11575
		-0.0324	7.13975
		-0.0322	7.16367
		-0.032	7.18752
		-0.0318	7.21129
		-0.0316	7.235
		-0.0314	7.25862
		-0.0312	7.28217
		-0.031	7.30564
		-0.0308	7.32904
		-0.0306	7.35235
		-0.0304	7.37559
		-0.0302	7.39874
		-0.03	7.42182
		-0.0298	7.44481
		-0.0296	7.46771
		-0.0294	7.49053
		-0.0292	7.51327
		-0.029	7.53592
		-0.0288	7.55848
		-0.0286	7.58096
		-0.0284	7.60334
		-0.0282	7.62564
		-0.028	7.64784
		-0.0278	7.66996
		-0.0276	7.69198
		-0.0274	7.7139
		-0.0272	7.73573
		-0.027	7.75747
		-0.0268	7.77911
		-0.0266	7.80065
		-0.0264	7.8221
		-0.0262	7.84344
		-0.026	7.86468
		-0.0258	7.88583
		-0.0256	7.90687
		-0.0254	7.92781
		-0.0252	7.94864
		-0.025	7.96937
		-0.0248	7.99
		-0.0246	8.01051
		-0.0244	8.03092
		-0.0242	8.05122
		-0.024	8.07142
		-0.0238	8.0915
		-0.0236	8.11147
		-0.0234	8.13133
		-0.0232	8.15107
		-0.023	8.1707
		-0.0228	8.19022
		-0.0226	8.20962
		-0.0224	8.2289
		-0.0222	8.24807
		-0.022	8.26712
		-0.0218	8.28604
		-0.0216	8.30485
		-0.0214	8.32354
		-0.0212	8.3421
		-0.021	8.36054
		-0.0208	8.37885
		-0.0206	8.39704
		-0.0204	8.41511
		-0.0202	8.43305
		-0.02	8.45086
		-0.0198	8.46854
		-0.0196	8.48609
		-0.0194	8.50351
		-0.0192	8.5208
		-0.019	8.53795
		-0.0188	8.55498
		-0.0186	8.57187
		-0.0184	8.58862
		-0.0182	8.60524
		-0.018	8.62172
		-0.0178	8.63806
		-0.0176	8.65426
		-0.0174	8.67033
		-0.0172	8.68625
		-0.017	8.70203
		-0.0168	8.71767
		-0.0166	8.73317
		-0.0164	8.74852
		-0.0162	8.76373
		-0.016	8.77879
		-0.0158	8.7937
		-0.0156	8.80847
		-0.0154	8.82308
		-0.0152	8.83755
		-0.015	8.85187
		-0.0148	8.86604
		-0.0146	8.88005
		-0.0144	8.89391
		-0.0142	8.90762
		-0.014	8.92117
		-0.0138	8.93457
		-0.0136	8.94781
		-0.0134	8.9609
		-0.0132	8.97382
		-0.013	8.98659
		-0.0128	8.9992
		-0.0126	9.01164
		-0.0124	9.02393
		-0.0122	9.03605
		-0.012	9.04801
		-0.0118	9.05981
		-0.0116	9.07144
		-0.0114	9.08291
		-0.0112	9.09421
		-0.011	9.10534
		-0.0108	9.11631
		-0.0106	9.12711
		-0.0104	9.13774
		-0.0102	9.14819
		-0.01	9.15848
		-0.0098	9.1686
		-0.0096	9.17854
		-0.0094	9.18831
		-0.0092	9.19791
		-0.009	9.20733
		-0.0088	9.21658
		-0.0086	9.22565
		-0.0084	9.23455
		-0.0082	9.24327
		-0.008	9.25181
		-0.0078	9.26017
		-0.0076	9.26835
		-0.0074	9.27635
		-0.0072	9.28417
		-0.007	9.29181
		-0.0068	9.29927
		-0.0066	9.30655
		-0.0064	9.31364
		-0.0062	9.32055
		-0.006	9.32727
		-0.0058	9.33381
		-0.0056	9.34017
		-0.0054	9.34634
		-0.0052	9.35232
		-0.005	9.35811
		-0.0048	9.36372
		-0.0046	9.36913
		-0.0044	9.37436
		-0.0042	9.3794
		-0.004	9.38425
		-0.0038	9.38891
		-0.0036	9.39337
		-0.0034	9.39765
		-0.0032	9.40173
		-0.003	9.40562
		-0.0028	9.40932
		-0.0026	9.41283
		-0.0024	9.41614
		-0.0022	9.41925
		-0.002	9.42218
		-0.0018	9.4249
		-0.0016	9.42743
		-0.0014	9.42977
		-0.0012	9.43191
		-0.001	9.43385
		-0.0008	9.4356
		-0.0006	9.43714
		-0.0004	9.43849
		-0.0002	9.43965
		-1.51788e-18	9.4406
		0.0002	9.44136
		0.0004	9.44191
		0.0006	9.44227
		0.0008	9.44243
		0.001	9.44238
		0.0012	9.44214
		0.0014	9.4417
		0.0016	9.44106
		0.0018	9.44021
		0.002	9.43917
		0.0022	9.43792
		0.0024	9.43648
		0.0026	9.43483
		0.0028	9.43298
		0.003	9.43093
		0.0032	9.42868
		0.0034	9.42622
		0.0036	9.42356
		0.0038	9.4207
		0.004	9.41764
		0.0042	9.41438
		0.0044	9.41091
		0.0046	9.40725
		0.0048	9.40337
		0.005	9.3993
		0.0052	9.39503
		0.0054	9.39055
		0.0056	9.38587
		0.0058	9.38099
		0.006	9.3759
		0.0062	9.37062
		0.0064	9.36513
		0.0066	9.35944
		0.0068	9.35354
		0.007	9.34745
		0.0072	9.34115
		0.0074	9.33465
		0.0076	9.32796
		0.0078	9.32105
		0.008	9.31395
		0.0082	9.30665
		0.0084	9.29915
		0.0086	9.29145
		0.0088	9.28354
		0.009	9.27544
		0.0092	9.26714
		0.0094	9.25863
		0.0096	9.24993
		0.0098	9.24103
		0.01	9.23193
		0.0102	9.22264
		0.0104	9.21314
		0.0106	9.20345
		0.0108	9.19356
		0.011	9.18347
		0.0112	9.17319
		0.0114	9.16271
		0.0116	9.15204
		0.0118	9.14117
		0.012	9.13011
		0.0122	9.11885
		0.0124	9.1074
		0.0126	9.09575
		0.0128	9.08392
		0.013	9.07189
		0.0132	9.05967
		0.0134	9.04725
		0.0136	9.03465
		0.0138	9.02186
		0.014	9.00887
		0.0142	8.9957
		0.0144	8.98234
		0.0146	8.96879
		0.0148	8.95506
		0.015	8.94114
		0.0152	8.92703
		0.0154	8.91274
		0.0156	8.89826
		0.0158	8.8836
		0.016	8.86876
		0.0162	8.85373
		0.0164	8.83852
		0.0166	8.82314
		0.0168	8.80757
		0.017	8.79182
		0.0172	8.77589
		0.0174	8.75979
		0.0176	8.7435
		0.0178	8.72705
		0.018	8.71041
		0.0182	8.6936
		0.0184	8.67662
		0.0186	8.65947
		0.0188	8.64214
		0.019	8.62464
		0.0192	8.60697
		0.0194	8.58914
		0.0196	8.57113
		0.0198	8.55296
		0.02	8.53461
		0.0202	8.51611
		0.0204	8.49744
		0.0206	8.4786
		0.0208	8.4596
		0.021	8.44044
		0.0212	8.42112
		0.0214	8.40164
		0.0216	8.382
		0.0218	8.36221
		0.022	8.34225
		0.0222	8.32214
		0.0224	8.30188
		0.0226	8.28146
		0.0228	8.26089
		0.023	8.24017
		0.0232	8.2193
		0.0234	8.19828
		0.0236	8.17711
		0.0238	8.1558
		0.024	8.13434
		0.0242	8.11273
		0.0244	8.09098
		0.0246	8.06909
		0.0248	8.04706
		0.025	8.02488
		0.0252	8.00257
		0.0254	7.98012
		0.0256	7.95754
		0.0258	7.93482
		0.026	7.91196
		0.0262	7.88898
		0.0264	7.86586
		0.0266	7.84261
		0.0268	7.81924
		0.027	7.79573
		0.0272	7.7721
		0.0274	7.74835
		0.0276	7.72447
		0.0278	7.70047
		0.028	7.67635
		0.0282	7.65211
		0.0284	7.62775
		0.0286	7.60327
		0.0288	7.57868
		0.029	7.55397
		0.0292	7.52915
		0.0294	7.50422
		0.0296	7.47918
		0.0298	7.45403
		0.03	7.42878
		0.0302	7.40342
		0.0304	7.37795
		0.0306	7.35238
		0.0308	7.32671
		0.031	7.30094
		0.0312	7.27507
		0.0314	7.2491
		0.0316	7.22304
		0.0318	7.19688
		0.032	7.17063
		0.0322	7.14429
		0.0324	7.11786
		0.0326	7.09134
		0.0328	7.06473
		0.033	7.03804
		0.0332	7.01127
		0.0334	6.98441
		0.0336	6.95747
		0.0338	6.93045
		0.034	6.90335
		0.0342	6.87618
		0.0344	6.84894
		0.0346	6.82162
		0.0348	6.79422
		0.035	6.76676
		0.0352	6.73923
		0.0354	6.71163
		0.0356	6.68397
		0.0358	6.65624
		0.036	6.62846
		0.0362	6.60061
		0.0364	6.5727
		0.0366	6.54473
		0.0368	6.51671
		0.037	6.48863
		0.0372	6.4605
		0.0374	6.43232
		0.0376	6.40409
		0.0378	6.37582
		0.038	6.34749
		0.0382	6.31912
		0.0384	6.29071
		0.0386	6.26226
		0.0388	6.23376
		0.039	6.20523
		0.0392	6.17666
		0.0394	6.14806
		0.0396	6.11942
		0.0398	6.09075
		0.04	6.06205
		0.0402	6.03333
		0.0404	6.00457
		0.0406	5.97579
		0.0408	5.94699
		0.041	5.91816
		0.0412	5.88931
		0.0414	5.86045
		0.0416	5.83157
		0.0418	5.80267
		0.042	5.77375
		0.0422	5.74483
		0.0424	5.71589
		0.0426	5.68695
		0.0428	5.65799
		0.043	5.62904
		0.0432	5.60007
		0.0434	5.57111
		0.0436	5.54214
		0.0438	5.51317
		0.044	5.48421
		0.0442	5.45524
		0.0444	5.42629
		0.0446	5.39734
		0.0448	5.36839
		0.045	5.33946
		0.0452	5.31054
		0.0454	5.28163
		0.0456	5.25274
		0.0458	5.22386
		0.046	5.195
		0.0462	5.16616
		0.0464	5.13734
		0.0466	5.10854
		0.0468	5.07977
		0.047	5.05102
		0.0472	5.0223
		0.0474	4.9936
		0.0476	4.96494
		0.0478	4.93631
		0.048	4.90771
		0.0482	4.87914
		0.0484	4.85061
		0.0486	4.82212
		0.0488	4.79366
		0.049	4.76525
		0.0492	4.73687
		0.0494	4.70854
		0.0496	4.68025
		0.0498	4.65201
		0.05	4.62382
		0.0502	4.59567
		0.0504	4.56758
		0.0506	4.53953
		0.0508	4.51154
		0.051	4.4836
		0.0512	4.45572
		0.0514	4.42789
		0.0516	4.40012
		0.0518	4.37242
		0.052	4.34477
		0.0522	4.31718
		0.0524	4.28965
		0.0526	4.26219
		0.0528	4.2348
		0.053	4.20747
		0.0532	4.18021
		0.0534	4.15302
		0.0536	4.1259
		0.0538	4.09885
		0.054	4.07188
		0.0542	4.04497
		0.0544	4.01815
		0.0546	3.9914
		0.0548	3.96472
		0.055	3.93813
		0.0552	3.91161
		0.0554	3.88518
		0.0556	3.85882
		0.0558	3.83255
		0.056	3.80637
		0.0562	3.78026
		0.0564	3.75425
		0.0566	3.72832
		0.0568	3.70247
		0.057	3.67672
		0.0572	3.65106
		0.0574	3.62548
		0.0576	3.6
		0.0578	3.57461
		0.058	3.54932
		0.0582	3.52411
		0.0584	3.49901
		0.0586	3.474
		0.0588	3.44908
		0.059	3.42427
		0.0592	3.39955
		0.0594	3.37493
		0.0596	3.35041
		0.0598	3.32599
		0.06	3.30167
		0.0602	3.27746
		0.0604	3.25335
		0.0606	3.22934
		0.0608	3.20543
		0.061	3.18163
		0.0612	3.15794
		0.0614	3.13435
		0.0616	3.11087
		0.0618	3.08749
		0.062	3.06423
		0.0622	3.04107
		0.0624	3.01802
		0.0626	2.99508
		0.0628	2.97225
		0.063	2.94953
		0.0632	2.92693
		0.0634	2.90443
		0.0636	2.88204
		0.0638	2.85977
		0.064	2.83761
		0.0642	2.81557
		0.0644	2.79364
		0.0646	2.77182
		0.0648	2.75011
		0.065	2.72852
		0.0652	2.70705
		0.0654	2.68569
		0.0656	2.66445
		0.0658	2.64332
		0.066	2.62231
		0.0662	2.60141
		0.0664	2.58063
		0.0666	2.55997
		0.0668	2.53943
		0.067	2.519
		0.0672	2.49869
		0.0674	2.4785
		0.0676	2.45843
		0.0678	2.43847
		0.068	2.41863
		0.0682	2.39891
		0.0684	2.37931
		0.0686	2.35982
		0.0688	2.34046
		0.069	2.32121
		0.0692	2.30208
		0.0694	2.28307
		0.0696	2.26418
		0.0698	2.24541
		0.07	2.22675
		0.0702	2.20821
		0.0704	2.1898
		0.0706	2.17149
		0.0708	2.15331
		0.071	2.13525
		0.0712	2.1173
		0.0714	2.09947
		0.0716	2.08176
		0.0718	2.06417
		0.072	2.0467
		0.0722	2.02934
		0.0724	2.0121
		0.0726	1.99497
		0.0728	1.97796
		0.073	1.96107
		0.0732	1.9443
		0.0734	1.92764
		0.0736	1.9111
		0.0738	1.89467
		0.074	1.87836
		0.0742	1.86216
		0.0744	1.84608
		0.0746	1.83012
		0.0748	1.81426
		0.075	1.79852
		0.0752	1.7829
		0.0754	1.76739
		0.0756	1.75199
		0.0758	1.7367
		0.076	1.72153
		0.0762	1.70646
		0.0764	1.69151
		0.0766	1.67667
		0.0768	1.66194
		0.077	1.64733
		0.0772	1.63282
		0.0774	1.61842
		0.0776	1.60413
		0.0778	1.58995
		0.078	1.57587
		0.0782	1.56191
		0.0784	1.54805
		0.0786	1.5343
		0.0788	1.52065
		0.079	1.50711
		0.0792	1.49368
		0.0794	1.48035
		0.0796	1.46713
		0.0798	1.45401
		0.08	1.44099
		0.0802	1.42808
		0.0804	1.41526
		0.0806	1.40255
		0.0808	1.38995
		0.081	1.37744
		0.0812	1.36503
		0.0814	1.35273
		0.0816	1.34052
		0.0818	1.32841
		0.082	1.3164
		0.0822	1.30449
		0.0824	1.29267
		0.0826	1.28096
		0.0828	1.26933
		0.083	1.25781
		0.0832	1.24637
		0.0834	1.23504
		0.0836	1.22379
		0.0838	1.21264
		0.084	1.20158
		0.0842	1.19062
		0.0844	1.17974
		0.0846	1.16896
		0.0848	1.15827
		0.085	1.14766
		0.0852	1.13715
		0.0854	1.12672
		0.0856	1.11639
		0.0858	1.10614
		0.086	1.09597
		0.0862	1.0859
		0.0864	1.0759
		0.0866	1.066
		0.0868	1.05617
		0.087	1.04644
		0.0872	1.03678
		0.0874	1.02721
		0.0876	1.01772
		0.0878	1.00831
		0.088	0.998981
		0.0882	0.989734
		0.0884	0.980566
		0.0886	0.971477
		0.0888	0.962466
		0.089	0.953534
		0.0892	0.944678
		0.0894	0.9359
		0.0896	0.927198
		0.0898	0.918571
		0.09	0.910019
		0.0902	0.901542
		0.0904	0.893138
		0.0906	0.884808
		0.0908	0.87655
		0.091	0.868364
		0.0912	0.86025
		0.0914	0.852207
		0.0916	0.844234
		0.0918	0.836331
		0.092	0.828498
		0.0922	0.820732
		0.0924	0.813035
		0.0926	0.805406
		0.0928	0.797843
		0.093	0.790347
		0.0932	0.782917
		0.0934	0.775552
		0.0936	0.768251
		0.0938	0.761015
		0.094	0.753843
		0.0942	0.746734
		0.0944	0.739687
		0.0946	0.732703
		0.0948	0.72578
		0.095	0.718918
		0.0952	0.712116
		0.0954	0.705375
		0.0956	0.698692
		0.0958	0.692069
		0.096	0.685504
		0.0962	0.678997
		0.0964	0.672548
		0.0966	0.666155
		0.0968	0.659819
		0.097	0.653539
		0.0972	0.647314
		0.0974	0.641144
		0.0976	0.635028
		0.0978	0.628966
		0.098	0.622958
		0.0982	0.617003
		0.0984	0.6111
		0.0986	0.60525
		0.0988	0.599451
		0.099	0.593703
		0.0992	0.588006
		0.0994	0.582359
		0.0996	0.576762
		0.0998	0.571214
		0.1	0.565715
		0.1002	0.560264
		0.1004	0.554862
		0.1006	0.549507
		0.1008	0.544199
		0.101	0.538938
		0.1012	0.533724
		0.1014	0.528555
		0.1016	0.523432
		0.1018	0.518354
		0.102	0.51332
		0.1022	0.508331
		0.1024	0.503386
		0.1026	0.498484
		0.1028	0.493625
		0.103	0.488809
		0.1032	0.484035
		0.1034	0.479303
		0.1036	0.474613
		0.1038	0.469964
		0.104	0.465356
		0.1042	0.460789
		0.1044	0.456261
		0.1046	0.451773
		0.1048	0.447325
		0.105	0.442916
		0.1052	0.438545
		0.1054	0.434213
		0.1056	0.429919
		0.1058	0.425662
		0.106	0.421443
		0.1062	0.417261
		0.1064	0.413115
		0.1066	0.409006
		0.1068	0.404933
		0.107	0.400896
		0.1072	0.396894
		0.1074	0.392927
		0.1076	0.388996
		0.1078	0.385098
		0.108	0.381235
		0.1082	0.377406
		0.1084	0.37361
		0.1086	0.369848
		0.1088	0.366119
		0.109	0.362422
		0.1092	0.358758
		0.1094	0.355127
		0.1096	0.351527
		0.1098	0.347959
		0.11	0.344422
		0.1102	0.340916
		0.1104	0.337441
		0.1106	0.333997
		0.1108	0.330583
		0.111	0.3272
		0.1112	0.323846
		0.1114	0.320521
		0.1116	0.317226
		0.1118	0.31396
		0.112	0.310723
		0.1122	0.307515
		0.1124	0.304335
		0.1126	0.301183
		0.1128	0.298059
		0.113	0.294962
		0.1132	0.291893
		0.1134	0.288852
		0.1136	0.285837
		0.1138	0.282849
		0.114	0.279888
		0.1142	0.276953
		0.1144	0.274044
		0.1146	0.271161
		0.1148	0.268304
		0.115	0.265472
		0.1152	0.262666
		0.1154	0.259885
		0.1156	0.257128
		0.1158	0.254397
		0.116	0.25169
		0.1162	0.249007
		0.1164	0.246348
		0.1166	0.243714
		0.1168	0.241103
		0.117	0.238515
		0.1172	0.235951
		0.1174	0.23341
		0.1176	0.230892
		0.1178	0.228397
		0.118	0.225925
		0.1182	0.223475
		0.1184	0.221047
		0.1186	0.218642
		0.1188	0.216258
		0.119	0.213897
		0.1192	0.211557
		0.1194	0.209238
		0.1196	0.206941
		0.1198	0.204664
		0.12	0.202409
		0.1202	0.200175
		0.1204	0.197961
		0.1206	0.195767
		0.1208	0.193594
		0.121	0.191441
		0.1212	0.189308
		0.1214	0.187195
		0.1216	0.185102
		0.1218	0.183028
		0.122	0.180974
		0.1222	0.178939
		0.1224	0.176923
		0.1226	0.174926
		0.1228	0.172948
		0.123	0.170988
		0.1232	0.169047
		0.1234	0.167125
		0.1236	0.16522
		0.1238	0.163334
		0.124	0.161466
		0.1242	0.159616
		0.1244	0.157783
		0.1246	0.155968
		0.1248	0.15417
		0.125	0.15239
		0.1252	0.150627
		0.1254	0.148881
		0.1256	0.147152
		0.1258	0.145439
		0.126	0.143743
		0.1262	0.142064
		0.1264	0.140401
		0.1266	0.138755
		0.1268	0.137124
		0.127	0.13551
		0.1272	0.133912
		0.1274	0.132329
		0.1276	0.130762
		0.1278	0.12921
		0.128	0.127674
		0.1282	0.126154
		0.1284	0.124648
		0.1286	0.123157
		0.1288	0.121682
		0.129	0.120221
		0.1292	0.118775
		0.1294	0.117344
		0.1296	0.115927
		0.1298	0.114524
		0.13	0.113136
		0.1302	0.111762
		0.1304	0.110402
		0.1306	0.109055
		0.1308	0.107723
		0.131	0.106404
		0.1312	0.105099
		0.1314	0.103808
		0.1316	0.102529
		0.1318	0.101264
		0.132	0.100013
		0.1322	0.0987738
		0.1324	0.097548
		0.1326	0.0963351
		0.1328	0.0951349
		0.133	0.0939474
		0.1332	0.0927723
		0.1334	0.0916098
		0.1336	0.0904595
		0.1338	0.0893215
		0.134	0.0881956
		0.1342	0.0870818
		0.1344	0.0859799
		0.1346	0.0848898
		0.1348	0.0838114
		0.135	0.0827447
		0.1352	0.0816896
		0.1354	0.0806458
		0.1356	0.0796134
		0.1358	0.0785923
		0.136	0.0775823
		0.1362	0.0765834
		0.1364	0.0755954
		0.1366	0.0746183
		0.1368	0.073652
		0.137	0.0726964
		0.1372	0.0717513
		0.1374	0.0708168
		0.1376	0.0698927
		0.1378	0.0689788
		0.138	0.0680753
		0.1382	0.0671818
		0.1384	0.0662984
		0.1386	0.065425
		0.1388	0.0645614
		0.139	0.0637076
		0.1392	0.0628635
		0.1394	0.0620291
		0.1396	0.0612041
		0.1398	0.0603886
		0.14	0.0595824
		0.1402	0.0587855
		0.1404	0.0579978
		0.1406	0.0572192
		0.1408	0.0564496
		0.141	0.055689
		0.1412	0.0549372
		0.1414	0.0541941
		0.1416	0.0534597
		0.1418	0.052734
		0.142	0.0520168
		0.1422	0.051308
		0.1424	0.0506076
		0.1426	0.0499155
		0.1428	0.0492315
		0.143	0.0485557
		0.1432	0.047888
		0.1434	0.0472283
		0.1436	0.0465764
		0.1438	0.0459324
		0.144	0.0452961
		0.1442	0.0446675
		0.1444	0.0440465
		0.1446	0.043433
		0.1448	0.0428269
		0.145	0.0422283
		0.1452	0.0416369
		0.1454	0.0410528
		0.1456	0.0404758
		0.1458	0.0399059
		0.146	0.0393431
		0.1462	0.0387872
		0.1464	0.0382381
		0.1466	0.0376959
		0.1468	0.0371604
		0.147	0.0366316
		0.1472	0.0361094
		0.1474	0.0355937
		0.1476	0.0350845
		0.1478	0.0345816
		0.148	0.0340852
		0.1482	0.0335949
		0.1484	0.0331109
		0.1486	0.0326331
		0.1488	0.0321613
		0.149	0.0316955
		0.1492	0.0312357
		0.1494	0.0307817
		0.1496	0.0303336
		0.1498	0.0298912
		0.15	0.0294545
		0.1502	0.0290235
		0.1504	0.0285981
		0.1506	0.0281781
		0.1508	0.0277637
		0.151	0.0273546
		0.1512	0.0269508
		0.1514	0.0265524
		0.1516	0.0261591
		0.1518	0.0257711
		0.152	0.0253881
		0.1522	0.0250102
		0.1524	0.0246373
		0.1526	0.0242693
		0.1528	0.0239062
		0.153	0.023548
		0.1532	0.0231945
		0.1534	0.0228458
		0.1536	0.0225017
		0.1538	0.0221622
		0.154	0.0218273
		0.1542	0.0214969
		0.1544	0.021171
		0.1546	0.0208495
		0.1548	0.0205324
		0.155	0.0202195
		0.1552	0.0199109
		0.1554	0.0196066
		0.1556	0.0193064
		0.1558	0.0190103
		0.156	0.0187182
		0.1562	0.0184302
		0.1564	0.0181462
		0.1566	0.0178661
		0.1568	0.0175898
		0.157	0.0173174
		0.1572	0.0170488
		0.1574	0.0167839
		0.1576	0.0165227
		0.1578	0.0162651
		0.158	0.0160112
		0.1582	0.0157608
		0.1584	0.015514
		0.1586	0.0152706
		0.1588	0.0150307
		0.159	0.0147941
		0.1592	0.0145609
		0.1594	0.0143311
		0.1596	0.0141045
		0.1598	0.0138811
		0.16	0.0136609
		0.1602	0.0134439
		0.1604	0.0132299
		0.1606	0.0130191
		0.1608	0.0128113
		0.161	0.0126065
		0.1612	0.0124046
		0.1614	0.0122057
		0.1616	0.0120096
		0.1618	0.0118164
		0.162	0.011626
		0.1622	0.0114384
		0.1624	0.0112535
		0.1626	0.0110713
		0.1628	0.0108919
		0.163	0.010715
		0.1632	0.0105407
		0.1634	0.0103691
		0.1636	0.0101999
		0.1638	0.0100333
		0.164	0.0098691
		0.1642	0.00970737
		0.1644	0.00954805
		0.1646	0.0093911
		0.1648	0.00923649
		0.165	0.0090842
		0.1652	0.0089342
		0.1654	0.00878644
		0.1656	0.00864091
		0.1658	0.00849757
		0.166	0.00835639
		0.1662	0.00821736
		0.1664	0.00808043
		0.1666	0.00794558
		0.1668	0.00781277
		0.167	0.007682
		0.1672	0.00755321
		0.1674	0.0074264
		0.1676	0.00730153
		0.1678	0.00717858
		0.168	0.00705751
		0.1682	0.00693832
		0.1684	0.00682096
		0.1686	0.00670541
		0.1688	0.00659165
		0.169	0.00647965
		0.1692	0.0063694
		0.1694	0.00626086
		0.1696	0.00615401
		0.1698	0.00604883
		0.17	0.0059453
		0.1702	0.00584338
		0.1704	0.00574307
		0.1706	0.00564433
		0.1708	0.00554715
		0.171	0.0054515
		0.1712	0.00535737
		0.1714	0.00526472
		0.1716	0.00517354
		0.1718	0.00508381
		0.172	0.0049955
		0.1722	0.0049086
		0.1724	0.00482309
		0.1726	0.00473895
		0.1728	0.00465616
		0.173	0.00457469
		0.1732	0.00449453
		0.1734	0.00441566
		0.1736	0.00433806
		0.1738	0.00426172
		0.174	0.00418661
		0.1742	0.00411272
		0.1744	0.00404003
		0.1746	0.00396852
		0.1748	0.00389817
		0.175	0.00382897
		0.1752	0.00376091
		0.1754	0.00369395
		0.1756	0.0036281
		0.1758	0.00356332
		0.176	0.00349961
		0.1762	0.00343694
		0.1764	0.00337532
		0.1766	0.00331471
		0.1768	0.0032551
		0.177	0.00319648
		0.1772	0.00313883
		0.1774	0.00308215
		0.1776	0.00302641
		0.1778	0.0029716
		0.178	0.0029177
		0.1782	0.00286471
		0.1784	0.0028126
		0.1786	0.00276137
		0.1788	0.002711
		0.179	0.00266148
		0.1792	0.00261279
		0.1794	0.00256493
		0.1796	0.00251787
		0.1798	0.00247161
		0.18	0.00242615
		0.1802	0.00238145
		0.1804	0.00233751
		0.1806	0.00229433
		0.1808	0.00225188
		0.181	0.00221016
		0.1812	0.00216915
		0.1814	0.00212885
		0.1816	0.00208924
		0.1818	0.00205032
		0.182	0.00201206
		0.1822	0.00197446
		0.1824	0.00193751
		0.1826	0.00190121
		0.1828	0.00186554
		0.183	0.00183049
		0.1832	0.00179605
		0.1834	0.0017622
		0.1836	0.00172895
		0.1838	0.00169628
		0.184	0.00166419
		0.1842	0.00163265
		0.1844	0.00160168
		0.1846	0.00157124
		0.1848	0.00154134
		0.185	0.00151197
		0.1852	0.00148312
		0.1854	0.00145479
		0.1856	0.00142695
		0.1858	0.00139961
		0.186	0.00137275
		0.1862	0.00134638
		0.1864	0.00132047
		0.1866	0.00129503
		0.1868	0.00127004
		0.187	0.00124551
		0.1872	0.0012214
		0.1874	0.00119774
		0.1876	0.0011745
		0.1878	0.00115168
		0.188	0.00112927
		0.1882	0.00110726
		0.1884	0.00108566
		0.1886	0.00106445
		0.1888	0.00104363
		0.189	0.00102318
		0.1892	0.0010031
		0.1894	0.000983399
		0.1896	0.000964049
		0.1898	0.000945054
		0.19	0.000926412
		0.1902	0.000908112
		0.1904	0.000890149
		0.1906	0.000872517
		0.1908	0.000855211
		0.191	0.000838224
		0.1912	0.000821552
		0.1914	0.000805189
		0.1916	0.00078913
		0.1918	0.000773365
		0.192	0.000757898
		0.1922	0.00074272
		0.1924	0.000727825
		0.1926	0.000713208
		0.1928	0.000698862
		0.193	0.000684789
		0.1932	0.00067098
		0.1934	0.000657432
		0.1936	0.000644134
		0.1938	0.000631092
		0.194	0.000618296
		0.1942	0.000605739
		0.1944	0.000593424
		0.1946	0.000581338
		0.1948	0.000569487
		0.195	0.000557861
		0.1952	0.000546457
		0.1954	0.000535271
		0.1956	0.0005243
		0.1958	0.000513538
		0.196	0.000502983
		0.1962	0.000492631
		0.1964	0.000482477
		0.1966	0.00047252
		0.1968	0.000462755
		0.197	0.000453179
		0.1972	0.000443788
		0.1974	0.000434579
		0.1976	0.000425549
		0.1978	0.000416695
		0.198	0.000408009
		0.1982	0.000399497
		0.1984	0.000391151
		0.1986	0.000382968
		0.1988	0.000374945
		0.199	0.000367081
		0.1992	0.00035937
		0.1994	0.000351811
		0.1996	0.000344402
		0.1998	0.000337138
[truncated: 1 more rows]

## Sheet: Alfa-Ti
Time	Grain	Sample	44Ca	46Ti	47Ti	48Ti	49Ti	50Ti	49Ti/47Ti	se	46Ti/47Ti	se	48Ti/47Ti	se	δ49/47Ti	2se	δ46/47Ti	δ48/47Ti
2022-02-11	One Grain (Grain one) Profile	Alfa-Ti_001	-5.50259e-06	3.15045	2.95792	30.4971	2.32838	2.35103	0.787164	1.86783e-05	1.06509	2.54358e-05	10.3109	0.00355836
		Alfa-Ti_002	-6.59537e-06	3.1658	2.9725	30.6597	2.33997	2.36222	0.787205	2.08405e-05	1.06503	2.55498e-05	10.3146	0.000891314	0.0199475	0.0529491	-0.0370835	0.25914
		Alfa-Ti_003	-6.64744e-07	3.23138	3.03401	31.2884	2.38842	2.41046	0.787214	1.80726e-05	1.06505	2.22389e-05	10.3129	0.00177554	0.0334136	0.0459169	-0.00370183	-0.219213
		Alfa-Ti_004	7.18349e-06	3.24604	3.04769	31.4394	2.39907	2.42102	0.78717	1.99672e-05	1.06508	2.56601e-05	10.3157	0.000221817	-0.0232443	0.0507305	0.0481471	0.150351
		Alfa-Ti_005	8.69428e-06	3.26957	3.07	31.6687	2.4166	2.43829	0.787163	1.85638e-05	1.06501	2.17903e-05	10.3155	0.000186442	-0.0277473	0.0471651	-0.0222567	-0.0253786
		Alfa-Ti_006	1.80299e-05	3.29106	3.09024	31.8784	2.43266	2.45399	0.7872	1.90056e-05	1.06498	2.3585e-05	10.3157	0.000202035	0.0226973	0.0482877	-0.0362299	0.0245088
		Alfa-Ti_007	-7.52397e-06	3.26004	3.06097	31.5757	2.40963	2.43085	0.7872	1.96545e-05	1.06503	2.48537e-05	10.3155	0.000476023	-0.0330098	0.0499337	0.0231387	-0.054445
		Alfa-Ti_008	-5.1387e-06	3.28262	3.08217	31.7971	2.42647	2.44727	0.787253	2.09198e-05	1.06503	2.49272e-05	10.3164	0.000222127	0.0715381	0.0531502	0.00611931	0.0631843
		Alfa-Ti_009	6.52247e-06	3.22664	3.02965	31.2539	2.38494	2.40568	0.787194	1.78717e-05	1.06502	2.48931e-05	10.316	0.000207618	-0.0760433	0.0454027	-0.0166232	-0.0421545
		Alfa-Ti_010	-5.59364e-06	3.23681	3.03913	31.3531	2.39258	2.41299	0.787254	1.82546e-05	1.06505	2.25644e-05	10.3164	0.00019557	0.0126612	0.0463759	-0.00153539	0.0744026
		Alfa-Ti_011	-2.07166e-05	3.20643	3.01052	31.0542	2.37017	2.39039	0.787294	1.89871e-05	1.06507	2.4244e-05	10.3153	0.000774929	0.0267284	0.0482352	0.0473836	-0.0238506
		Alfa-Ti_012	-4.01846e-06	3.15646	2.96382	30.5707	2.33339	2.35336	0.787292	1.7298e-05	1.065	2.38985e-05	10.3147	0.0012879	-0.0100086	0.0439425	-0.0485222	-0.123818
		Alfa-Ti_013	-1.69305e-05	3.1269	2.93597	30.2896	2.31151	2.33137	0.787305	1.92341e-05	1.06503	2.32339e-05	10.3167	0.000177794	0.00370282	0.0488609	-0.0105264	0.0961799
		Alfa-Ti_014	1.14497e-05	3.24296	3.0448	31.4122	2.39723	2.41662	0.787313	1.95531e-05	1.06508	2.418e-05	10.3167	0.000413888	0.0167051	0.0496713	0.0748618	-0.010899
		Alfa-Ti_015	-8.92395e-07	3.17935	2.98537	30.8	2.35039	2.36969	0.787295	1.74207e-05	1.06497	2.46735e-05	10.3169	0.000209178	-0.0711076	0.0442514	-0.0762159	-0.0321711
		Alfa-Ti_016	1.47583e-05	3.24899	3.0506	31.4756	2.40203	2.42097	0.787388	1.9222e-05	1.06503	2.51618e-05	10.3177	0.000204991	0.0791866	0.0488286	0.0234381	0.0561223
		Alfa-Ti_017	1.32265e-05	3.27648	3.07639	31.7408	2.42225	2.44087	0.787357	2.16844e-05	1.06503	2.42669e-05	10.3175	0.000206759	-0.0361732	0.0550794	-0.00104471	-0.0214026
		Alfa-Ti_018	-7.77642e-06	3.21537	3.01901	31.1492	2.37714	2.3956	0.787383	1.79218e-05	1.06504	2.53679e-05	10.3176	0.000215755	-0.00434623	0.0455224	-0.00419599	0.0672776
		Alfa-Ti_019	-7.79206e-06	3.20283	3.00719	31.0229	2.36792	2.38615	0.787416	1.94437e-05	1.06506	2.56492e-05	10.3164	0.000945931	0.0395767	0.0493882	8.86821e-06	0.00134512
		Alfa-Ti_020	-5.43446e-07	3.17301	2.97915	30.7295	2.34576	2.36387	0.787386	2.06134e-05	1.06507	2.42181e-05	10.3151	0.00150364	-0.0278204	0.0523576	0.00512071	-0.199749
		Alfa-Ti_021	1.34398e-05	3.25688	3.05787	31.5511	2.40778	2.42561	0.7874	1.80804e-05	1.06508	2.35806e-05	10.3179	0.000205505	0.00926772	0.0459247	0.0161204	0.239302
		Alfa-Ti_022	-5.32128e-06	3.1188	2.9283	30.2071	2.30575	2.32364	0.7874	1.88195e-05	1.06505	2.48813e-05	10.3159	0.00131979	-0.000511909	0.0478015	-0.0234642	-0.197936
		Alfa-Ti_023	1.16153e-05	3.13992	2.94808	30.418	2.32132	2.339	0.7874	1.8536e-05	1.06507	2.45576e-05	10.3179	0.000201866	0.00139997	0.0470816	0.0259615	0.0857877
		Alfa-Ti_024	9.26541e-06	3.15897	2.96606	30.6042	2.33549	2.35307	0.787398	1.85725e-05	1.06504	2.45853e-05	10.3181	0.000200117	-0.0380995	0.0471724	-0.0451823	-0.0185359
		Alfa-Ti_025	-3.0239e-05	3.17195	2.97808	30.73	2.34512	2.36241	0.787457	1.87838e-05	1.0651	2.34645e-05	10.3187	0.000199284	0.0430826	0.0477096	0.0569027	0.0907326
		Alfa-Ti_026	-1.38864e-05	3.20642	3.01059	31.0616	2.37069	2.38778	0.787447	2.02029e-05	1.06504	2.34111e-05	10.3175	0.0005595	-0.0106021	0.0513118	-0.0267165	-0.115821
		Alfa-Ti_027	9.82115e-06	3.20706	3.0112	31.0716	2.3712	2.38801	0.787454	2.22296e-05	1.06504	2.55188e-05	10.3186	0.000231545	-0.0066448	0.056459	0.0143074	0.056221
		Alfa-Ti_028	-2.93671e-06	3.20674	3.01099	31.0694	2.3711	2.38783	0.787472	1.89106e-05	1.06501	2.04791e-05	10.3186	0.000203757	0.0143299	0.0480294	-0.0437737	0.151053
		Alfa-Ti_028	2.07834e-06	3.10164	2.91215	30.0392	2.29324	2.31	0.787466	2.02774e-05	1.06507	2.41733e-05	10.3154	0.00176376
2022-02-11	One Grain (Grain one) Profile	Alfa-Ti_001	9.74972e-06	3.09963	2.91066	30.0444	2.2933	2.30686	0.78789	1.96191e-05	1.06493	2.54526e-05	10.3221	0.000183692
		Alfa-Ti_002	2.0098e-05	3.11452	2.92456	30.1826	2.30416	2.31771	0.787864	1.61825e-05	1.06495	2.29782e-05	10.3205	0.000836835	-0.030911	0.0410783	0.0200059	-0.163159
		Alfa-Ti_003	-5.1137e-06	3.14592	2.95409	30.4929	2.32749	2.341	0.787886	1.95224e-05	1.06493	2.57287e-05	10.3223	0.000195393	0.0046708	0.0495567	-0.0138128	0.07807
		Alfa-Ti_004	-1.05406e-05	3.22595	3.02921	31.2687	2.38672	2.4	0.787901	1.65766e-05	1.06494	2.25434e-05	10.3224	0.000181964	0.0354813	0.0420792	0.0136616	0.149806
		Alfa-Ti_005	-8.94236e-06	3.29309	3.09231	31.9104	2.43631	2.4494	0.78786	1.80828e-05	1.06493	2.16394e-05	10.3194	0.00140493	-0.0477095	0.0459014	-0.0401075	-0.282589
		Alfa-Ti_006	9.14688e-06	3.31377	3.11153	32.1182	2.45156	2.4646	0.787895	1.94302e-05	1.06499	2.40133e-05	10.3223	0.000205778	0.0400931	0.0493238	0.054499	0.221311
		Alfa-Ti_007	3.54197e-06	3.2936	3.09272	31.9185	2.43665	2.44962	0.787866	1.60255e-05	1.06495	2.35885e-05	10.3206	0.00116652	-0.0478657	0.0406788	-0.0614722	-0.188902
		Alfa-Ti_008	-5.40815e-07	3.27242	3.07261	31.718	2.42095	2.43394	0.787912	1.75335e-05	1.06503	2.07035e-05	10.3228	0.000169279	0.0384924	0.044508	0.0657645	0.132365
		Alfa-Ti_009	-5.92541e-06	3.28389	3.08355	31.8293	2.42952	2.44249	0.787898	1.68665e-05	1.06497	2.30933e-05	10.3223	0.000180026	-0.0529122	0.0428118	-0.0305716	-0.0526242
		Alfa-Ti_010	-1.00172e-07	3.2088	3.01301	31.1028	2.37415	2.38701	0.787968	1.65511e-05	1.06498	2.23134e-05	10.3228	0.00017173	0.0320725	0.042011	0.0283535	0.0308267
		Alfa-Ti_011	1.1375e-05	3.15842	2.96585	30.6158	2.33705	2.34997	0.787986	2.1474e-05	1.06493	2.5906e-05	10.3228	0.000223975	0.0313505	0.0545053	-0.0568431	0.0695892
		Alfa-Ti_012	4.92223e-06	3.10797	2.91828	30.1205	2.29946	2.31251	0.787956	1.81171e-05	1.065	2.44247e-05	10.3212	0.00132544	0.000484289	0.0459851	0.0392791	-0.129323
		Alfa-Ti_013	1.27808e-05	3.09367	2.9049	29.9855	2.28883	2.30184	0.787924	1.73782e-05	1.06498	2.43009e-05	10.3224	0.000196008	-0.051992	0.044109	0.00216033	0.0312318
		Alfa-Ti_014	3.59894e-06	3.07101	2.88367	29.7679	2.27225	2.28516	0.787975	1.84864e-05	1.06496	2.64153e-05	10.3229	0.000191106	0.0160551	0.046922	-0.00873018	0.0496016
		Alfa-Ti_015	-1.87394e-06	3.06591	2.87889	29.7171	2.26855	2.28147	0.788	1.88777e-05	1.06496	2.56986e-05	10.3224	0.000594087	0.00456563	0.0479132	-0.0125585	0.0325619
		Alfa-Ti_016	6.91733e-06	3.0622	2.87533	29.6771	2.2658	2.27858	0.788018	1.93236e-05	1.06499	2.68006e-05	10.3212	0.00101232	0.0532669	0.0490462	0.0214256	-0.124472
		Alfa-Ti_017	-1.75937e-05	3.11093	2.92114	30.1538	2.30172	2.31444	0.787952	2.04364e-05	1.06497	2.66309e-05	10.3226	0.000223929	-0.0733799	0.0518683	-0.0197042	0.0373875
		Alfa-Ti_018	-1.0264e-06	3.12047	2.93004	30.2474	2.30886	2.32156	0.788002	1.8925e-05	1.06499	2.74208e-05	10.3232	0.000191584	0.0511294	0.0480353	0.0331081	0.0409809
		Alfa-Ti_019	-1.2463e-05	3.15557	2.96314	30.5884	2.33487	2.34729	0.787971	1.67861e-05	1.06494	2.31405e-05	10.323	0.0001729	0.000764327	0.042606	-0.0583936	-0.00710609
		Alfa-Ti_020	-7.41111e-06	3.15841	2.9656	30.6136	2.33671	2.34908	0.787939	1.79434e-05	1.06502	2.12446e-05	10.3229	0.000181842	-0.0157658	0.0455445	0.0430694	0.0854675
		Alfa-Ti_021	-1.08912e-05	3.19815	3.00295	30.9935	2.36613	2.37842	0.787931	1.97025e-05	1.065	2.51069e-05	10.321	0.000946905	-0.0276192	0.0500093	-0.0139619	-0.188498
		Alfa-Ti_022	-1.11258e-05	3.21897	3.02247	31.2012	2.38161	2.39376	0.787968	1.76436e-05	1.06501	2.16842e-05	10.3231	0.000183245	0.0407971	0.0447843	0.0325773	0.167059
		Alfa-Ti_023	4.34619e-06	3.13434	2.94316	30.3782	2.31904	2.33124	0.78794	1.83766e-05	1.06496	2.30456e-05	10.3217	0.000607806	-0.0381158	0.046643	-0.00830274	-0.127435
		Alfa-Ti_024	4.21726e-06	3.22974	3.03284	31.3077	2.38979	2.40174	0.787972	1.88089e-05	1.06492	2.43634e-05	10.3229	0.000177321	0.0108005	0.0477407	-0.00976457	0.0566843
		Alfa-Ti_025	6.76449e-06	3.16665	2.97364	30.6968	2.3432	2.3552	0.787987	1.80239e-05	1.0649	2.28351e-05	10.3229	0.000182915	-0.000220306	0.0457468	-0.0172542	-0.00675931
		Alfa-Ti_026	1.02358e-05	3.16228	2.96949	30.6545	2.33997	2.35185	0.788002	1.52435e-05	1.06492	2.13811e-05	10.3231	0.000171727	0.0296824	0.0386901	0.00498305	0.0133846
		Alfa-Ti_027	-1.14541e-05	3.14065	2.94914	30.4442	2.32384	2.33573	0.787971	1.78692e-05	1.06493	2.34529e-05	10.3231	0.000186004	-0.0486037	0.0453529	-0.0128063	0.0140947
		Alfa-Ti_028	9.98139e-06	3.15006	2.95788	30.5332	2.33086	2.34269	0.788016	1.89993e-05	1.06497	2.51041e-05	10.3227	0.000381069	0.0490248	0.0482229	0.0239829	-0.0481498
		Alfa-Ti_029	1.87821e-05	3.15345	2.96111	30.5685	2.33331	2.34515	0.787984	1.90838e-05	1.06495	2.42627e-05	10.3233	0.000182445	-0.034696	0.0484354	-0.0259898	0.0293899
		Alfa-Ti_030	3.86297e-06	3.09555	2.90664	30.0061	2.29045	2.30229	0.788007	1.9861e-05	1.06499	2.5514e-05	10.3233	0.000190058	-0.0139983	0.0504075	0.0406825	-0.0176651
		Alfa-Ti_031	-2.14514e-06	3.0417	2.8562	29.4864	2.25082	2.26286	0.788051	1.80097e-05	1.06495	2.06767e-05	10.3237	0.000177234	0.0137126	0.0457075	-0.0156857	0.0464538
		Alfa-Ti_032	-3.8674e-06	2.98066	2.7989	28.8934	2.20574	2.21791	0.788074	1.87198e-05	1.06494	2.42099e-05	10.3231	0.00052005	0.0171699	0.0475086	-0.00785715	-0.0511555
		Alfa-Ti_033	-7.72976e-06	2.98728	2.80511	28.9587	2.21062	2.2226	0.78807	1.97031e-05	1.06494	2.72922e-05	10.3236	0.00018885	0.00381897	0.0500035	0.0321607	0.0591145
		Alfa-Ti_034	-5.94715e-06	2.89806	2.72149	28.0935	2.14468	2.15683	0.78806	1.86245e-05	1.06488	2.55858e-05	10.3228	0.000309745	-0.055533	0.0472642	-0.0312267	-0.0434417
		Alfa-Ti_035	-4.0842e-06	2.84443	2.67112	27.5739	2.1052	2.11755	0.788138	2.21783e-05	1.06488	2.81182e-05	10.323	0.000637299	0.0319158	0.056282	0.0145311	-0.0616304
		Alfa-Ti_036	-1.27305e-05	2.79195	2.62191	27.0696	2.06649	2.07894	0.788165	2.00459e-05	1.06485	2.99822e-05	10.3244	0.000203574	-0.0156215	0.0508664	0.010634	0.0684725
		Alfa-Ti_037	5.91676e-06	2.71959	2.55409	26.3693	2.01316	2.02574	0.788217	2.56885e-05	1.0648	2.51144e-05	10.3244	0.000237308	0.0481868	0.0651845	-0.0174662	0.10767
		Alfa-Ti_038	-8.46596e-06	2.73389	2.56754	26.5019	2.02372	2.03626	0.788193	2.06927e-05	1.06478	2.61974e-05	10.3222	0.00133397	-0.0344283	0.052505	0.034573	-0.0852473
		Alfa-Ti_039	1.53835e-05	2.69408	2.53036	26.1167	1.99447	2.00706	0.788223	2.2699e-05	1.06469	2.69408e-05	10.3217	0.00178428	-0.0116863	0.0575947	-0.0800403	-0.154133
		Alfa-Ti_040	-7.8203e-06	2.6623	2.5003	25.814	1.97088	1.98342	0.788272	2.54695e-05	1.06478	3.26051e-05	10.3245	0.000384201	0.0853806	0.0646267	0.0515087	0.196046
		Alfa-Ti_041	6.7289e-06	2.71141	2.54648	26.287	2.00706	2.01952	0.788186	2.13975e-05	1.06475	2.85091e-05	10.3232	0.000878126	-0.0915878	0.0542905	-0.0347757	-0.094788
		Alfa-Ti_042	-2.06005e-05	2.70915	2.54425	26.2658	2.00547	2.0179	0.788244	2.15929e-05	1.0648	3.09708e-05	10.3238	0.000690584	0.0263547	0.0547889	0.0312325	0.0198594
		Alfa-Ti_043	1.60507e-05	2.70004	2.53575	26.1789	1.99882	2.01125	0.788261	2.1122e-05	1.06478	2.65464e-05	10.324	0.00057329	0.0242568	0.0535926	0.0135527	-0.0185542
		Alfa-Ti_044	-3.79788e-06	2.7113	2.54643	26.2908	2.00716	2.01966	0.78824	2.19745e-05	1.06473	2.77435e-05	10.3246	0.000193392	-0.00076296	0.0557558	-0.0350274	0.0462606
		Alfa-Ti_045	-2.81407e-05	2.71515	2.54999	26.3266	2.00992	2.02236	0.788219	2.27506e-05	1.06476	2.80343e-05	10.3243	0.000388473	-0.0495445	0.0577237	-0.0091448	-0.0556056
		Alfa-Ti_046	-2.16665e-06	2.696	2.53191	26.1422	1.99583	2.00811	0.788277	2.44106e-05	1.0648	2.81341e-05	10.3251	0.000216723	0.0168857	0.0619352	0.0474848	0.0240462
		Alfa-Ti_047	1.57575e-05	2.66545	2.50335	25.848	1.97339	1.98575	0.788309	2.37681e-05	1.06475	2.98433e-05	10.3254	0.000208935	0.0190045	0.0603026	-0.0216674	0.0302602
		Alfa-Ti_048	7.19127e-06	2.70198	2.53768	26.2017	2.00047	2.01274	0.78831	2.14225e-05	1.06474	2.94386e-05	10.3251	0.000205792	-0.00553512	0.0543502	-0.0517259	-0.0283391
		Alfa-Ti_049	1.88892e-05	2.68705	2.52342	26.0551	1.98924	2.00159	0.78832	2.47595e-05	1.06484	3.04912e-05	10.3254	0.000214703	0.00953578	0.0628165	0.0993797	0.0243849
		Alfa-Ti_050	-2.3012e-05	2.69505	2.5312	26.1349	1.99537	2.0077	0.788315	2.20986e-05	1.06473	2.73178e-05	10.3251	0.00020299	-0.0275163	0.0560639	-0.0437581	-0.00328446
		Alfa-Ti_051	-2.24947e-05	2.68548	2.52225	26.0419	1.98841	2.00074	0.788353	2.22385e-05	1.06471	3.2979e-05	10.325	0.000397632	0.0390536	0.0564198	-0.0199004	-0.0327876
		Alfa-Ti_052	1.43133e-05	2.70458	2.54014	26.228	2.00245	2.0148	0.78833	2.34169e-05	1.06473	2.75631e-05	10.3255	0.000212958	-0.0411863	0.0594065	0.00755472	0.0252603
		Alfa-Ti_053	4.72157e-07	2.61515	2.45612	25.3605	1.93632	1.94873	0.788372	2.67805e-05	1.06474	2.8235e-05	10.3254	0.000225038	0.086116	0.0679447	0.00661766	0.0402019
		Alfa-Ti_054	7.01802e-06	2.69993	2.53575	26.1804	1.99886	2.01111	0.788278	2.05843e-05	1.06474	2.69909e-05	10.3246	0.000341429	-0.0577802	0.0522229	-0.00507622	-0.0513431
		Alfa-Ti_055	3.27964e-06	2.74723	2.58014	26.6391	2.03379	2.04587	0.788275	2.80341e-05	1.06474	2.82058e-05	10.3248	0.000235666	0.0580957	0.0711318	-0.00808181	0.0277176
		Alfa-Ti_056	-2.49259e-06	2.8841	2.70862	27.9647	2.13482	2.14653	0.788181	2.59434e-05	1.06476	3.11375e-05	10.3245	0.000223785	0.00144248	0.0658311	-0.0297542	0.0185909
		Alfa-Ti_057	1.82297e-05	3.00716	2.82399	29.154	2.22552	2.23679	0.788084	1.999e-05	1.06485	2.88638e-05	10.3237	0.000182665	-0.0321352	0.050729	-0.0205843	-0.0462218
		Alfa-Ti_058	1.3364e-05	3.12551	2.9348	30.2987	2.31273	2.32371	0.788038	1.70308e-05	1.06498	2.57159e-05	10.3239	0.000193509	-0.0107089	0.043223	0.0631454	0.0361381
		Alfa-Ti_059	1.67319e-06	3.13125	2.9402	30.353	2.3169	2.32769	0.788009	2.00145e-05	1.06498	2.59346e-05	10.3234	0.000195291	-0.0453086	0.0507954	-0.00441585	-0.0555806
		Alfa-Ti_060	-1.08127e-05	3.14775	2.95569	30.5147	2.32923	2.34025	0.788051	1.72978e-05	1.06498	2.35859e-05	10.324	0.000181381	-0.0132023	0.0438996	0.0183897	0.0287758
		Alfa-Ti_061	9.82738e-06	3.12971	2.93884	30.3407	2.31614	2.32703	0.788114	1.76921e-05	1.06495	2.35712e-05	10.3241	0.000181588	0.0461835	0.0448993	-0.0116395	0.00462464
		Alfa-Ti_062	-9.42477e-06	3.12622	2.93559	30.307	2.31355	2.32446	0.788104	1.81015e-05	1.06494	2.05414e-05	10.324	0.000193551	-0.00420198	0.0459367	-0.012198	-0.0170949
		Alfa-Ti_063	8.71733e-06	3.21131	3.01544	31.1322	2.37647	2.38733	0.788101	1.45807e-05	1.06495	1.9345e-05	10.3243	0.000157196	-0.0114822	0.0370017	0.00565086	0.0139619
		Alfa-Ti_064	-2.24896e-05	3.20625	3.01069	31.0831	2.37277	2.38357	0.788116	1.45669e-05	1.06496	2.03394e-05	10.3243	0.000147863	0.0114088	0.0369669	0.0118317	-0.00876958
		Alfa-Ti_065	-2.26211e-06	3.24296	3.04521	31.4401	2.39997	2.41068	0.788113	1.59359e-05	1.06494	1.92537e-05	10.3244	0.000163944	-0.0186951	0.0404398	-0.0014073	0.0106524
		Alfa-Ti_066	-8.97236e-06	3.24441	3.04662	31.4545	2.40116	2.41176	0.788139	1.72836e-05	1.06492	2.03988e-05	10.3244	0.000178172	0.00108643	0.0438594	-0.0183553	-0.0330741
		Alfa-Ti_067	3.57911e-06	3.2764	3.07661	31.7661	2.42487	2.43552	0.788164	1.85167e-05	1.06494	2.15575e-05	10.325	0.000178323	0.0174069	0.0469877	0.0196359	0.0459812
		Alfa-Ti_068	2.04268e-05	3.2718	3.07235	31.7211	2.42151	2.43207	0.788161	1.62192e-05	1.06492	2.10042e-05	10.3247	0.000160257	-0.033688	0.0411557	-0.00889778	-0.0292094
		Alfa-Ti_069	-5.08743e-06	3.27314	3.07361	31.735	2.42265	2.43318	0.788211	1.47598e-05	1.06492	2.03488e-05	10.325	0.000163358	0.036394	0.0374528	0.0292954	0.0301948
		Alfa-Ti_070	-3.88468e-06	3.28967	3.08932	31.8962	2.43501	2.44554	0.788204	1.72168e-05	1.06485	2.23664e-05	10.3247	0.000177832	0.0131517	0.0436868	-0.0425659	-0.00888532
		Alfa-Ti_071	-2.24528e-06	3.27041	3.07115	31.7082	2.42061	2.4311	0.788177	1.73865e-05	1.06488	1.88768e-05	10.3245	0.00015589	-0.0106381	0.0441178	-0.0152889	-0.0104893
		Alfa-Ti_072	9.07941e-06	3.24928	3.05114	31.5017	2.4048	2.41538	0.788166	1.69686e-05	1.06494	2.37385e-05	10.3246	0.0001689	-0.0150109	0.0430577	0.0385309	0.00225706
		Alfa-Ti_073	1.06693e-05	3.25048	3.05233	31.5141	2.40578	2.41634	0.788178	1.67992e-05	1.06492	2.24486e-05	10.3246	0.000183347	0.00233036	0.042628	0.0162775	-0.00906437
		Alfa-Ti_074	1.16165e-05	3.22259	3.02631	31.2461	2.3853	2.39595	0.788187	1.52049e-05	1.06486	1.86914e-05	10.3248	0.000147081	-0.00696199	0.0385817	-0.0444504	0.00611421
		Alfa-Ti_075	3.24212e-06	3.2577	3.05917	31.5856	2.41126	2.42193	0.788207	1.61212e-05	1.0649	2.32562e-05	10.3249	0.000166182	0.0156798	0.0409067	0.0160132	0.00337081
		Alfa-Ti_076	1.63872e-05	3.24033	3.04285	31.4172	2.39838	2.40891	0.788203	1.66983e-05	1.0649	1.95693e-05	10.3249	0.00016242	-0.0252954	0.0423696	0.0236896	-0.00529499
		Alfa-Ti_077	1.05264e-05	3.24983	3.05191	31.5111	2.40563	2.41612	0.788238	1.42411e-05	1.06485	2.00453e-05	10.325	0.000152306
2022-02-11	One Grain (Grain one) Profile	Alfa-Ti_001	9.02848e-06	3.04141	2.85692	29.507	2.25321	2.26406	0.788687	1.87557e-05	1.06457	2.50265e-05	10.3283	0.000205123
		Alfa-Ti_002	3.46027e-06	3.06148	2.87568	29.6996	2.26789	2.27861	0.788644	1.6325e-05	1.06461	2.39166e-05	10.3278	0.000188413	-0.0229983	0.0413993	0.00114223	0.0411811
		Alfa-Ti_003	-5.05842e-06	3.10964	2.92083	30.1621	2.30347	2.31416	0.788637	1.82378e-05	1.06464	2.30675e-05	10.3266	0.000996056	0.0244974	0.0462527	0.0431844	-0.0195023
		Alfa-Ti_004	-1.51292e-05	3.14169	2.9511	30.4719	2.32722	2.33784	0.788591	1.78616e-05	1.06458	2.15213e-05	10.3257	0.00101708	-0.0583229	0.0452973	-0.00973387	-0.0396461
		Alfa-Ti_005	-1.1712e-05	3.11232	2.92361	30.1878	2.30568	2.3163	0.788637	1.65242e-05	1.06454	2.07593e-05	10.3256	0.00153546	0.0221773	0.0419067	-0.00428764	-0.101973
		Alfa-Ti_006	3.85195e-06	3.01656	2.83372	29.2659	2.23482	2.24555	0.788648	1.85067e-05	1.06452	2.59441e-05	10.3277	0.000200196	-0.0146	0.0469319	-0.0160454	0.0889244
		Alfa-Ti_007	-7.34503e-06	3.11406	2.92531	30.2124	2.30715	2.31774	0.788683	1.87674e-05	1.06452	2.48526e-05	10.3279	0.000194999	0.0253079	0.0475928	0.00982721	0.0200846
		Alfa-Ti_008	-9.40819e-07	3.0315	2.84779	29.4113	2.24599	2.25667	0.788677	1.873e-05	1.0645	2.41085e-05	10.3277	0.000193397	0.016114	0.047498	-0.021136	-0.0180009
		Alfa-Ti_009	3.46855e-06	3.05636	2.87106	29.6521	2.26427	2.27506	0.788646	2.10244e-05	1.06453	2.7885e-05	10.3279	0.00020635	-0.0201656	0.0533167	0.012798	0.015343
		Alfa-Ti_010	5.69194e-06	3.01572	2.83291	29.2576	2.23417	2.24498	0.788647	1.86101e-05	1.06454	2.51311e-05	10.3277	0.000196171	-0.0213189	0.047194	0.00223878	-0.0118431
		Alfa-Ti_011	4.14463e-06	3.06818	2.88218	29.7668	2.27313	2.28379	0.788681	1.63971e-05	1.06453	2.23377e-05	10.3278	0.000188408	0.0383019	0.0415828	-0.000614542	0.0118695
		Alfa-Ti_012	1.66687e-06	3.06342	2.87771	29.7202	2.26953	2.28023	0.788655	1.77042e-05	1.06453	2.46888e-05	10.3277	0.000195748	-0.00757688	0.0448969	-0.00642697	-0.00857272
		Alfa-Ti_013	-4.13415e-06	3.07558	2.8891	29.8379	2.27848	2.28912	0.788641	1.69345e-05	1.06454	2.13132e-05	10.3277	0.000180576	-0.0241644	0.042945	0.0104367	0.00348972
		Alfa-Ti_014	1.38087e-05	3.05392	2.86878	29.628	2.26251	2.27317	0.788665	1.99124e-05	1.06453	2.42447e-05	10.3277	0.000200851	-0.00191134	0.0504963	-0.0238149	-0.0251141
		Alfa-Ti_015	-4.81015e-06	3.05491	2.8696	29.6378	2.26324	2.27376	0.788692	1.59376e-05	1.06457	2.3146e-05	10.3282	0.000196151	0.020481	0.040416	0.0404207	0.034158
		Alfa-Ti_016	6.06552e-07	2.8847	2.70984	27.987	2.13721	2.14808	0.788687	1.86075e-05	1.06453	2.32612e-05	10.3279	0.000183403	-0.0183142	0.0471851	-0.0527656	-0.0258932
		Alfa-Ti_017	1.90108e-06	2.80459	2.63441	27.2089	2.07779	2.08897	0.788711	1.69784e-05	1.06459	2.60199e-05	10.3282	0.000190143	0.0189174	0.0430545	0.0511281	0.0245734
		Alfa-Ti_018	-5.95425e-06	2.77021	2.60223	26.8759	2.05238	2.06348	0.788705	1.98345e-05	1.06455	2.70225e-05	10.328	0.000201492	0.00967128	0.0502968	-0.0187666	-0.0108041
		Alfa-Ti_019	7.37613e-07	2.74355	2.57718	26.6173	2.03258	2.04382	0.788683	1.74857e-05	1.06455	2.78214e-05	10.3281	0.000201767	-0.0272299	0.0443403	0.00979394	-0.00011297
		Alfa-Ti_020	4.12757e-06	2.74491	2.57852	26.6312	2.03369	2.04491	0.788705	2.05224e-05	1.06453	2.38645e-05	10.3281	0.000182798	-0.0185865	0.0520398	-0.00825397	-0.0157436
		Alfa-Ti_021	-1.42881e-05	2.73177	2.56619	26.5048	2.0241	2.03539	0.788756	1.94696e-05	1.06452	2.30324e-05	10.3284	0.000189081	0.0703889	0.0493713	-0.0172789	0.0350543
		Alfa-Ti_022	-6.82399e-06	2.72964	2.56412	26.4825	2.02231	2.03356	0.788695	1.71611e-05	1.06455	2.54185e-05	10.3281	0.00019614	-0.0509946	0.0435154	0.0298026	-0.0175105
		Alfa-Ti_023	3.03212e-06	2.68676	2.52391	26.0671	1.99065	2.00201	0.788716	2.39256e-05	1.06452	3.07164e-05	10.3281	0.00022997	0.0189488	0.060671	-0.00864336	0.00244428
		Alfa-Ti_024	1.83488e-05	2.72336	2.55833	26.4224	2.01777	2.02898	0.788706	1.86469e-05	1.06451	2.57343e-05	10.328	0.000180745	-0.0129758	0.0472842	-0.0139047	-0.020074
		Alfa-Ti_025	4.24693e-06	2.71748	2.55276	26.3658	2.01341	2.02476	0.788717	1.95952e-05	1.06452	2.78557e-05	10.3284	0.00018608	0.0172264	0.0496896	-0.00348141	0.0286281
		Alfa-Ti_026	9.30176e-06	2.72981	2.56429	26.4842	2.02245	2.03379	0.788701	1.98458e-05	1.06455	2.27068e-05	10.3281	0.0001806	0.00761644	0.0503256	0.00531918	-0.0143053
		Alfa-Ti_027	-2.30937e-06	2.75611	2.58896	26.7392	2.04184	2.05311	0.788672	2.03468e-05	1.06456	2.77805e-05	10.3282	0.000178488	-0.00684294	0.0515973	-0.00305721	0.0103642
		Alfa-Ti_028	9.34457e-06	2.83439	2.66245	27.4978	2.09975	2.11084	0.788655	1.82025e-05	1.06458	2.23225e-05	10.328	0.000182428	-0.0198815	0.0461599	-0.00998183	-0.0151207
		Alfa-Ti_029	-9.67625e-06	2.86291	2.68915	27.7739	2.12084	2.13187	0.788668	1.97939e-05	1.06462	2.44765e-05	10.3282	0.000198501	0.0173057	0.0501965	0.00348224	0.015724
		Alfa-Ti_030	9.45747e-06	2.88419	2.70905	27.9791	2.1365	2.14744	0.788655	1.90908e-05	1.06465	2.45743e-05	10.328	0.000197592	-0.0239852	0.0484125	0.0204366	-0.0161706
		Alfa-Ti_031	2.02472e-05	2.89633	2.72048	28.0975	2.14558	2.15637	0.788679	1.90353e-05	1.06464	2.46616e-05	10.3282	0.000194907	0.0200257	0.0482724	0.00372918	0.00647669
		Alfa-Ti_032	-8.35148e-06	2.92333	2.74588	28.36	2.16559	2.17629	0.788672	1.96541e-05	1.06462	2.53991e-05	10.3282	0.000187719	0.00459209	0.0498412	-0.0413904	0.1006
		Alfa-Ti_033	5.73224e-06	2.93353	2.75529	28.4517	2.17297	2.18368	0.788658	2.20358e-05	1.06469	2.58552e-05	10.3262	0.00146113	-0.0086642	0.0558814	0.0417767	0.0157112
		Alfa-Ti_034	-2.41379e-05	2.89397	2.71818	28.0624	2.14371	2.15442	0.788657	2.14289e-05	1.06467	2.75308e-05	10.3238	0.00240255	0.0170345	0.0543438	-0.0102388	-0.321444
		Alfa-Ti_035	-8.04997e-06	2.85393	2.68057	27.685	2.11396	2.12481	0.788629	2.24304e-05	1.06467	2.56949e-05	10.328	0.000211537	-0.0575624	0.0568812	0.0320346	0.229326
		Alfa-Ti_036	-1.60319e-05	2.78224	2.6134	26.99	2.06115	2.07216	0.788692	2.15548e-05	1.0646	2.74424e-05	10.3276	0.000514318	-0.00171885	0.0546596	0.00653893	-0.0631432
		Alfa-Ti_037	8.25019e-06	2.65594	2.49494	25.7687	1.96789	1.9791	0.788758	2.07265e-05	1.06452	2.71744e-05	10.3284	0.000301922	0.0102019	0.0525553	-0.0378178	0.0723176
		Alfa-Ti_038	-1.51964e-05	2.58916	2.43222	25.1188	1.91853	1.92979	0.788808	2.48261e-05	1.06452	2.6395e-05	10.3278	0.000780026	0.00452383	0.0629461	-0.00738479	-0.0898055
		Alfa-Ti_039	1.46136e-05	2.59056	2.43348	25.1352	1.91962	1.93061	0.78885	2.29127e-05	1.06454	2.99262e-05	10.329	0.000219727	0.0838525	0.0580963	0.0127274	0.0749991
		Alfa-Ti_040	1.14296e-05	2.64918	2.48856	25.7029	1.9628	1.97375	0.78876	2.76349e-05	1.06453	3.12879e-05	10.3286	0.000226391	-0.0126882	0.0700708	-0.0313797	0.00112801
		Alfa-Ti_041	-6.13958e-06	2.8368	2.66466	27.5209	2.10155	2.11197	0.788691	2.14712e-05	1.06458	2.86497e-05	10.3282	0.000212192	0.000658923	0.0544476	-0.00310817	0.0407219
		Alfa-Ti_042	3.80451e-06	2.96752	2.7873	28.7844	2.19811	2.2082	0.78862	1.76844e-05	1.06465	2.5688e-05	10.327	0.000614088	-0.00135977	0.0448488	0.0119746	-0.0903687
		Alfa-Ti_043	-8.3306e-06	3.03333	2.84904	29.4239	2.24661	2.25669	0.788551	1.76336e-05	1.06468	2.21986e-05	10.3277	0.00019034	-0.0513232	0.0447218	0.00913587	0.0990675
		Alfa-Ti_044	-2.47026e-06	3.02849	2.84445	29.3723	2.24303	2.2531	0.788564	1.76016e-05	1.0647	2.09091e-05	10.3263	0.000960031	-0.0287698	0.0446409	0.0370144	-0.139001
		Alfa-Ti_045	-1.02364e-06	2.94328	2.76458	28.5519	2.18021	2.19041	0.788622	1.72908e-05	1.06464	2.43459e-05	10.3277	0.000196488	0.0262886	0.0438518	-0.031218	0.0580436
		Alfa-Ti_046	-9.96991e-06	2.9528	2.77351	28.645	2.18731	2.19739	0.788638	1.77525e-05	1.06464	2.46704e-05	10.328	0.000179602	0.0338088	0.0450223	0.0314481	0.0394333
		Alfa-Ti_047	4.17638e-06	3.00074	2.8187	29.1101	2.22284	2.233	0.788601	1.62835e-05	1.06458	2.15709e-05	10.3275	0.000176434	-0.0439877	0.0412954	-0.0337507	-0.0379129
		Alfa-Ti_048	1.29939e-05	2.9665	2.78651	28.7783	2.19754	2.20768	0.788633	1.80848e-05	1.06459	2.24236e-05	10.3277	0.000184798	0.0469638	0.0458659	-0.0251996	0.0218316
		Alfa-Ti_049	1.68913e-05	3.02983	2.84582	29.3903	2.24419	2.25428	0.788591	1.54778e-05	1.06466	2.1842e-05	10.3275	0.000157018	-0.0192015	0.0392536	0.0307972	-0.0109412
		Alfa-Ti_050	2.58743e-05	3.01831	2.83501	29.2787	2.23563	2.24565	0.78858	1.91895e-05	1.06465	2.33561e-05	10.3275	0.000184722	-0.0159331	0.0486678	0.00574118	0.00225615
		Alfa-Ti_051	3.20474e-06	3.01989	2.83654	29.2944	2.23687	2.24678	0.788594	1.81289e-05	1.06464	2.4066e-05	10.3275	0.000192653	0.0237341	0.0459788	-0.0169656	0.00185882
		Alfa-Ti_052	-1.68463e-05	3.04288	2.85807	29.5166	2.25379	2.26378	0.78857	1.65087e-05	1.06466	2.08017e-05	10.3274	0.000179938	-0.0402768	0.0418683	0.00868493	-0.0170107
		Alfa-Ti_053	-2.2939e-05	3.05277	2.86736	29.6133	2.26122	2.2711	0.78861	1.52061e-05	1.06467	2.18246e-05	10.3277	0.000168575
2022-02-11	One Grain (Grain One) Profile	Alfa-Ti_001	1.11191e-05	3.55586	3.33652	34.4037	2.6241	2.63768	0.78647	1.98626e-05	1.06573	2.54925e-05	10.3114	0.000882009
		Alfa-Ti_002	1.24932e-05	3.68958	3.46202	35.7039	2.7229	2.73629	0.786499	2.04291e-05	1.06572	2.53314e-05	10.313	0.000217383	0.0222364	0.0519506	0.0176635	0.184179
		Alfa-Ti_003	1.13493e-05	3.70748	3.47897	35.8701	2.7362	2.7496	0.786493	1.64058e-05	1.06567	2.47409e-05	10.3107	0.00130391	0.00788761	0.0417193	-0.0467686	-0.203321
		Alfa-Ti_004	-3.20828e-06	3.64515	3.42034	35.2733	2.69003	2.70349	0.786475	1.85932e-05	1.06573	2.28613e-05	10.3127	0.000197969	-0.0106734	0.0472818	0.0520734	0.169508
		Alfa-Ti_005	-2.63965e-06	3.66969	3.44355	35.5069	2.70827	2.72171	0.786473	1.65627e-05	1.06567	2.13521e-05	10.3112	0.00118524	0.000106746	0.0421188	-0.0450994	-0.0751469
		Alfa-Ti_006	1.43087e-05	3.69575	3.46788	35.7581	2.7274	2.7407	0.786471	1.77104e-05	1.0657	2.31119e-05	10.3113	0.000729258	0.0127995	0.0450381	0.00320566	-0.0414336
		Alfa-Ti_007	-1.23707e-06	3.66767	3.44145	35.4889	2.70654	2.72005	0.786449	1.83447e-05	1.06573	2.3447e-05	10.3122	0.000269162	-0.0429363	0.0466499	0.00689264	0.0356594
		Alfa-Ti_008	4.22521e-06	3.62168	3.39825	35.0441	2.67273	2.68618	0.786495	1.61777e-05	1.06575	2.08308e-05	10.3124	0.000426086	0.0480452	0.0411406	0.0125605	0.201154
		Alfa-Ti_009	2.06454e-05	3.72319	3.49352	36.011	2.74755	2.76088	0.786465	1.77857e-05	1.06573	2.59171e-05	10.3084	0.00198776	-0.0132421	0.0452289	0.00248986	-0.337492
		Alfa-Ti_010	8.61983e-06	3.66647	3.44037	35.4744	2.70572	2.71914	0.786456	1.74562e-05	1.06572	2.37198e-05	10.3114	0.00105524	0.0146477	0.0443928	-0.0029332	0.267853
		Alfa-Ti_011	-2.70388e-05	3.67086	3.44452	35.5077	2.70886	2.72231	0.786424	1.9382e-05	1.0657	2.31319e-05	10.3088	0.0018824	-0.0602724	0.0492885	-0.00879919	-0.318882
		Alfa-Ti_012	1.06936e-05	3.72408	3.49443	36.0377	2.74834	2.76146	0.786486	1.81481e-05	1.06571	2.51234e-05	10.3128	0.000191036	0.0289479	0.046151	0.0167407	0.192807
		Alfa-Ti_013	3.77431e-06	3.71131	3.48255	35.9153	2.73905	2.7522	0.786504	1.6527e-05	1.06568	2.19534e-05	10.3129	0.000191918	0.0280625	0.0420278	-0.002749	0.0153999
		Alfa-Ti_014	5.82812e-06	3.73314	3.5031	36.1263	2.75512	2.76826	0.786477	1.55045e-05	1.06566	1.83721e-05	10.3126	0.000151573	-0.00191897	0.0394277	-0.0305545	0.131579
		Alfa-Ti_015	1.25331e-05	3.67629	3.4496	35.5634	2.71297	2.72613	0.786453	2.09283e-05	1.0657	2.64089e-05	10.3097	0.00124262	-0.0236913	0.0532207	0.0291779	-0.267735
		Alfa-Ti_016	1.23274e-05	3.6302	3.40643	35.128	2.67907	2.69247	0.786466	1.61039e-05	1.06568	2.20104e-05	10.3122	0.000342316	-0.00349874	0.0409525	-0.031578	0.0903704
		Alfa-Ti_017	-2.20807e-07	3.6945	3.46662	35.751	2.72645	2.73971	0.786485	1.56982e-05	1.06573	2.06378e-05	10.3129	0.000165119	0.0101575	0.0399202	0.012915	0.0352569
		Alfa-Ti_018	1.07364e-05	3.70593	3.47727	35.8608	2.73485	2.74806	0.786487	1.70175e-05	1.06575	2.11195e-05	10.3128	0.000178314	0.025697	0.0432759	0.032893	0.0267153
		Alfa-Ti_019	7.82161e-06	3.63509	3.41095	35.1747	2.68257	2.69592	0.78645	1.99264e-05	1.0657	2.39179e-05	10.3123	0.000325348	-0.0425287	0.050672	-0.0195342	-0.0476741
		Alfa-Ti_020	1.50025e-06	3.7357	3.5054	36.15	2.75692	2.77004	0.786479	1.43184e-05	1.06569	2.24913e-05	10.3126	0.000176815	0.00725124	0.0364118	-0.0142852	0.0706749
		Alfa-Ti_021	-2.10305e-05	3.70684	3.47824	35.8657	2.73562	2.74879	0.786497	1.66459e-05	1.06572	2.39524e-05	10.3116	0.000894816	-0.0168788	0.0423286	0.0133301	-0.143433
		Alfa-Ti_022	4.25013e-06	3.74337	3.51254	36.2266	2.76276	2.77572	0.786541	1.76712e-05	1.06571	2.34173e-05	10.3135	0.000187286	0.0502224	0.0449361	0.000533487	0.124706
		Alfa-Ti_023	-3.46557e-06	3.62181	3.3985	35.0482	2.67296	2.68601	0.786506	1.70823e-05	1.0657	2.09472e-05	10.3128	0.000162139	-0.0347429	0.0434368	-0.00880377	-0.039694
		Alfa-Ti_024	6.90638e-06	3.6431	3.41842	35.2542	2.6887	2.70189	0.786527	1.87767e-05	1.06572	2.59533e-05	10.3129	0.000213791	0.0201621	0.0477468	-0.00783223	0.0371513
		Alfa-Ti_025	-1.38538e-06	3.65207	3.42677	35.338	2.69522	2.70836	0.786515	1.98133e-05	1.06574	2.38674e-05	10.3123	0.000645362	-0.00347651	0.0503823	-0.00874155	-0.0373706
		Alfa-Ti_026	-2.70931e-05	3.58709	3.36564	34.7081	2.64713	2.66028	0.786509	1.90295e-05	1.06579	2.29412e-05	10.3124	0.000612927	0.00842618	0.0483901	-0.00213118	-0.0297438
		Alfa-Ti_027	-2.51262e-05	3.58853	3.36683	34.7229	2.64799	2.66129	0.786489	1.51438e-05	1.06584	2.419e-05	10.3132	0.000192231	-0.0429382	0.0385081	0.00458204	0.0297529
		Alfa-Ti_028	3.58437e-06	3.62753	3.4033	35.0995	2.67683	2.68983	0.786537	1.6378e-05	1.06588	2.25484e-05	10.3133	0.000222402	0.0541101	0.0416481	0.0330716	0.0031598
		Alfa-Ti_029	2.23532e-06	3.67606	3.44892	35.5702	2.71258	2.72565	0.7865	1.65906e-05	1.06585	2.43358e-05	10.3134	0.000185343	-0.0320201	0.0421871	0.00248728	0.0420352
		Alfa-Ti_030	-2.35452e-05	3.61502	3.39176	34.9778	2.66768	2.68066	0.786514	1.63022e-05	1.06582	2.10537e-05	10.3126	0.00065694	-0.0103528	0.041454	-0.00127431	-0.0823338
		Alfa-Ti_031	7.60546e-06	3.62369	3.39999	35.066	2.67425	2.68717	0.786543	1.72579e-05	1.06579	2.19266e-05	10.3135	0.000173477	0.0101553	0.0438833	-0.0163275	0.0294558
		Alfa-Ti_032	-4.24038e-06	3.58993	3.3683	34.7403	2.64937	2.6622	0.786557	1.58777e-05	1.06579	2.35906e-05	10.3138	0.000196897	-0.00210988	0.0403726	0.0244439	0.104194
		Alfa-Ti_033	3.1467e-05	3.54884	3.3299	34.3373	2.61922	2.63213	0.786574	1.84575e-05	1.06574	2.48118e-05	10.312	0.00154056	0.0457929	0.0469335	-0.0264849	-0.153431
		Alfa-Ti_034	2.41964e-05	3.51242	3.2957	33.9898	2.59216	2.60506	0.786519	1.96716e-05	1.06575	2.24745e-05	10.3133	0.000215602	-0.055674	0.0500192	0.00486328	0.0495002
		Alfa-Ti_035	3.34226e-06	3.47478	3.26039	33.6265	2.56448	2.5774	0.786551	1.81126e-05	1.06575	2.53202e-05	10.3136	0.000195505	0.00528101	0.046056	-0.00460333	0.0808398
		Alfa-Ti_036	-1.59912e-05	3.64381	3.41898	35.257	2.68929	2.70164	0.786576	1.75504e-05	1.06576	2.30637e-05	10.3122	0.000665049	0.0118821	0.0446252	0.0100082	-0.0857923
		Alfa-Ti_037	3.81117e-06	3.6302	3.40624	35.1272	2.67929	2.69175	0.786581	1.82929e-05	1.06574	2.57755e-05	10.3126	0.000846983	0.0149022	0.0465131	-0.0163511	-0.0324797
		Alfa-Ti_038	4.21072e-06	3.5189	3.30176	34.0535	2.59705	2.60974	0.786563	1.75886e-05	1.06576	2.43807e-05	10.3137	0.000201452	-0.0111204	0.0447221	0.0155914	0.0696141
		Alfa-Ti_039	-5.34437e-06	3.49992	3.28399	33.8689	2.58308	2.59576	0.786563	1.73338e-05	1.06575	2.46195e-05	10.3133	0.000256668	0.012332	0.0440753	0.00429593	-0.0376252
		Alfa-Ti_040	-1.63786e-05	3.48899	3.27379	33.7651	2.57499	2.58797	0.786543	1.789e-05	1.06573	2.41121e-05	10.3137	0.000214708	-0.0293807	0.0454888	0.00227266	0.0397542
		Alfa-Ti_041	1.56116e-05	3.46728	3.2535	33.5545	2.55911	2.57183	0.786569	1.67608e-05	1.0657	2.43371e-05	10.3133	0.000176082	0.0376257	0.042619	-0.0220067	-0.020594
		Alfa-Ti_042	1.76481e-05	3.45665	3.24347	33.451	2.55112	2.56387	0.786536	1.91842e-05	1.06572	2.2752e-05	10.3133	0.000224539	-0.0400693	0.0487795	-0.0165397	-0.0169904
		Alfa-Ti_043	-1.24624e-05	3.47433	3.2599	33.6216	2.56414	2.57691	0.786567	1.97396e-05	1.06578	2.36597e-05	10.3137	0.000188262	0.0325381	0.0501934	0.0401636	0.0324498
		Alfa-Ti_044	-4.66193e-06	3.47085	3.25672	33.5878	2.56157	2.57436	0.786546	1.81585e-05	1.06575	2.06457e-05	10.3134	0.000188885	-0.0149443	0.046172	-0.00132183	0.0905356
		Alfa-Ti_045	1.25594e-05	3.54403	3.32546	34.2892	2.61564	2.62818	0.786548	1.71923e-05	1.06572	2.42468e-05	10.3112	0.0012324	-0.0264103	0.0437147	-0.0318528	-0.219212
		Alfa-Ti_046	6.15239e-06	3.54239	3.3238	34.2801	2.61448	2.62715	0.786592	1.68204e-05	1.06576	2.26822e-05	10.3135	0.000300308	0.042088	0.0427697	0.0407829	0.115001
		Alfa-Ti_047	1.49942e-06	3.52854	3.31096	34.1477	2.60431	2.617	0.78657	1.74666e-05	1.06571	2.19912e-05	10.3135	0.00017042	-0.0401623	0.0444103	-0.0296986	-0.014269
		Alfa-Ti_048	3.22456e-05	3.53459	3.31657	34.2065	2.60886	2.62148	0.786611	1.68781e-05	1.06573	1.99438e-05	10.3138	0.000183662	0.0555035	0.0429159	0.0121607	0.0221193
		Alfa-Ti_049	-1.57819e-05	3.46672	3.25292	33.5494	2.55865	2.57152	0.786565	1.78362e-05	1.06572	2.31194e-05	10.3136	0.000184806	-0.0539442	0.0453498	-0.00140691	-0.0216825
		Alfa-Ti_050	1.36091e-05	3.51345	3.29679	34.0027	2.59328	2.60601	0.786604	1.95125e-05	1.06572	2.36658e-05	10.3139	0.000240623	0.0550033	0.0496147	-0.0202885	0.15662
		Alfa-Ti_051	-1.92841e-05	3.42151	3.2104	33.1016	2.52517	2.5381	0.786556	1.95728e-05	1.06575	2.28611e-05	10.3109	0.00147242	-0.0411586	0.0497663	0.0106432	-0.278251
		Alfa-Ti_052	1.19308e-05	3.57467	3.35406	34.5928	2.63823	2.65066	0.786573	1.87152e-05	1.06577	2.42476e-05	10.3137	0.0002069	0.00828813	0.047587	0.0207499	0.240464
		Alfa-Ti_053	7.50639e-06	3.56849	3.34836	34.5265	2.63375	2.64629	0.786577	1.61731e-05	1.06574	2.18738e-05	10.3115	0.00199357	-0.0172255	0.041122	-0.0125598	-0.203859
		Alfa-Ti_054	1.2417e-05	3.51713	3.30018	34.0365	2.59595	2.6086	0.786607	1.70161e-05	1.06574	2.1644e-05	10.3135	0.000363053	0.0119632	0.0432649	-0.0102412	0.122368
		Alfa-Ti_055	9.93222e-06	3.49885	3.28297	33.8571	2.58246	2.59523	0.78662	2.02984e-05	1.06576	2.4434e-05	10.313	0.000917104	0.02488	0.0516105	0.00839565	-0.00726405
		Alfa-Ti_056	-4.31923e-06	3.48341	3.26847	33.7066	2.57096	2.58375	0.786593	1.88117e-05	1.06576	2.41591e-05	10.3126	0.000948248	-0.0182375	0.0478301	0.0369049	-0.0251083
		Alfa-Ti_057	4.1772e-07	3.41426	3.20382	33.0403	2.52012	2.53296	0.786594	2.0475e-05	1.06568	2.59559e-05	10.3128	0.000528135	0.0323837	0.0520617	-0.0484602	-0.0181712
		Alfa-Ti_058	-3.42036e-06	3.38449	3.17581	32.7534	2.49794	2.51082	0.786545	2.21719e-05	1.06571	2.11395e-05	10.3133	0.000231015	-0.0557579	0.0563749	0.00428425	0.136224
		Alfa-Ti_059	5.03148e-06	3.57222	3.35191	34.5615	2.63656	2.64923	0.786583	1.90616e-05	1.06572	2.42661e-05	10.311	0.00173295	0.0269116	0.0484681	-0.00638555	-0.170654
		Alfa-Ti_060	-3.30528e-06	3.56013	3.34047	34.4479	2.62756	2.64006	0.786579	1.80227e-05	1.06575	2.07314e-05	10.3123	0.000796508	-0.0180797	0.0458246	0.0382465	-0.0192385
		Alfa-Ti_061	2.13909e-05	3.49538	3.27987	33.8285	2.57997	2.59274	0.786604	1.89454e-05	1.0657	2.33565e-05	10.3139	0.000209442	0.030716	0.0481716	-0.0386742	0.0921251
		Alfa-Ti_062	-9.29877e-06	3.474	3.25972	33.6198	2.56404	2.57696	0.78658	1.9999e-05	1.06573	2.28332e-05	10.3137	0.000217188	-0.0347932	0.0508488	0.0215813	-0.0176121
		Alfa-Ti_063	1.6902e-06	3.51031	3.29383	33.9719	2.59097	2.60364	0.786611	1.92547e-05	1.06572	2.20365e-05	10.3138	0.000200579	0.0274542	0.0489575	-0.0014895	0.0166834
		Alfa-Ti_064	4.08389e-06	3.44575	3.23329	33.3467	2.54331	2.5562	0.786599	1.93447e-05	1.06571	2.41773e-05	10.3135	0.000198482	-0.0235268	0.0491846	-0.025632	-0.0265374
		Alfa-Ti_065	-1.37264e-05	3.44678	3.23413	33.3563	2.54405	2.55691	0.786624	2.0075e-05	1.06575	2.46781e-05	10.3138	0.000235408	0.0407615	0.0510429	0.0194652	0.0176559
		Alfa-Ti_066	9.10156e-06	3.57467	3.35412	34.5938	2.63831	2.65082	0.786584	1.82157e-05	1.06575	2.19946e-05	10.3138	0.000194272	-0.0148551	0.0463152	0.0193037	0.00853254
		Alfa-Ti_067	-1.68451e-05	3.49311	3.27772	33.8051	2.57817	2.59089	0.786568	1.98587e-05	1.06571	2.25217e-05	10.3135	0.000194919	-0.0482509	0.0504921	-0.047228	-0.0377257
		Alfa-Ti_068	1.90966e-05	3.51214	3.29538	33.989	2.59224	2.60502	0.786628	2.06724e-05	1.06577	2.51552e-05	10.3141	0.000216607	0.0602482	0.0525626	0.0349931	0.0444742
		Alfa-Ti_069	-1.61159e-05	3.4637	3.24998	33.5195	2.55642	2.56945	0.786593	2.1132e-05	1.06576	2.41689e-05	10.3137	0.000219034	-0.0609466	0.0537273	0.0124549	0.158824
		Alfa-Ti_070	1.09376e-06	3.45912	3.2458	33.4643	2.55333	2.56622	0.786654	2.0203e-05	1.06572	2.35556e-05	10.3101	0.00214672	0.0890835	0.051369	-0.0307341	-0.361851
		Alfa-Ti_071	-8.31377e-06	3.43708	3.22503	33.2628	2.53675	2.54989	0.786575	2.13626e-05	1.06574	2.46437e-05	10.3139	0.000213833	-0.0259853	0.0543166	0.00550644	0.261046
		Alfa-Ti_072	-1.66986e-05	3.41306	3.20246	33.0249	2.51888	2.53202	0.786537	2.21361e-05	1.06576	2.43123e-05	10.3123	0.0010067	-0.0529941	0.0562844	0.012485	-0.141061
		Alfa-Ti_073	-5.11606e-06	3.46067	3.24717	33.4904	2.55418	2.56714	0.786582	1.97687e-05	1.06575	2.66675e-05	10.3137	0.000201639	0.022631	0.050266	-0.015239	0.0664494
		Alfa-Ti_074	9.48644e-06	3.54829	3.32933	34.3377	2.61883	2.63147	0.786592	1.82818e-05	1.06576	2.52807e-05	10.3136	0.000237425	0.026845	0.0464847	0.0195033	-0.0040943
		Alfa-Ti_075	1.31863e-05	3.54184	3.32335	34.2761	2.61401	2.62685	0.786559	1.95498e-05	1.06574	2.00751e-05	10.3137	0.000198895	-0.0349371	0.0497081	-0.00452156	0.0266455
		Alfa-Ti_076	-3.41044e-07	3.50916	3.29271	33.9586	2.59	2.60291	0.786581	1.75055e-05	1.06573	2.17742e-05	10.3132	0.000428971	0.0079841	0.0445107	-0.033746	-0.0569924
		Alfa-Ti_077	3.20201e-05	3.48525	3.2701	33.7276	2.57224	2.58516	0.786591	2.00307e-05	1.06579	2.51847e-05	10.3139	0.00021028	-0.0237953	0.0509292	0.0358566	0.0893639
		Alfa-Ti_078	-6.68027e-06	3.48486	3.26979	33.7207	2.57214	2.58501	0.786638	1.88141e-05	1.06577	2.12422e-05	10.3127	0.000960446	0.0647427	0.0478374	0.0119533	-0.107888
		Alfa-Ti_079	2.64259e-05	3.43479	3.22294	33.2408	2.53512	2.54809	0.786583	2.22226e-05	1.06573	2.47584e-05	10.3138	0.000209346

## Sheet: KNW
Time	Grain	Sample	44Ca	46Ti	47Ti	48Ti	49Ti	50Ti	49Ti/47Ti	se	46Ti/47Ti	se	48Ti/47Ti	se	δ49/47Ti	2se	δ46/47Ti	δ48/47Ti
2022-02-14	One Grain Profile	KNW_001	-8.49565e-06	4.17486	3.91791	40.408	3.0814	3.09972	0.78649	1.71771e-05	1.06558	2.47299e-05	10.3136	0.00018221
		KNW_002	-4.97228e-06	4.20025	3.94163	40.6522	3.1	3.1181	0.786477	1.57348e-05	1.06561	2.1323e-05	10.3135	0.000161559	0.00118475	0.0400133	0.0127416	0.00259583
		KNW_003	7.12867e-06	4.20669	3.94768	40.7139	3.1047	3.12254	0.786462	1.43844e-05	1.06561	1.90167e-05	10.3134	0.000148996	-0.0317179	0.0365789	-0.0312002	-0.0294692
		KNW_004	-1.44929e-05	4.14612	3.89059	40.127	3.05994	3.0775	0.786497	1.50495e-05	1.06568	2.20471e-05	10.3138	0.00017141	0.06332	0.0382721	0.0363203	0.0456627
		KNW_005	2.88122e-05	4.14803	3.89242	40.1439	3.06113	3.07839	0.786432	1.59012e-05	1.06567	2.19597e-05	10.3133	0.000165337	-0.00855878	0.0404384	-0.0196671	-0.00862033
		KNW_006	-1.07061e-06	4.10967	3.85631	39.7703	3.03253	3.04949	0.786381	1.64491e-05	1.0657	2.47228e-05	10.313	0.000172272	-0.0271988	0.0418339	-0.0131909	-0.0113233
		KNW_007	4.48086e-06	4.13903	3.88364	40.0518	3.05399	3.07054	0.786372	1.83499e-05	1.06576	2.38046e-05	10.3129	0.0001932	-0.00161904	0.0466698	0.013257	-0.00137499
		KNW_008	-8.36341e-06	4.13912	3.88361	40.0513	3.05394	3.07028	0.786366	1.76303e-05	1.06579	2.37811e-05	10.3129	0.000184962	0.0621504	0.0448427	-0.0136791	0.0419679
		KNW_009	-1.74791e-08	4.11956	3.86504	39.8562	3.03894	3.05491	0.786262	1.87015e-05	1.06585	2.62221e-05	10.312	0.000196257	-0.0895019	0.0475664	0.0410149	-0.0662521
		KNW_010	1.55171e-05	4.13958	3.88392	40.0526	3.05392	3.06988	0.786299	1.86949e-05	1.06582	2.52954e-05	10.3124	0.000199999	0.0340814	0.0475533	-0.036255	0.130087
		KNW_011	-1.56874e-05	4.1143	3.86002	39.7972	3.03507	3.05068	0.786283	1.60386e-05	1.06587	2.42602e-05	10.3102	0.00161755	-0.0103665	0.0407955	0.0263579	-0.213068
		KNW_012	-2.30759e-05	4.10359	3.84999	39.7025	3.02718	3.04257	0.786283	1.73132e-05	1.06587	2.5826e-05	10.3123	0.000199804	0.00688982	0.0440384	-0.0233714	0.103872
		KNW_013	-8.21955e-06	4.0641	3.81278	39.3188	2.99788	3.013	0.786271	1.63482e-05	1.06591	2.35117e-05	10.3124	0.000172616	0.03206	0.0415854	0.0190201	0.0175559
		KNW_014	1.20614e-05	4.08336	3.83084	39.5037	3.01185	3.02667	0.78621	1.7248e-05	1.06592	2.47342e-05	10.312	0.000186815	-0.0109707	0.0438759	-0.0196064	-0.0100827
		KNW_015	2.86371e-05	4.09058	3.83745	39.5713	3.01687	3.03179	0.786166	1.81313e-05	1.06596	2.48482e-05	10.3119	0.000177566	-0.043829	0.0461238	0.00731648	-0.00640867
		KNW_016	4.48499e-06	4.05591	3.80482	39.2348	2.99131	3.00615	0.78619	1.53833e-05	1.06599	2.1519e-05	10.3119	0.000181902	0.0167469	0.0391344	0.0087584	-0.00104502
		KNW_017	3.15243e-06	4.05857	3.80727	39.2602	2.99323	3.00789	0.786189	1.7902e-05	1.066	2.33792e-05	10.3119	0.000191401	0.00923215	0.0455415	-0.00271146	0.0036499
		KNW_018	-9.89005e-06	4.0457	3.79514	39.1349	2.98364	2.99797	0.786172	1.53708e-05	1.06602	2.24398e-05	10.3118	0.000165371	0.0210155	0.0391036	0.00128662	0.0108016
		KNW_019	6.23286e-06	4.02933	3.77973	38.975	2.97134	2.98541	0.786123	1.55955e-05	1.06603	2.23637e-05	10.3116	0.000176072	-0.0599048	0.0396747	-0.0113059	-0.027957
		KNW_020	-3.76174e-06	4.00764	3.75925	38.7649	2.95541	2.96921	0.786168	1.58418e-05	1.06607	2.37199e-05	10.3119	0.000170813	0.069547	0.0403041	0.0137052	0.0354748
		KNW_021	2.53824e-05	4.00078	3.75278	38.6966	2.95008	2.96371	0.786104	1.88932e-05	1.06608	2.50575e-05	10.3114	0.000205905	-0.0750457	0.0480643	0.00248022	-0.0436796
		KNW_022	-5.59885e-06	3.96772	3.72176	38.3784	2.92589	2.93925	0.786157	1.69528e-05	1.06608	2.41215e-05	10.3119	0.00017994	0.070118	0.0431312	-0.00658191	0.0481244
		KNW_023	8.58439e-06	3.9616	3.71596	38.3166	2.92112	2.93449	0.7861	1.64949e-05	1.0661	2.11705e-05	10.3114	0.000171476	-0.033939	0.041965	-0.0100792	-0.0369214
		KNW_024	1.17503e-05	3.9567	3.71123	38.2687	2.91739	2.9306	0.786097	1.9505e-05	1.06614	2.62929e-05	10.3116	0.000203304	-0.0146567	0.0496243	0.0252857	0.0221465
		KNW_025	2.25756e-05	3.9511	3.70603	38.2143	2.91337	2.92622	0.786117	1.61466e-05	1.06613	2.41089e-05	10.3114	0.00020454	0.0315043	0.0410807	0.0107676	-0.0169298
		KNW_026	-1.97414e-05	3.94357	3.6991	38.1432	2.90781	2.9207	0.786087	1.55147e-05	1.06609	2.2896e-05	10.3115	0.000176646	-0.00927726	0.039473	-0.0658942	0.0107369
		KNW_027	-1.81817e-05	3.94862	3.70348	38.1881	2.9112	2.92418	0.786072	1.61638e-05	1.06619	2.52036e-05	10.3114	0.000181178	-0.0146202	0.041125	0.0724313	0.00503595
		KNW_028	-7.60025e-06	3.91854	3.67544	37.8982	2.88919	2.90189	0.78608	1.74291e-05	1.06614	2.67224e-05	10.3112	0.000196109	-0.00759	0.0443441	-0.0277674	-0.0214072
		KNW_029	1.47383e-07	3.90105	3.65901	37.7297	2.87635	2.88885	0.786099	1.71648e-05	1.06615	2.53066e-05	10.3114	0.000178813	0.0287285	0.0436721	-0.00555746	0.0206169
		KNW_030	8.26037e-06	3.89706	3.6552	37.6898	2.87326	2.88558	0.786074	1.73735e-05	1.06617	2.39538e-05	10.3113	0.000179245	-0.0225051	0.0442023	0.00197528	-0.0202896
		KNW_031	1.0946e-05	3.88711	3.64582	37.5939	2.86592	2.87819	0.786084	1.86431e-05	1.06618	2.48967e-05	10.3115	0.000191654
2022-02-14	One Grain Profile	KNW_001	2.44124e-05	3.83678	3.59873	37.1096	2.82906	2.8407	0.786127	1.69072e-05	1.06615	2.52428e-05	10.3118	0.000185888
		KNW_002	-1.54794e-05	3.893	3.65162	37.6562	2.8708	2.88264	0.786172	1.9145e-05	1.0661	2.24967e-05	10.3122	0.000180322	0.023164	0.0487054	-0.0432059	0.018823
		KNW_003	2.03681e-05	3.88592	3.64482	37.5859	2.86549	2.87726	0.786181	1.78156e-05	1.06615	2.52493e-05	10.3121	0.000179213	0.0360567	0.0453236	0.0169148	0.010164
		KNW_004	8.63185e-06	3.88885	3.64752	37.6129	2.86744	2.87914	0.786132	1.76867e-05	1.06616	2.53656e-05	10.3119	0.000189676	-0.0553886	0.0449943	0.0141342	-0.0242085
		KNW_005	9.38152e-06	3.86065	3.62114	37.3417	2.84684	2.85841	0.786171	1.61013e-05	1.06614	2.11543e-05	10.3121	0.000137834	0.0405475	0.040963	-0.0327269	0.0276991
		KNW_006	-8.29858e-06	3.84569	3.60693	37.194	2.83558	2.84694	0.786146	1.77352e-05	1.06619	2.44955e-05	10.3118	0.000178506	0.011134	0.0451198	0.0262448	0.00353683
		KNW_007	-4.36225e-07	3.84309	3.60451	37.1676	2.83352	2.84486	0.786104	1.70449e-05	1.06619	2.16798e-05	10.3114	0.00018357	-0.0615994	0.0433628	0.00800732	-0.0459199
		KNW_008	-6.7304e-06	3.80438	3.56827	36.7959	2.80523	2.81658	0.786158	1.82394e-05	1.06617	2.61429e-05	10.312	0.000182639	0.0559721	0.046404	-0.00630828	0.0344645
		KNW_009	-1.47802e-05	3.81786	3.58094	36.926	2.81507	2.82652	0.786125	1.69822e-05	1.06616	2.12797e-05	10.3118	0.000172018	-0.0155216	0.0432041	-0.0229354	-0.00447751
		KNW_010	-1.74012e-05	3.87756	3.6368	37.5017	2.85894	2.87047	0.786115	1.84379e-05	1.0662	2.3959e-05	10.3117	0.000177807	0.0126441	0.0469095	0.00156433	-0.00307765
		KNW_011	-1.9041e-06	3.80312	3.56686	36.7805	2.80386	2.81531	0.786086	1.90041e-05	1.06624	2.7398e-05	10.3117	0.000201384	-0.0258754	0.0483499	0.0311239	0.00202085
		KNW_012	-2.73975e-06	3.80333	3.56715	36.7833	2.80413	2.81558	0.786098	1.6688e-05	1.06621	2.57969e-05	10.3117	0.000172315	0.0590971	0.0424604	-0.0269504	0.0362981
		KNW_013	1.28728e-05	3.80837	3.57178	36.8282	2.80748	2.81903	0.786017	1.81536e-05	1.06624	2.72251e-05	10.3109	0.000188592	-0.0982381	0.0461868	0.019955	-0.0719623
		KNW_014	3.10937e-06	3.81089	3.57419	36.8555	2.80964	2.821	0.78609	1.7217e-05	1.06622	2.51996e-05	10.3116	0.000171012	0.0833729	0.0438077	-0.00617958	0.0582561
		KNW_015	8.16906e-06	3.64733	3.4208	35.272	2.68886	2.69961	0.786032	1.7357e-05	1.06622	2.68818e-05	10.311	0.000214636	-0.0718651	0.0441605	-0.000483406	-0.0478919
		KNW_016	2.82164e-06	3.78111	3.54626	36.5674	2.78767	2.79825	0.786087	1.94235e-05	1.06622	2.65285e-05	10.3115	0.000180556	0.0510919	0.0494207	-0.00336194	0.0353627
		KNW_017	6.45782e-06	3.80043	3.56436	36.7531	2.80181	2.81257	0.786062	1.67019e-05	1.06623	2.21722e-05	10.3113	0.000180677	-0.0283193	0.042494	0.00297946	-0.0267177
		KNW_018	7.76356e-06	3.80275	3.56653	36.7765	2.80359	2.81448	0.786081	1.8216e-05	1.06623	2.60488e-05	10.3116	0.00018402	0.0429569	0.0463483	-0.0117072	0.040993
		KNW_019	7.19579e-06	3.73003	3.49825	36.0705	2.74974	2.76028	0.786033	1.83719e-05	1.06626	2.47582e-05	10.311	0.000191549	-0.0514246	0.0467435	0.0277992	-0.0372245
		KNW_020	-5.30304e-06	3.78907	3.55373	36.6433	2.79346	2.80459	0.786066	1.92973e-05	1.06622	2.6725e-05	10.3112	0.000184026	0.0382526	0.0491003	-0.0121762	0.0091709
		KNW_021	7.38495e-06	3.7983	3.56242	36.733	2.8002	2.8116	0.786038	1.61103e-05	1.06621	2.29021e-05	10.3113	0.000176213	-0.0247395	0.0409902	-0.0152563	0.00457969
		KNW_022	-1.15603e-05	3.77155	3.53724	36.4732	2.78045	2.79164	0.786049	1.62831e-05	1.06624	2.33375e-05	10.3112	0.000173043	0.0121316	0.0414306	0.00331119	-0.00657952
		KNW_023	-2.44633e-05	3.76837	3.5342	36.442	2.77803	2.78913	0.786042	1.78109e-05	1.06626	2.55038e-05	10.3113	0.00020358	-0.0350802	0.0453163	0.0195895	-0.0191337
		KNW_024	1.5233e-06	3.80836	3.57178	36.8312	2.80774	2.81885	0.786089	1.56797e-05	1.06623	2.15132e-05	10.3117	0.00017081	0.0242993	0.0398938	0.00727325	0.0258777
		KNW_025	2.38828e-06	3.78328	3.54839	36.5897	2.78938	2.80038	0.786098	1.83023e-05	1.06619	2.52966e-05	10.3116	0.000179422	0.0214355	0.0465658	-0.0361187	0.00343444
		KNW_026	-6.84876e-06	3.77392	3.53948	36.4974	2.7823	2.79318	0.786074	1.70473e-05	1.06623	2.51355e-05	10.3115	0.000182844	0.0214977	0.0433743	0.00860019	0.0195626
		KNW_027	-1.36125e-05	3.78256	3.54752	36.5784	2.78841	2.79919	0.786016	1.74998e-05	1.06625	2.34734e-05	10.311	0.000177004	-0.048897	0.0445257	0.0294354	-0.038453
		KNW_028	-2.24855e-05	3.80701	3.5706	36.8172	2.80661	2.81747	0.786034	1.69205e-05	1.06621	2.37088e-05	10.3112	0.000170404	-0.00934653	0.0430524	-0.0307601	0.00357023
		KNW_029	-8.06627e-06	3.78364	3.54861	36.5911	2.78945	2.80018	0.786068	1.79869e-05	1.06623	2.59045e-05	10.3114	0.000186094	0.0186679	0.0457651	0.0270437	0.010722
		KNW_030	-2.52076e-05	3.78228	3.54745	36.579	2.78855	2.79927	0.786072	1.79211e-05	1.0662	2.59434e-05	10.3113	0.000194142	-0.0251366	0.0455954	-0.00616469	-0.0227511
		KNW_031	-1.23207e-05	3.7975	3.5618	36.7285	2.79998	2.81084	0.786115	1.50025e-05	1.06617	2.26676e-05	10.3118	0.000152323
2022-02-15	One Grain Profile	KNW_001	8.90731e-06	3.9782	3.73275	38.495	2.93551	2.95048	0.78642	1.88867e-05	1.06575	2.53676e-05	10.3128	0.000190293
		KNW_002	2.27645e-05	3.96455	3.71952	38.3591	2.9249	2.9396	0.786366	1.80464e-05	1.06588	2.40222e-05	10.3129	0.000180594	-0.051162	0.0458958	0.0541285	0.0130027
		KNW_003	5.51843e-06	3.97431	3.72865	38.4529	2.93218	2.94656	0.786392	1.72422e-05	1.06588	2.37151e-05	10.3128	0.000190384	0.0421475	0.0438532	0.00750817	-0.00790597
		KNW_004	-5.55865e-06	3.92975	3.68688	38.0223	2.89919	2.91348	0.786352	1.55418e-05	1.06587	2.47e-05	10.3129	0.000183982	-0.0039826	0.0395288	-0.0227003	0.00841389
		KNW_005	7.17269e-06	3.91313	3.67116	37.8596	2.8867	2.90068	0.786318	1.94069e-05	1.06591	2.29257e-05	10.3127	0.000192197	-0.0166574	0.0493606	-0.00599898	0.00321565
		KNW_006	-1.34035e-06	3.92854	3.68544	38.0062	2.8979	2.91173	0.786311	1.75388e-05	1.06596	2.66177e-05	10.3125	0.000192637	0.0163674	0.044611	0.019383	-0.000612077
		KNW_007	-4.38264e-06	3.86018	3.62128	37.3439	2.84733	2.86087	0.786278	1.66637e-05	1.06597	2.39907e-05	10.3123	0.000170067	0.0211719	0.0423873	0.0230726	0.0266153
		KNW_008	1.15019e-05	3.86504	3.62597	37.3895	2.85077	2.86423	0.786211	1.6796e-05	1.06593	2.43587e-05	10.3116	0.000171436	-0.0190169	0.0427257	-0.0716919	-0.0352856
		KNW_009	-1.72462e-05	3.72967	3.4986	36.0762	2.75051	2.76393	0.786174	1.75545e-05	1.06605	2.1968e-05	10.3116	0.000172361	-0.0228531	0.0446571	0.0755142	0.00256087
		KNW_010	1.29876e-05	3.70855	3.47895	35.8733	2.73506	2.74824	0.786174	2.10867e-05	1.066	2.46545e-05	10.3115	0.000200458	-0.0230967	0.0536425	-0.0362381	-0.0174564
		KNW_011	1.84879e-05	3.76293	3.52986	36.3994	2.77521	2.78811	0.786209	1.597e-05	1.06603	2.54086e-05	10.3118	0.000170902	0.0385796	0.0406269	0.00300531	0.0152854
		KNW_012	1.77999e-06	3.79715	3.56188	36.7295	2.8003	2.81263	0.786184	1.90886e-05	1.06605	2.44972e-05	10.3118	0.000194121	-0.0196236	0.0485592	0.0166139	-0.000128989
		KNW_013	-7.25515e-06	3.83474	3.59718	37.0935	2.82807	2.84055	0.78619	1.84257e-05	1.06604	2.49808e-05	10.3118	0.000187241	0.0220574	0.0468746	-0.0341582	-0.00258294
		KNW_014	4.96961e-06	3.87073	3.63074	37.4396	2.85435	2.86677	0.786161	1.54976e-05	1.0661	2.3135e-05	10.3119	0.000179899	-0.0119618	0.0394256	0.0307605	0.0145164
		KNW_015	8.66938e-06	3.81678	3.58015	36.9171	2.81454	2.82672	0.786151	1.59131e-05	1.06609	2.4801e-05	10.3116	0.000174746	0.0173654	0.0404843	0.0129023	-0.00876507
		KNW_016	-4.98628e-06	3.80346	3.56777	36.7891	2.80467	2.81682	0.786113	1.69719e-05	1.06606	2.17459e-05	10.3115	0.000185686	-0.0609392	0.0431765	-0.0418508	-0.0275711
		KNW_017	-1.04209e-05	3.84927	3.61054	37.2319	2.8385	2.85047	0.786172	1.60028e-05	1.06612	2.287e-05	10.312	0.000170273	0.0731676	0.0407136	0.0479464	0.0714024
		KNW_018	2.92237e-06	3.71312	3.48297	35.913	2.73802	2.74976	0.786115	1.86624e-05	1.06607	2.79012e-05	10.311	0.000346533	-0.0775301	0.0474763	-0.0442828	-0.0833919
		KNW_019	7.33665e-06	3.77644	3.54222	36.5266	2.78483	2.79644	0.786181	1.7319e-05	1.06612	2.59009e-05	10.3118	0.000189859	0.0860797	0.0440625	0.021452	0.0588986
		KNW_020	-3.21759e-06	3.74518	3.51288	36.2223	2.76151	2.77311	0.786111	1.83094e-05	1.06613	2.45529e-05	10.3113	0.000184319	-0.0620088	0.0465795	0.0103289	-0.032599
		KNW_021	-1.6387e-05	3.77404	3.54001	36.5028	2.78294	2.79439	0.786138	1.73968e-05	1.06611	2.31638e-05	10.3115	0.000187272
2022-02-15	One Grain Profile	KNW_001	8.29068e-06	3.75736	3.52468	36.3472	2.77112	2.78269	0.786203	1.93657e-05	1.06601	2.49315e-05	10.3122	0.000204124
		KNW_002	8.33276e-06	3.71788	3.4874	35.9614	2.74163	2.753	0.786154	1.63833e-05	1.06609	2.52048e-05	10.3118	0.000179613	-0.0509441	0.0416776	0.0319884	-0.0194245
		KNW_003	-1.54712e-05	3.75714	3.52419	36.341	2.77067	2.78204	0.786186	1.66718e-05	1.0661	2.02711e-05	10.3118	0.000166344	0.0535621	0.0424141	0.00481516	0.00921359
		KNW_004	1.30965e-05	3.69526	3.46615	35.7419	2.72485	2.73616	0.786133	1.82295e-05	1.0661	2.61352e-05	10.3117	0.000205085	-0.0431541	0.0463757	0.0100533	-0.00682454
		KNW_005	1.43394e-05	3.65363	3.42718	35.34	2.69427	2.7055	0.786148	1.74422e-05	1.06607	2.471e-05	10.3117	0.000188701	0.042028	0.0443758	-0.0388006	0.0215699
		KNW_006	6.80722e-06	3.62838	3.4033	35.0923	2.67533	2.6865	0.786097	1.80566e-05	1.06614	2.82306e-05	10.3112	0.000200417	-0.0267032	0.0459385	0.0355094	-0.0185804
		KNW_007	2.03127e-05	3.62654	3.40162	35.0747	2.67398	2.68518	0.786088	1.87932e-05	1.06612	2.57892e-05	10.3112	0.000214271	-0.0599523	0.0478116	-0.00525943	-0.0352241
		KNW_008	2.4706e-05	3.73831	3.50647	36.1581	2.75669	2.76785	0.786173	1.70838e-05	1.06612	2.6109e-05	10.3118	0.000182175	0.0959922	0.0434649	0.00467563	0.0463608
		KNW_009	-2.63008e-06	3.70459	3.47489	35.8315	2.73164	2.74282	0.786107	1.45516e-05	1.0661	2.18952e-05	10.3115	0.0001693	-0.0498775	0.03702	-0.0155996	-0.00394964
		KNW_010	2.78421e-07	3.68105	3.45275	35.6024	2.71428	2.72522	0.78612	1.72346e-05	1.06612	2.3094e-05	10.3113	0.000174585	0.035096	0.0438489	0.00771809	-0.00118321
		KNW_011	-4.34544e-06	3.67847	3.45032	35.5767	2.71222	2.72316	0.786078	1.52477e-05	1.06612	2.21202e-05	10.3111	0.000172623	-0.0261802	0.0387934	-0.00997296	-0.0189509
		KNW_012	-7.16159e-06	3.58749	3.36491	34.6967	2.64507	2.656	0.786076	1.98013e-05	1.06615	2.48692e-05	10.3113	0.000199547	-0.0237606	0.050379	0.00959844	0.0110657
		KNW_013	-2.29935e-06	3.62181	3.39709	35.0284	2.6705	2.68133	0.786112	1.84612e-05	1.06615	2.42279e-05	10.3113	0.000167766	0.0458232	0.0469705	-0.00860809	-0.00186412
		KNW_014	-7.75844e-07	3.64002	3.41409	35.2038	2.68374	2.69458	0.786076	1.85238e-05	1.06617	2.71551e-05	10.3113	0.000203664	-0.0609234	0.0471268	0.0339193	-0.0167825
		KNW_015	-1.18878e-05	3.67374	3.44588	35.5328	2.70893	2.7197	0.786136	1.73832e-05	1.06612	2.43693e-05	10.3117	0.000194664	0.0889534	0.0442283	-0.0202172	0.0393409
		KNW_016	1.55185e-05	3.63789	3.41228	35.1848	2.68225	2.69308	0.786056	1.78049e-05	1.06612	2.51708e-05	10.3112	0.000182537	-0.062211	0.0452991	-0.0303362	-0.0086989
		KNW_017	1.60197e-05	3.5839	3.36146	34.6597	2.64236	2.65307	0.786074	1.68721e-05	1.06617	2.45277e-05	10.3109	0.000410586	0.00966039	0.042928	0.0224257	-0.0279924
		KNW_018	-1.19426e-05	3.58201	3.35966	34.6422	2.64095	2.65155	0.786076	1.73858e-05	1.06618	2.3792e-05	10.3112	0.00018843	0.0106817	0.0442349	0.0211527	0.013738
		KNW_019	2.86893e-05	3.55413	3.33362	34.3738	2.62044	2.63106	0.786062	1.70531e-05	1.06615	2.61335e-05	10.3112	0.00018616	-0.021665	0.0433876	-0.0262071	0.00220304
		KNW_020	1.64984e-06	3.53753	3.31799	34.2125	2.60821	2.61883	0.786082	1.60564e-05	1.06617	2.47657e-05	10.3112	0.00017033	0.0374927	0.0408533	-0.0100005	0.00917099
		KNW_021	4.07579e-06	3.52877	3.30964	34.1258	2.60152	2.61209	0.786043	2.06883e-05	1.06621	2.57128e-05	10.311	0.000202646
2022-02-15	One Grain Profile	KNW_001	4.65697e-06	3.66814	3.44068	35.4807	2.70496	2.71553	0.786167	1.85289e-05	1.06611	2.49018e-05	10.3121	0.000197987
		KNW_002	-5.15647e-06	3.71387	3.48352	35.9222	2.73867	2.74917	0.786178	1.68349e-05	1.06612	2.55755e-05	10.312	0.000185849	0.0477929	0.0428291	-0.0168302	0.0160932
		KNW_003	1.79189e-06	3.59283	3.36984	34.7485	2.64908	2.65946	0.786115	1.80155e-05	1.06617	2.48694e-05	10.3116	0.000188437	-0.0122981	0.0458338	0.0198498	0.000472686
		KNW_004	-1.20685e-05	3.56894	3.34739	34.5157	2.63129	2.64154	0.78607	1.7752e-05	1.06618	2.74841e-05	10.3112	0.000202468	0.00688474	0.0451668	0.00123924	-0.00584537
		KNW_005	1.72087e-05	3.57261	3.35082	34.5501	2.6338	2.64418	0.786015	1.85474e-05	1.06619	2.51719e-05	10.3109	0.000192204	-0.0982061	0.0471888	0.0194939	-0.0403071
		KNW_006	-7.57236e-06	3.55781	3.33705	34.4099	2.6233	2.63357	0.786114	1.96647e-05	1.06615	2.63723e-05	10.3115	0.000204057	0.0784539	0.0500339	-0.0153342	0.0290639
		KNW_007	-2.15138e-05	3.49757	3.28056	33.8272	2.57882	2.58911	0.78609	1.89785e-05	1.06615	2.60249e-05	10.3114	0.000178461	-0.00660126	0.0482855	0.000326262	3.28518e-06
		KNW_008	-2.95444e-05	3.5644	3.34324	34.4733	2.62805	2.63835	0.786076	1.81205e-05	1.06615	2.60014e-05	10.3113	0.000200626	-0.0235953	0.0461027	-0.00786548	-0.00561125
		KNW_009	-8.71201e-06	3.6033	3.37969	34.8493	2.65677	2.66718	0.7861	1.87083e-05	1.06616	2.39884e-05	10.3114	0.000187224	0.0121053	0.0475983	-0.019208	-0.00989698
		KNW_010	1.153e-05	3.51824	3.29974	34.0258	2.59394	2.60406	0.786104	1.96154e-05	1.06622	2.64527e-05	10.3117	0.000195324	0.0485693	0.0499078	0.0520048	0.0346068
		KNW_011	6.47221e-06	3.51563	3.29747	34.0009	2.59191	2.60224	0.786032	1.72059e-05	1.06616	2.48536e-05	10.3112	0.000185261	-0.0629212	0.0437764	-0.0526584	-0.0232555
		KNW_012	1.1379e-05	3.53268	3.31328	34.164	2.60444	2.61463	0.786059	1.70783e-05	1.06622	2.73465e-05	10.3112	0.000194429	0.0118946	0.0434534	0.0496167	-0.00511312
		KNW_013	3.24971e-05	3.50271	3.28533	33.8762	2.58249	2.59273	0.786067	1.64679e-05	1.06617	2.27751e-05	10.3114	0.000166615	-0.0201132	0.0418987	-0.0455821	0.0234767
		KNW_014	1.40651e-07	3.53493	3.31539	34.185	2.60626	2.61618	0.786106	2.11543e-05	1.06621	2.54297e-05	10.311	0.000435581	0.0308278	0.0538221	0.0572603	-0.0352292
		KNW_015	2.00471e-05	3.50439	3.28698	33.8933	2.58389	2.59376	0.786098	1.86731e-05	1.06614	2.51253e-05	10.3114	0.000202781	-0.0335322	0.0475068	-0.0511275	0.000780649
		KNW_016	3.63148e-06	3.53181	3.31259	34.1586	2.60417	2.61401	0.786142	1.70425e-05	1.06617	2.35711e-05	10.3117	0.000171944	0.0924684	0.0433614	0.00842297	0.0519508
		KNW_017	-9.09023e-07	3.55781	3.33693	34.4072	2.62297	2.6327	0.78604	1.68864e-05	1.06619	2.41977e-05	10.311	0.000191171	-0.0926195	0.0429617	0.022037	-0.0589332
		KNW_018	2.52507e-06	3.54573	3.3257	34.2931	2.61429	2.62413	0.786085	1.65529e-05	1.06616	2.41657e-05	10.3115	0.00016927	0.04483	0.0421168	-0.00449398	0.0385754
		KNW_019	2.31263e-05	3.52774	3.30888	34.1187	2.60098	2.61084	0.786058	1.56097e-05	1.06614	2.5046e-05	10.3112	0.000186869	-0.016047	0.0397158	-0.0386825	-0.016879
		KNW_020	1.00251e-05	3.41622	3.2041	33.0384	2.51861	2.52829	0.786058	1.94565e-05	1.0662	2.65461e-05	10.3113	0.000195158	-0.0194966	0.0495031	0.041767	-0.0054073
		KNW_021	1.73996e-05	3.51298	3.29494	33.9756	2.59011	2.59989	0.786087	1.68721e-05	1.06617	2.58342e-05	10.3114	0.000185361
2022-02-16	One Grain Profile	KNW_001	-7.46424e-06	3.62251	3.39866	35.0454	2.67213	2.68875	0.786232	1.66075e-05	1.06586	2.51261e-05	10.3115	0.000192216
		KNW_002	-1.2851e-05	3.58444	3.3628	34.6747	2.64385	2.65938	0.786205	1.72313e-05	1.06591	2.19164e-05	10.3113	0.000161724	-0.00828263	0.0438337	0.000695892	-0.0150223
		KNW_003	2.2976e-06	3.56393	3.34343	34.4752	2.62857	2.64366	0.786192	1.60106e-05	1.06595	2.31848e-05	10.3113	0.00015588	0.0194045	0.0407303	0.00167765	0.00990242
		KNW_004	1.65328e-05	3.57189	3.35077	34.5505	2.6342	2.64859	0.786148	1.80538e-05	1.06599	2.29315e-05	10.3112	0.000174805	-0.0208314	0.0459289	0.0055194	-0.00576425
		KNW_005	-7.93876e-06	3.55689	3.33662	34.4044	2.62304	2.63692	0.786137	1.87292e-05	1.06602	2.6787e-05	10.3112	0.000194182	0.0062067	0.0476491	0.0160342	0.00352979
		KNW_006	2.45443e-05	3.5636	3.34293	34.4692	2.62793	2.64138	0.786116	1.54338e-05	1.06601	2.44855e-05	10.3111	0.000184771	-0.014508	0.0392655	-0.0138031	-0.0108566
		KNW_007	2.49656e-05	3.55025	3.33034	34.3397	2.61804	2.63118	0.786117	1.68637e-05	1.06603	2.43659e-05	10.3112	0.000177593	-0.0103817	0.0429032	0.00882158	0.00648054
		KNW_008	5.75591e-06	3.5375	3.31837	34.2163	2.60869	2.6214	0.786136	1.60309e-05	1.06603	2.09042e-05	10.3112	0.000156443	0.00710546	0.0407843	-0.0132289	-0.00490638
		KNW_009	1.75673e-05	3.54444	3.32478	34.2827	2.61375	2.6261	0.786143	1.9689e-05	1.06607	2.36343e-05	10.3113	0.000177004	0.0455942	0.0500923	-0.000806973	0.0165005
		KNW_010	1.35515e-05	3.57113	3.34971	34.5389	2.63313	2.6453	0.786078	1.57945e-05	1.0661	2.00017e-05	10.311	0.000169057	-0.0354784	0.0401842	0.0297185	0.000486933
		KNW_011	-2.08233e-06	3.52559	3.30709	34.0986	2.5996	2.61146	0.786069	1.63078e-05	1.06607	2.33908e-05	10.3107	0.00018336	-0.0205273	0.0414911	-0.0466987	-0.0297455
		KNW_012	-1.57255e-06	3.55009	3.32986	34.3345	2.61758	2.62898	0.786092	1.85378e-05	1.06614	2.18068e-05	10.3111	0.000174255	0.0613492	0.0471674	0.0449531	0.037012
		KNW_013	4.60237e-06	3.52254	3.30409	34.0675	2.59708	2.60825	0.786019	1.86167e-05	1.06611	2.44002e-05	10.3107	0.000190449	-0.0278842	0.0473683	-0.0327897	-0.00587831
		KNW_014	-4.86647e-06	3.45345	3.23916	33.397	2.54595	2.5569	0.78599	1.85589e-05	1.06616	2.66046e-05	10.3104	0.000179986	-0.0378599	0.0472224	0.0173313	-0.036105
		KNW_015	-2.48741e-06	3.48771	3.27127	33.7296	2.57129	2.58214	0.78602	1.92443e-05	1.06616	2.41967e-05	10.3108	0.000197073	0.0107654	0.0489668	0.0143976	0.0338345
		KNW_016	-3.43071e-06	3.51865	3.30036	34.0288	2.5942	2.60503	0.786034	1.8856e-05	1.06614	2.42183e-05	10.3106	0.000193272	0.0235856	0.0479787	-0.031649	-0.0112977
		KNW_017	2.9335e-06	3.5125	3.29447	33.968	2.58949	2.60014	0.78601	2.01835e-05	1.06618	2.21385e-05	10.3106	0.000192871	-0.0119942	0.0513561	0.0185338	0.0051047
		KNW_018	1.97246e-05	3.46719	3.25195	33.5292	2.55605	2.56643	0.786005	1.78859e-05	1.06619	2.4162e-05	10.3105	0.000166365	0.0195322	0.0455117	0.00276586	0.0081816
		KNW_019	8.15727e-06	3.48914	3.27254	33.7406	2.57212	2.58237	0.78597	1.72016e-05	1.06618	2.34402e-05	10.3102	0.000209831	-0.0293749	0.0437704	-0.00660033	-0.0240918
		KNW_020	2.80026e-06	3.49095	3.27421	33.7585	2.57347	2.58356	0.78598	1.75401e-05	1.0662	2.23359e-05	10.3104	0.000171313	-0.00294191	0.0446324	-0.0109258	0.0103855
		KNW_021	1.76872e-06	3.50795	3.29005	33.9217	2.58596	2.5958	0.785995	1.69635e-05	1.06623	2.28426e-05	10.3104	0.000181623
2022-02-16	One Grain Profile	KNW_001	1.51904e-05	3.81629	3.57941	36.908	2.81368	2.82354	0.786075	1.775e-05	1.06618	2.43981e-05	10.3112	0.00019573
		KNW_002	1.78716e-06	3.74602	3.51341	36.2279	2.76181	2.77154	0.786077	1.53944e-05	1.06621	2.05457e-05	10.3113	0.000159617	-0.00352287	0.0391675	-0.00634341	0.00155686
		KNW_003	-4.48868e-06	3.71536	3.48452	35.9305	2.73913	2.74867	0.786084	1.61392e-05	1.06625	2.44594e-05	10.3114	0.000176534	0.00923207	0.0410628	0.0193203	0.00970316
		KNW_004	1.18366e-05	3.73276	3.50084	36.0984	2.75193	2.7613	0.786076	1.74305e-05	1.06625	2.45045e-05	10.3114	0.000174261	0.00438072	0.0443483	0.00287326	-0.00597131
		KNW_005	6.95817e-06	3.69108	3.46178	35.6958	2.72117	2.73032	0.786062	1.69742e-05	1.06624	2.53995e-05	10.3114	0.000177208	0.0294647	0.0431893	-0.0158589	0.0163306
		KNW_006	1.25618e-05	3.72587	3.49432	36.0302	2.74654	2.75578	0.786002	1.67423e-05	1.06627	2.25205e-05	10.3111	0.000154674	-0.0274759	0.0426	0.0338787	0.0141656
		KNW_007	-1.12306e-05	3.7268	3.49533	36.0387	2.74728	2.75639	0.785984	1.56063e-05	1.06622	2.16574e-05	10.3105	0.00016529	-0.0100999	0.0397111	-0.0544409	-0.0356104
		KNW_008	-2.10132e-06	3.77314	3.53856	36.4848	2.78125	2.7903	0.785983	1.64839e-05	1.06629	2.50877e-05	10.3106	0.000171712	-0.00253764	0.0419445	0.0269757	-0.00642383
		KNW_009	5.93716e-07	3.73415	3.50194	36.1082	2.75248	2.76154	0.785985	1.85413e-05	1.06631	2.28155e-05	10.3109	0.00019482	0.0484072	0.0471822	-0.0056376	0.0486842
		KNW_010	5.03166e-06	3.76826	3.53385	36.4347	2.7773	2.7864	0.785912	1.80314e-05	1.06633	2.51758e-05	10.3102	0.000237969	-0.05899	0.0458838	0.0193416	-0.0505418
		KNW_011	6.46524e-06	3.72982	3.49785	36.0646	2.74907	2.75812	0.785931	1.72041e-05	1.06632	2.26993e-05	10.3105	0.000167559	0.00978375	0.0437807	-0.00980587	0.015469
		KNW_012	3.30604e-06	3.72829	3.4964	36.0497	2.74795	2.75691	0.785935	1.77458e-05	1.06632	2.67447e-05	10.3105	0.000178361	0.0369062	0.0451601	0.00686496	0.0333909
		KNW_013	-8.02912e-06	3.68129	3.45235	35.5931	2.71314	2.72205	0.78588	1.59295e-05	1.06631	2.49152e-05	10.3098	0.00020693	-0.0604483	0.0405368	-0.00974627	-0.0642282
		KNW_014	6.75154e-06	3.68042	3.4515	35.5864	2.71261	2.72129	0.785921	1.72972e-05	1.06632	2.54785e-05	10.3104	0.00019111	0.0421096	0.0440196	0.0138823	0.0382085
		KNW_015	1.40096e-05	3.72021	3.48888	35.9713	2.7419	2.75064	0.785896	1.65404e-05	1.0663	2.62553e-05	10.3103	0.000174898	-0.031632	0.0420917	-0.0180339	-0.00737499
		KNW_016	-1.2677e-06	3.70072	3.47053	35.7821	2.72756	2.73618	0.78592	1.674e-05	1.06633	2.5577e-05	10.3103	0.000173968	0.0170477	0.0426004	0.00443877	-0.00871149
		KNW_017	-3.74827e-06	3.69684	3.46686	35.7448	2.72466	2.73325	0.785918	1.6849e-05	1.06634	2.82762e-05	10.3104	0.000181231	0.0176889	0.0428781	0.00955112	0.0209026
		KNW_018	4.04704e-06	3.72334	3.49174	36.0005	2.74411	2.75253	0.785887	1.7409e-05	1.06633	2.38254e-05	10.3102	0.000186707	-0.048662	0.0443019	-0.0135674	-0.0286001
		KNW_019	4.59688e-06	3.66929	3.44098	35.4783	2.70439	2.71267	0.785933	1.75837e-05	1.06635	2.56924e-05	10.3105	0.000188143	0.0206408	0.0447469	-0.00155134	0.00550102
		KNW_020	9.33418e-06	3.66997	3.44155	35.4849	2.70488	2.71319	0.785947	1.73993e-05	1.06637	2.42055e-05	10.3107	0.000192221	0.0106826	0.0442764	0.0198211	0.0230795
		KNW_021	-1.08619e-05	3.65598	3.4285	35.3494	2.69461	2.70276	0.785944	2.06166e-05	1.06635	2.59829e-05	10.3105	0.000207137
2022-02-16	One Grain Profile	KNW__001	-1.96709e-06	3.62527	3.40063	35.0713	2.674	2.68233	0.786324	1.71882e-05	1.06606	2.46186e-05	10.3132	0.00017831
		KNW_002	6.25786e-06	3.62304	3.39844	35.0463	2.67205	2.68029	0.786257	1.91664e-05	1.06609	2.61786e-05	10.3125	0.000205118	-0.0448927	0.0487512	0.00620585	-0.0542043
		KNW_003	-2.61975e-06	3.60211	3.37876	34.8448	2.65659	2.66501	0.786261	1.84942e-05	1.0661	2.3738e-05	10.3129	0.00020248	-0.00353505	0.0470432	-0.0182058	0.0160013
		KNW_004	1.09392e-05	3.55953	3.33865	34.4313	2.62508	2.6335	0.78627	1.57215e-05	1.06616	2.54246e-05	10.3129	0.000157835	-0.00535101	0.0399899	0.0501904	0.00845996
		KNW_005	-7.24809e-06	3.56873	3.34744	34.5216	2.63206	2.64024	0.786288	1.7871e-05	1.06611	2.40377e-05	10.3128	0.000176135	0.00563111	0.0454568	-0.0355272	-0.0156559
		KNW_006	1.83101e-05	3.5366	3.31723	34.2108	2.60833	2.61639	0.786297	1.71406e-05	1.06613	2.40488e-05	10.313	0.000186048	-0.00353015	0.0435981	0.0178897	0.00690224
		KNW_007	1.20166e-06	3.4806	3.26475	33.6698	2.56711	2.57501	0.786312	1.62472e-05	1.06612	2.54488e-05	10.3131	0.000171611	-0.00423478	0.0413249	-0.0182129	-0.00296153
		KNW_008	3.35556e-06	3.48289	3.26682	33.6915	2.56881	2.5762	0.786333	1.67141e-05	1.06614	2.4555e-05	10.3133	0.000177363	0.0402322	0.0425131	-0.00038135	0.0153967
		KNW_009	4.60925e-07	3.4491	3.23504	33.3633	2.54369	2.55131	0.786291	1.82604e-05	1.06616	2.68747e-05	10.3131	0.00019386	-0.020226	0.0464459	0.00405838	0.00177279
		KNW_010	1.29945e-05	3.4837	3.26745	33.6968	2.56914	2.57667	0.786281	1.70433e-05	1.06618	2.17749e-05	10.3129	0.000178078	-0.0180458	0.043351	0.035259	-0.0183062
		KNW_011	1.15067e-05	3.48584	3.26964	33.7198	2.57091	2.57845	0.786299	1.57958e-05	1.06612	1.99868e-05	10.313	0.000161298	0.033618	0.0401789	-0.0465147	0.0106749
		KNW_012	8.10327e-06	3.48066	3.26465	33.6682	2.56688	2.57439	0.786265	1.68288e-05	1.06616	2.58219e-05	10.313	0.000181772	-0.0162311	0.0428063	0.0161486	0.000258259
		KNW_013	-1.37879e-05	3.43537	3.22216	33.2298	2.53344	2.54088	0.786255	1.71171e-05	1.06617	2.82014e-05	10.3129	0.000203658	-0.0160716	0.04354	0.00202172	0.00114986
		KNW_014	1.68788e-05	3.47336	3.25778	33.5968	2.5615	2.56882	0.786271	1.84568e-05	1.06617	2.35955e-05	10.3128	0.000184263	-0.01977	0.0469467	0.00536934	-0.0308736
		KNW_015	-2.22835e-05	3.40913	3.19757	32.9777	2.51431	2.52167	0.786319	1.62616e-05	1.06616	2.76407e-05	10.3133	0.000199106	0.0496181	0.0413634	-0.00047957	0.0340519
		KNW_016	-1.2488e-05	3.35558	3.14736	32.4594	2.47473	2.48198	0.786288	1.8958e-05	1.06615	2.49377e-05	10.3132	0.000191188	0.036639	0.0482234	-0.00184859	0.0300061
		KNW_017	-3.60288e-06	3.37981	3.1701	32.6915	2.49234	2.49963	0.786199	2.09448e-05	1.06615	2.50311e-05	10.3124	0.000206017	-0.113802	0.053275	-0.0253622	-0.0739625
		KNW_018	1.83215e-05	3.39164	3.18105	32.8067	2.50123	2.50841	0.78629	1.93443e-05	1.0662	2.53271e-05	10.3132	0.000190952	0.053688	0.0492067	0.0483013	0.041962
		KNW_019	6.44196e-06	3.38408	3.17413	32.7349	2.4958	2.50288	0.786296	1.77662e-05	1.06614	2.65425e-05	10.313	0.000179725	-0.0010621	0.0451895	-0.0198784	-0.00901734
		KNW_020	6.17629e-06	3.3896	3.17934	32.7889	2.49993	2.50711	0.786304	1.72014e-05	1.06613	2.34716e-05	10.3131	0.000168616	0.0335215	0.043754	-0.00714075	0.019074
		KNW_021	-6.60715e-06	3.40673	3.19539	32.9534	2.5124	2.5196	0.786259	1.71771e-05	1.06614	2.49238e-05	10.3128	0.000175753
2022-02-16	One Grain Profile	KNW_001	-6.9377e-06	3.61598	3.3922	34.9888	2.66811	2.6868	0.786543	1.85025e-05	1.06597	2.64742e-05	10.3145	0.000200384
		KNW_002	1.61854e-06	3.61192	3.3881	34.9469	2.66479	2.68309	0.786514	1.66238e-05	1.06606	2.35026e-05	10.3146	0.000164103	-0.0107775	0.0422717	0.0404504	0.017629
		KNW_003	2.5615e-07	3.5782	3.35646	34.6196	2.63986	2.65791	0.786503	1.92553e-05	1.06606	2.49922e-05	10.3143	0.000191014	0.00394088	0.0489644	0.00704138	-0.0224097
		KNW_004	-7.02485e-06	3.56782	3.34676	34.5203	2.63218	2.6502	0.786485	1.88308e-05	1.06605	2.44697e-05	10.3145	0.000179082	-0.0226775	0.0478849	-0.00277314	0.0140638
		KNW_005	-1.1788e-05	3.55016	3.3302	34.3493	2.61922	2.63707	0.786503	1.50436e-05	1.06605	2.06497e-05	10.3145	0.000157666	0.0103824	0.0382548	-0.0130361	-0.00959847
		KNW_006	1.10676e-05	3.55909	3.33851	34.4354	2.62576	2.64357	0.786505	1.65604e-05	1.06607	2.12389e-05	10.3146	0.000162024	0.0150618	0.0421119	-0.00338924	0.0101201
		KNW_007	-5.7431e-06	3.55156	3.33136	34.3613	2.62006	2.63774	0.786483	1.76636e-05	1.0661	2.49039e-05	10.3145	0.00017962	0.00547225	0.0449182	0.0222518	0.00571258
		KNW_008	-5.52215e-06	3.53937	3.31998	34.2432	2.611	2.6288	0.786453	1.54648e-05	1.06608	2.28615e-05	10.3143	0.000184618	-0.0390733	0.0393264	0.00112684	-0.0101096
		KNW_009	6.52432e-06	3.54981	3.32983	34.3449	2.61886	2.63632	0.786484	1.78191e-05	1.06606	2.39541e-05	10.3143	0.000176127	0.0809289	0.0453169	-0.0488657	0.0203025
		KNW_010	-5.23435e-06	3.51797	3.2997	34.0327	2.59484	2.61269	0.786387	1.8462e-05	1.06615	2.545e-05	10.3139	0.000180345	-0.0619602	0.0469511	0.0536624	-0.0147309
		KNW_011	3.68029e-05	3.50556	3.28815	33.9132	2.58577	2.60347	0.786388	1.80392e-05	1.06612	2.65821e-05	10.3137	0.000202584	-0.0213577	0.0458775	0.00976941	-0.0114384
		KNW_012	-2.18727e-06	3.51793	3.29992	34.0349	2.59513	2.61285	0.786423	1.51314e-05	1.06606	2.17451e-05	10.3139	0.000173394	0.00139504	0.0384815	-0.0363525	-0.016153
		KNW_013	-1.02258e-05	3.50479	3.28751	33.9085	2.58548	2.60291	0.786455	1.71903e-05	1.06609	2.34007e-05	10.3143	0.000181902	0.0499857	0.0437182	0.0209355	0.0509368
		KNW_014	2.35503e-05	3.53149	3.31262	34.1654	2.60507	2.6226	0.786409	1.48833e-05	1.06607	2.57415e-05	10.3137	0.000186743	-0.0280718	0.0378502	-0.0236079	-0.0330572
		KNW_015	-1.63187e-05	3.52409	3.30557	34.0931	2.59953	2.61716	0.786407	2.00767e-05	1.0661	2.22181e-05	10.3138	0.0001873	0.00949513	0.0510597	0.00787386	0.0092563
		KNW_016	-3.72773e-06	3.52944	3.31055	34.144	2.60338	2.6209	0.78639	1.52701e-05	1.06612	2.36106e-05	10.3137	0.000171464	-0.0197646	0.0388351	5.47161e-05	-0.00978693
		KNW_017	1.96095e-06	3.54237	3.32263	34.2689	2.61293	2.63037	0.786405	1.74081e-05	1.06614	2.10022e-05	10.3138	0.000170847	0.00222452	0.0442728	0.0144631	0.00159615
		KNW_018	-2.42158e-06	3.51856	3.30033	34.0392	2.59543	2.61289	0.786415	1.84327e-05	1.06612	2.48704e-05	10.3139	0.000175408	0.0491112	0.04688	-0.0106658	0.0177229
		KNW_019	2.86052e-06	3.5271	3.30833	34.1206	2.6015	2.61894	0.786349	1.81533e-05	1.06613	2.54494e-05	10.3136	0.000170552	-0.0437947	0.0461692	0.011649	-0.0100056
		KNW_020	-3.40363e-05	3.57274	3.35119	34.5624	2.63521	2.65263	0.786351	1.67925e-05	1.06611	2.15966e-05	10.3135	0.000168029	-0.018602	0.0427091	-0.0230719	-0.0179048
		KNW_021	-5.89411e-07	3.58465	3.36227	34.6776	2.64403	2.66132	0.786382	1.71798e-05	1.06614	2.48194e-05	10.3137	0.000185949

## Sheet: PlotDat5
Source sheet	RAP	-0.2	4.05502e-05	-0.12	0	-0.2	0
Plot name	ProbDens4	-0.1998	4.20516e-05	-0.1	0	0.1998	0
Plot Type	16	-0.1996	4.36057e-05	-0.1	2
1st free col	9	-0.1994	4.52143e-05	-0.12	2
Sigma Level	2	-0.1992	4.6892e-05	-0.12	0
Absolute Errs	TRUE	-0.199	4.86157e-05	ErrBox	ErrBox
Symbol Type	1	-0.1988	5.03996e-05	-0.1	0
Inverse Plot	FALSE	-0.1986	5.22455e-05	-0.08	0
Color Plot	TRUE	-0.1984	5.41557e-05	-0.08	1
3D plot	FALSE	-0.1982	5.6132e-05	-0.1	1
Linear	FALSE	-0.198	5.81768e-05	-0.1	0
Data Range	R4:S93	-0.1978	6.02922e-05	ErrBox	ErrBox
Filled Symbols	FALSE	-0.1976	6.24805e-05	-0.08	0
ConcAge	FALSE	-0.1974	6.47442e-05	-0.06	0
ConcSwap	FALSE	-0.1972	6.70856e-05	-0.06	5
1st Symbol-row	1	-0.197	6.95072e-05	-0.08	5
		-0.1968	7.20117e-05	-0.08	0
		-0.1966	7.46017e-05	ErrBox	ErrBox
		-0.1964	7.72799e-05	-0.06	0
		-0.1962	8.00492e-05	-0.04	0
		-0.196	8.29125e-05	-0.04	13
		-0.1958	8.58727e-05	-0.06	13
		-0.1956	8.89331e-05	-0.06	0
		-0.1954	9.20966e-05	ErrBox	ErrBox
		-0.1952	9.53667e-05	-0.04	0
		-0.195	9.87467e-05	-0.02	0
		-0.1948	0.00010224	-0.02	7
		-0.1946	0.00010585	-0.04	7
		-0.1944	0.000109581	-0.04	0
		-0.1942	0.000113436	ErrBox	ErrBox
		-0.194	0.00011742	-0.02	0
		-0.1938	0.000121536	-1.73472e-17	0
		-0.1936	0.000125788	-1.73472e-17	10
		-0.1934	0.000130181	-0.02	10
		-0.1932	0.000134718	-0.02	0
		-0.193	0.000139406	ErrBox	ErrBox
		-0.1928	0.000144247	0	0
		-0.1926	0.000149247	0.02	0
		-0.1924	0.000154411	0.02	14
		-0.1922	0.000159743	0	14
		-0.192	0.00016525	0	0
		-0.1918	0.000170936	ErrBox	ErrBox
		-0.1916	0.000176806	0.02	0
		-0.1914	0.000182866	0.04	0
		-0.1912	0.000189123	0.04	16
		-0.191	0.000195581	0.02	16
		-0.1908	0.000202248	0.02	0
		-0.1906	0.000209129	ErrBox	ErrBox
		-0.1904	0.00021623	0.04	0
		-0.1902	0.000223559	0.06	0
		-0.19	0.000231122	0.06	3
		-0.1898	0.000238927	0.04	3
		-0.1896	0.000246979	0.04	0
		-0.1894	0.000255287	ErrBox	ErrBox
		-0.1892	0.000263859	0.06	0
		-0.189	0.000272702	0.08	0
		-0.1888	0.000281823	0.08	5
		-0.1886	0.000291232	0.06	5
		-0.1884	0.000300937	0.06	0
		-0.1882	0.000310959	ErrBox	ErrBox
		-0.188	0.000321281	0.08	0
		-0.1878	0.000331927	0.1	0
		-0.1876	0.000342904	0.1	3
		-0.1874	0.000354222	0.08	3
		-0.1872	0.000365892	0.08	0
		-0.187	0.000377923	ErrBox	ErrBox
		-0.1868	0.000390326	0.1	0
		-0.1866	0.000403112	0.12	0
		-0.1864	0.000416291	0.12	1
		-0.1862	0.000429875	0.1	1
		-0.186	0.000443875	0.1	0
		-0.1858	0.000458303	ErrBox	ErrBox
		-0.1856	0.000473172	0.12	0
		-0.1854	0.000488494	0.14	0
		-0.1852	0.000504293	0.14	1
		-0.185	0.00052056	0.12	1
		-0.1848	0.000537344	0.12	0
		-0.1846	0.00055461	ErrBox	ErrBox
		-0.1844	0.000572397
		-0.1842	0.000590718
		-0.184	0.000609589
		-0.1838	0.000629025
		-0.1836	0.000649041
		-0.1834	0.000669654
		-0.1832	0.000690881
		-0.183	0.000712737
		-0.1828	0.000735241
		-0.1826	0.000758409
		-0.1824	0.000782261
		-0.1822	0.000806815
		-0.182	0.000832101
		-0.1818	0.000858117
		-0.1816	0.000884893
		-0.1814	0.000912462
		-0.1812	0.000940821
		-0.181	0.000970004
		-0.1808	0.00100003
		-0.1806	0.00103093
		-0.1804	0.00106272
		-0.1802	0.00109542
		-0.18	0.00112906
		-0.1798	0.00116366
		-0.1796	0.00119926
		-0.1794	0.00123587
		-0.1792	0.00127352
		-0.179	0.00131224
		-0.1788	0.00135205
		-0.1786	0.001393
		-0.1784	0.00143509
		-0.1782	0.00147837
		-0.178	0.00152287
		-0.1778	0.00156861
		-0.1776	0.00161563
		-0.1774	0.00166396
		-0.1772	0.00171363
		-0.177	0.00176468
		-0.1768	0.00181716
		-0.1766	0.00187108
		-0.1764	0.00192649
		-0.1762	0.00198341
		-0.176	0.00204189
		-0.1758	0.00210198
		-0.1756	0.0021637
		-0.1754	0.00222711
		-0.1752	0.00229225
		-0.175	0.00235914
		-0.1748	0.00242784
		-0.1746	0.00249839
		-0.1744	0.00257084
		-0.1742	0.00264523
		-0.174	0.00272161
		-0.1738	0.00280004
		-0.1736	0.00288055
		-0.1734	0.0029632
		-0.1732	0.00304804
		-0.173	0.00313512
		-0.1728	0.0032245
		-0.1726	0.00331623
		-0.1724	0.00341037
		-0.1722	0.00350697
		-0.172	0.00360609
		-0.1718	0.0037078
		-0.1716	0.00381214
		-0.1714	0.00391919
		-0.1712	0.00402901
		-0.171	0.00414165
		-0.1708	0.00425719
		-0.1706	0.0043757
		-0.1704	0.00449723
		-0.1702	0.00462186
		-0.17	0.00474967
		-0.1698	0.00488071
		-0.1696	0.00501509
		-0.1694	0.00515285
		-0.1692	0.00529407
		-0.169	0.00543883
		-0.1688	0.00558723
		-0.1686	0.00573932
		-0.1684	0.00589521
		-0.1682	0.00605496
		-0.168	0.00621867
		-0.1678	0.00638642
		-0.1676	0.00655831
		-0.1674	0.00673443
		-0.1672	0.00691484
		-0.167	0.00709968
		-0.1668	0.00728901
		-0.1666	0.00748293
		-0.1664	0.00768156
		-0.1662	0.00788499
		-0.166	0.0080933
		-0.1658	0.00830663
		-0.1656	0.00852506
		-0.1654	0.00874869
		-0.1652	0.00897766
		-0.165	0.00921205
		-0.1648	0.00945199
		-0.1646	0.00969759
		-0.1644	0.00994897
		-0.1642	0.0102062
		-0.164	0.0104695
		-0.1638	0.010739
		-0.1636	0.0110146
		-0.1634	0.0112967
		-0.1632	0.0115853
		-0.163	0.0118805
		-0.1628	0.0121826
		-0.1626	0.0124915
		-0.1624	0.0128075
		-0.1622	0.0131306
		-0.162	0.0134611
		-0.1618	0.0137991
		-0.1616	0.0141446
		-0.1614	0.0144979
		-0.1612	0.0148592
		-0.161	0.0152285
		-0.1608	0.015606
		-0.1606	0.0159919
		-0.1604	0.0163863
		-0.1602	0.0167893
		-0.16	0.0172013
		-0.1598	0.0176222
		-0.1596	0.0180523
		-0.1594	0.0184918
		-0.1592	0.0189408
		-0.159	0.0193994
		-0.1588	0.019868
		-0.1586	0.0203465
		-0.1584	0.0208353
		-0.1582	0.0213345
		-0.158	0.0218443
		-0.1578	0.0223649
		-0.1576	0.0228964
		-0.1574	0.0234391
		-0.1572	0.0239932
		-0.157	0.0245587
		-0.1568	0.025136
		-0.1566	0.0257253
		-0.1564	0.0263267
		-0.1562	0.0269404
		-0.156	0.0275667
		-0.1558	0.0282058
		-0.1556	0.0288579
		-0.1554	0.0295231
		-0.1552	0.0302017
		-0.155	0.030894
		-0.1548	0.0316001
		-0.1546	0.0323203
		-0.1544	0.0330547
		-0.1542	0.0338037
		-0.154	0.0345674
		-0.1538	0.0353461
		-0.1536	0.03614
		-0.1534	0.0369494
		-0.1532	0.0377744
		-0.153	0.0386154
		-0.1528	0.0394725
		-0.1526	0.0403461
		-0.1524	0.0412363
		-0.1522	0.0421433
		-0.152	0.0430676
		-0.1518	0.0440092
		-0.1516	0.0449685
		-0.1514	0.0459457
		-0.1512	0.0469411
		-0.151	0.0479549
		-0.1508	0.0489873
		-0.1506	0.0500388
		-0.1504	0.0511094
		-0.1502	0.0521995
		-0.15	0.0533093
		-0.1498	0.0544392
		-0.1496	0.0555893
		-0.1494	0.0567599
		-0.1492	0.0579514
		-0.149	0.059164
		-0.1488	0.060398
		-0.1486	0.0616536
		-0.1484	0.0629311
		-0.1482	0.0642308
		-0.148	0.065553
		-0.1478	0.0668979
		-0.1476	0.0682659
		-0.1474	0.0696573
		-0.1472	0.0710722
		-0.147	0.072511
		-0.1468	0.073974
		-0.1466	0.0754614
		-0.1464	0.0769736
		-0.1462	0.0785109
		-0.146	0.0800734
		-0.1458	0.0816616
		-0.1456	0.0832756
		-0.1454	0.0849158
		-0.1452	0.0865825
		-0.145	0.088276
		-0.1448	0.0899964
		-0.1446	0.0917442
		-0.1444	0.0935197
		-0.1442	0.095323
		-0.144	0.0971545
		-0.1438	0.0990145
		-0.1436	0.100903
		-0.1434	0.102821
		-0.1432	0.104768
		-0.143	0.106745
		-0.1428	0.108752
		-0.1426	0.110788
		-0.1424	0.112856
		-0.1422	0.114954
		-0.142	0.117083
		-0.1418	0.119243
		-0.1416	0.121435
		-0.1414	0.123659
		-0.1412	0.125914
		-0.141	0.128203
		-0.1408	0.130523
		-0.1406	0.132877
		-0.1404	0.135264
		-0.1402	0.137685
		-0.14	0.140139
		-0.1398	0.142627
		-0.1396	0.145149
		-0.1394	0.147706
		-0.1392	0.150297
		-0.139	0.152924
		-0.1388	0.155585
		-0.1386	0.158283
		-0.1384	0.161015
		-0.1382	0.163784
		-0.138	0.166589
		-0.1378	0.16943
		-0.1376	0.172308
		-0.1374	0.175223
		-0.1372	0.178175
		-0.137	0.181164
		-0.1368	0.184191
		-0.1366	0.187255
		-0.1364	0.190357
		-0.1362	0.193497
		-0.136	0.196676
		-0.1358	0.199893
		-0.1356	0.203149
		-0.1354	0.206443
		-0.1352	0.209777
		-0.135	0.21315
		-0.1348	0.216562
		-0.1346	0.220014
		-0.1344	0.223505
		-0.1342	0.227036
		-0.134	0.230608
		-0.1338	0.234219
		-0.1336	0.237871
		-0.1334	0.241563
		-0.1332	0.245295
		-0.133	0.249069
		-0.1328	0.252883
		-0.1326	0.256738
		-0.1324	0.260634
		-0.1322	0.264571
		-0.132	0.26855
		-0.1318	0.272569
		-0.1316	0.276631
		-0.1314	0.280733
		-0.1312	0.284877
		-0.131	0.289063
		-0.1308	0.29329
		-0.1306	0.297559
		-0.1304	0.30187
		-0.1302	0.306223
		-0.13	0.310618
		-0.1298	0.315054
		-0.1296	0.319533
		-0.1294	0.324053
		-0.1292	0.328615
		-0.129	0.333219
		-0.1288	0.337866
		-0.1286	0.342554
		-0.1284	0.347284
		-0.1282	0.352056
		-0.128	0.35687
		-0.1278	0.361726
		-0.1276	0.366624
		-0.1274	0.371564
		-0.1272	0.376545
		-0.127	0.381568
		-0.1268	0.386633
		-0.1266	0.391739
		-0.1264	0.396887
		-0.1262	0.402077
		-0.126	0.407308
		-0.1258	0.41258
		-0.1256	0.417894
		-0.1254	0.423248
		-0.1252	0.428644
		-0.125	0.434081
		-0.1248	0.439558
		-0.1246	0.445076
		-0.1244	0.450635
		-0.1242	0.456234
		-0.124	0.461874
		-0.1238	0.467554
		-0.1236	0.473274
		-0.1234	0.479034
		-0.1232	0.484834
		-0.123	0.490673
		-0.1228	0.496552
		-0.1226	0.502471
		-0.1224	0.508428
		-0.1222	0.514425
		-0.122	0.520461
		-0.1218	0.526535
		-0.1216	0.532648
		-0.1214	0.538799
		-0.1212	0.544988
		-0.121	0.551216
		-0.1208	0.557481
		-0.1206	0.563784
		-0.1204	0.570125
		-0.1202	0.576502
		-0.12	0.582917
		-0.1198	0.589369
		-0.1196	0.595858
		-0.1194	0.602383
		-0.1192	0.608945
		-0.119	0.615543
		-0.1188	0.622176
		-0.1186	0.628846
		-0.1184	0.635551
		-0.1182	0.642292
		-0.118	0.649068
		-0.1178	0.655879
		-0.1176	0.662725
		-0.1174	0.669606
		-0.1172	0.676521
		-0.117	0.683471
		-0.1168	0.690455
		-0.1166	0.697472
		-0.1164	0.704524
		-0.1162	0.711609
		-0.116	0.718728
		-0.1158	0.725881
		-0.1156	0.733066
		-0.1154	0.740285
		-0.1152	0.747536
		-0.115	0.75482
		-0.1148	0.762137
		-0.1146	0.769486
		-0.1144	0.776868
		-0.1142	0.784282
		-0.114	0.791728
		-0.1138	0.799206
		-0.1136	0.806716
		-0.1134	0.814258
		-0.1132	0.821831
		-0.113	0.829436
		-0.1128	0.837073
		-0.1126	0.844741
		-0.1124	0.852441
		-0.1122	0.860172
		-0.112	0.867934
		-0.1118	0.875728
		-0.1116	0.883553
		-0.1114	0.891409
		-0.1112	0.899297
		-0.111	0.907215
		-0.1108	0.915165
		-0.1106	0.923147
		-0.1104	0.931159
		-0.1102	0.939203
		-0.11	0.947279
		-0.1098	0.955385
		-0.1096	0.963524
		-0.1094	0.971693
		-0.1092	0.979895
		-0.109	0.988128
		-0.1088	0.996394
		-0.1086	1.00469
		-0.1084	1.01302
		-0.1082	1.02138
		-0.108	1.02978
		-0.1078	1.0382
		-0.1076	1.04666
		-0.1074	1.05516
		-0.1072	1.06368
		-0.107	1.07224
		-0.1068	1.08083
		-0.1066	1.08946
		-0.1064	1.09812
		-0.1062	1.10682
		-0.106	1.11555
		-0.1058	1.12431
		-0.1056	1.13311
		-0.1054	1.14195
		-0.1052	1.15082
		-0.105	1.15973
		-0.1048	1.16868
		-0.1046	1.17766
		-0.1044	1.18668
		-0.1042	1.19573
		-0.104	1.20483
		-0.1038	1.21396
		-0.1036	1.22314
		-0.1034	1.23235
		-0.1032	1.2416
		-0.103	1.2509
		-0.1028	1.26023
		-0.1026	1.2696
		-0.1024	1.27902
		-0.1022	1.28848
		-0.102	1.29798
		-0.1018	1.30753
		-0.1016	1.31712
		-0.1014	1.32675
		-0.1012	1.33643
		-0.101	1.34616
		-0.1008	1.35593
		-0.1006	1.36574
		-0.1004	1.37561
		-0.1002	1.38552
		-0.1	1.39548
		-0.0998	1.4055
		-0.0996	1.41556
		-0.0994	1.42567
		-0.0992	1.43583
		-0.099	1.44604
		-0.0988	1.45631
		-0.0986	1.46663
		-0.0984	1.477
		-0.0982	1.48743
		-0.098	1.49791
		-0.0978	1.50845
		-0.0976	1.51905
		-0.0974	1.5297
		-0.0972	1.54041
		-0.097	1.55118
		-0.0968	1.56201
		-0.0966	1.5729
		-0.0964	1.58385
		-0.0962	1.59486
		-0.096	1.60593
		-0.0958	1.61707
		-0.0956	1.62827
		-0.0954	1.63953
		-0.0952	1.65086
		-0.095	1.66225
		-0.0948	1.67371
		-0.0946	1.68524
		-0.0944	1.69684
		-0.0942	1.7085
		-0.094	1.72023
		-0.0938	1.73204
		-0.0936	1.74391
		-0.0934	1.75585
		-0.0932	1.76787
		-0.093	1.77996
		-0.0928	1.79212
		-0.0926	1.80436
		-0.0924	1.81667
		-0.0922	1.82905
		-0.092	1.84152
		-0.0918	1.85405
		-0.0916	1.86667
		-0.0914	1.87936
		-0.0912	1.89213
		-0.091	1.90498
		-0.0908	1.9179
		-0.0906	1.93091
		-0.0904	1.944
		-0.0902	1.95717
		-0.09	1.97041
		-0.0898	1.98374
		-0.0896	1.99716
		-0.0894	2.01065
		-0.0892	2.02423
		-0.089	2.03789
		-0.0888	2.05163
		-0.0886	2.06546
		-0.0884	2.07937
		-0.0882	2.09337
		-0.088	2.10745
		-0.0878	2.12162
		-0.0876	2.13587
		-0.0874	2.15021
		-0.0872	2.16463
		-0.087	2.17914
		-0.0868	2.19373
		-0.0866	2.20842
		-0.0864	2.22318
		-0.0862	2.23804
		-0.086	2.25298
		-0.0858	2.268
		-0.0856	2.28312
		-0.0854	2.29832
		-0.0852	2.3136
		-0.085	2.32897
		-0.0848	2.34443
		-0.0846	2.35998
		-0.0844	2.3756
		-0.0842	2.39132
		-0.084	2.40712
		-0.0838	2.423
		-0.0836	2.43897
		-0.0834	2.45503
		-0.0832	2.47116
		-0.083	2.48739
		-0.0828	2.50369
		-0.0826	2.52008
		-0.0824	2.53654
		-0.0822	2.5531
		-0.082	2.56973
		-0.0818	2.58644
		-0.0816	2.60323
		-0.0814	2.6201
		-0.0812	2.63705
		-0.081	2.65407
		-0.0808	2.67118
		-0.0806	2.68836
		-0.0804	2.70561
		-0.0802	2.72294
		-0.08	2.74034
		-0.0798	2.75782
		-0.0796	2.77536
		-0.0794	2.79298
		-0.0792	2.81067
		-0.079	2.82842
		-0.0788	2.84624
		-0.0786	2.86413
		-0.0784	2.88209
		-0.0782	2.9001
		-0.078	2.91818
		-0.0778	2.93632
		-0.0776	2.95452
		-0.0774	2.97278
		-0.0772	2.9911
		-0.077	3.00947
		-0.0768	3.0279
		-0.0766	3.04638
		-0.0764	3.06491
		-0.0762	3.08349
		-0.076	3.10212
		-0.0758	3.1208
		-0.0756	3.13952
		-0.0754	3.15828
		-0.0752	3.17709
		-0.075	3.19594
		-0.0748	3.21482
		-0.0746	3.23375
		-0.0744	3.2527
		-0.0742	3.27169
		-0.074	3.29072
		-0.0738	3.30977
		-0.0736	3.32885
		-0.0734	3.34795
		-0.0732	3.36708
		-0.073	3.38623
		-0.0728	3.4054
		-0.0726	3.42459
		-0.0724	3.44379
		-0.0722	3.46301
		-0.072	3.48224
		-0.0718	3.50148
		-0.0716	3.52073
		-0.0714	3.53998
		-0.0712	3.55924
		-0.071	3.5785
		-0.0708	3.59775
		-0.0706	3.61701
		-0.0704	3.63626
		-0.0702	3.6555
		-0.07	3.67473
		-0.0698	3.69395
		-0.0696	3.71316
		-0.0694	3.73235
		-0.0692	3.75152
		-0.069	3.77068
		-0.0688	3.78981
		-0.0686	3.80891
		-0.0684	3.82799
		-0.0682	3.84704
		-0.068	3.86606
		-0.0678	3.88504
		-0.0676	3.90399
		-0.0674	3.92289
		-0.0672	3.94176
		-0.067	3.96059
		-0.0668	3.97937
		-0.0666	3.9981
		-0.0664	4.01678
		-0.0662	4.03542
		-0.066	4.05399
		-0.0658	4.07252
		-0.0656	4.09098
		-0.0654	4.10938
		-0.0652	4.12772
		-0.065	4.146
		-0.0648	4.16421
		-0.0646	4.18235
		-0.0644	4.20042
		-0.0642	4.21841
		-0.064	4.23633
		-0.0638	4.25418
		-0.0636	4.27194
		-0.0634	4.28962
		-0.0632	4.30722
		-0.063	4.32473
		-0.0628	4.34216
		-0.0626	4.3595
		-0.0624	4.37674
		-0.0622	4.3939
		-0.062	4.41095
		-0.0618	4.42792
		-0.0616	4.44478
		-0.0614	4.46154
		-0.0612	4.4782
		-0.061	4.49476
		-0.0608	4.51121
		-0.0606	4.52755
		-0.0604	4.54379
		-0.0602	4.55991
		-0.06	4.57593
		-0.0598	4.59183
		-0.0596	4.60761
		-0.0594	4.62328
		-0.0592	4.63883
		-0.059	4.65426
		-0.0588	4.66957
		-0.0586	4.68476
		-0.0584	4.69983
		-0.0582	4.71477
		-0.058	4.72959
		-0.0578	4.74428
		-0.0576	4.75884
		-0.0574	4.77328
		-0.0572	4.78758
		-0.057	4.80175
		-0.0568	4.8158
		-0.0566	4.82971
		-0.0564	4.84348
		-0.0562	4.85712
		-0.056	4.87063
		-0.0558	4.884
		-0.0556	4.89724
		-0.0554	4.91034
		-0.0552	4.9233
		-0.055	4.93612
		-0.0548	4.9488
		-0.0546	4.96135
		-0.0544	4.97375
		-0.0542	4.98602
		-0.054	4.99814
		-0.0538	5.01013
		-0.0536	5.02197
		-0.0534	5.03368
		-0.0532	5.04524
		-0.053	5.05666
		-0.0528	5.06795
		-0.0526	5.07909
		-0.0524	5.09009
		-0.0522	5.10094
		-0.052	5.11166
		-0.0518	5.12224
		-0.0516	5.13268
		-0.0514	5.14298
		-0.0512	5.15314
		-0.051	5.16315
		-0.0508	5.17304
		-0.0506	5.18278
		-0.0504	5.19238
		-0.0502	5.20185
		-0.05	5.21118
		-0.0498	5.22038
		-0.0496	5.22944
		-0.0494	5.23837
		-0.0492	5.24716
		-0.049	5.25582
		-0.0488	5.26435
		-0.0486	5.27275
		-0.0484	5.28101
		-0.0482	5.28915
		-0.048	5.29717
		-0.0478	5.30505
		-0.0476	5.31281
		-0.0474	5.32044
		-0.0472	5.32795
		-0.047	5.33534
		-0.0468	5.34261
		-0.0466	5.34976
		-0.0464	5.35679
		-0.0462	5.3637
		-0.046	5.3705
		-0.0458	5.37719
		-0.0456	5.38376
		-0.0454	5.39022
		-0.0452	5.39658
		-0.045	5.40282
		-0.0448	5.40896
		-0.0446	5.415
		-0.0444	5.42093
		-0.0442	5.42676
		-0.044	5.43249
		-0.0438	5.43813
		-0.0436	5.44367
		-0.0434	5.44911
		-0.0432	5.45447
		-0.043	5.45973
		-0.0428	5.46491
		-0.0426	5.47
		-0.0424	5.475
		-0.0422	5.47993
		-0.042	5.48477
		-0.0418	5.48953
		-0.0416	5.49422
		-0.0414	5.49884
		-0.0412	5.50338
		-0.041	5.50785
		-0.0408	5.51226
		-0.0406	5.5166
		-0.0404	5.52087
		-0.0402	5.52509
		-0.04	5.52924
		-0.0398	5.53334
		-0.0396	5.53738
		-0.0394	5.54137
		-0.0392	5.54531
		-0.039	5.5492
		-0.0388	5.55304
		-0.0386	5.55684
		-0.0384	5.5606
		-0.0382	5.56432
		-0.038	5.56801
		-0.0378	5.57165
		-0.0376	5.57527
		-0.0374	5.57885
		-0.0372	5.58241
		-0.037	5.58594
		-0.0368	5.58945
		-0.0366	5.59293
		-0.0364	5.5964
		-0.0362	5.59985
		-0.036	5.60328
		-0.0358	5.60671
		-0.0356	5.61012
		-0.0354	5.61352
		-0.0352	5.61692
		-0.035	5.62031
		-0.0348	5.62371
		-0.0346	5.6271
		-0.0344	5.6305
		-0.0342	5.6339
		-0.034	5.63731
		-0.0338	5.64073
		-0.0336	5.64416
		-0.0334	5.6476
		-0.0332	5.65106
		-0.033	5.65454
		-0.0328	5.65804
		-0.0326	5.66156
		-0.0324	5.6651
		-0.0322	5.66867
		-0.032	5.67227
		-0.0318	5.6759
		-0.0316	5.67956
		-0.0314	5.68326
		-0.0312	5.68699
		-0.031	5.69075
		-0.0308	5.69456
		-0.0306	5.69841
		-0.0304	5.7023
		-0.0302	5.70624
		-0.03	5.71022
		-0.0298	5.71426
		-0.0296	5.71834
		-0.0294	5.72247
		-0.0292	5.72666
		-0.029	5.73091
		-0.0288	5.73521
		-0.0286	5.73957
		-0.0284	5.74398
		-0.0282	5.74846
		-0.028	5.75301
		-0.0278	5.75762
		-0.0276	5.76229
		-0.0274	5.76703
		-0.0272	5.77184
		-0.027	5.77672
		-0.0268	5.78167
		-0.0266	5.78669
		-0.0264	5.79179
		-0.0262	5.79696
		-0.026	5.80221
		-0.0258	5.80753
		-0.0256	5.81294
		-0.0254	5.81842
		-0.0252	5.82398
		-0.025	5.82962
		-0.0248	5.83535
		-0.0246	5.84116
		-0.0244	5.84705
		-0.0242	5.85303
		-0.024	5.85909
		-0.0238	5.86524
		-0.0236	5.87147
		-0.0234	5.8778
		-0.0232	5.88421
		-0.023	5.89071
		-0.0228	5.8973
		-0.0226	5.90397
		-0.0224	5.91074
		-0.0222	5.9176
		-0.022	5.92455
		-0.0218	5.93159
		-0.0216	5.93872
		-0.0214	5.94595
		-0.0212	5.95326
		-0.021	5.96067
		-0.0208	5.96817
		-0.0206	5.97577
		-0.0204	5.98345
		-0.0202	5.99123
		-0.02	5.9991
		-0.0198	6.00706
		-0.0196	6.01512
		-0.0194	6.02326
		-0.0192	6.0315
		-0.019	6.03983
		-0.0188	6.04825
		-0.0186	6.05676
		-0.0184	6.06536
		-0.0182	6.07406
		-0.018	6.08284
		-0.0178	6.09171
		-0.0176	6.10067
		-0.0174	6.10971
		-0.0172	6.11885
		-0.017	6.12807
		-0.0168	6.13737
		-0.0166	6.14677
		-0.0164	6.15624
		-0.0162	6.1658
		-0.016	6.17544
		-0.0158	6.18517
		-0.0156	6.19497
		-0.0154	6.20485
		-0.0152	6.21482
		-0.015	6.22486
		-0.0148	6.23497
		-0.0146	6.24516
		-0.0144	6.25543
		-0.0142	6.26577
		-0.014	6.27618
		-0.0138	6.28666
		-0.0136	6.29721
		-0.0134	6.30783
		-0.0132	6.31851
		-0.013	6.32926
		-0.0128	6.34007
		-0.0126	6.35095
		-0.0124	6.36188
		-0.0122	6.37287
		-0.012	6.38392
		-0.0118	6.39502
		-0.0116	6.40618
		-0.0114	6.41739
		-0.0112	6.42865
		-0.011	6.43996
		-0.0108	6.45131
		-0.0106	6.46271
		-0.0104	6.47416
		-0.0102	6.48564
		-0.01	6.49716
		-0.0098	6.50872
		-0.0096	6.52031
		-0.0094	6.53194
		-0.0092	6.5436
		-0.009	6.55528
		-0.0088	6.567
		-0.0086	6.57873
		-0.0084	6.59049
		-0.0082	6.60227
		-0.008	6.61407
		-0.0078	6.62589
		-0.0076	6.63771
		-0.0074	6.64955
		-0.0072	6.6614
		-0.007	6.67326
		-0.0068	6.68512
		-0.0066	6.69698
		-0.0064	6.70884
		-0.0062	6.7207
		-0.006	6.73255
		-0.0058	6.74439
		-0.0056	6.75623
		-0.0054	6.76805
		-0.0052	6.77986
		-0.005	6.79165
		-0.0048	6.80342
		-0.0046	6.81517
		-0.0044	6.8269
		-0.0042	6.83859
		-0.004	6.85026
		-0.0038	6.86189
		-0.0036	6.87349
		-0.0034	6.88506
		-0.0032	6.89658
		-0.003	6.90806
		-0.0028	6.91949
		-0.0026	6.93088
		-0.0024	6.94222
		-0.0022	6.9535
		-0.002	6.96473
		-0.0018	6.9759
		-0.0016	6.98701
		-0.0014	6.99806
		-0.0012	7.00904
		-0.001	7.01995
		-0.0008	7.03079
		-0.0006	7.04156
		-0.0004	7.05226
		-0.0002	7.06287
		-1.51788e-18	7.0734
		0.0002	7.08385
		0.0004	7.09422
		0.0006	7.10449
		0.0008	7.11468
		0.001	7.12477
		0.0012	7.13476
		0.0014	7.14465
		0.0016	7.15445
		0.0018	7.16414
		0.002	7.17372
		0.0022	7.1832
		0.0024	7.19256
		0.0026	7.20182
		0.0028	7.21095
		0.003	7.21997
		0.0032	7.22887
		0.0034	7.23764
		0.0036	7.24629
		0.0038	7.25481
		0.004	7.26321
		0.0042	7.27147
		0.0044	7.27959
		0.0046	7.28759
		0.0048	7.29544
		0.005	7.30315
		0.0052	7.31072
		0.0054	7.31814
		0.0056	7.32542
		0.0058	7.33254
		0.006	7.33952
		0.0062	7.34634
		0.0064	7.35301
		0.0066	7.35952
		0.0068	7.36587
		0.007	7.37206
		0.0072	7.37809
		0.0074	7.38395
		0.0076	7.38965
		0.0078	7.39518
		0.008	7.40053
		0.0082	7.40572
		0.0084	7.41073
		0.0086	7.41557
		0.0088	7.42023
		0.009	7.42472
		0.0092	7.42902
		0.0094	7.43314
		0.0096	7.43708
		0.0098	7.44083
		0.01	7.4444
		0.0102	7.44778
		0.0104	7.45098
		0.0106	7.45398
		0.0108	7.45679
		0.011	7.45941
		0.0112	7.46184
		0.0114	7.46407
		0.0116	7.4661
		0.0118	7.46794
		0.012	7.46958
		0.0122	7.47102
		0.0124	7.47226
		0.0126	7.4733
		0.0128	7.47414
		0.013	7.47478
		0.0132	7.47521
		0.0134	7.47544
		0.0136	7.47546
		0.0138	7.47528
		0.014	7.47489
		0.0142	7.47429
		0.0144	7.47349
		0.0146	7.47248
		0.0148	7.47125
		0.015	7.46982
		0.0152	7.46818
		0.0154	7.46633
		0.0156	7.46427
		0.0158	7.462
		0.016	7.45952
		0.0162	7.45682
		0.0164	7.45392
		0.0166	7.4508
		0.0168	7.44747
		0.017	7.44393
		0.0172	7.44017
		0.0174	7.43621
		0.0176	7.43203
		0.0178	7.42764
		0.018	7.42304
		0.0182	7.41822
		0.0184	7.4132
		0.0186	7.40796
		0.0188	7.40251
		0.019	7.39685
		0.0192	7.39099
		0.0194	7.38491
		0.0196	7.37862
		0.0198	7.37212
		0.02	7.36541
		0.0202	7.35849
		0.0204	7.35137
		0.0206	7.34404
		0.0208	7.3365
		0.021	7.32875
		0.0212	7.3208
		0.0214	7.31265
		0.0216	7.30429
		0.0218	7.29573
		0.022	7.28696
		0.0222	7.278
		0.0224	7.26883
		0.0226	7.25946
		0.0228	7.2499
		0.023	7.24013
		0.0232	7.23017
		0.0234	7.22002
		0.0236	7.20966
		0.0238	7.19912
		0.024	7.18838
		0.0242	7.17745
		0.0244	7.16633
		0.0246	7.15502
		0.0248	7.14353
		0.025	7.13184
		0.0252	7.11998
		0.0254	7.10792
		0.0256	7.09569
		0.0258	7.08327
		0.026	7.07067
		0.0262	7.0579
		0.0264	7.04495
		0.0266	7.03182
		0.0268	7.01852
		0.027	7.00505
		0.0272	6.9914
		0.0274	6.97759
		0.0276	6.9636
		0.0278	6.94946
		0.028	6.93514
		0.0282	6.92067
		0.0284	6.90603
		0.0286	6.89123
		0.0288	6.87628
		0.029	6.86117
		0.0292	6.8459
		0.0294	6.83049
		0.0296	6.81492
		0.0298	6.7992
		0.03	6.78334
		0.0302	6.76733
		0.0304	6.75118
		0.0306	6.73489
		0.0308	6.71845
		0.031	6.70188
		0.0312	6.68518
		0.0314	6.66834
		0.0316	6.65136
		0.0318	6.63426
		0.032	6.61703
		0.0322	6.59968
		0.0324	6.5822
		0.0326	6.5646
		0.0328	6.54688
		0.033	6.52904
		0.0332	6.51108
		0.0334	6.49302
		0.0336	6.47484
		0.0338	6.45655
		0.034	6.43815
		0.0342	6.41965
		0.0344	6.40105
		0.0346	6.38234
		0.0348	6.36354
		0.035	6.34463
		0.0352	6.32564
		0.0354	6.30655
		0.0356	6.28737
		0.0358	6.2681
		0.036	6.24875
		0.0362	6.22931
		0.0364	6.20979
		0.0366	6.19019
		0.0368	6.17051
		0.037	6.15076
		0.0372	6.13093
		0.0374	6.11104
		0.0376	6.09107
		0.0378	6.07103
		0.038	6.05094
		0.0382	6.03077
		0.0384	6.01055
		0.0386	5.99027
		0.0388	5.96993
		0.039	5.94954
		0.0392	5.9291
		0.0394	5.9086
		0.0396	5.88806
		0.0398	5.86747
		0.04	5.84684
		0.0402	5.82617
		0.0404	5.80546
		0.0406	5.78471
		0.0408	5.76392
		0.041	5.7431
		0.0412	5.72225
		0.0414	5.70137
		0.0416	5.68046
		0.0418	5.65952
		0.042	5.63856
		0.0422	5.61758
		0.0424	5.59658
		0.0426	5.57557
		0.0428	5.55453
		0.043	5.53348
		0.0432	5.51242
		0.0434	5.49135
		0.0436	5.47028
		0.0438	5.44919
		0.044	5.4281
		0.0442	5.40701
		0.0444	5.38591
		0.0446	5.36482
		0.0448	5.34373
		0.045	5.32264
		0.0452	5.30156
		0.0454	5.28048
		0.0456	5.25942
		0.0458	5.23836
		0.046	5.21732
		0.0462	5.19629
		0.0464	5.17528
		0.0466	5.15429
		0.0468	5.13331
		0.047	5.11235
		0.0472	5.09142
		0.0474	5.0705
		0.0476	5.04962
		0.0478	5.02875
		0.048	5.00792
		0.0482	4.98711
		0.0484	4.96634
		0.0486	4.94559
		0.0488	4.92488
		0.049	4.9042
		0.0492	4.88356
		0.0494	4.86295
		0.0496	4.84239
		0.0498	4.82186
		0.05	4.80137
		0.0502	4.78092
		0.0504	4.76051
		0.0506	4.74015
		0.0508	4.71983
		0.051	4.69955
		0.0512	4.67933
		0.0514	4.65915
		0.0516	4.63901
		0.0518	4.61893
		0.052	4.5989
		0.0522	4.57892
		0.0524	4.55899
		0.0526	4.53911
		0.0528	4.51928
		0.053	4.49951
		0.0532	4.4798
		0.0534	4.46014
		0.0536	4.44053
		0.0538	4.42099
		0.054	4.4015
		0.0542	4.38207
		0.0544	4.36269
		0.0546	4.34338
		0.0548	4.32413
		0.055	4.30493
		0.0552	4.2858
		0.0554	4.26673
		0.0556	4.24772
		0.0558	4.22877
		0.056	4.20988
		0.0562	4.19106
		0.0564	4.1723
		0.0566	4.15361
		0.0568	4.13497
		0.057	4.1164
		0.0572	4.0979
		0.0574	4.07946
		0.0576	4.06108
		0.0578	4.04277
		0.058	4.02453
		0.0582	4.00634
		0.0584	3.98823
		0.0586	3.97018
		0.0588	3.95219
		0.059	3.93427
		0.0592	3.91642
		0.0594	3.89863
		0.0596	3.8809
		0.0598	3.86325
		0.06	3.84565
		0.0602	3.82812
		0.0604	3.81066
		0.0606	3.79326
		0.0608	3.77593
		0.061	3.75866
		0.0612	3.74146
		0.0614	3.72432
		0.0616	3.70725
		0.0618	3.69024
		0.062	3.67329
		0.0622	3.65641
		0.0624	3.63959
		0.0626	3.62284
		0.0628	3.60615
		0.063	3.58952
		0.0632	3.57295
		0.0634	3.55645
		0.0636	3.54001
		0.0638	3.52362
		0.064	3.50731
		0.0642	3.49105
		0.0644	3.47485
		0.0646	3.45871
		0.0648	3.44264
		0.065	3.42662
		0.0652	3.41066
		0.0654	3.39477
		0.0656	3.37893
		0.0658	3.36315
		0.066	3.34742
		0.0662	3.33176
		0.0664	3.31615
		0.0666	3.3006
		0.0668	3.2851
		0.067	3.26966
		0.0672	3.25428
		0.0674	3.23895
		0.0676	3.22368
		0.0678	3.20846
		0.068	3.19329
		0.0682	3.17818
		0.0684	3.16313
		0.0686	3.14812
		0.0688	3.13317
		0.069	3.11827
		0.0692	3.10342
		0.0694	3.08862
		0.0696	3.07388
		0.0698	3.05918
		0.07	3.04454
		0.0702	3.02994
		0.0704	3.01539
		0.0706	3.0009
		0.0708	2.98645
		0.071	2.97205
		0.0712	2.9577
		0.0714	2.94339
		0.0716	2.92914
		0.0718	2.91493
		0.072	2.90077
		0.0722	2.88665
		0.0724	2.87258
		0.0726	2.85856
		0.0728	2.84458
		0.073	2.83064
		0.0732	2.81676
		0.0734	2.80291
		0.0736	2.78911
		0.0738	2.77536
		0.074	2.76165
		0.0742	2.74798
		0.0744	2.73436
		0.0746	2.72078
		0.0748	2.70724
		0.075	2.69375
		0.0752	2.6803
		0.0754	2.66689
		0.0756	2.65352
		0.0758	2.6402
		0.076	2.62692
		0.0762	2.61368
		0.0764	2.60048
		0.0766	2.58732
		0.0768	2.57421
		0.077	2.56114
		0.0772	2.54811
		0.0774	2.53512
		0.0776	2.52217
		0.0778	2.50926
		0.078	2.49639
		0.0782	2.48357
		0.0784	2.47079
		0.0786	2.45804
		0.0788	2.44534
		0.079	2.43268
		0.0792	2.42007
		0.0794	2.40749
		0.0796	2.39495
		0.0798	2.38246
		0.08	2.37
		0.0802	2.35759
		0.0804	2.34522
		0.0806	2.33289
		0.0808	2.32061
		0.081	2.30836
		0.0812	2.29616
		0.0814	2.284
		0.0816	2.27188
		0.0818	2.2598
		0.082	2.24777
		0.0822	2.23577
		0.0824	2.22383
		0.0826	2.21192
		0.0828	2.20006
		0.083	2.18824
		0.0832	2.17646
		0.0834	2.16473
		0.0836	2.15304
		0.0838	2.14139
		0.084	2.12979
		0.0842	2.11823
		0.0844	2.10672
		0.0846	2.09525
		0.0848	2.08383
		0.085	2.07245
		0.0852	2.06112
		0.0854	2.04984
		0.0856	2.0386
		0.0858	2.0274
		0.086	2.01626
		0.0862	2.00515
		0.0864	1.9941
		0.0866	1.98309
		0.0868	1.97213
		0.087	1.96122
		0.0872	1.95036
		0.0874	1.93954
		0.0876	1.92877
		0.0878	1.91805
		0.088	1.90738
		0.0882	1.89676
		0.0884	1.88619
		0.0886	1.87566
		0.0888	1.86519
		0.089	1.85477
		0.0892	1.84439
		0.0894	1.83407
		0.0896	1.8238
		0.0898	1.81358
		0.09	1.80341
		0.0902	1.79329
		0.0904	1.78322
		0.0906	1.7732
		0.0908	1.76324
		0.091	1.75333
		0.0912	1.74347
		0.0914	1.73366
		0.0916	1.7239
		0.0918	1.7142
		0.092	1.70455
		0.0922	1.69495
		0.0924	1.68541
		0.0926	1.67592
		0.0928	1.66648
		0.093	1.6571
		0.0932	1.64777
		0.0934	1.63849
		0.0936	1.62927
		0.0938	1.6201
		0.094	1.61098
		0.0942	1.60192
		0.0944	1.59291
		0.0946	1.58396
		0.0948	1.57506
		0.095	1.56622
		0.0952	1.55743
		0.0954	1.54869
		0.0956	1.54001
		0.0958	1.53138
		0.096	1.5228
		0.0962	1.51428
		0.0964	1.50582
		0.0966	1.4974
		0.0968	1.48904
		0.097	1.48074
		0.0972	1.47249
		0.0974	1.46429
		0.0976	1.45614
		0.0978	1.44805
		0.098	1.44001
		0.0982	1.43203
		0.0984	1.42409
		0.0986	1.41621
		0.0988	1.40838
		0.099	1.40061
		0.0992	1.39288
		0.0994	1.38521
		0.0996	1.37759
		0.0998	1.37002
		0.1	1.3625
		0.1002	1.35503
		0.1004	1.34761
		0.1006	1.34024
		0.1008	1.33292
		0.101	1.32566
		0.1012	1.31843
		0.1014	1.31126
		0.1016	1.30414
		0.1018	1.29706
		0.102	1.29004
		0.1022	1.28306
		0.1024	1.27612
		0.1026	1.26923
		0.1028	1.26239
		0.103	1.2556
		0.1032	1.24884
		0.1034	1.24214
		0.1036	1.23548
		0.1038	1.22886
		0.104	1.22228
		0.1042	1.21575
		0.1044	1.20926
		0.1046	1.20281
		0.1048	1.1964
		0.105	1.19003
		0.1052	1.1837
		0.1054	1.17742
		0.1056	1.17117
		0.1058	1.16496
		0.106	1.15878
		0.1062	1.15265
		0.1064	1.14655
		0.1066	1.14049
		0.1068	1.13446
		0.107	1.12847
		0.1072	1.12251
		0.1074	1.11659
		0.1076	1.1107
		0.1078	1.10484
		0.108	1.09902
		0.1082	1.09322
		0.1084	1.08746
		0.1086	1.08173
		0.1088	1.07603
		0.109	1.07035
		0.1092	1.06471
		0.1094	1.05909
		0.1096	1.0535
		0.1098	1.04793
		0.11	1.04239
		0.1102	1.03688
		0.1104	1.03139
		0.1106	1.02593
		0.1108	1.02048
		0.111	1.01507
		0.1112	1.00967
		0.1114	1.00429
		0.1116	0.998941
		0.1118	0.993607
		0.112	0.988294
		0.1122	0.982999
		0.1124	0.977723
		0.1126	0.972465
		0.1128	0.967224
		0.113	0.962
		0.1132	0.956793
		0.1134	0.951601
		0.1136	0.946424
		0.1138	0.941261
		0.114	0.936113
		0.1142	0.930978
		0.1144	0.925856
		0.1146	0.920747
		0.1148	0.915649
		0.115	0.910563
		0.1152	0.905488
		0.1154	0.900423
		0.1156	0.895367
		0.1158	0.890322
		0.116	0.885285
		0.1162	0.880257
		0.1164	0.875237
		0.1166	0.870224
		0.1168	0.865219
		0.117	0.86022
		0.1172	0.855228
		0.1174	0.850242
		0.1176	0.845261
		0.1178	0.840286
		0.118	0.835315
		0.1182	0.830349
		0.1184	0.825387
		0.1186	0.820429
		0.1188	0.815475
		0.119	0.810523
		0.1192	0.805575
		0.1194	0.80063
		0.1196	0.795686
		0.1198	0.790745
		0.12	0.785806
		0.1202	0.780869
		0.1204	0.775933
		0.1206	0.770999
		0.1208	0.766065
		0.121	0.761133
		0.1212	0.756201
		0.1214	0.75127
		0.1216	0.74634
		0.1218	0.74141
		0.122	0.73648
		0.1222	0.73155
		0.1224	0.726621
		0.1226	0.721692
		0.1228	0.716762
		0.123	0.711833
		0.1232	0.706903
		0.1234	0.701974
		0.1236	0.697044
		0.1238	0.692114
		0.124	0.687184
		0.1242	0.682255
		0.1244	0.677325
		0.1246	0.672395
		0.1248	0.667466
		0.125	0.662537
		0.1252	0.657608
		0.1254	0.65268
		0.1256	0.647752
		0.1258	0.642825
		0.126	0.637899
		0.1262	0.632974
		0.1264	0.62805
		0.1266	0.623127
		0.1268	0.618206
		0.127	0.613287
		0.1272	0.60837
		0.1274	0.603455
		0.1276	0.598542
		0.1278	0.593632
		0.128	0.588725
		0.1282	0.583822
		0.1284	0.578921
		0.1286	0.574025
		0.1288	0.569132
		0.129	0.564243
		0.1292	0.55936
		0.1294	0.554481
		0.1296	0.549607
		0.1298	0.544739
		0.13	0.539876
		0.1302	0.53502
		0.1304	0.53017
		0.1306	0.525328
		0.1308	0.520492
		0.131	0.515664
		0.1312	0.510844
		0.1314	0.506032
		0.1316	0.501229
		0.1318	0.496435
		0.132	0.491651
		0.1322	0.486876
		0.1324	0.482112
		0.1326	0.477358
		0.1328	0.472615
		0.133	0.467884
		0.1332	0.463164
		0.1334	0.458456
		0.1336	0.453762
		0.1338	0.44908
		0.134	0.444411
		0.1342	0.439757
		0.1344	0.435117
		0.1346	0.430491
		0.1348	0.42588
		0.135	0.421285
		0.1352	0.416706
		0.1354	0.412143
		0.1356	0.407596
		0.1358	0.403067
		0.136	0.398555
		0.1362	0.394061
		0.1364	0.389586
		0.1366	0.385129
		0.1368	0.380691
		0.137	0.376272
		0.1372	0.371874
		0.1374	0.367495
		0.1376	0.363138
		0.1378	0.358801
		0.138	0.354485
		0.1382	0.350192
		0.1384	0.34592
		0.1386	0.341671
		0.1388	0.337445
		0.139	0.333241
		0.1392	0.329062
		0.1394	0.324906
		0.1396	0.320774
		0.1398	0.316667
		0.14	0.312585
		0.1402	0.308528
		0.1404	0.304496
		0.1406	0.30049
		0.1408	0.29651
		0.141	0.292557
		0.1412	0.28863
		0.1414	0.28473
		0.1416	0.280857
		0.1418	0.277012
		0.142	0.273194
		0.1422	0.269405
		0.1424	0.265643
		0.1426	0.26191
		0.1428	0.258206
		0.143	0.25453
		0.1432	0.250884
		0.1434	0.247267
		0.1436	0.243679
		0.1438	0.240121
		0.144	0.236593
		0.1442	0.233095
		0.1444	0.229627
		0.1446	0.226189
		0.1448	0.222782
		0.145	0.219405
		0.1452	0.21606
		0.1454	0.212745
		0.1456	0.209461
		0.1458	0.206208
		0.146	0.202986
		0.1462	0.199796
		0.1464	0.196637
		0.1466	0.19351
		0.1468	0.190414
		0.147	0.187349
		0.1472	0.184316
		0.1474	0.181315
		0.1476	0.178346
		0.1478	0.175408
		0.148	0.172502
		0.1482	0.169627
		0.1484	0.166785
		0.1486	0.163974
		0.1488	0.161195
		0.149	0.158447
		0.1492	0.155731
		0.1494	0.153047
		0.1496	0.150395
		0.1498	0.147774
		0.15	0.145184
		0.1502	0.142626
		0.1504	0.140099
		0.1506	0.137604
		0.1508	0.135139
		0.151	0.132706
		0.1512	0.130304
		0.1514	0.127933
		0.1516	0.125592
		0.1518	0.123282
		0.152	0.121003
		0.1522	0.118754
		0.1524	0.116536
		0.1526	0.114347
		0.1528	0.112189
		0.153	0.11006
		0.1532	0.107961
		0.1534	0.105892
		0.1536	0.103852
		0.1538	0.101841
		0.154	0.0998593
		0.1542	0.0979064
		0.1544	0.0959821
		0.1546	0.0940863
		0.1548	0.0922188
		0.155	0.0903793
		0.1552	0.0885678
		0.1554	0.0867839
		0.1556	0.0850274
		0.1558	0.0832982
		0.156	0.0815961
		0.1562	0.0799208
		0.1564	0.0782721
		0.1566	0.0766497
		0.1568	0.0750535
		0.157	0.0734832
		0.1572	0.0719385
		0.1574	0.0704193
		0.1576	0.0689254
		0.1578	0.0674563
		0.158	0.066012
		0.1582	0.0645922
		0.1584	0.0631966
		0.1586	0.061825
		0.1588	0.0604771
		0.159	0.0591527
		0.1592	0.0578515
		0.1594	0.0565733
		0.1596	0.0553178
		0.1598	0.0540848
		0.16	0.052874
		0.1602	0.0516851
		0.1604	0.0505179
		0.1606	0.0493722
		0.1608	0.0482476
		0.161	0.047144
		0.1612	0.046061
		0.1614	0.0449983
		0.1616	0.0439559
		0.1618	0.0429332
		0.162	0.0419303
		0.1622	0.0409466
		0.1624	0.0399821
		0.1626	0.0390364
		0.1628	0.0381092
		0.163	0.0372004
		0.1632	0.0363097
		0.1634	0.0354367
		0.1636	0.0345814
		0.1638	0.0337433
		0.164	0.0329222
		0.1642	0.032118
		0.1644	0.0313302
		0.1646	0.0305588
		0.1648	0.0298034
		0.165	0.0290638
		0.1652	0.0283398
		0.1654	0.0276311
		0.1656	0.0269374
		0.1658	0.0262585
		0.166	0.0255943
		0.1662	0.0249443
		0.1664	0.0243085
		0.1666	0.0236866
		0.1668	0.0230782
		0.167	0.0224833
		0.1672	0.0219016
		0.1674	0.0213329
		0.1676	0.0207768
		0.1678	0.0202333
		0.168	0.0197021
		0.1682	0.0191829
		0.1684	0.0186756
		0.1686	0.0181799
		0.1688	0.0176956
		0.169	0.0172226
		0.1692	0.0167606
		0.1694	0.0163093
		0.1696	0.0158687
		0.1698	0.0154385
		0.17	0.0150185
		0.1702	0.0146085
		0.1704	0.0142083
		0.1706	0.0138177
		0.1708	0.0134366
		0.171	0.0130647
		0.1712	0.0127019
		0.1714	0.0123479
		0.1716	0.0120027
		0.1718	0.011666
		0.172	0.0113377
		0.1722	0.0110175
		0.1724	0.0107053
		0.1726	0.010401
		0.1728	0.0101044
		0.173	0.0098153
		0.1732	0.00953355
		0.1734	0.00925901
		0.1736	0.00899151
		0.1738	0.00873091
		0.174	0.00847705
		0.1742	0.0082298
		0.1744	0.007989
		0.1746	0.00775451
		0.1748	0.00752619
		0.175	0.0073039
		0.1752	0.00708751
		0.1754	0.00687688
		0.1756	0.00667189
		0.1758	0.00647239
		0.176	0.00627827
		0.1762	0.0060894
		0.1764	0.00590566
		0.1766	0.00572693
		0.1768	0.00555309
		0.177	0.00538402
		0.1772	0.00521962
		0.1774	0.00505976
		0.1776	0.00490435
		0.1778	0.00475326
		0.178	0.00460641
		0.1782	0.00446368
		0.1784	0.00432497
		0.1786	0.00419019
		0.1788	0.00405923
		0.179	0.00393201
		0.1792	0.00380842
		0.1794	0.00368839
		0.1796	0.0035718
		0.1798	0.00345858
		0.18	0.00334865
		0.1802	0.00324192
		0.1804	0.00313831
		0.1806	0.00303773
		0.1808	0.00294011
		0.181	0.00284537
		0.1812	0.00275343
		0.1814	0.00266423
		0.1816	0.00257768
		0.1818	0.00249372
		0.182	0.00241228
		0.1822	0.00233329
		0.1824	0.00225669
		0.1826	0.00218241
		0.1828	0.00211038
		0.183	0.00204055
		0.1832	0.00197286
		0.1834	0.00190723
		0.1836	0.00184363
		0.1838	0.001782
		0.184	0.00172226
		0.1842	0.00166439
		0.1844	0.00160833
		0.1846	0.00155402
		0.1848	0.00150141
		0.185	0.00145046
		0.1852	0.00140111
		0.1854	0.00135332
		0.1856	0.00130706
		0.1858	0.00126226
		0.186	0.0012189
		0.1862	0.00117692
		0.1864	0.00113629
		0.1866	0.00109697
		0.1868	0.00105892
		0.187	0.0010221
		0.1872	0.000986481
		0.1874	0.000952008
		0.1876	0.000918674
		0.1878	0.000886432
		0.188	0.000855249
		0.1882	0.000825094
		0.1884	0.000795935
		0.1886	0.000767742
		0.1888	0.000740486
		0.189	0.000714138
		0.1892	0.00068867
		0.1894	0.000664055
		0.1896	0.000640267
		0.1898	0.00061728
		0.19	0.000595056
		0.1902	0.000573598
		0.1904	0.000552868
		0.1906	0.000532843
		0.1908	0.000513502
		0.191	0.000494822
		0.1912	0.000476783
		0.1914	0.000459364
		0.1916	0.000442545
		0.1918	0.000426308
		0.192	0.000410634
		0.1922	0.000395504
		0.1924	0.000380888
		0.1926	0.000366796
		0.1928	0.000353196
		0.193	0.000340073
		0.1932	0.000327412
		0.1934	0.000315197
		0.1936	0.000303414
		0.1938	0.000292049
		0.194	0.000281086
		0.1942	0.000270514
		0.1944	0.00026032
		0.1946	0.000250489
		0.1948	0.000241012
		0.195	0.000231874
		0.1952	0.000223054
		0.1954	0.000214564
		0.1956	0.000206382
		0.1958	0.000198484
		0.196	0.000190885
		0.1962	0.000183564
		0.1964	0.000176509
		0.1966	0.000169713
		0.1968	0.000163166
		0.197	0.000156859
		0.1972	0.000150785
		0.1974	0.000144935
		0.1976	0.000139301
		0.1978	0.000133877
		0.198	0.000128654
		0.1982	0.000123625
		0.1984	0.000118784
		0.1986	0.000114124
		0.1988	0.000109639
		0.199	0.000105322
		0.1992	0.000101167
		0.1994	9.71697e-05
		0.1996	9.33231e-05
		0.1998	8.96221e-05
[truncated: 1 more rows]

## Sheet: RAP
Time	Grain	Sample	44Ca	46Ti	47Ti	48Ti	49Ti	50Ti	49Ti/47Ti	se	46Ti/47Ti	se	48Ti/47Ti	se	δ49/47Ti	2se	δ46/47Ti	δ48/47Ti
2022-02-16	One Grain Profile	RAP_001	-7.58476e-06	3.28494	3.08161	31.7829	2.42342	2.43381	0.786413	1.69679e-05	1.06598	2.07287e-05	10.3137	0.000176771
		RAP_002	2.68848e-06	3.26211	3.06011	31.5615	2.40657	2.41675	0.786433	1.70037e-05	1.06601	2.56013e-05	10.3138	0.000180487	-0.0189581	0.0432419	0.0223646	-0.00788369
		RAP_003	2.44508e-06	3.17268	2.97628	30.6978	2.34079	2.35039	0.786482	1.63676e-05	1.06599	2.2656e-05	10.3141	0.000164544	0.037905	0.0416238	-0.00441447	0.00672554
		RAP_004	2.7815e-06	3.14917	2.95425	30.4709	2.32343	2.33265	0.786471	1.57537e-05	1.06598	2.53524e-05	10.3143	0.000169274	-0.00161703	0.0400616	-0.000598275	0.00884035
		RAP_005	4.11978e-06	3.13642	2.94231	30.3476	2.31402	2.32193	0.786463	1.58205e-05	1.06597	2.39339e-05	10.3142	0.000156907	0.000832185	0.0402321	0.000619417	0.0156066
		RAP_006	-2.06074e-06	3.02982	2.84233	29.3155	2.23537	2.24329	0.786454	1.71302e-05	1.06596	2.37883e-05	10.3139	0.000169788	-0.0410939	0.0435614	-0.0246598	-0.0550727
		RAP_007	1.47841e-05	2.93869	2.75673	28.4347	2.1682	2.17727	0.786509	1.63429e-05	1.066	2.36716e-05	10.3146	0.00018926	0.0753597	0.0415611	0.0225298	0.0616849
		RAP_008	-1.43696e-05	2.98368	2.79895	28.8687	2.20122	2.21038	0.786446	1.83124e-05	1.066	2.69829e-05	10.3141	0.000200366	-0.0409454	0.046568	0.0193132	-0.026875
		RAP_009	1.07413e-05	2.97707	2.79287	28.8062	2.19645	2.20567	0.786447	1.62717e-05	1.06595	2.16981e-05	10.3142	0.000173409	0.0057231	0.0413805	-0.0439952	0.00996447
		RAP_010	3.45924e-05	3.01075	2.82434	29.1304	2.22118	2.22982	0.78644	1.72551e-05	1.066	2.26481e-05	10.314	0.000166396	-0.0272053	0.0438805	0.0274407	-0.0235281
		RAP_011	-4.28144e-06	3.02703	2.83964	29.2891	2.23331	2.2404	0.786475	1.79958e-05	1.06599	2.33487e-05	10.3144	0.000175534	0.0225518	0.0457644	0.00463208	0.0238314
		RAP_012	1.72898e-05	2.98328	2.79865	28.8659	2.20107	2.20863	0.786474	1.93097e-05	1.06597	2.62803e-05	10.3142	0.000194634	-0.00133189	0.0491043	-0.0205624	-0.0134832
		RAP_013	-2.79593e-05	2.96211	2.77873	28.6608	2.18541	2.1943	0.786476	1.7356e-05	1.06599	2.53519e-05	10.3143	0.000178829	-0.0179179	0.0441353	-0.00262097	-0.00845066
		RAP_014	-1.72205e-05	2.89006	2.71107	27.9637	2.13227	2.14097	0.786506	1.79e-05	1.06602	2.29909e-05	10.3146	0.000178693	0.023329	0.0455189	0.0391917	0.0196024
		RAP_015	1.35001e-05	2.90836	2.72838	28.1419	2.14587	2.15488	0.786499	1.7148e-05	1.06596	2.45357e-05	10.3145	0.000170707	-0.000317816	0.043606	-0.0334253	0.0111341
		RAP_016	-4.01115e-06	2.98136	2.79682	28.8469	2.19968	2.20811	0.786492	1.65579e-05	1.06598	2.44884e-05	10.3142	0.000167631	-0.000842872	0.0421058	0.00846825	-0.0274313
		RAP_017	-7.43242e-06	2.9131	2.73279	28.1871	2.14931	2.15641	0.786487	1.85262e-05	1.06598	2.50807e-05	10.3144	0.000160947	0.00338707	0.0471113	0.00928578	0.0166461
		RAP_018	9.91643e-07	2.89628	2.71707	28.0246	2.13692	2.14433	0.786477	2.0328e-05	1.06596	2.32243e-05	10.3143	0.000204171	-0.0506031	0.0516912	-0.00640139	-0.0277149
		RAP_019	1.6014e-06	2.86374	2.68656	27.7111	2.1131	2.12039	0.786546	1.79678e-05	1.06595	2.62042e-05	10.3147	0.000175458
2022-02-16	One Grain Profile	RAP_001	-1.55738e-06	3.38393	3.17459	32.7473	2.49729	2.51747	0.786651	2.00414e-05	1.06594	2.53476e-05	10.3155	0.000186947
		RAP_002	-7.08421e-06	3.38361	3.17422	32.7426	2.4969	2.51642	0.786618	1.7941e-05	1.06597	2.00514e-05	10.3152	0.000166091	-0.0497601	0.0456134	0.0235557	-0.0305388
		RAP_003	1.52914e-05	3.36111	3.15319	32.5267	2.48049	2.49979	0.786663	1.65234e-05	1.06594	2.48671e-05	10.3155	0.000177144	0.0296907	0.0420102	-0.0145814	0.0159396
		RAP_004	-1.83168e-05	3.34569	3.13871	32.3774	2.4691	2.48868	0.786662	1.81777e-05	1.06594	2.41481e-05	10.3155	0.000178372	0.0343948	0.0462164	0.00560401	0.0186939
		RAP_005	-6.92014e-06	3.3424	3.13565	32.3446	2.46652	2.48588	0.786606	1.4899e-05	1.06593	2.38052e-05	10.3151	0.000162425	-0.0558244	0.0378797	-0.0255578	-0.0421147
		RAP_006	-5.76413e-06	3.3193	3.11384	32.1213	2.44947	2.46837	0.786638	1.80873e-05	1.06598	2.19117e-05	10.3156	0.000164577	0.010711	0.0459869	0.0168426	0.0234604
		RAP_007	4.17851e-06	3.33965	3.1329	32.3179	2.46451	2.48295	0.786654	1.99646e-05	1.06599	2.29512e-05	10.3156	0.000166872	0.0377937	0.0507602	0.0241734	0.0219405
		RAP_008	6.15985e-06	3.30688	3.10228	32.0006	2.44028	2.45928	0.786609	1.83315e-05	1.06595	2.5731e-05	10.3152	0.000179114	-0.0229848	0.0466078	-0.0393862	-0.0284952
		RAP_009	-6.00428e-06	3.29811	3.09393	31.9149	2.43369	2.4517	0.786601	1.78055e-05	1.06599	2.74721e-05	10.3153	0.000172592	0.0307464	0.0452734	0.0186868	0.0349606
		RAP_010	9.49783e-07	3.30094	3.09658	31.9404	2.4356	2.45481	0.786545	1.91796e-05	1.06599	2.74025e-05	10.3148	0.00019695	-0.0443672	0.0487671	0.00260559	-0.029893
		RAP_011	3.73456e-06	3.3013	3.09692	31.9441	2.43591	2.45521	0.786559	1.96867e-05	1.06599	2.72451e-05	10.3148	0.000189826	0.00746894	0.0500583	0.000336551	0.0016198
		RAP_012	-2.63942e-06	3.32666	3.12072	32.1896	2.45464	2.47344	0.78656	1.88503e-05	1.06599	2.49907e-05	10.3148	0.000184971	0.00772652	0.0479314	-0.000635342	-0.00467711
		RAP_013	8.61977e-06	3.34753	3.14031	32.392	2.47001	2.4891	0.78655	1.83636e-05	1.06599	2.5295e-05	10.3149	0.000191838	0.024027	0.0466952	-0.0192222	0.0255348
		RAP_014	1.83126e-05	3.32599	3.11999	32.1811	2.45387	2.47302	0.786502	1.855e-05	1.06603	2.60338e-05	10.3145	0.000177273	-0.0745086	0.0471673	0.014943	-0.0436183
		RAP_015	7.34244e-06	3.32325	3.11739	32.1558	2.45205	2.47085	0.786571	1.71158e-05	1.06603	2.32566e-05	10.3149	0.000179725	0.0868565	0.0435239	0.000565589	0.0365431
		RAP_016	4.08674e-06	3.3155	3.11011	32.0798	2.44611	2.46467	0.786503	2.01147e-05	1.06604	2.73866e-05	10.3147	0.000189005	-0.0796416	0.0511455	0.049617	-0.0246591
		RAP_017	-3.62645e-06	3.29468	3.09087	31.882	2.43116	2.44823	0.786561	1.94114e-05	1.06594	2.87159e-05	10.3149	0.000202498	0.092169	0.0493623	-0.077169	0.0358554
		RAP_018	1.72731e-05	3.34074	3.13389	32.3242	2.46472	2.48366	0.786473	1.84389e-05	1.066	2.45761e-05	10.3144	0.000183578	-0.102245	0.0468852	0.0184586	-0.0458228
		RAP_019	-9.0034e-06	3.30609	3.10131	31.9894	2.43932	2.45782	0.786547	2.0005e-05	1.06603	2.47425e-05	10.3148	0.0001764
2022-02-16	Grain 1	RAP_001	-2.7822e-05	3.44037	3.22712	33.2811	2.53743	2.54873	0.78628	1.76423e-05	1.06608	2.40245e-05	10.3129	0.000185593
		RAP_002	5.40839e-06	3.55155	3.33125	34.3569	2.61955	2.63034	0.786356	1.84831e-05	1.06613	2.46811e-05	10.3135	0.000189531	0.0382422	0.0470113	0.0489801	0.0268889
		RAP_003	7.78804e-06	3.55293	3.33271	34.372	2.62075	2.63154	0.786372	1.70682e-05	1.06608	2.37597e-05	10.3135	0.000173456	-0.0250067	0.0434089	-0.0107588	-0.0264139
	Grain 2	RAP_004	1.65198e-06	3.36052	3.15232	32.5133	2.47907	2.48689	0.786427	1.6754e-05	1.06605	2.41681e-05	10.3141	0.000166565	0.0322668	0.0426092	-0.0190929	0.034418
		RAP_005	2.1187e-05	3.39793	3.18737	32.8744	2.50665	2.51443	0.786432	1.69328e-05	1.06606	2.36487e-05	10.3139	0.000182503	0.0349285	0.0430639	-0.0117526	-0.00702537
		RAP_006	1.63831e-05	3.49722	3.2804	33.8339	2.57964	2.58889	0.786381	1.64322e-05	1.0661	2.15962e-05	10.314	0.000167904	-0.036866	0.0417905	-0.00143675	-0.00644371
		RAP_007	-2.54211e-06	3.52256	3.30404	34.0782	2.59826	2.60704	0.786388	1.59628e-05	1.06613	2.3823e-05	10.3141	0.000171459	7.85045e-05	0.0405978	0.0351331	0.00552751
		RAP_008	8.21156e-06	3.49429	3.27763	33.8059	2.57752	2.58609	0.786396	1.91781e-05	1.0661	2.39227e-05	10.3141	0.000200591	-0.0153738	0.048774	0.00169493	0.0115355
		RAP_009	1.05146e-05	3.48243	3.26664	33.6918	2.56897	2.57872	0.786427	1.85917e-05	1.06606	2.74652e-05	10.3139	0.0002012	0.0559836	0.0472841	-0.0328476	-0.00227259
		RAP_010	8.37334e-06	3.54083	3.32132	34.2552	2.61179	2.62205	0.786371	1.76086e-05	1.06609	2.43997e-05	10.3137	0.000178401	-0.0526208	0.0447821	0.0205947	-0.0176383
		RAP_011	1.23986e-05	3.58116	3.35919	34.6465	2.64166	2.65104	0.786397	1.6013e-05	1.06608	2.53418e-05	10.3139	0.000173394	0.0187123	0.0407257	-0.00582878	0.0140917
		RAP_012	1.53425e-05	3.56916	3.34794	34.5301	2.6328	2.6423	0.786394	1.58721e-05	1.06608	2.42244e-05	10.3138	0.000172793	0.0136234	0.0403674	-0.00846393	0.00891233
		RAP_013	4.62212e-06	3.63343	3.40817	35.1504	2.68008	2.68968	0.786369	1.57101e-05	1.06609	2.28463e-05	10.3136	0.000179199	-0.0515765	0.0399541	0.013309	-0.036629
		RAP_014	1.2059e-05	3.5669	3.3458	34.5087	2.63122	2.64145	0.786425	1.60609e-05	1.06608	1.77157e-05	10.314	0.000147	0.0689658	0.0408482	-0.0312765	0.0321584
		RAP_015	6.63539e-08	3.55727	3.33659	34.4131	2.62381	2.63453	0.786373	1.57846e-05	1.06614	2.05697e-05	10.3139	0.000143893	-0.0604798	0.0401429	0.025197	-0.0206499
		RAP_016	-1.52863e-06	3.52381	3.3052	34.0902	2.59927	2.60975	0.786416	1.5393e-05	1.06614	2.20687e-05	10.3141	0.00016676	0.0157917	0.0391477	0.0471785	0.0184624
		RAP_017	-1.66605e-05	3.47621	3.26086	33.6323	2.56445	2.57381	0.786435	1.63529e-05	1.06604	2.1133e-05	10.314	0.000161033	0.0341514	0.0415889	-0.0700687	-0.0113643
		RAP_018	5.99731e-06	3.45844	3.24403	33.4591	2.5511	2.56044	0.786399	1.90902e-05	1.06609	2.75333e-05	10.314	0.000191865	-0.0356211	0.0485492	0.0115803	-8.32284e-05
		RAP_019	7.52605e-06	3.36536	3.15665	32.5581	2.48245	2.49293	0.78642	1.79779e-05	1.06612	2.52802e-05	10.3141	0.000185459
2022-02-17	Grain 1	RAP_001	1.29222e-05	3.97641	3.73046	38.4842	2.93501	2.94696	0.786769	1.83161e-05	1.06593	2.45037e-05	10.3162	0.000180588
	Grain 2	RAP_002	-1.18679e-05	3.96973	3.7246	38.4275	2.93083	2.94243	0.786884	1.7664e-05	1.06581	2.2831e-05	10.3172	0.000181048	0.0602434	0.0448989	-0.0465079	0.0428032
	Grain 3	RAP_003	8.74306e-06	3.79407	3.55986	36.7283	2.80127	2.81138	0.786904	1.71091e-05	1.06579	1.97298e-05	10.3173	0.000154723	0.0348526	0.043486	-0.0102955	0.0280877
	Grain 4	RAP_004	-1.19048e-05	3.84134	3.60419	37.184	2.83603	2.84635	0.78687	1.87015e-05	1.0658	2.34959e-05	10.3169	0.000187746	-0.0104456	0.0475333	0.0167306	-0.0281025
	Grain 5	RAP_005	-1.28846e-05	3.56957	3.3493	34.5548	2.6354	2.64625	0.786851	1.57619e-05	1.06576	1.93361e-05	10.317	0.000168117	-0.0688531	0.0400604	-0.00394839	-0.0140465
	Grain 6	RAP_006	-1.64248e-05	3.54722	3.3284	34.3406	2.61926	2.63045	0.786942	1.43003e-05	1.06574	2.05909e-05	10.3174	0.000152162	0.121242	0.0363484	-0.0655604	0.0526771
	Grain 7	RAP_007	1.75817e-06	3.64994	3.42441	35.3289	2.69447	2.70578	0.786841	1.69042e-05	1.06586	2.07261e-05	10.3168	0.000163458	0.0336242	0.0429688	0.0345461	0.014555
	Grain 8	RAP_008	2.67674e-06	3.55808	3.3381	34.4352	2.62604	2.64518	0.786687	1.65649e-05	1.0659	2.18412e-05	10.3158	0.000167685	-0.0968712	0.042109	0.0318108	-0.029986
	Grain 9	RAP_009	2.18602e-05	3.57424	3.35334	34.5911	2.63802	2.65507	0.786686	1.57946e-05	1.06587	2.06629e-05	10.3154	0.00016463	-0.0413847	0.0401532	0.0175767	-0.0386061
	Grain 10	RAP_010	1.78911e-05	3.17971	2.98336	30.776	2.34717	2.36581	0.78675	1.65937e-05	1.06581	2.20535e-05	10.3159	0.000166623	0.0227565	0.0421838	-0.0515272	0.0117639
	Grain 11	RAP_011	-1.29263e-05	3.39557	3.18576	32.8646	2.50649	2.52373	0.786779	1.75514e-05	1.06586	2.23251e-05	10.3161	0.00016186	0.0122524	0.0446165	0.0454416	0.000950798
	Grain 12	RAP_012	1.43355e-05	3.30861	3.10431	32.0249	2.44244	2.45922	0.786787	1.57278e-05	1.06581	2.09104e-05	10.3163	0.000164936	0.0637308	0.0399824	-0.0453188	0.0417532
	Grain 13	RAP_013	-1.55145e-05	3.19774	3.00015	30.9484	2.36021	2.37751	0.786696	1.50365e-05	1.06586	1.8851e-05	10.3156	0.000154336	-0.0120889	0.0382265	-0.00492625	-0.0204109
	Grain 14	RAP_014	1.42906e-06	3.51312	3.29587	33.998	2.59261	2.61116	0.786624	1.54949e-05	1.06591	2.06936e-05	10.3153	0.000160683	-0.100618	0.0393919	0.0429831	-0.0423601
	Grain 15	RAP_015	4.07328e-06	3.46494	3.25077	33.5348	2.55742	2.57621	0.78671	1.69876e-05	1.06588	2.37642e-05	10.3159	0.000169521	0.0583716	0.0431889	-0.0399351	0.0301971
	Grain 16	RAP_016	-8.74864e-06	3.53453	3.3159	34.2066	2.60864	2.62731	0.786704	1.35555e-05	1.06593	1.78062e-05	10.3159	0.000150299	0.00852761	0.0344617	0.0299333	0.0104294
	Grain 17	RAP_017	8.99902e-06	3.56923	3.3485	34.5422	2.63422	2.65413	0.786685	2.21964e-05	1.06592	2.12434e-05	10.3157	0.000199398
2022-02-17	Grain 1	RAP_001	1.17717e-05	3.86276	3.62278	37.3638	2.84866	2.86828	0.78632	1.7144e-05	1.06624	2.54486e-05	10.3136	0.000185951
	Grain 2	RAP_002	-5.18809e-06	3.79305	3.55755	36.6926	2.79757	2.81414	0.786377	1.87714e-05	1.0662	2.56779e-05	10.314	0.000192779	-0.0669792	0.0477382	0.0511914	-0.0311655
	Grain 3	RAP_003	7.64124e-06	3.62902	3.4042	35.1146	2.67754	2.69425	0.78654	1.70783e-05	1.06604	2.27522e-05	10.3151	0.000175056	0.0695041	0.0434296	-0.0457767	0.0414811
	Grain 4	RAP_004	1.33395e-06	3.58811	3.36599	34.7212	2.64766	2.66398	0.786593	1.54967e-05	1.06599	1.86871e-05	10.3153	0.000141676	0.0464619	0.0394038	-0.0201407	0.0168616
	Grain 5	RAP_005	-5.2338e-06	3.60548	3.38232	34.8893	2.66045	2.67708	0.786573	1.8271e-05	1.06598	2.07117e-05	10.3152	0.000161759	-0.0512893	0.0464548	0.000678848	-0.0467273
	Grain 6	RAP_006	1.80746e-05	3.40325	3.19265	32.9355	2.51145	2.52576	0.786635	1.67148e-05	1.06596	2.18526e-05	10.316	0.000191811	0.112551	0.0425019	-0.0278964	0.0999683
	Grain 7	RAP_007	1.00035e-05	3.42956	3.2172	33.1847	2.53038	2.54874	0.786519	1.50766e-05	1.06601	2.20478e-05	10.3148	0.000157196	-0.0551098	0.0383354	-0.0225127	-0.06009
	Grain 8	RAP_008	-1.50958e-05	3.56252	3.34163	34.4682	2.62816	2.64621	0.786489	1.76413e-05	1.0661	2.02892e-05	10.3148	0.000168983	-0.00818568	0.0448606	0.0351716	0.00774352
	Grain 9	RAP_009	-3.41822e-06	3.59271	3.36989	34.7592	2.65032	2.66566	0.786473	1.76575e-05	1.06612	2.01528e-05	10.3146	0.000157647	-0.0399901	0.0449013	0.049963	-0.017612
	Grain 10	RAP_010	4.70215e-06	3.11659	2.92354	30.1559	2.29942	2.31796	0.786519	1.68287e-05	1.06603	2.1798e-05	10.3149	0.000143773	0.0822388	0.0427963	-0.0618397	0.0369651
	Grain 11	RAP_011	5.41606e-06	3.45219	3.23822	33.4	2.54665	2.56186	0.786436	1.80404e-05	1.06608	2.02019e-05	10.3143	0.000176946	-0.0559155	0.0458762	0.0293955	-0.041065
	Grain 12	RAP_012	1.31687e-05	3.24476	3.0437	31.3946	2.39369	2.40971	0.786441	1.585e-05	1.06606	2.0379e-05	10.3146	0.000171807	0.0142925	0.0403087	-0.0104523	0.0344008
	Grain 13	RAP_013	2.21369e-05	3.26416	3.06189	31.581	2.40795	2.42432	0.786424	1.66486e-05	1.06606	2.12794e-05	10.3142	0.000163163	0.0160369	0.0423408	-0.0429463	-0.0198098
	Grain 14	RAP_014	-2.64617e-06	3.61791	3.39341	35.0004	2.66852	2.68556	0.786381	1.59612e-05	1.06615	2.34147e-05	10.3142	0.000181568	-0.0589486	0.0405918	0.0766785	-0.0136473
	Grain 15	RAP_015	-1.88907e-05	3.53438	3.31528	34.1954	2.60724	2.62535	0.786431	1.48793e-05	1.06609	2.42421e-05	10.3145	0.000157317	0.0313982	0.0378412	-0.022067	0.0191766
	Grain 16	RAP_016	2.55561e-06	3.5727	3.3513	34.5665	2.63557	2.65283	0.786432	1.63438e-05	1.06607	2.02535e-05	10.3144	0.000168263	-0.0281244	0.0415632	-0.0018895	-0.0262762
	Grain 17	RAP_017	2.41959e-05	3.43992	3.22679	33.2837	2.5378	2.55458	0.786477	1.57396e-05	1.06605	2.08872e-05	10.3148	0.000154001

## Sheet: RKV01
Time	Grain	Sample	44Ca	46Ti	47Ti	48Ti	49Ti	50Ti	49Ti/47Ti	se	46Ti/47Ti	se	48Ti/47Ti	se	δ49/47Ti	2se	δ46/47Ti	δ48/47Ti
2022-02-15	Grain 1	RKV01_001	3.70599e-06	3.58391	3.36286	34.6808	2.64453	2.67473	0.786395	1.65691e-05	1.06573	2.2468e-05	10.3129	0.000162953
	Grain 2	RKV01_002	3.05412e-06	3.52855	3.31086	34.1446	2.60363	2.63349	0.786389	1.85993e-05	1.06575	2.21581e-05	10.3129	0.000173456	-0.0051784	0.0473027	-0.00721723	-0.00214359
	Grain 3	RKV01_003	7.18028e-06	3.39962	3.1898	32.8963	2.50844	2.5381	0.786392	1.69935e-05	1.06578	2.27319e-05	10.3129	0.000189124	-0.0655815	0.0432161	0.0233224	-0.0309603
	Grain 4	RKV01_004	1.74056e-05	3.4942	3.2786	33.8142	2.57861	2.58498	0.786497	1.68918e-05	1.06576	2.22792e-05	10.3136	0.000173122	0.12324	0.0429597	-0.0360827	0.0572506
	Grain 5	RKV01_005	5.76736e-07	3.63493	3.41046	35.1725	2.68202	2.70799	0.786409	1.93247e-05	1.06581	2.74992e-05	10.3131	0.000191054	-0.0327111	0.0491452	0.00169734	-0.0189851
	Grain 6	RKV01_006	1.49711e-05	3.61176	3.38855	34.9462	2.66466	2.6904	0.786372	1.785e-05	1.06587	2.34043e-05	10.313	0.00017831	-0.00580301	0.0453981	0.0272911	0.00733937
	Grain 7	RKV01_007	-7.84759e-06	3.60865	3.38565	34.9154	2.66229	2.68763	0.786345	1.75456e-05	1.06586	2.47152e-05	10.3127	0.000178014	-4.76945e-05	0.0446258	0.00241887	-0.00170916
	Grain 8	RKV01_008	5.52514e-06	3.5889	3.36716	34.7239	2.64766	2.67259	0.786317	1.93978e-05	1.06585	2.31532e-05	10.3125	0.000184843	-0.0837407	0.0493342	0.0213237	-0.0383995
	Grain 9	RKV01_009	1.10456e-05	3.38322	3.17435	32.7374	2.49638	2.51878	0.786421	1.63849e-05	1.0658	2.32243e-05	10.3131	0.000165023	0.043352	0.0416712	-0.0300198	0.000472265
	Grain 10	RKV01_010	1.60177e-05	3.38834	3.17913	32.7884	2.50025	2.52257	0.786457	1.6225e-05	1.06581	1.98119e-05	10.3136	0.000163098	0.0362548	0.0412624	0.00233715	0.044166
	Grain 11	RKV01_011	-8.12885e-06	3.38243	3.17357	32.73	2.49581	2.518	0.786436	1.80833e-05	1.06581	2.30692e-05	10.3133	0.000186248	-0.00336407	0.0459879	-0.0177586	-0.0120913
	Grain 12	RKV01_012	-6.32419e-06	3.41613	3.20507	33.0545	2.52053	2.54282	0.786421	1.96268e-05	1.06585	2.35127e-05	10.3132	0.000200119	-0.00923949	0.0499139	0.0271058	-0.0107861
	Grain 13	RKV01_013	1.04168e-05	3.42857	3.21679	33.1757	2.52975	2.55058	0.786419	1.7303e-05	1.06583	2.53058e-05	10.3133	0.000179423	0.0140828	0.044005	-0.0151767	0.00713011
	Grain 14	RKV01_014	1.59533e-05	3.42681	3.21509	33.1582	2.52834	2.54936	0.786396	1.93635e-05	1.06585	2.51092e-05	10.3133	0.000171815	-0.0115873	0.0492456	-0.00181694	0.00313754
	Grain 15	RKV01_015	7.4472e-06	3.42856	3.21667	33.1741	2.52956	2.55004	0.786391	1.83691e-05	1.06587	2.52586e-05	10.3132	0.000196899	-0.0117159	0.046717	-0.000400161	-0.00370043
	Grain 16	RKV01_016	-3.3288e-06	3.42265	3.21106	33.1162	2.52519	2.54576	0.786404	2.01306e-05	1.06589	2.45004e-05	10.3132	0.000179935	0.0304186	0.0511982	0.0103699	0.00761433
	Grain 17	RKV01_017	1.03446e-05	3.37568	3.16701	32.6613	2.49044	2.51111	0.78637	1.7913e-05	1.06589	2.34806e-05	10.313	0.000171221	-0.0300173	0.0455573	0.00663389	-0.00866215
	Grain 18	RKV01_018	-9.05653e-06	3.37496	3.16637	32.6548	2.48998	2.51029	0.786382	1.87677e-05	1.06587	2.22322e-05	10.313	0.000140747	0.179785	0.0477404	-0.124669	0.0646264
	Grain 19	RKV01_019	-4.92384e-06	3.6415	3.41564	35.2209	2.68507	2.69866	0.786112	1.73733e-05	1.06612	2.4203e-05	10.3117	0.000171268
2022-02-15	Grain 1	RKV01_001	8.31329e-06	3.46175	3.24765	33.4932	2.55379	2.56844	0.786351	1.60207e-05	1.06592	2.13573e-05	10.3131	0.000155801
	Grain 2	RKV01_002	7.29392e-06	3.45617	3.24231	33.437	2.54948	2.5637	0.786314	1.6458e-05	1.06596	2.21461e-05	10.3127	0.00016512	0.105793	0.0418656	-0.0565362	0.0589627
	Grain 3	RKV01_003	1.19393e-05	3.40619	3.19497	32.9437	2.5116	2.5241	0.786112	1.72734e-05	1.06611	2.47117e-05	10.3111	0.000251007	-0.172138	0.0439388	0.076286	-0.115513
	Grain 4	RKV01_004	-2.29551e-06	3.73238	3.50096	36.1017	2.75239	2.76511	0.78618	1.74817e-05	1.0661	2.62443e-05	10.3119	0.000189405	0.0358129	0.0444741	0.0081773	0.0801212
	Grain 5	RKV01_005	-2.71445e-05	3.54029	3.32086	34.2417	2.61083	2.63226	0.786192	2.6803e-05	1.06607	3.43824e-05	10.3111	0.000491129	-0.00403867	0.068184	0.0156242	-0.00961095
	Grain 6	RKV01_006	1.55386e-05	3.5075	3.29029	33.9244	2.58686	2.60773	0.78621	2.09644e-05	1.06601	2.79824e-05	10.3104	0.000835345	0.024257	0.0533316	-0.0445535	-0.0750694
	Grain 7	RKV01_007	-1.45104e-05	3.54911	3.32922	34.3288	2.6174	2.6382	0.78619	2.46202e-05	1.06605	2.68379e-05	10.3113	0.00043587	-0.130897	0.0626235	0.0841615	-0.0324361
	Grain 8	RKV01_008	-7.0295e-06	3.57159	3.35076	34.5561	2.63496	2.65601	0.786375	1.87154e-05	1.0659	2.59034e-05	10.3129	0.00021745	0.335759	0.0476151	-0.188428	0.197227
	Grain 9	RKV01_009	1.15896e-05	3.51847	3.30013	34.0257	2.59401	2.6141	0.786033	2.20739e-05	1.06616	3.10543e-05	10.3104	0.000327794	-0.21872	0.0561531	0.0914744	-0.11296
	Grain 10	RKV01_010	-4.70008e-07	3.56072	3.33956	34.4317	2.62501	2.6449	0.786035	1.81126e-05	1.06622	2.95082e-05	10.3102	0.000369996	-0.12473	0.0460804	0.118491	-0.102139
	Grain 11	RKV01_011	8.10752e-06	3.48017	3.2646	33.6652	2.56674	2.58661	0.786233	1.63435e-05	1.06603	2.07533e-05	10.3122	0.000182454	0.143323	0.04158	-0.103124	0.0984308
	Grain 12	RKV01_012	2.57686e-05	3.46348	3.24885	33.5025	2.55427	2.57368	0.786206	1.70438e-05	1.06606	2.67684e-05	10.3121	0.000186986	-0.02818	0.0433558	0.0169032	-0.0177123
	Grain 13	RKV01_013	-1.12683e-05	3.4715	3.25639	33.5812	2.56025	2.57911	0.786223	1.76372e-05	1.06605	2.47485e-05	10.3124	0.000196326	0.0276514	0.044867	0.00804984	0.0336855
	Grain 14	RKV01_014	-8.76048e-06	3.51419	3.29651	33.9935	2.5917	2.61095	0.786196	1.67857e-05	1.06603	2.42973e-05	10.3119	0.000175327	-0.0102269	0.0427006	-0.0296797	-0.0248178
	Grain 15	RKV01_015	7.29523e-06	3.53104	3.3122	34.1556	2.604	2.62329	0.786185	1.77289e-05	1.06607	2.40279e-05	10.312	0.000188699	-0.0446666	0.0450991	0.0792701	-0.00376767
	Grain 16	RKV01_016	7.81052e-06	3.32565	3.11992	32.1733	2.45302	2.47058	0.786245	2.04264e-05	1.06594	2.09865e-05	10.3122	0.000178177	0.00873651	0.0519597	-0.0999505	-0.0213789
	Grain 17	RKV01_017	-1.03805e-05	3.40413	3.19329	32.9318	2.51086	2.52857	0.786291	1.81971e-05	1.06602	2.34135e-05	10.3128	0.000181164	0.206695	0.0462954	-0.0162127	0.129411
	Grain 18	RKV01_018	-1.14728e-05	3.41242	3.20071	33.0018	2.5158	2.5276	0.786012	1.42928e-05	1.06614	2.28913e-05	10.3108	0.000154379	-0.31978	0.0363564	0.122256	-0.169052
	Grain 19	RKV01_019	-1.69388e-05	3.17622	2.97956	30.7258	2.34264	2.35945	0.786236	1.66863e-05	1.066	2.22251e-05	10.3122	0.000170254
2022-02-15	Grain 1	RKV01_001	5.03922e-06	3.43041	3.21809	33.1906	2.53074	2.53903	0.78641	1.64152e-05	1.06598	2.29393e-05	10.3137	0.000149568
	Grain 2	RKV01_002	-3.50474e-05	3.42014	3.20846	33.0902	2.52312	2.53106	0.786397	1.46606e-05	1.06598	2.20498e-05	10.3134	0.000168249	0.00750417	0.0372858	0.00716379	-0.0091
	Grain 3	RKV01_003	-3.70126e-05	3.42012	3.20849	33.09	2.52306	2.53075	0.786371	1.70249e-05	1.06596	2.1949e-05	10.3133	0.000167395	-0.0343874	0.0432985	-0.0150848	-0.0141636
	Grain 4	RKV01_004	1.56871e-05	3.42578	3.21375	33.1448	2.52729	2.53557	0.786399	1.7291e-05	1.06597	2.05468e-05	10.3134	0.000161752	0.0182512	0.043976	0.0051866	-0.00506702
	Grain 5	RKV01_005	2.20529e-05	3.40132	3.19079	32.9088	2.50924	2.51737	0.786399	1.66599e-05	1.06598	2.42676e-05	10.3137	0.0001689	0.00314295	0.0423701	0.0108508	0.0206074
	Grain 6	RKV01_006	2.13151e-06	3.38413	3.17472	32.7425	2.49658	2.50468	0.786394	1.8492e-05	1.06596	1.9437e-05	10.3135	0.000159832	0.0563783	0.0470325	-0.0250669	0.0267622
	Grain 7	RKV01_007	-2.68607e-06	3.27166	3.06911	31.6511	2.41324	2.43046	0.7863	1.56217e-05	1.066	1.97105e-05	10.3128	0.000133021	-0.0279355	0.0397336	0.0124581	-0.0232247
	Grain 8	RKV01_008	4.00684e-06	3.29768	3.09349	31.9018	2.43226	2.44911	0.78625	1.68451e-05	1.06601	2.02601e-05	10.3125	0.000160516	-0.118648	0.042844	0.0560269	-0.0415781
	Grain 9	RKV01_009	1.37344e-05	3.3951	3.18521	32.8496	2.50481	2.5257	0.786387	1.63101e-05	1.06589	2.18645e-05	10.3132	0.000160727	0.0767669	0.0414843	-0.0877178	0.0137375
	Grain 10	RKV01_010	-2.36302e-05	3.3806	3.17137	32.708	2.49398	2.5149	0.786403	1.53534e-05	1.06597	2.18509e-05	10.3135	0.000171512	0.00161916	0.0390473	0.0557656	0.00593281
	Grain 11	RKV01_011	1.48393e-05	3.37749	3.16859	32.6799	2.49183	2.51252	0.786417	1.80881e-05	1.06593	2.21866e-05	10.3137	0.000172408	0.00829908	0.0460017	-0.0112639	0.0140681
	Grain 12	RKV01_012	-1.60374e-06	3.36448	3.15644	32.5543	2.48228	2.50318	0.786417	1.98093e-05	1.06591	2.26235e-05	10.3136	0.000169061	0.350674	0.0503963	-0.221709	0.177597
	Grain 13	RKV01_013	-2.46564e-06	3.53817	3.31797	34.2079	2.60748	2.60949	0.785866	1.78151e-05	1.06636	2.69109e-05	10.3099	0.000181927	-0.3284	0.0453238	0.229114	-0.174196
	Grain 14	RKV01_014	-6.40042e-06	3.44903	3.23448	33.3467	2.54176	2.544	0.785831	1.73991e-05	1.06633	2.88371e-05	10.3097	0.000217768	-0.0308551	0.0442808	-0.0158991	-0.0159555
	Grain 15	RKV01_015	-1.02862e-05	3.58292	3.36004	34.6418	2.64048	2.6425	0.785845	2.16603e-05	1.06633	2.78514e-05	10.3099	0.00021382	-0.161661	0.0551172	0.0821387	-0.0857267
	Grain 16	RKV01_016	-2.81727e-05	3.47504	3.25941	33.6107	2.56227	2.58063	0.786113	2.40072e-05	1.06615	2.35351e-05	10.3119	0.000230204	0.187694	0.0610898	-0.0961599	0.108159
	Grain 17	RKV01_017	9.06588e-06	3.38184	3.17191	32.7074	2.49339	2.49655	0.786086	1.78938e-05	1.06618	2.23948e-05	10.3116	0.000187542	-0.0217242	0.0455254	0.0202853	-0.0077089
	Grain 18	RKV01_018	1.65588e-05	3.35442	3.14624	32.4423	2.47324	2.47646	0.786093	1.75072e-05	1.06617	2.14665e-05	10.3114	0.00016465	-0.0318854	0.0445408	0.00146688	-0.0186692
	Grain 19	RKV01_019	-1.10366e-05	3.34292	3.13549	32.3323	2.46497	2.46807	0.786151	1.82146e-05	1.06615	2.00053e-05	10.3117	0.000173544
2022-02-16	Grain 1	RKV01_001	-2.95985e-05	3.0741	2.88482	29.7512	2.2689	2.28069	0.786496	1.69783e-05	1.06561	2.24791e-05	10.313	0.000171764
	Grain 2	RKV01_002	-1.92945e-06	3.08157	2.89165	29.8218	2.27421	2.28527	0.786473	1.77014e-05	1.06568	2.30489e-05	10.3131	0.000173809	0.000788091	0.0450146	-0.0507702	-0.0119955
	Grain 3	RKV01_003	2.36185e-06	3.45413	3.24073	33.4228	2.54866	2.57742	0.786448	1.82081e-05	1.06585	2.17421e-05	10.3134	0.0001673	-0.0414991	0.0463027	0.152839	0.00612751
	Grain 4	RKV01_004	6.71663e-06	3.31738	3.11288	32.1048	2.44825	2.47061	0.786489	1.43526e-05	1.06569	1.9308e-05	10.3135	0.000162159	0.212355	0.0365056	-0.177194	0.117355
	Grain 5	RKV01_005	1.00193e-06	3.39218	3.1824	32.8147	2.502	2.52798	0.786195	1.889e-05	1.06592	2.42082e-05	10.3113	0.000205757	-0.212107	0.0480439	0.0985043	-0.1391
	Grain 6	RKV01_006	-1.17123e-05	3.41781	3.20641	33.0641	2.52099	2.54758	0.786236	1.60795e-05	1.06593	2.33665e-05	10.3119	0.000175237	0.0990649	0.0409065	0.0617895	0.102087
	Grain 7	RKV01_007	-1.96761e-05	2.57071	2.41197	24.8684	1.89611	1.91841	0.78612	2.05044e-05	1.06581	2.64302e-05	10.3104	0.000199073	-0.15658	0.0521579	-0.11208	-0.140314
	Grain 8	RKV01_008	7.26436e-06	3.30453	3.10012	31.9678	2.43748	2.46248	0.786251	1.96652e-05	1.06593	2.66769e-05	10.3118	0.000184815	0.0642864	0.0500259	0.0549384	0.0561075
	Grain 9	RKV01_009	-2.53719e-06	3.29566	3.09179	31.8827	2.43102	2.45117	0.78628	1.94439e-05	1.06594	2.5883e-05	10.312	0.000209473	-0.0690101	0.0494545	0.0598065	-0.0308661
	Grain 10	RKV01_010	1.0352e-06	3.14383	2.9497	30.42	2.3197	2.32829	0.786418	1.74639e-05	1.06581	2.59666e-05	10.3129	0.000170853	0.198886	0.0444225	-0.103521	0.0906708
	Grain 11	RKV01_011	1.16248e-06	3.10768	2.91552	30.0646	2.29231	2.30027	0.786244	1.80919e-05	1.06591	2.42971e-05	10.3119	0.000184324	-0.22369	0.0460107	0.0936602	-0.106521
	Grain 12	RKV01_012	1.99337e-05	3.06078	2.8718	29.6172	2.25844	2.27878	0.786421	1.49791e-05	1.06581	1.83406e-05	10.3131	0.000144848	0.157576	0.0381003	-0.0770902	0.0745582
	Grain 13	RKV01_013	5.05464e-06	3.22642	3.02704	31.2172	2.38031	2.3997	0.78635	1.85882e-05	1.06587	2.347e-05	10.3128	0.000172976	-0.0494864	0.0472747	0.021077	-0.0218468
	Grain 14	RKV01_014	2.15334e-05	3.21547	3.01671	31.1111	2.37222	2.39417	0.786358	1.83046e-05	1.06588	1.86582e-05	10.3129	0.000170009	0.0877894	0.0465594	-0.0419132	0.0611767
	Grain 15	RKV01_015	-1.5681e-05	3.39745	3.18713	32.865	2.50581	2.51783	0.786227	1.54212e-05	1.06599	2.04469e-05	10.3118	0.000154476	-0.0285539	0.0392272	0.0262068	-0.0393928
	Grain 16	RKV01_016	3.86528e-06	3.32727	3.12115	32.1836	2.45366	2.45704	0.786141	1.89795e-05	1.06604	2.21188e-05	10.3114	0.000169287	-0.147779	0.048278	0.0552217	-0.0640556
	Grain 17	RKV01_017	9.75287e-08	3.33961	3.13293	32.3081	2.46339	2.48821	0.786287	1.59255e-05	1.06597	2.12801e-05	10.3124	0.000157349	0.0317885	0.0405094	0.0138788	0.0206807
	Grain 18	RKV01_018	9.37443e-06	3.20312	3.00515	30.9921	2.36321	2.38319	0.786384	1.88704e-05	1.06587	2.36993e-05	10.313	0.000180786	0.0660106	0.0479959	-0.0667059	0.0133912
	Grain 19	RKV01_019	2.07202e-06	3.22193	3.02268	31.1738	2.37697	2.39731	0.786377	1.80133e-05	1.06592	2.2254e-05	10.3133	0.000177514
2022-02-16	Grain 1	RKV01_001	4.67023e-06	3.50279	3.28598	33.8885	2.58391	2.59596	0.786345	1.64233e-05	1.06598	2.23969e-05	10.3131	0.000174577
	Grain 2	RKV01_002	-3.21986e-06	3.55269	3.33269	34.3701	2.62056	2.63276	0.786319	1.62241e-05	1.06601	2.13534e-05	10.313	0.000152376	0.049639	0.041268	-0.00338124	0.0387735
	Grain 3	RKV01_003	-7.74701e-06	3.45303	3.23907	33.4019	2.54661	2.56233	0.786215	1.9324e-05	1.06605	2.56666e-05	10.3122	0.000203575	-0.122179	0.0491511	0.0360338	-0.0744299
	Grain 4	RKV01_004	1.26368e-05	3.51841	3.30052	34.0379	2.59521	2.612	0.786304	1.49582e-05	1.06602	2.20404e-05	10.3129	0.000157003	0.108853	0.0380511	-0.0634774	0.0591813
	Grain 5	RKV01_005	1.35684e-05	3.85539	3.61629	37.2925	2.8432	2.86295	0.786221	1.55467e-05	1.06612	1.74993e-05	10.3123	0.000153203	-0.0756162	0.0395449	0.0762846	-0.0305427
	Grain 6	RKV01_006	1.07158e-05	3.59829	3.37534	34.808	2.65388	2.65709	0.786257	1.85434e-05	1.06605	2.06225e-05	10.3124	0.000172767	0.0304147	0.0471703	-0.0384385	0.010174
	Grain 7	RKV01_007	4.6371e-06	3.61149	3.38766	34.9347	2.66353	2.68101	0.786245	1.50977e-05	1.06607	2.24016e-05	10.3123	0.000159178	-0.0152549	0.0384039	0.000760193	-0.0103033
	Grain 8	RKV01_008	-1.95094e-05	3.62071	3.39626	35.0237	2.67033	2.68634	0.786257	1.70966e-05	1.06609	2.32242e-05	10.3124	0.000191746	-0.101838	0.0434841	0.0735955	-0.0557712
	Grain 9	RKV01_009	6.97021e-07	3.55277	3.33297	34.3752	2.62114	2.63	0.786429	1.67573e-05	1.06595	2.1587e-05	10.3137	0.000173072	0.176496	0.0426236	-0.0901918	0.0943177
	Grain 10	RKV01_010	4.8151e-06	3.50211	3.28529	33.8812	2.5833	2.59364	0.786324	1.78183e-05	1.066	2.11557e-05	10.313	0.000172862	-0.0839498	0.0453167	0.0346419	-0.0369303
	Grain 11	RKV01_011	-1.73898e-05	3.41691	3.20543	33.0579	2.52059	2.53815	0.786351	1.75428e-05	1.06598	2.00744e-05	10.3131	0.000159184	0.136416	0.0446245	-0.112594	0.0578598
	Grain 12	RKV01_012	-3.71795e-06	3.76077	3.52728	36.3732	2.77302	2.78103	0.786163	1.72938e-05	1.06619	2.25682e-05	10.312	0.000180627	-0.103729	0.043991	0.1226	-0.0429292
	Grain 13	RKV01_013	7.20364e-06	3.73627	3.50444	36.1369	2.75498	2.76279	0.786138	1.56299e-05	1.06615	2.21117e-05	10.3117	0.000162186	-0.134237	0.0397583	0.0423305	-0.0683876
	Grain 14	RKV01_014	-2.19607e-06	3.45154	3.23779	33.3911	2.54596	2.5636	0.786325	1.77087e-05	1.06602	2.27928e-05	10.3129	0.000158643	0.311294	0.0450558	-0.134886	0.156369
	Grain 15	RKV01_015	-9.08255e-06	3.42939	3.21654	33.1654	2.52828	2.54616	0.786022	2.01513e-05	1.06617	2.49083e-05	10.3109	0.000207062	-0.322001	0.0512576	0.106153	-0.165919
	Grain 16	RKV01_016	1.09536e-05	3.41466	3.20295	33.0296	2.51824	2.54106	0.786225	1.84694e-05	1.0661	2.38205e-05	10.3122	0.000191258	0.157869	0.0469899	-0.0334263	0.0729093
	Grain 17	RKV01_017	2.42582e-05	3.39723	3.1866	32.8606	2.50524	2.52848	0.78618	1.78015e-05	1.0661	2.53985e-05	10.3121	0.000173446	-0.0374972	0.0452844	0.00514748	-0.00516835
	Grain 18	RKV01_018	1.81424e-06	3.4253	3.21296	33.1323	2.52601	2.54985	0.786195	1.76138e-05	1.06609	2.27248e-05	10.3121	0.000183658	-0.0137765	0.0448071	-0.00221734	-0.0156406
	Grain 19	RKV01_019	1.07991e-05	3.49271	3.27622	33.7857	2.57587	2.59921	0.78623	1.82277e-05	1.06608	2.31205e-05	10.3124	0.000191363

## Sheet: R632
Time	Grain	Sample	44Ca	46Ti	47Ti	48Ti	49Ti	50Ti	49Ti/47Ti	se	46Ti/47Ti	se	48Ti/47Ti	se	δ49/47Ti	2se	δ46/47Ti	δ48/47Ti
2021-08-26	Grain 1	R632_001	0.000234806	4.0865	3.83671	39.6227	3.02439	3.01782	0.788277	1.62556e-05	1.06511	2.13867e-05	10.3272	0.000182743
	Grain 2	R632_002	0.000292386	4.36444	4.09739	42.3116	3.22926	3.22234	0.788126	1.51645e-05	1.06518	2.07723e-05	10.3265	0.000133295	-0.0481791	0.0384806	0.0217113	0.0147951
	Grain 3	R632_003	0.000266906	4.20596	3.94851	40.7701	3.11163	3.10505	0.788051	1.54014e-05	1.0652	1.98571e-05	10.3254	0.000219681	-0.00973836	0.039087	-0.0183003	-0.0543667
	Grain 4	R632_004	0.000289377	4.43135	4.15986	42.9526	3.27793	3.2712	0.787991	1.54789e-05	1.06527	1.89343e-05	10.3255	0.000132427	-0.0789365	0.0392839	0.0521329	-0.0220433
	Grain 5	R632_005	0.000273456	4.1711	3.91572	40.4338	3.08581	3.07898	0.788056	1.2368e-05	1.06522	1.86428e-05	10.326	0.00013017	0.104675	0.0313919	-0.0764177	0.0790459
	Grain 6	R632_006	0.000259877	4.21648	3.95791	40.8649	3.11865	3.11113	0.787956	1.68979e-05	1.06533	2.12647e-05	10.3249	0.000131974	-0.0874665	0.0428867	0.0814761	-0.0447114
	Grain 7	R632_007	0.000247235	4.20239	3.94489	40.7301	3.10855	3.10241	0.787993	1.55086e-05	1.06528	2.2302e-05	10.3247	0.000619543	-0.0412618	0.0393606	-0.0124721	-0.087456
	Grain 8	R632_008	0.000264164	4.10252	3.85125	39.7693	3.03515	3.02872	0.788096	1.58132e-05	1.06524	2.33021e-05	10.3263	0.000129945	0.0659778	0.0401328	0.00291189	0.0923678
	Grain 9	R632_009	0.00024921	4.03466	3.78768	39.1117	2.98505	2.97857	0.788095	1.53553e-05	1.06521	1.95433e-05	10.326	0.000126028	-0.0369874	0.0389667	0.00860365	-0.0386331
	Grain 10	R632_010	0.000272013	3.96849	3.72576	38.4742	2.93646	2.93021	0.788152	1.65194e-05	1.06515	1.9196e-05	10.3265	0.000159537	0.0370788	0.0419208	-0.037262	0.0372229
	Grain 11	R632_011	0.000229225	3.99302	3.74872	38.7104	2.95456	2.94889	0.78815	1.66135e-05	1.06517	1.93439e-05	10.3263	0.000143362	0.0360139	0.0421596	-0.0196373	-0.00411169
	Grain 12	R632_012	0.000578558	3.99377	3.74918	38.7144	2.9547	2.94846	0.788092	1.60753e-05	1.06524	2.09401e-05	10.3261	0.000152424	-0.0805961	0.0407923	0.0636032	-0.0360914
	Grain 13	R632_013	0.000242764	3.81423	3.58088	36.9785	2.8223	2.81653	0.788161	2.24688e-05	1.06517	2.36681e-05	10.3267	0.00016903	0.0236054	0.057017	-0.0104208	0.0648036
	Grain 14	R632_014	0.000248889	3.89927	3.66088	37.8021	2.88547	2.87972	0.788192	1.61479e-05	1.06512	1.88468e-05	10.3259	0.000707366	-0.0551702	0.0409723	0.00932047	-0.123016
	Grain 15	R632_015	0.000294519	3.82592	3.59224	37.0995	2.8318	2.82596	0.788311	1.74286e-05	1.06505	2.05705e-05	10.3277	0.00014906	0.0416695	0.0442196	-0.00784489	0.0708639
	Grain 16	R632_016	0.000240739	3.86849	3.63239	37.5152	2.86364	2.85819	0.788363	1.76077e-05	1.065	2.03779e-05	10.328	0.000143778	0.0389522	0.0446707	-0.0379864	0.0169667
	Grain 17	R632_017	0.00123643	3.77125	3.54099	36.571	2.79155	2.78647	0.788355	2.06072e-05	1.06503	1.92052e-05	10.3279	0.000155552	-0.118614	0.0522728	0.0784244	-0.0449248
	Grain 18	R632_018	0.000224191	3.75671	3.52779	36.4379	2.78178	2.77628	0.788533	1.92049e-05	1.06489	2.23469e-05	10.3288	0.000158486	0.136192	0.0487172	-0.0517663	0.0558326
	Grain 19	R632_019	0.000221348	4.06422	3.81667	39.4206	3.00944	3.00319	0.788497	1.7428e-05	1.06486	1.8788e-05	10.3285	0.000157333	-0.064126	0.0442028	-0.00456022	-0.0367413
	Grain 20	R632_020	0.000253732	3.92019	3.68146	38.0259	2.90306	2.89701	0.788562	1.67502e-05	1.06485	2.23718e-05	10.329	0.000153279	0.0590487	0.0424854	-0.00420198	0.0189267
	Grain 21	R632_021	0.000214705	3.82721	3.59417	37.1246	2.83412	2.82859	0.788534	1.86618e-05	1.06484	2.35528e-05	10.3291	0.000137159	-0.103411	0.047328	0.0113744	-0.0281113
	Grain 22	R632_022	0.000252196	3.8826	3.64631	37.6657	2.87573	2.8701	0.788668	1.61638e-05	1.0648	1.93017e-05	10.3298	0.000176659	0.116669	0.0409948	-0.0169637	0.0375223
	Grain 23	R632_023	0.000214631	3.74985	3.52162	36.3773	2.77721	2.77223	0.788619	2.03085e-05	1.06481	1.89706e-05	10.3297	0.000162567	-0.0360271	0.0515021	0.00711976	0.00308192
	Grain 24	R632_024	0.00025553	3.85513	3.62053	37.3984	2.85524	2.84993	0.788627	1.93403e-05	1.06479	1.8319e-05	10.3296	0.000129817	-0.00165986	0.0490478	-0.0113399	-0.0119388
	Grain 25	R632_025	0.000194718	3.75168	3.52334	36.3949	2.77864	2.77422	0.788637	1.86487e-05	1.06481	2.2362e-05	10.3296	0.000152732	-0.0650758	0.0472904	0.0499764	-0.0210787
	Grain 26	R632_026	0.000210566	3.6321	3.41134	35.2397	2.6907	2.68669	0.78875	1.95882e-05	1.06471	1.88197e-05	10.3302	0.000168032	0.11518	0.0496747	-0.0954991	0.0479617
	Grain 27	R632_027	0.00019792	3.73766	3.51013	36.2587	2.76838	2.7633	0.788681	1.8465e-05	1.06482	2.24045e-05	10.3297	0.000132282	-0.0330759	0.0468234	0.0713136	-0.0291896
	Grain 28	R632_028	0.00023343	3.85625	3.62166	37.4111	2.85628	2.85086	0.788665	1.81596e-05	1.06478	2.74015e-05	10.3298	0.000168154	-0.109979	0.0460463	0.0169203	-0.0514095
	Grain 29	R632_029	0.000222967	3.60924	3.38991	35.0212	2.67403	2.66981	0.788822	2.19387e-05	1.0647	1.91677e-05	10.331	0.000167745	0.131347	0.0556314	-0.0272085	0.0786619
	Grain 30	R632_030	0.000402555	3.44932	3.23978	33.4688	2.55544	2.55134	0.788771	2.11154e-05	1.06468	2.31726e-05	10.3306	0.000174132	-0.052463	0.0535372	-0.0115285	-0.0363395
	Grain 31	R632_031	0.00020002	3.62177	3.40174	35.143	2.68329	2.6792	0.788804	2.12828e-05	1.06468	1.8967e-05	10.3309	0.000160477	0.0336827	0.0539639	-0.0121571	0.0408795
	Grain 32	R632_032	0.000222315	3.91215	3.67437	37.9577	2.89827	2.89291	0.788783	2.17475e-05	1.06471	1.8949e-05	10.3304	0.000171277	-0.0664595	0.0551382	0.0204917	-0.068977
	Grain 33	R632_033	0.000202373	3.72926	3.50264	36.1868	2.76311	2.75862	0.788867	1.86104e-05	1.0647	2.34579e-05	10.3313	0.000162405	0.0520885	0.047185	0.0277331	0.0641366
	Grain 34	R632_034	0.00020755	3.94133	3.70209	38.2458	2.92046	2.91579	0.788869	2.30135e-05	1.06463	1.87654e-05	10.3309	0.000185402	-0.0709183	0.0583413	-0.00672922	-0.0670107
	Grain 35	R632_035	0.000219494	3.69517	3.47106	35.8625	2.73861	2.73458	0.788983	2.1519e-05	1.06457	2.06793e-05	10.3318	0.000169911
2021-08-26	Grain 1	R632_001	0.00025772	3.88722	3.64869	37.6697	2.87459	2.86772	0.78784	2.06795e-05	1.06538	2.06719e-05	10.3242	0.000154892
	Grain 2	R632_002	0.000228815	3.97314	3.72926	38.5009	2.93787	2.93097	0.78779	1.69312e-05	1.0654	2.16126e-05	10.324	0.000155777	0.00413006	0.0429843	-0.0130382	0.0381755
	Grain 3	R632_003	0.000245516	3.83273	3.59731	37.1352	2.83372	2.82723	0.787733	1.92429e-05	1.06544	1.90586e-05	10.3231	0.000548679	-0.0501313	0.0488538	0.0365649	-0.0808909
	Grain 4	R632_004	0.000281085	3.99202	3.74694	38.6827	2.95166	2.94527	0.787755	2.04872e-05	1.06541	1.94992e-05	10.3238	0.000148463	-0.0106733	0.0520137	0.00133115	0.0208663
	Grain 5	R632_005	0.000217863	3.82431	3.58965	37.06	2.8279	2.82116	0.787794	1.677e-05	1.06537	1.92459e-05	10.3241	0.000169258	0.0894297	0.0425785	-0.0597869	0.067273
	Grain 6	R632_006	0.0002247	3.90067	3.66101	37.7928	2.88375	2.87661	0.787692	1.80133e-05	1.06546	2.06635e-05	10.323	0.000415831	-0.109648	0.0457319	0.046723	-0.0961384
	Grain 7	R632_007	0.000250155	3.88039	3.642	37.5998	2.86902	2.86294	0.787762	1.62065e-05	1.06546	2.11263e-05	10.3239	0.00013424	0.0163514	0.0411464	0.0410593	0.0360115
	Grain 8	R632_008	0.000231012	3.79174	3.55911	36.7446	2.80389	2.79754	0.787807	1.84015e-05	1.06536	2.02615e-05	10.3241	0.000146539	0.044461	0.0467179	-0.0484497	0.00935516
	Grain 9	R632_009	0.000241011	3.799	3.5659	36.8146	2.80915	2.80269	0.787782	1.65225e-05	1.06537	1.92367e-05	10.3241	0.000133546	-0.091765	0.0419429	0.0189517	-0.0354205
	Grain 10	R632_010	0.000233498	3.71668	3.48874	36.0205	2.74879	2.74234	0.787902	1.66566e-05	1.06534	1.93356e-05	10.3248	0.000122312	0.15562	0.0422874	-0.0626723	0.106253
	Grain 11	R632_011	0.000240561	3.8511	3.61458	37.3145	2.84748	2.84133	0.787776	1.90814e-05	1.06544	2.21269e-05	10.3233	0.000477472	-0.139364	0.048437	0.114633	-0.128026
	Grain 12	R632_012	0.000311951	3.60251	3.38171	34.9141	2.66434	2.65829	0.78787	2.0367e-05	1.06529	2.4267e-05	10.3244	0.00016199	0.124068	0.0517077	-0.120257	0.0794638
	Grain 13	R632_013	0.000245465	3.72869	3.49979	36.1315	2.75702	2.75066	0.787769	1.7132e-05	1.06541	2.14341e-05	10.3239	0.000131943	-0.101188	0.0434905	0.0501256	-0.0475771
	Grain 14	R632_014	0.00022469	3.69534	3.46847	35.8099	2.73254	2.72642	0.787827	2.21791e-05	1.06541	2.05621e-05	10.3244	0.000169649	0.0615221	0.0563079	-0.00156456	0.0451857
	Grain 15	R632_015	0.00103116	3.72363	3.49498	36.0821	2.7533	2.74651	0.787788	1.63846e-05	1.06542	2.13097e-05	10.324	0.000137376	-0.111246	0.041592	0.0437504	-0.0672368
	Grain 16	R632_016	0.000211026	3.63238	3.40961	35.2039	2.68651	2.68048	0.787924	1.91442e-05	1.06534	2.26897e-05	10.3249	0.000150803	0.132227	0.0486006	-0.049578	0.0672146
	Grain 17	R632_017	0.000238721	3.64838	3.42456	35.3568	2.69804	2.6921	0.787852	1.77956e-05	1.06536	2.02944e-05	10.3245	0.000154767	-0.100659	0.0451705	0.064879	-0.048991
	Grain 18	R632_018	0.00021197	3.53672	3.3201	34.2802	2.61603	2.61025	0.787939	1.99441e-05	1.06524	2.07361e-05	10.325	0.000152808	0.0701298	0.0506271	-0.0780511	0.0508264
	Grain 19	R632_019	0.000257027	3.87469	3.63721	37.5526	2.86581	2.85871	0.787915	1.84139e-05	1.06529	1.98759e-05	10.3246	0.000142769	-0.0595645	0.0467381	0.0346695	-0.0502049
	Grain 20	R632_020	0.000263854	3.70148	3.47469	35.8766	2.738	2.73138	0.787985	1.5946e-05	1.06527	2.04114e-05	10.3251	0.000147112	0.0952197	0.0404768	-0.0338641	0.024519
	Grain 21	R632_021	0.000233637	3.74566	3.516	36.3033	2.77027	2.76385	0.787904	2.01746e-05	1.06532	2.05409e-05	10.3252	0.000161826	-0.140292	0.0512037	0.046615	-0.0374507
	Grain 22	R632_022	0.000268514	3.73653	3.5076	36.2194	2.76414	2.75779	0.788045	1.88506e-05	1.06526	2.12178e-05	10.326	0.000134436	0.168319	0.0478494	-0.0515332	0.100198
	Grain 23	R632_023	0.000219302	3.66084	3.43637	35.4795	2.70759	2.70145	0.787921	1.69925e-05	1.06532	2.10748e-05	10.3247	0.000240506	-0.0559069	0.0431302	0.0435486	-0.0651197
	Grain 24	R632_024	0.000243303	3.68648	3.46054	35.7294	2.72649	2.72036	0.787885	1.89061e-05	1.06529	2.35912e-05	10.3248	0.000146661	-0.046325	0.0479898	-0.00197237	0.0118155
	Grain 25	R632_025	0.000216953	3.58412	3.36455	34.7379	2.651	2.64573	0.787922	1.88364e-05	1.06526	2.38319e-05	10.3247	0.000150394	-0.0344748	0.0478112	-0.0187681	-0.0589134
	Grain 26	R632_026	0.00021562	3.40419	3.1956	32.9969	2.51816	2.5127	0.788013	1.97981e-05	1.06527	2.25919e-05	10.3258	0.000173931	0.149867	0.0502558	-0.0302658	0.117882
	Grain 27	R632_027	0.0002189	3.5964	3.37581	34.8533	2.6597	2.65366	0.787868	2.11647e-05	1.06534	2.22617e-05	10.3244	0.000175766	-0.123222	0.05372	0.0568906	-0.0707194
	Grain 28	R632_028	0.000211756	3.7215	3.49339	36.0675	2.7525	2.74581	0.787917	1.99247e-05	1.0653	2.20849e-05	10.3245	0.000161978	-0.0282162	0.0505742	0.0175391	-0.0498905
	Grain 29	R632_029	0.000227235	3.55542	3.33776	34.4644	2.63018	2.62488	0.788011	2.1439e-05	1.06521	2.52488e-05	10.3256	0.0001557	0.0490284	0.0544155	-0.0343104	0.0441015
	Grain 30	R632_030	0.000202904	3.31568	3.11272	32.1413	2.45289	2.44784	0.788027	2.03742e-05	1.0652	2.26479e-05	10.3258	0.000181538	0.0749572	0.0517133	-0.0433816	0.0450541
	Grain 31	R632_031	0.000213372	3.55984	3.34168	34.5032	2.63299	2.62762	0.787926	2.09484e-05	1.06528	2.22426e-05	10.3251	0.000157633	-0.0571854	0.0531704	0.0185673	-0.0232704
	Grain 32	R632_032	0.000214006	3.74423	3.51464	36.2882	2.76923	2.76265	0.787914	2.37564e-05	1.06533	2.23147e-05	10.3249	0.000173357	-0.0351499	0.0602998	0.025944	-0.0237222
	Grain 33	R632_033	0.000229424	3.7583	3.52789	36.426	2.77983	2.77383	0.787958	1.70958e-05	1.06531	1.94357e-05	10.3251	0.00013746	-0.0456142	0.0433906	0.025593	0.0409554
	Grain 34	R632_034	0.00021664	3.86871	3.63177	37.4966	2.8621	2.85605	0.788074	2.25639e-05	1.06524	2.23469e-05	10.3245	0.000826563	0.0786038	0.0572679	-0.0245617	-0.0859732
	Grain 35	R632_035	0.000198093	3.61867	3.39708	35.0773	2.67711	2.67164	0.788065	2.14965e-05	1.06523	1.98475e-05	10.3257	0.000180491
2021-08-26	Grain 1	R632_001	0.000222127	3.48213	3.26951	33.7637	2.57719	2.572	0.788251	2.08571e-05	1.06503	2.05612e-05	10.3268	0.000182675
	Grain 2	R632_002	0.000173284	3.3174	3.1149	32.1687	2.45555	2.45062	0.788327	2.31446e-05	1.06501	2.15426e-05	10.3274	0.000178269	0.125745	0.0587256	-0.0456481	0.0677043
	Grain 3	R632_003	0.000204616	3.55538	3.33813	34.4711	2.63114	2.62571	0.788206	1.63707e-05	1.06508	1.73921e-05	10.3265	0.000142731	-0.0378923	0.0415376	0.0213372	-0.0431618
	Grain 4	R632_004	0.00020325	3.5922	3.3726	34.8271	2.65809	2.65263	0.788144	2.19838e-05	1.06511	2.13385e-05	10.3265	0.000171332	0.00663858	0.0557867	-0.0335232	0.0258062
	Grain 5	R632_005	0.000222631	3.58959	3.36983	34.7967	2.65567	2.65005	0.788071	1.98433e-05	1.06521	2.10815e-05	10.3259	0.000145697	-0.0889668	0.0503548	0.0856727	-0.0394199
	Grain 6	R632_006	0.000193076	3.53086	3.31494	34.2309	2.61263	2.60725	0.788139	1.72737e-05	1.06513	2.00873e-05	10.3262	0.000145979	0.0976738	0.0438386	-0.0703376	0.0378193
	Grain 7	R632_007	0.000216726	3.68569	3.46007	35.7278	2.72671	2.72095	0.788053	2.24389e-05	1.0652	2.54225e-05	10.3257	0.000176153	0.0360639	0.0569498	-0.00351396	0.0039937
	Grain 8	R632_008	0.000221316	3.63888	3.41589	35.2696	2.69141	2.68525	0.78791	1.8057e-05	1.06528	1.96819e-05	10.3252	0.000127511	-0.113713	0.0458301	0.011457	-0.0224879
	Grain 9	R632_009	0.00020602	3.68948	3.46321	35.7578	2.72882	2.72247	0.787946	1.79993e-05	1.06533	2.01527e-05	10.3251	0.000147627	0.00356159	0.0456867	0.037921	-0.00936803
	Grain 10	R632_010	0.000212277	3.67612	3.45077	35.6296	2.71911	2.71264	0.787976	2.14148e-05	1.0653	1.90693e-05	10.3251	0.000166885	0.0367926	0.0543559	-0.0187571	0.00467282
	Grain 11	R632_011	0.000253937	3.60181	3.38099	34.9091	2.66404	2.65786	0.787949	1.48086e-05	1.06532	2.06577e-05	10.3251	0.000154503	-0.00882064	0.0375875	0.0253748	-0.00534096
	Grain 12	R632_012	0.000262327	3.71381	3.48625	35.9962	2.74693	2.7405	0.787935	1.96147e-05	1.06527	2.26834e-05	10.3252	0.000178759	0.0212743	0.0497886	-0.0468363	0.0187256
	Grain 13	R632_013	0.000237925	3.68996	3.46367	35.7621	2.72898	2.72254	0.787888	2.03495e-05	1.06533	2.27151e-05	10.3249	0.00014625	-0.143267	0.0516484	0.0924129	-0.0598283
	Grain 14	R632_014	0.000221942	3.57833	3.35933	34.688	2.64738	2.64145	0.788067	1.93711e-05	1.06519	1.98446e-05	10.3259	0.000172582	0.126485	0.0491673	-0.072849	0.0422032
	Grain 15	R632_015	0.00032755	3.6153	3.394	35.0462	2.67463	2.66863	0.788046	1.59427e-05	1.06521	2.05312e-05	10.3259	0.000145886	0.0398809	0.040463	-0.0139403	0.0518465
	Grain 16	R632_016	0.000208583	3.85342	3.61738	37.3492	2.85035	2.84395	0.787963	1.87366e-05	1.06525	1.88619e-05	10.3249	0.000147821	-0.0697216	0.0475538	0.020278	-0.0673128
	Grain 17	R632_017	0.000233817	3.76706	3.53629	36.5133	2.78654	2.78041	0.787989	1.86256e-05	1.06525	2.11208e-05	10.3253	0.000138206	-0.0502306	0.0472714	0.0276254	-0.00580472
	Grain 18	R632_018	0.000261777	3.8044	3.57155	36.8793	2.81472	2.80868	0.788095	1.96801e-05	1.0652	2.15041e-05	10.3258	0.000133051	0.148966	0.0499509	-0.068486	0.0649777
	Grain 19	R632_019	0.000230371	3.78812	3.55597	36.7153	2.80196	2.79577	0.787966	1.97852e-05	1.06528	1.92117e-05	10.325	0.000147397	-0.108856	0.050213	0.0848863	-0.0425912
	Grain 20	R632_020	0.000211829	3.76397	3.5336	36.4845	2.78449	2.77837	0.788008	1.94445e-05	1.06519	2.04001e-05	10.3251	0.000158681	0.0531208	0.0493536	-0.098699	-0.00122273
	Grain 21	R632_021	0.000249739	3.91222	3.67237	37.9176	2.89369	2.88725	0.787967	2.157e-05	1.06531	2.05123e-05	10.3251	0.000156263	-0.0884976	0.0547437	0.0768121	-0.0286246
	Grain 22	R632_022	0.000238466	3.76341	3.53284	36.4793	2.78409	2.77806	0.788065	1.86001e-05	1.06527	1.86151e-05	10.3258	0.000149167	0.0924097	0.0472087	0.010061	0.0524565
	Grain 23	R632_023	0.000228774	3.79028	3.55827	36.7403	2.80395	2.79789	0.788018	2.18496e-05	1.0652	2.21919e-05	10.3254	0.00016402	-0.0232448	0.0554534	-0.0690449	-0.0192974
	Grain 24	R632_024	0.000214679	3.76883	3.53787	36.5297	2.78784	2.78169	0.788007	2.13183e-05	1.06528	2.23911e-05	10.3254	0.000157633	-0.0134039	0.0541062	0.0584956	-0.00285508
	Grain 25	R632_025	0.000210796	3.77952	3.54805	36.635	2.79591	2.78985	0.788017	2.14535e-05	1.06524	2.14749e-05	10.3254	0.000171124	0.0879848	0.0544542	-0.0774167	0.038447
	Grain 26	R632_026	0.00021087	3.78572	3.55348	36.6884	2.79974	2.79411	0.787889	1.90609e-05	1.06536	1.9602e-05	10.3246	0.000153848	-0.0968109	0.0483801	0.0631535	-0.0345684
	Grain 27	R632_027	0.000253926	3.75789	3.5274	36.419	2.77928	2.77364	0.787913	1.6468e-05	1.06534	2.03765e-05	10.3246	0.00014981	0.0521816	0.0418038	0.000439917	0.0220649
	Grain 28	R632_028	0.000215239	3.74032	3.51096	36.2475	2.76611	2.76042	0.787855	2.00638e-05	1.06533	2.28131e-05	10.3241	0.000163299	-0.0666522	0.0509292	-0.00144466	-0.0525259
	Grain 29	R632_029	0.0010773	3.76752	3.53652	36.5135	2.78642	2.7808	0.787902	1.72805e-05	1.06532	2.08465e-05	10.3247	0.000142031	0.0453623	0.0438666	-0.00815684	0.038989
	Grain 30	R632_030	0.000450071	3.7871	3.55488	36.7022	2.8008	2.79514	0.787878	1.89609e-05	1.06532	2.29388e-05	10.3245	0.000166859	-0.133092	0.0481251	0.053377	-0.0554259
	Grain 31	R632_031	0.00749888	3.54815	3.33093	34.3931	2.62496	2.61984	0.788063	1.86498e-05	1.06521	1.80707e-05	10.3254	0.000130093	0.19759	0.04734	-0.0896932	0.0825961
	Grain 32	R632_032	0.000225532	3.72667	3.49825	36.1182	2.7564	2.75083	0.787937	2.01214e-05	1.0653	2.28369e-05	10.3246	0.000209698	-0.116782	0.0510677	0.0661525	-0.0691124
	Grain 33	R632_033	0.000230292	3.77655	3.54525	36.6056	2.79363	2.78829	0.787995	1.99438e-05	1.06524	1.81933e-05	10.3253	0.000163721	0.0250799	0.0506204	-0.037048	0.0266694
	Grain 34	R632_034	0.00021785	3.78453	3.55267	36.6826	2.79952	2.79397	0.788013	2.09898e-05	1.06526	2.03453e-05	10.3254	0.000157969	-0.0341826	0.0532709	0.021517	-0.0181783
	Grain 35	R632_035	0.000246868	3.75162	3.52186	36.3662	2.77551	2.77013	0.788086	2.08794e-05	1.06524	2.1487e-05	10.3259	0.000139153
2021-08-27	Grain 1	R632_001	0.000257193	3.64496	3.42164	35.3312	2.69645	2.69002	0.788067	1.96752e-05	1.06526	2.34908e-05	10.3259	0.000180378
	Grain 2	R632_002	0.000231836	3.72817	3.49939	36.131	2.75723	2.75044	0.787917	1.68375e-05	1.06537	2.20455e-05	10.3249	0.000181904	-0.088337	0.0427354	0.0572891	-0.0232522
	Grain 3	R632_003	0.000252141	3.80454	3.57111	36.8694	2.81366	2.80664	0.787907	1.90721e-05	1.06536	2.2773e-05	10.3244	0.00022253	0.0588343	0.0484148	-0.0129028	0.00253276
	Grain 4	R632_004	0.000233116	3.88557	3.64712	37.6524	2.8732	2.86597	0.787804	1.60632e-05	1.06538	2.12119e-05	10.3239	0.000138738	-0.0566687	0.0407773	0.00338548	-0.0248041
	Grain 5	R632_005	0.000222758	3.91397	3.67374	37.9271	2.89411	2.88685	0.78779	2.3497e-05	1.06539	2.25705e-05	10.3239	0.000175388	0.0492523	0.0596559	-0.0192937	0.0239343
	Grain 6	R632_006	0.00097582	3.98464	3.73991	38.6086	2.94593	2.9383	0.787698	1.69994e-05	1.06544	2.17332e-05	10.3234	0.000166237	-0.108354	0.0431577	0.0235467	0.0204329
	Grain 7	R632_007	0.00026323	3.90056	3.66098	37.791	2.88402	2.87667	0.787778	1.93911e-05	1.06544	2.06973e-05	10.3224	0.00113884	0.136036	0.0492365	-0.0329975	-0.0821839
	Grain 8	R632_008	0.000274034	4.05405	3.8048	39.2777	2.99682	2.98898	0.787643	1.69335e-05	1.06551	2.16964e-05	10.3232	0.000130392	-0.190175	0.0429898	0.0925139	-0.0132877
	Grain 9	R632_009	0.000606691	3.89338	3.65442	37.7288	2.87893	2.87178	0.787807	2.02787e-05	1.06538	2.42924e-05	10.3242	0.000151183	0.111422	0.0514871	-0.0774142	0.0640363
	Grain 10	R632_010	0.000222531	3.82053	3.58593	37.0208	2.82497	2.81772	0.787796	1.50488e-05	1.06542	2.09393e-05	10.3239	0.000136946	0.0109693	0.0382052	0.0410627	-0.006688
	Grain 11	R632_011	0.000215318	3.7411	3.51154	36.2522	2.76625	2.75916	0.787768	2.01062e-05	1.06537	1.95606e-05	10.3238	0.000165549	0.0105433	0.0510467	-0.0569734	-0.00363787
	Grain 12	R632_012	0.000242284	3.82447	3.58955	37.0575	2.82757	2.82037	0.787723	1.53709e-05	1.06545	2.35163e-05	10.3237	0.000138051	-0.0747464	0.0390232	0.0413888	0.00124839
	Grain 13	R632_013	0.000254568	3.76883	3.53738	36.5185	2.78674	2.77961	0.787796	1.78088e-05	1.06543	1.92919e-05	10.3236	0.000354148	0.0654718	0.0452147	0.00550445	-0.00901544
	Grain 14	R632_014	0.000227771	3.6678	3.44264	35.5407	2.71199	2.705	0.787766	1.66049e-05	1.0654	2.07735e-05	10.3237	0.000170158	-0.072326	0.0421539	-0.0098497	-0.0335102
	Grain 15	R632_015	0.000227441	3.64856	3.42459	35.3569	2.69803	2.69121	0.787849	1.90925e-05	1.0654	1.79348e-05	10.3245	0.000138139	0.0763916	0.0484711	-0.0124289	0.0473641
	Grain 16	R632_016	0.000224053	3.70727	3.47963	35.9244	2.74127	2.7344	0.787813	1.74177e-05	1.06542	2.22121e-05	10.3243	0.000154356	0.0406882	0.0442196	-0.00469439	0.0208583
	Grain 17	R632_017	0.000232826	3.72832	3.49931	36.1254	2.75643	2.74935	0.787712	2.11866e-05	1.06545	2.18602e-05	10.3236	0.000175952	-0.0484801	0.0537902	0.00131338	-0.0127297
	Grain 18	R632_018	0.000216191	3.68098	3.45477	35.6644	2.72125	2.71423	0.787688	2.08325e-05	1.06547	2.2091e-05	10.3233	0.000141604	0.01554	0.052896	-0.0211395	-0.0104435
	Grain 19	R632_019	0.00033021	3.74137	3.51121	36.2465	2.76555	2.75826	0.787639	1.68864e-05	1.06555	2.12425e-05	10.3231	0.000177483	-0.0287947	0.0428773	0.0295207	-0.00184723
	Grain 20	R632_020	0.00021253	3.71814	3.48939	36.0209	2.74835	2.74103	0.787635	2.0758e-05	1.06555	2.32358e-05	10.323	0.000192504	-0.0419472	0.0527074	0.0291261	-0.0231947
	Grain 21	R632_021	0.000247818	3.77052	3.5387	36.531	2.78738	2.78008	0.787698	2.43401e-05	1.0655	2.47187e-05	10.3233	0.000165019	0.0628042	0.0618044	-0.0212452	0.0376128
	Grain 22	R632_022	0.000262783	3.7834	3.55083	36.6548	2.79684	2.78945	0.787662	2.01235e-05	1.06549	2.0684e-05	10.3229	0.000172174	-0.0184528	0.0510959	-0.0236847	-0.0307201
	Grain 23	R632_023	0.000207954	3.72181	3.49289	36.0575	2.75115	2.74398	0.787654	2.32217e-05	1.06554	2.16523e-05	10.3232	0.000176862	-0.0379416	0.058962	0.0399757	0.00931452
	Grain 24	R632_024	0.000203124	3.73684	3.50712	36.2045	2.76256	2.75524	0.787707	2.18481e-05	1.0655	2.18662e-05	10.3232	0.00018444	0.0526265	0.0554756	-0.0247721	0.00326345
	Grain 25	R632_025	0.000246259	3.80642	3.57241	36.8785	2.81391	2.80658	0.787676	1.89299e-05	1.06551	2.19773e-05	10.3231	0.000157507	-0.0277805	0.0480638	-0.000676551	-0.0101031
	Grain 26	R632_026	0.000209575	3.74491	3.51463	36.2825	2.76842	2.76123	0.78769	1.80986e-05	1.06552	2.34395e-05	10.3233	0.000165822	-0.00543219	0.0459533	0.0205916	0.00401696
	Grain 27	R632_027	0.000228559	3.72886	3.49967	36.1285	2.75672	2.74956	0.787712	2.09329e-05	1.06549	2.28004e-05	10.3234	0.000158829	0.0154829	0.0531496	0.0222366	0.00855646
	Grain 28	R632_028	0.000248376	3.72516	3.49646	36.0948	2.75416	2.74711	0.787709	1.97205e-05	1.06541	2.18037e-05	10.3233	0.000175595	0.0801818	0.0500746	-0.0929978	0.0866218
	Grain 29	R632_029	0.000245457	3.93544	3.69343	38.1215	2.90888	2.90124	0.78758	1.82974e-05	1.06553	1.68358e-05	10.3214	0.00113302	-0.132564	0.0464588	0.0734416	-0.164603
	Grain 30	R632_030	0.000206278	3.70875	3.48079	35.9321	2.74168	2.73452	0.78766	2.06896e-05	1.06549	2.05678e-05	10.3229	0.000177476	0.0295974	0.0525358	-0.0209554	0.0567077
	Grain 31	R632_031	0.000246598	3.76378	3.5324	36.4658	2.78241	2.77523	0.787694	2.32095e-05	1.0655	2.44169e-05	10.3233	0.000181583	0.0438185	0.0589328	-0.00532301	0.0214981
	Grain 32	R632_032	0.000256532	3.91219	3.67164	37.9032	2.892	2.88428	0.787658	1.76227e-05	1.06551	2.04802e-05	10.3232	0.000152736	-0.0677249	0.0447439	0.00323208	-0.0291686
	Grain 33	R632_033	0.000265412	3.79836	3.56475	36.8012	2.80801	2.80081	0.787729	2.4511e-05	1.06553	2.21167e-05	10.3237	0.000156302	0.102186	0.0622383	0.0161799	0.00901418
	Grain 34	R632_034	0.0265601	3.80399	3.57013	36.8579	2.81197	2.80486	0.78764	1.81479e-05	1.0655	2.0199e-05	10.324	0.000169901	-0.13579	0.0460754	0.0258051	0.0623129
	Grain 35	R632_035	0.00022287	3.6682	3.44294	35.5414	2.71219	2.70514	0.787764	2.31024e-05	1.06543	2.31269e-05	10.3231	0.000589315
2021-08-27	Grain 1	R632_001	0.000235921	3.92434	3.68286	38.0158	2.90041	2.89281	0.787542	1.84432e-05	1.06557	2.06925e-05	10.3224	0.000163697
	Grain 2	R632_002	0.000239619	3.95636	3.71271	38.3239	2.92387	2.91627	0.78753	1.79925e-05	1.06563	2.28705e-05	10.3224	0.000129023	-0.0140631	0.0456929	0.0406403	-0.00548391
	Grain 3	R632_003	0.000245728	3.94088	3.6983	38.1755	2.91255	2.9052	0.787541	2.03572e-05	1.06559	2.1659e-05	10.3224	0.000173521	-0.0233081	0.0516971	0.00627978	0.0102378
	Grain 4	R632_004	0.00025766	3.92953	3.6878	38.0667	2.90446	2.89691	0.787587	1.75152e-05	1.06555	2.13554e-05	10.3223	0.000224154	0.0394332	0.04448	-0.00531307	-0.0190561
	Grain 5	R632_005	0.00022511	3.94735	3.70464	38.2416	2.91767	2.91023	0.787572	1.9442e-05	1.06552	2.59501e-05	10.3226	0.000162054	0.0250952	0.0493732	-0.0349795	0.0301528
	Grain 6	R632_006	0.000212924	3.97427	3.72976	38.4996	2.93725	2.92973	0.787517	1.8856e-05	1.06556	2.3758e-05	10.3223	0.000165193	-0.125539	0.0478811	0.0146627	-0.018489
	Grain 7	R632_007	0.000187425	3.95972	3.71607	38.3584	2.927	2.91933	0.78766	2.10328e-05	1.06557	2.34144e-05	10.3223	0.000642884	0.0564907	0.0534086	0.0342479	-0.0617302
	Grain 8	R632_008	0.000973416	3.95295	3.70995	38.3	2.92238	2.91494	0.787714	1.79284e-05	1.0655	2.1192e-05	10.3236	0.000178822	0.0424554	0.0455221	-0.0105565	0.06535
	Grain 9	R632_009	0.000229997	3.87794	3.63968	37.5744	2.86698	2.85986	0.787701	1.75265e-05	1.06546	1.9542e-05	10.3235	0.00014686	0.0439142	0.0445023	-0.0325787	0.0851574
	Grain 10	R632_010	0.000236288	3.96139	3.71792	38.3755	2.9283	2.92092	0.787619	1.706e-05	1.06549	2.15282e-05	10.3217	0.000670088	-0.0845742	0.0433167	0.00811801	-0.145913
	Grain 11	R632_011	0.000224683	3.95066	3.7078	38.2756	2.92053	2.91326	0.787671	1.79013e-05	1.0655	1.88979e-05	10.323	0.000352716	-0.00638586	0.0454534	0.0298384	0.0255418
	Grain 12	R632_012	0.000264842	3.98501	3.74023	38.6128	2.94629	2.9389	0.787732	1.83909e-05	1.06545	1.96518e-05	10.3236	0.000161055	0.0192706	0.0466943	-0.00674917	0.0326718
	Grain 13	R632_013	0.000205853	3.93273	3.69129	38.1077	2.90786	2.90077	0.787763	1.64566e-05	1.06541	2.37016e-05	10.3237	0.000225883	0.0381669	0.0417823	-0.0426188	0.00302194
	Grain 14	R632_014	0.000238502	3.98537	3.74052	38.6157	2.94653	2.93948	0.787733	1.73512e-05	1.06546	1.88922e-05	10.3236	0.000151985	-0.0398479	0.0440518	0.0628877	-0.0170607
	Grain 15	R632_015	0.000271278	3.97116	3.72746	38.482	2.93637	2.92955	0.787767	1.82061e-05	1.06538	2.15726e-05	10.3239	0.000156438	0.0306902	0.0462235	-0.0735523	0.025341
	Grain 16	R632_016	0.000236674	3.95052	3.70783	38.2785	2.92085	2.91395	0.787752	1.88317e-05	1.06546	2.18592e-05	10.3237	0.000166563	-0.0504836	0.0478089	0.0568711	-0.0338261
	Grain 17	R632_017	0.000321849	3.87744	3.63939	37.5736	2.86717	2.86047	0.787817	1.86465e-05	1.06541	2.02823e-05	10.3242	0.000148291	0.0894154	0.0473413	-0.00767591	0.0565716
	Grain 18	R632_018	0.000223954	3.92875	3.68766	38.0694	2.90492	2.8983	0.787741	1.76997e-05	1.06538	2.23635e-05	10.3235	0.000169152	-0.0722268	0.0449347	-0.0104711	-0.0341438
	Grain 19	R632_019	0.000244873	3.92328	3.68255	38.0168	2.90104	2.89434	0.787778	1.80658e-05	1.06537	2.16867e-05	10.3235	0.000292997	0.00186676	0.0458654	-0.00033521	-0.0192845
	Grain 20	R632_020	0.000223228	3.94385	3.70187	38.2179	2.9164	2.90967	0.787813	1.99284e-05	1.06537	1.81149e-05	10.3239	0.00018152	-0.0222975	0.0505905	0.00974002	-0.0180149
	Grain 21	R632_021	0.000229345	3.769	3.53784	36.527	2.7874	2.78071	0.787883	1.79814e-05	1.06534	2.39037e-05	10.3247	0.000146592	0.0366276	0.0456465	-0.00303996	0.0381534
	Grain 22	R632_022	0.00023006	3.81175	3.57804	36.9421	2.81912	2.81238	0.787895	1.95497e-05	1.06532	2.17375e-05	10.3247	0.000158672	0.0217048	0.0496262	-0.0194974	-0.00183899
	Grain 23	R632_023	0.000226412	3.85995	3.62321	37.4086	2.85462	2.84793	0.787873	1.96809e-05	1.06534	2.25857e-05	10.3247	0.000156643	-0.0257772	0.0499582	0.039182	0.00773048
	Grain 24	R632_024	0.000423836	3.76522	3.5345	36.4922	2.7848	2.77824	0.787891	1.7975e-05	1.06528	1.87991e-05	10.3246	0.000161444	0.000682808	0.0456281	-0.035453	-0.0101447
	Grain 25	R632_025	0.000218931	3.78793	3.55578	36.7122	2.80163	2.79511	0.787909	1.5842e-05	1.06529	2.2649e-05	10.3247	0.00014677	0.0711066	0.0402157	-0.0163413	0.0325495
	Grain 26	R632_026	0.000230623	3.88228	3.64419	37.6228	2.87093	2.86449	0.787814	1.72445e-05	1.06534	2.44909e-05	10.3241	0.000172063	-0.0727045	0.0437749	0.00984942	-0.020812
	Grain 27	R632_027	0.000204895	3.7325	3.5035	36.1698	2.76016	2.75374	0.787834	2.0984e-05	1.06536	2.25339e-05	10.3239	0.000157862	0.0633136	0.0532736	-0.00505939	0.00876718
	Grain 28	R632_028	0.000203778	3.7694	3.53802	36.5249	2.78707	2.78052	0.787754	2.18027e-05	1.0654	2.2183e-05	10.3236	0.000184315	-0.103225	0.0553484	0.03257	-0.0516099
	Grain 29	R632_029	0.000200741	3.70477	3.47746	35.9022	2.73966	2.73341	0.787837	2.00121e-05	1.06537	2.37327e-05	10.3243	0.000173215	-0.0229579	0.0508014	0.0182293	-0.00410522
	Grain 30	R632_030	0.00022043	3.58807	3.36812	34.7762	2.65393	2.64792	0.787956	1.89766e-05	1.0653	2.61426e-05	10.3251	0.000169793	0.13052	0.048173	-0.0450418	0.0663182
	Grain 31	R632_031	0.000219891	3.64012	3.41691	35.278	2.69208	2.68592	0.787869	2.26102e-05	1.06532	2.13817e-05	10.3245	0.000174096	-0.0972723	0.0573902	0.034421	-0.0313891
	Grain 32	R632_032	0.000190511	3.53221	3.31576	34.2339	2.61259	2.6066	0.787936	1.96007e-05	1.06528	2.39003e-05	10.3246	0.000209943	0.00630713	0.0497522	-0.0346481	-0.0229646
	Grain 33	R632_033	0.000191203	3.53718	3.32036	34.2833	2.6164	2.61044	0.787993	2.05922e-05	1.0653	2.02299e-05	10.3252	0.00017297	0.035452	0.0522668	0.0475019	0.0195501
	Grain 34	R632_034	0.000213462	3.58491	3.3654	34.7489	2.65191	2.646	0.787994	2.29472e-05	1.06523	2.05548e-05	10.3254	0.000179452	0.0553806	0.0582452	-0.0598479	0.0312316
	Grain 35	R632_035	0.000209554	3.61061	3.38936	34.9947	2.6705	2.66451	0.787907	1.52621e-05	1.06528	2.39652e-05	10.3249	0.000139548
2021-08-27	Grain 1	R632_001	0.000274645	3.63635	3.41018	35.175	2.68201	2.67315	0.786472	1.9656e-05	1.06632	2.2233e-05	10.3147	0.000483474
	Grain 2	R632_002	0.0002692	3.69474	3.46481	35.7392	2.72472	2.71566	0.786399	1.81168e-05	1.06636	2.17515e-05	10.3149	0.000147011	0.000184412	0.0460754	-0.0188515	0.0274672
	Grain 3	R632_003	0.00023432	3.8217	3.58359	36.9632	2.81787	2.8085	0.786326	1.8282e-05	1.06644	2.63386e-05	10.3146	0.000144637	-0.0734146	0.0464965	0.0707193	-0.00732966
	Grain 4	R632_004	0.000283401	3.87123	3.63028	37.444	2.85473	2.84522	0.786368	1.77701e-05	1.06637	2.30473e-05	10.3144	0.00026126	0.0369528	0.0451971	-0.0523521	-0.0194925
	Grain 5	R632_005	0.000256141	3.77445	3.53938	36.5071	2.78319	2.77396	0.786352	2.18837e-05	1.06641	2.23188e-05	10.3146	0.000189798	-0.0231258	0.0556575	0.0363826	-0.00106234
	Grain 6	R632_006	0.000286463	3.72125	3.48961	35.9945	2.74412	2.73498	0.786372	2.09853e-05	1.06638	2.51032e-05	10.3148	0.00017041	-0.0213182	0.0533714	-0.00339741	0.0028105
	Grain 7	R632_007	0.00028235	3.82765	3.58949	37.0255	2.82287	2.81429	0.786426	1.9624e-05	1.06635	2.04452e-05	10.315	0.000165384	0.0646506	0.0499101	-0.00558293	0.0201664
	Grain 8	R632_008	0.000289471	3.74645	3.5134	36.2397	2.76286	2.75455	0.786378	2.24776e-05	1.06633	2.64718e-05	10.3147	0.000174624	-0.103715	0.0571614	0.00285134	-0.0458911
	Grain 9	R632_009	0.00028216	3.80068	3.56433	36.7675	2.80331	2.79492	0.786493	2.0505e-05	1.06631	2.1413e-05	10.3154	0.00016028	0.121504	0.0521492	-0.0168432	0.0625394
	Grain 10	R632_010	0.000278058	3.7697	3.53524	36.4653	2.78017	2.77176	0.786418	2.31563e-05	1.06632	2.08354e-05	10.3148	0.00018668	-0.0329956	0.0588888	-0.0077971	-0.0309598
	Grain 11	R632_011	0.000252841	3.8276	3.58943	37.0244	2.82269	2.81492	0.786394	2.24711e-05	1.06635	2.09151e-05	10.3149	0.000197685	-0.0339044	0.0571477	0.035033	-0.00365197
	Grain 12	R632_012	0.000252796	3.7858	3.55039	36.6221	2.79211	2.78426	0.786423	2.19027e-05	1.06631	2.14411e-05	10.315	0.000171793	-0.0552723	0.0556989	-0.0168533	0.0154671
	Grain 13	R632_013	0.000251774	3.76559	3.53146	36.4262	2.77763	2.76976	0.786539	2.04364e-05	1.0663	2.33234e-05	10.3148	0.000635253	0.0995562	0.0519705	-0.0119989	-0.045616
	Grain 14	R632_014	0.000283186	3.83169	3.59339	37.0677	2.82619	2.81842	0.786499	2.06529e-05	1.06632	1.96545e-05	10.3155	0.00016944	0.0277266	0.0525199	0.00769707	0.102114
	Grain 15	R632_015	0.000280216	3.76554	3.53136	36.423	2.77711	2.7695	0.786415	2.18794e-05	1.06632	2.33001e-05	10.3142	0.000463033	-0.0835179	0.0556388	0.000439818	-0.114559
	Grain 16	R632_016	0.000244136	3.79892	3.56267	36.7494	2.8019	2.79414	0.786463	1.67164e-05	1.06632	2.31855e-05	10.3152	0.000150138	0.093047	0.0425142	0.00848165	0.0830528
	Grain 17	R632_017	0.000282684	3.79462	3.5587	36.7059	2.79842	2.79053	0.786364	2.32599e-05	1.0663	2.42725e-05	10.3144	0.00018071	-0.0811121	0.0591532	-0.0452213	-0.046624
	Grain 18	R632_018	0.000251033	3.77872	3.54353	36.5504	2.7866	2.77853	0.786393	2.33772e-05	1.06637	2.41716e-05	10.3147	0.00020535	-0.0639046	0.0594504	0.0649301	-0.034911
	Grain 19	R632_019	0.000256656	3.7642	3.53011	36.4153	2.7765	2.76886	0.786522	1.87991e-05	1.06631	1.82416e-05	10.3157	0.000165647	0.0816464	0.0478069	-0.00668658	0.0607044
	Grain 20	R632_020	0.000241643	3.66493	3.43716	35.4555	2.70339	2.69585	0.786523	1.87736e-05	1.06627	2.60501e-05	10.3154	0.00013949	-0.0108591	0.0477378	-0.0128134	-0.0276522
	Grain 21	R632_021	0.000240256	3.70511	3.47491	35.8459	2.73315	2.72394	0.786541	2.05255e-05	1.06625	2.29805e-05	10.3157	0.000169503	0.0281796	0.0521932	-0.0205945	0.0119916
	Grain 22	R632_022	0.000238852	3.65407	3.42696	35.3514	2.69535	2.68636	0.786515	2.30637e-05	1.06627	2.02345e-05	10.3157	0.000180521	-0.0392413	0.0586455	0.0325206	-0.00913983
	Grain 23	R632_023	0.0002406	3.67079	3.44279	35.5155	2.70792	2.69898	0.78655	2.29853e-05	1.06623	1.96904e-05	10.3159	0.00019199	0.0216006	0.0584472	-0.0416698	0.0295955
	Grain 24	R632_024	0.000243288	3.61864	3.39373	35.0081	2.66934	2.66043	0.786551	2.06885e-05	1.06627	2.19724e-05	10.3155	0.00031343	0.0123425	0.0526062	0.0094215	-0.0244561
	Grain 25	R632_025	0.000262625	3.76284	3.5289	36.4029	2.7756	2.76626	0.786533	1.61385e-05	1.06629	2.33638e-05	10.3157	0.000156411	0.045593	0.0410389	-0.0182684	0.0947869
	Grain 26	R632_026	0.000238042	3.66264	3.43473	35.4253	2.70122	2.6932	0.786443	1.88391e-05	1.06636	1.98992e-05	10.3138	0.000769377	-0.0660049	0.0479066	0.0479624	-0.158792
	Grain 27	R632_027	0.000228928	3.65818	3.43066	35.3882	2.69807	2.69025	0.786457	2.16215e-05	1.06632	2.30661e-05	10.3153	0.000180465	0.00204809	0.0549847	-0.0170855	0.068113
	Grain 28	R632_028	0.000237262	3.64089	3.41446	35.2212	2.68536	2.67749	0.786468	2.04651e-05	1.06632	2.11799e-05	10.3153	0.000150549	0.0473545	0.0520456	-0.0118992	0.101376
	Grain 29	R632_029	0.000233036	3.66381	3.43588	35.4352	2.70199	2.69409	0.786405	1.71104e-05	1.06634	1.91899e-05	10.3132	0.00119321	-0.0494147	0.0435134	0.0266903	-0.15175
	Grain 30	R632_030	0.000254669	3.70793	3.47737	35.8665	2.73466	2.72657	0.786419	2.24764e-05	1.0663	2.26489e-05	10.3143	0.000601857	-0.0035582	0.0571611	-0.0115214	0.0112788
	Grain 31	R632_031	0.000240144	3.68049	3.45167	35.6045	2.71453	2.70613	0.786438	2.01514e-05	1.06629	2.5799e-05	10.3152	0.000160685	-0.0502043	0.0512446	-0.00800986	0.000171934
	Grain 32	R632_032	0.00416041	3.5719	3.3498	34.5566	2.63474	2.62659	0.786537	2.09106e-05	1.0663	2.12996e-05	10.316	0.000177658	0.108976	0.0531772	0.0182389	0.0818835
	Grain 33	R632_033	0.000319063	3.65477	3.42763	35.3565	2.69571	2.68736	0.786464	2.07859e-05	1.06627	2.41712e-05	10.3151	0.000175485	-0.0292223	0.0528575	-0.0368357	-0.0354632
	Grain 34	R632_034	0.000265218	3.72873	3.49684	36.07	2.75005	2.74149	0.786437	1.83917e-05	1.06632	2.46618e-05	10.315	0.00017108	-0.0741168	0.0467688	0.0262144	-0.0447436
	Grain 35	R632_035	0.000257711	3.63453	3.40852	35.1618	2.68089	2.67263	0.786527	2.1615e-05	1.06631	2.2073e-05	10.3158	0.000171433
2021-08-30	Grain 1	R632_001	0.000243993	4.27054	4.0085	41.3828	3.15783	3.15006	0.787783	1.586e-05	1.06537	1.80155e-05	10.3238	0.000129931
	Grain 2	R632_002	0.00025206	4.20321	3.94522	40.7305	3.10803	3.10048	0.787796	1.47673e-05	1.06539	2.22366e-05	10.324	0.000142812	0.0591924	0.0374923	-0.0299585	0.0384246
	Grain 3	R632_003	0.000257092	4.23971	3.97915	41.0787	3.13444	3.12666	0.787716	1.81361e-05	1.06548	2.02242e-05	10.3235	0.000137789	-0.0373608	0.0460455	0.0755463	-0.0179286
	Grain 4	R632_004	0.000254989	4.10197	3.85014	39.7462	3.03274	3.02543	0.787695	1.54699e-05	1.06541	2.22945e-05	10.3233	0.000154175	-0.00821236	0.0392785	-0.0597351	0.0132647
	Grain 5	R632_005	0.000244519	4.15821	3.90273	40.2872	3.07412	3.06673	0.787687	1.58412e-05	1.06546	1.89281e-05	10.3229	0.000406298	0.00203401	0.0402221	0.0521984	0.00277558
	Grain 6	R632_006	0.000260744	4.20855	3.95019	40.7754	3.11146	3.10392	0.787676	1.58377e-05	1.0654	1.9088e-05	10.3224	0.000438135	-0.00822717	0.0402134	-0.0644474	-0.0623206
	Grain 7	R632_007	0.000275952	4.24222	3.98149	41.1016	3.13613	3.12828	0.787677	1.34663e-05	1.06548	1.57305e-05	10.3232	0.000142839	-0.022632	0.0341917	0.0490478	0.0274146
	Grain 8	R632_008	0.000293961	4.23643	3.97616	41.0473	3.13207	3.12463	0.787715	1.64866e-05	1.06546	1.84278e-05	10.3234	0.000160196	0.0578497	0.0418618	-0.0197441	0.018501
	Grain 9	R632_009	0.000271858	4.23936	3.97884	41.0744	3.13397	3.12655	0.787661	1.33484e-05	1.06548	1.6687e-05	10.3232	0.000127888	-0.0134184	0.0338933	0.00245194	0.0144701
	Grain 10	R632_010	0.000273044	4.27314	4.0105	41.3994	3.15879	3.15077	0.787628	1.44845e-05	1.06549	2.03316e-05	10.3228	0.000127733	-0.0190088	0.0367793	0.0104685	-0.0166539
	Grain 11	R632_011	0.000244231	4.28994	4.0263	41.5621	3.17122	3.16319	0.787626	1.6048e-05	1.06548	2.01932e-05	10.3226	0.000128594	-0.00398776	0.0407501	0.00624024	-0.0171118
	Grain 12	R632_012	0.000258269	4.19039	3.93296	40.5995	3.09771	3.08995	0.787629	1.76269e-05	1.06546	1.96875e-05	10.3229	0.000156374	0.0210717	0.0447604	-0.0298467	0.0518626
	Grain 13	R632_013	0.000251235	4.24951	3.98829	41.1674	3.14117	3.13323	0.7876	1.65809e-05	1.0655	1.73254e-05	10.322	0.000347171	-0.0948443	0.0421009	0.024079	-0.112665
	Grain 14	R632_014	0.000212969	4.14419	3.88949	40.1533	3.06382	3.05612	0.787719	1.46182e-05	1.06548	2.12111e-05	10.3235	0.000108885	0.132667	0.0371202	0.0116378	0.109695
	Grain 15	R632_015	0.000250662	4.24179	3.98123	41.0973	3.13574	3.12784	0.78763	1.54948e-05	1.06545	1.80974e-05	10.3228	0.000146463	-0.0793347	0.0393423	-0.0269681	-0.0499472
	Grain 16	R632_016	0.000256828	4.1798	3.92296	40.4969	3.08998	3.08221	0.787666	1.92761e-05	1.06547	1.92942e-05	10.323	0.000178516	-0.027333	0.0489435	0.0419061	-0.0119223
	Grain 17	R632_017	0.000273811	4.15927	3.90394	40.3025	3.07531	3.06769	0.787745	1.36136e-05	1.0654	1.95246e-05	10.3235	0.000115944	0.0894432	0.0345667	-0.0450422	0.0454699
	Grain 18	R632_018	0.000239815	4.22073	3.96153	40.8953	3.12043	3.11255	0.787683	1.43535e-05	1.06543	1.88781e-05	10.3231	0.000128042	-0.0451551	0.0364432	-0.00212621	-0.0235403
	Grain 19	R632_019	0.000259781	4.15964	3.90406	40.3023	3.0752	3.06757	0.787692	1.65223e-05	1.06546	2.10743e-05	10.3232	0.000144426	-0.0438367	0.0419495	0.0476702	-0.0222225
	Grain 20	R632_020	0.000241059	4.15164	3.89681	40.2294	3.06979	3.06214	0.78777	1.688e-05	1.06539	2.22999e-05	10.3237	0.000133859	0.128665	0.0428607	-0.0804084	0.0598501
	Grain 21	R632_021	0.000613661	4.21538	3.95626	40.8402	3.11613	3.10929	0.787646	1.50442e-05	1.0655	1.73167e-05	10.3229	0.000111791	-0.040951	0.0381989	0.0362177	0.00897083
	Grain 22	R632_022	0.00023356	4.21233	3.95331	40.8063	3.11357	3.10657	0.787586	1.81218e-05	1.06552	1.89082e-05	10.322	0.000309921	-0.0618143	0.0460157	0.0153341	-0.0927044
	Grain 23	R632_023	0.000250801	4.10786	3.85528	39.7982	3.03651	3.02918	0.787623	1.78539e-05	1.06552	1.98229e-05	10.323	0.000165864	0.00625877	0.0453365	0.0181735	0.0483439
	Grain 24	R632_024	0.000260925	4.13853	3.88422	40.097	3.0594	3.05192	0.78765	1.79746e-05	1.06547	1.69573e-05	10.323	0.000162222	-0.017784	0.0456402	-0.0130535	0.00822904
	Grain 25	R632_025	0.000326776	4.13377	3.87983	40.0512	3.05616	3.04894	0.787706	1.76984e-05	1.06545	2.05993e-05	10.3229	0.000465847	0.045433	0.0449387	-0.00704823	-0.0320538
	Grain 26	R632_026	0.000248488	4.06291	3.81333	39.3664	3.00371	2.9965	0.78769	1.489e-05	1.06545	1.8283e-05	10.3234	0.000129719	-0.0369679	0.0378053	0.0141062	0.0153153
	Grain 27	R632_027	0.000242033	3.98779	3.74296	38.6407	2.94845	2.94144	0.787732	1.80519e-05	1.06541	1.97791e-05	10.3236	0.000146414	0.0934185	0.0458368	-0.0506059	0.0410108
	Grain 28	R632_028	0.000246922	4.13188	3.87792	40.0314	3.05435	3.04685	0.787627	1.74665e-05	1.06549	2.06976e-05	10.3229	0.000142093	-0.0593714	0.0443496	0.0418106	-0.020858
	Grain 29	R632_029	0.00024774	4.0853	3.83426	39.5798	3.01992	3.01252	0.787616	1.81751e-05	1.06547	1.93245e-05	10.3227	0.000141489	-0.0437678	0.0461501	-0.0245777	-0.0410888
	Grain 30	R632_030	0.00025979	4.06319	3.81337	39.3666	3.00369	2.99636	0.787673	1.7913e-05	1.06551	1.98519e-05	10.3233	0.000146089	0.0525716	0.0454858	0.00504982	0.0367109
	Grain 31	R632_031	0.000253892	4.06735	3.81717	39.4053	3.00659	2.9993	0.787648	1.7479e-05	1.06554	1.9193e-05	10.3231	0.00013459	0.00515875	0.0443829	0.000270797	0.0157083
	Grain 32	R632_032	0.000245624	4.18498	3.92747	40.542	3.09333	3.08578	0.787614	1.47133e-05	1.06557	1.80907e-05	10.3227	0.000223318	0.00398614	0.037362	0.0303157	0.0129054
	Grain 33	R632_033	0.000257297	4.23365	3.9733	41.0121	3.12926	3.12181	0.787575	1.51068e-05	1.06553	2.04455e-05	10.3219	0.000521228	-0.0482494	0.0383609	-0.0266149	-0.0757329
	Grain 34	R632_034	0.00025851	4.2728	4.00995	41.3939	3.15828	3.1507	0.787611	1.49287e-05	1.06555	1.69379e-05	10.3228	0.000147349	0.0103406	0.0379091	0.0117149	0.0326758
	Grain 35	R632_035	0.000273609	4.15843	3.90265	40.2868	3.07384	3.06649	0.787631	1.53211e-05	1.06554	2.17499e-05	10.3229	0.000127132

## Sheet: RMJG
Time	Grain	Sample	44Ca	46Ti	47Ti	48Ti	49Ti	50Ti	49Ti/47Ti	se	46Ti/47Ti	se	48Ti/47Ti	se	δ49/47Ti	2se	δ46/47Ti	δ48/47Ti
2021-08-31	Grain 1	RMJG_001	0.000191736	4.0887	3.84164	39.6999	3.03242	3.03104	0.789356	1.75567e-05	1.06431	2.35163e-05	10.3341	0.000368079
		RMJG_002	0.000171276	4.04562	3.80219	39.3024	3.00298	3.00212	0.789802	1.74513e-05	1.06402	1.89937e-05	10.3368	0.000400684	0.194604	0.0442002	-0.0492607	0.061764
		RMJG_003	0.000175704	4.06225	3.81848	39.476	3.01637	3.01597	0.78994	1.82353e-05	1.06384	2.08442e-05	10.3381	0.000140355	-0.0513457	0.0461665	-0.0276126	-0.00816931
		RMJG_004	0.000208116	4.10904	3.86292	39.9415	3.05232	3.05216	0.79016	1.71728e-05	1.06372	1.77685e-05	10.3397	0.000151205	0.117576	0.0434717	-0.0450143	0.067639
	Grain 2	RMJG_005	0.00017794	4.17997	3.92971	40.6327	3.10523	3.10531	0.790194	1.69006e-05	1.06369	2.38458e-05	10.3399	0.000155965	-0.103941	0.0427715	0.0273734	-0.050391
		RMJG_006	0.000184751	4.1965	3.94557	40.8015	3.11855	3.11896	0.790392	1.61006e-05	1.0636	1.65911e-05	10.3411	0.000147564	0.0829402	0.0407442	-0.00506604	0.0393827
		RMJG_007	0.000170817	4.17928	3.92966	40.6384	3.10623	3.10692	0.790459	1.5851e-05	1.06352	1.81168e-05	10.3415	0.000141445	0.0364746	0.0401073	-0.0274705	-0.000459061
		RMJG_008	0.00018261	4.21985	3.96787	41.0352	3.13648	3.13708	0.790468	1.3579e-05	1.06351	2.11521e-05	10.3419	0.000142686	-0.0755726	0.0343544	0.0355304	-0.0150599
	Grain 3	RMJG_009	0.000178284	4.13059	3.88428	40.1735	3.0709	3.07233	0.790597	1.50939e-05	1.06341	1.99385e-05	10.3426	0.000142251	0.0370659	0.0381849	-0.0180103	0.0177774
		RMJG_010	0.00018298	4.02064	3.78108	39.1074	2.98957	2.99094	0.790667	1.48826e-05	1.06336	1.97458e-05	10.3429	0.000134706	0.0126487	0.0376461	-0.0162432	0.00685072
		RMJG_011	0.000167831	4.07508	3.83234	39.6385	3.0303	3.03187	0.790717	1.7271e-05	1.06334	1.93773e-05	10.3431	0.000198533	0.00688909	0.0436848	-0.00705873	-0.0196658
		RMJG_012	0.00017076	4.02005	3.78062	39.1057	2.98955	2.99112	0.790757	1.62485e-05	1.06333	2.04575e-05	10.3437	0.000138998	0.0647731	0.0410987	-0.00823228	0.0596154
	Grain 4	RMJG_013	0.000198498	3.98349	3.74618	38.7472	2.96208	2.96327	0.790694	1.52343e-05	1.06335	2.02128e-05	10.3431	0.000133371	-0.117304	0.0385294	0.0733275	-0.0573872
		RMJG_014	0.000151123	3.81975	3.59269	37.1615	2.84115	2.84262	0.790816	1.53394e-05	1.0632	1.79781e-05	10.3437	0.000244304	0.00933898	0.0387942	-0.0515866	0.0224748
		RMJG_015	0.000126229	3.49998	3.29203	34.0519	2.60375	2.60515	0.790924	2.09776e-05	1.06317	2.11187e-05	10.3438	0.000685515	0.0819303	0.0530501	-0.0379695	-0.031064
		RMJG_016	0.000151732	3.71197	3.49126	36.1152	2.76123	2.76259	0.790902	1.96482e-05	1.06322	1.9815e-05	10.3445	0.000147341	-0.000715377	0.0496854	0.0441939	0.0397731
		RMJG_017	0.000140566	3.69763	3.47793	35.9771	2.75062	2.75209	0.790881	1.57346e-05	1.06317	1.92648e-05	10.3444	0.000142742	-0.0351593	0.0397887	-0.0479766	-0.0214785
		RMJG_018	0.000349998	3.66491	3.44698	35.6582	2.72627	2.72775	0.790916	1.76851e-05	1.06322	1.80005e-05	10.3448	0.000134485	-0.013751	0.04472	0.0631311	0.0181865
		RMJG_019	0.000770766	3.67654	3.45818	35.774	2.73532	2.73674	0.790972	1.87499e-05	1.06314	2.13631e-05	10.3448	0.00018999	0.0585491	0.0474124	-0.0440841	-0.0137963
		RMJG_020	0.000153102	3.5825	3.36967	34.8593	2.66519	2.66666	0.790936	1.84705e-05	1.06316	2.21871e-05	10.345	0.000140662	0.00394266	0.0467057	-0.0226121	0.0378497
		RMJG_021	0.000142597	3.69319	3.47357	35.9324	2.74723	2.7486	0.790894	1.59784e-05	1.06322	2.28957e-05	10.3445	0.000144562	-0.050769	0.0404039	0.0602638	-0.0480332
	Grain 5	RMJG_022	0.000145123	3.43665	3.2325	33.4402	2.55669	2.55723	0.790932	1.64287e-05	1.06316	1.90048e-05	10.345	0.00012453	0.0114765	0.0415432	-0.0265887	0.0262057
		RMJG_023	0.00013986	3.43269	3.2288	33.4018	2.55383	2.55436	0.790952	1.7605e-05	1.06315	2.13826e-05	10.3449	0.000148281
2021-05-29	Grain 1	RMJG_001	0.000515791	3.42066	3.20468	33.0268	2.51563	2.51152	0.784992	1.56371e-05	1.0674	1.94447e-05	10.3058	0.000151389
	Grain 2	RMJG_002	0.000510717	3.40396	3.18907	32.866	2.50336	2.4993	0.784982	1.33753e-05	1.06738	1.66749e-05	10.3059	0.00011369	0.0134658	0.0340784	0.0119123	0.0124588
	Grain 3	RMJG_003	0.000506809	3.32354	3.11387	32.0902	2.44424	2.43927	0.784951	1.70632e-05	1.06734	1.60084e-05	10.3056	0.000129265	0.023135	0.0434768	-0.0556658	0.0189423
	Grain 4	RMJG_004	0.000520261	3.31385	3.10457	31.9927	2.43675	2.4318	0.784884	1.45462e-05	1.06742	1.80039e-05	10.305	0.00012099	-0.0430604	0.0370642	0.0451294	-0.0269478
	Grain 5	RMJG_005	0.000506324	3.3208	3.11111	32.0603	2.44187	2.43669	0.784885	1.44489e-05	1.0674	1.65862e-05	10.3049	0.000127916	-0.0388535	0.0368165	-0.00339195	-0.0215059
	Grain 6	RMJG_006	0.000513514	3.35692	3.14501	32.4102	2.46863	2.46327	0.784946	1.45281e-05	1.06738	1.81924e-05	10.3053	0.000138391	0.0423556	0.0370185	-0.0044715	0.00512662
	Grain 7	RMJG_007	0.0011903	3.31925	3.10968	32.0469	2.4409	2.43573	0.784941	1.37062e-05	1.06738	1.9444e-05	10.3056	0.000122856	0.0401336	0.0349244	-0.0188151	0.041333
	Grain 8	RMJG_008	0.000687039	3.29063	3.08281	31.7682	2.41961	2.41354	0.784873	1.62644e-05	1.06742	1.71578e-05	10.305	0.000142739	-0.105932	0.0414403	0.0229399	-0.0640038
	Grain 9	RMJG_009	0.000524892	3.35131	3.13969	32.3564	2.46457	2.45824	0.784971	1.4291e-05	1.06741	1.792e-05	10.3057	0.00012358	0.0779399	0.0364144	-0.017877	0.0396807
	Grain 10	RMJG_010	0.000521433	3.3783	3.16486	32.6163	2.48428	2.47953	0.784947	1.47393e-05	1.06743	1.81466e-05	10.3057	0.000113804	0.00931958	0.0375553	0.0481596	0.0107165
	Grain 11	RMJG_011	0.000514088	3.35506	3.1433	32.3928	2.46719	2.46252	0.784908	1.63879e-05	1.06736	1.87194e-05	10.3054	0.000125053	0.0403715	0.0417591	-0.11117	0.00790272
	Grain 12	RMJG_012	0.000547153	3.34037	3.12907	32.2448	2.45569	2.45031	0.784806	1.69149e-05	1.06752	1.80761e-05	10.3049	0.000153817	-0.105326	0.0431013	0.110414	-0.0316402
	Grain 13	RMJG_013	0.00122684	3.20732	3.00463	30.9627	2.35823	2.35303	0.784869	1.279e-05	1.06744	1.65667e-05	10.3051	0.00012801	0.0799036	0.0325939	-0.0473843	0.0278718
	Grain 14	RMJG_014	0.000523367	3.34638	3.13487	32.3037	2.46029	2.45481	0.784807	1.33221e-05	1.06747	2.17949e-05	10.3047	0.000131118	-0.130575	0.0339456	0.0639814	-0.0483392
	Grain 15	RMJG_015	0.000511864	3.4404	3.22323	33.2162	2.53004	2.52682	0.78495	1.33908e-05	1.06736	1.52335e-05	10.3053	0.000120284	0.0888708	0.0341218	-0.0607583	0.0172933
	Grain 16	RMJG_016	0.000524634	3.40964	3.19442	32.9206	2.50746	2.50278	0.784953	1.47032e-05	1.06738	1.72082e-05	10.3055	0.000129304	0.032301	0.0374638	-0.0092146	0.0287243
	Grain 17	RMJG_017	0.000521581	3.42235	3.20623	33.0407	2.51655	2.5117	0.784906	1.30192e-05	1.06742	1.66206e-05	10.3052	0.000133661	-0.0643899	0.0331719	0.0341163	-0.0290709
	Grain 18	RMJG_018	0.000508374	3.3569	3.145	32.4109	2.46867	2.46416	0.78496	1.16891e-05	1.06739	1.85369e-05	10.3055	0.000147226	0.0596039	0.0297846	0.0104952	0.00774703
	Grain 19	RMJG_019	0.000531866	3.34299	3.13207	32.2775	2.45841	2.45397	0.78492	1.6034e-05	1.06733	1.98641e-05	10.3056	0.000139889	-0.0634775	0.0408526	-0.014524	-0.00362222
	Grain 20	RMJG_020	0.000523697	3.32818	3.11829	32.1363	2.44781	2.44341	0.784979	1.58458e-05	1.06731	1.72767e-05	10.3057	0.000135893	0.0268048	0.0403736	-0.0431222	-0.0127329
	Grain 21	RMJG_021	0.000518037	3.35658	3.14471	32.4096	2.46858	2.46424	0.784997	1.80596e-05	1.06737	1.90362e-05	10.3062	0.000131783
2021-05-29	Grain 1	RMJG_001	0.000269156	3.1686	2.96836	30.5893	2.32978	2.32513	0.784877	1.66921e-05	1.06745	1.37104e-05	10.3052	0.000137445
	Grain 2	RMJG_002	0.00027683	3.15711	2.95764	30.478	2.3213	2.31653	0.784844	1.44652e-05	1.06745	2.03434e-05	10.3049	0.000159159	-0.0156783	0.0368607	-0.016395	-0.0141031
	Grain 3	RMJG_003	0.000265727	3.1603	2.96058	30.5085	2.32358	2.31876	0.784836	1.30567e-05	1.06748	2.04116e-05	10.305	0.000132358	-0.0555473	0.0332706	0.0608584	-0.0262732
	Grain 4	RMJG_004	0.000269258	3.15136	2.9524	30.4257	2.3174	2.31157	0.784915	1.71006e-05	1.06738	1.76689e-05	10.3055	0.000137809	0.0569263	0.0435757	-0.0520732	0.040829
	Grain 5	RMJG_005	0.000288882	3.13218	2.93442	30.2401	2.30328	2.29747	0.784905	1.51904e-05	1.06739	1.48865e-05	10.3053	0.000126868	-0.023869	0.0387056	-0.00909155	-0.016765
	Grain 6	RMJG_006	0.000281921	3.13547	2.93743	30.2714	2.30569	2.29986	0.784932	1.51414e-05	1.06742	1.94506e-05	10.3054	0.000136512	0.0293904	0.0385812	0.0315789	0.020298
	Grain 7	RMJG_007	0.00027931	3.14067	2.94241	30.322	2.30954	2.3037	0.784913	1.55741e-05	1.06738	2.13719e-05	10.3051	0.000151002	-0.00804042	0.0396832	0.00779133	-0.0272921
	Grain 8	RMJG_008	0.000273531	3.09566	2.90035	29.8892	2.2765	2.27249	0.784907	1.36189e-05	1.06733	1.96991e-05	10.3053	0.000121025	-0.0125673	0.0347015	-0.0550326	0.00383332
	Grain 9	RMJG_009	0.000274308	3.10506	2.90903	29.9789	2.28341	2.27933	0.78492	1.3471e-05	1.06739	1.87656e-05	10.3055	0.000119837	0.00842438	0.0343248	0.0264256	0.0170173
	Grain 10	RMJG_010	0.000280128	3.11875	2.9218	30.1097	2.29335	2.28922	0.78492	1.46603e-05	1.0674	1.76442e-05	10.3053	0.000122214	0.072178	0.0373576	-0.0352376	0.028419
	Grain 11	RMJG_011	0.000437099	3.06252	2.86895	29.5631	2.2516	2.24672	0.784807	1.4205e-05	1.06748	2.15402e-05	10.3045	0.000112652	-0.0931653	0.0361966	0.046286	-0.058554
	Grain 12	RMJG_012	0.000345258	3.12112	2.92387	30.1301	2.29473	2.28952	0.78484	1.41218e-05	1.06747	1.71833e-05	10.3049	0.000123393	0.0115444	0.035987	0.0126291	0.0353217
	Grain 13	RMJG_013	0.00026602	3.14689	2.94814	30.3791	2.31385	2.30867	0.784855	1.42175e-05	1.06742	1.72686e-05	10.3046	0.000132875	0.0184369	0.0362303	-0.0261499	-0.0302912
	Grain 14	RMJG_014	0.00028262	3.13381	2.93584	30.2538	2.3042	2.29954	0.784841	1.75324e-05	1.06744	2.27197e-05	10.3049	0.000147721	-0.0550372	0.044675	0.0245846	-0.00129155
	Grain 15	RMJG_015	0.000269396	3.09385	2.8985	29.8699	2.27504	2.27172	0.784914	1.52386e-05	1.0674	2.06972e-05	10.3053	0.000123236	-0.0149953	0.0388282	-0.0105712	-0.0128406
	Grain 16	RMJG_016	0.00026813	3.0645	2.87105	29.5888	2.25379	2.25052	0.785009	1.55356e-05	1.06738	1.64758e-05	10.3059	0.000129051	0.0757531	0.0395837	0.00849684	0.0335686
	Grain 17	RMJG_017	0.000272007	3.09566	2.90036	29.8906	2.27671	2.27358	0.784987	1.36354e-05	1.06734	1.1817e-05	10.3058	0.0001353	0.0582237	0.0347425	-0.0283965	0.0440915
	Grain 18	RMJG_018	0.000322055	3.06708	2.87349	29.6109	2.2553	2.24996	0.784872	1.83625e-05	1.06737	1.7916e-05	10.3049	0.000150334	-0.138594	0.0467845	0.0116044	-0.0811401
	Grain 19	RMJG_019	0.000329685	3.13568	2.93775	30.2751	2.30604	2.30049	0.784975	1.47211e-05	1.06737	1.86577e-05	10.3055	0.000141081	0.100715	0.0375109	-0.00958209	0.0573886
	Grain 20	RMJG_020	0.000277953	3.13284	2.935	30.2454	2.30372	2.29812	0.784921	1.67707e-05	1.06739	1.79204e-05	10.3051	0.000133229	-0.0628021	0.0427295	0.0162334	-0.0520929
	Grain 21	RMJG_021	0.000264268	3.11315	2.91665	30.0582	2.28945	2.28452	0.784964	1.57109e-05	1.06738	1.85738e-05	10.3056	0.000133733
2021-05-29	Grain 1	RMJG_001	0.00028623	3.39588	3.18115	32.7818	2.49675	2.49185	0.784867	1.50423e-05	1.06748	1.85632e-05	10.3051	0.000139611
	Grain 2	RMJG_002	0.000298599	3.40557	3.19028	32.8743	2.50368	2.4977	0.784787	1.2498e-05	1.06748	1.69498e-05	10.3045	0.000115575	-0.101105	0.0318476	0.0090532	-0.0427643
	Grain 3	RMJG_003	0.000309171	3.35824	3.14593	32.4184	2.46911	2.46464	0.784865	1.481e-05	1.06746	2.02331e-05	10.3049	0.000119328	0.103315	0.0377428	-0.0177942	0.0365605
	Grain 4	RMJG_004	0.000287389	3.28964	3.08167	31.7545	2.41845	2.41416	0.784782	1.295e-05	1.06748	1.67463e-05	10.3044	0.000132198	-0.0660617	0.0330006	0.00292212	-0.0247432
	Grain 5	RMJG_005	0.000293597	3.34918	3.13745	32.33	2.46229	2.45787	0.784802	1.54086e-05	1.0675	1.67325e-05	10.3045	0.000123539	0.00268297	0.0392677	0.0166417	0.00200991
	Grain 6	RMJG_006	0.000306768	3.36485	3.15211	32.4814	2.47387	2.47025	0.784818	1.59461e-05	1.06748	1.61152e-05	10.3046	0.000116542	0.00224642	0.0406364	-0.0120657	0.000314485
	Grain 7	RMJG_007	0.000293305	3.37944	3.16578	32.622	2.48459	2.4809	0.784831	1.1357e-05	1.06748	1.7695e-05	10.3046	0.000122355	0.00729944	0.0289415	-0.0185752	-0.0131481
	Grain 8	RMJG_008	0.000294386	3.31945	3.1095	32.0427	2.44037	2.43683	0.784832	1.80884e-05	1.06753	1.74545e-05	10.3049	0.000163599	0.0430253	0.046097	0.0291944	0.0366543
	Grain 9	RMJG_009	0.000281574	3.37805	3.16446	32.6079	2.48332	2.4771	0.784766	1.39284e-05	1.06751	1.95942e-05	10.3044	0.000132488	-0.0547022	0.0354951	-0.000753776	-0.0204828
	Grain 10	RMJG_010	0.000322927	3.40914	3.19354	32.9079	2.50625	2.49993	0.784785	1.44835e-05	1.06749	1.70405e-05	10.3044	0.000143988	-0.0146326	0.0369103	-0.0159916	-0.0241533
	Grain 11	RMJG_011	0.000291673	3.43042	3.2135	33.1147	2.52205	2.51562	0.784827	1.44057e-05	1.06751	1.71876e-05	10.3049	0.000141261	-0.0316835	0.0367093	0.0275604	-0.0113634
	Grain 12	RMJG_012	0.000307514	3.52961	3.30654	34.0757	2.59538	2.5901	0.784919	1.40003e-05	1.06747	1.47815e-05	10.3056	0.000120291	0.0979152	0.0356768	-0.00130499	0.0655127
	Grain 13	RMJG_013	0.000304252	3.52195	3.29949	34	2.58963	2.58432	0.784858	1.57039e-05	1.06743	1.75104e-05	10.3049	0.000150834	-0.000609832	0.040017	-0.0406317	-0.0275458
	Grain 14	RMJG_014	0.000311059	3.53946	3.31576	34.1683	2.60224	2.59699	0.784797	1.35759e-05	1.06748	1.69517e-05	10.3049	0.000133351	-0.0745825	0.0345945	0.051952	-0.0159159
	Grain 15	RMJG_015	0.00029702	3.40065	3.18587	32.8307	2.50048	2.49654	0.784854	1.49912e-05	1.06741	1.71519e-05	10.3051	0.000119695	0.0472273	0.038203	-0.0568418	0.0217149
	Grain 16	RMJG_016	0.000292892	3.39602	3.18139	32.7837	2.49688	2.49306	0.784836	1.55173e-05	1.06747	1.75869e-05	10.3049	0.000131896	-0.036447	0.0395413	0.0666979	0.00631235
	Grain 17	RMJG_017	0.000303087	3.35879	3.14671	32.4256	2.46978	2.46407	0.784876	1.5056e-05	1.06739	1.73756e-05	10.3046	0.000131615	0.0689378	0.0383679	-0.0961829	-0.0198772
	Grain 18	RMJG_018	0.000293101	3.36808	3.1551	32.512	2.47612	2.4717	0.784807	1.21472e-05	1.06751	1.88931e-05	10.3047	0.000129623	-0.0779996	0.0309535	0.0692798	-0.0217692
	Grain 19	RMJG_019	0.000295121	3.37126	3.15816	32.5455	2.47875	2.47433	0.784861	1.66859e-05	1.06748	1.88767e-05	10.3052	0.000148733	0.031751	0.0425208	0.00333178	0.0526324
	Grain 20	RMJG_020	0.000409861	3.30502	3.0962	31.9037	2.43011	2.42568	0.784865	1.5522e-05	1.06745	1.75363e-05	10.3046	0.000150075	-0.0519676	0.0395513	0.00395971	-0.0533256
	Grain 21	RMJG_021	0.000300577	3.42361	3.20739	33.0529	2.51764	2.51332	0.78495	1.43656e-05	1.06741	2.05177e-05	10.3052	0.000111224
2021-05-29	Grain 1	RMJG_001	0.000317071	3.48259	3.26222	33.6144	2.55992	2.55352	0.784734	1.39471e-05	1.06754	1.65727e-05	10.3042	0.000144145
	Grain 2	RMJG_002	0.000296042	3.42018	3.20372	33.0117	2.51411	2.50782	0.784753	1.26974e-05	1.06756	2.15639e-05	10.3042	0.000137261	0.0145226	0.0323608	0.0028033	-0.0109452
	Grain 3	RMJG_003	0.000320453	3.45891	3.23996	33.3857	2.54255	2.53616	0.784748	1.81051e-05	1.06757	1.87199e-05	10.3044	0.000154232	-0.0166756	0.0461416	0.039536	0.0155092
	Grain 4	RMJG_004	0.000323267	3.42255	3.20612	33.0366	2.51602	2.50982	0.78477	1.6574e-05	1.0675	1.80591e-05	10.3043	0.000144611	0.0371549	0.0422406	-0.0443056	0.00401138
	Grain 5	RMJG_005	0.000308465	3.50421	3.28258	33.8239	2.57597	2.56892	0.784733	1.41936e-05	1.06752	1.76065e-05	10.3041	0.00014611	-0.0349516	0.036173	-0.0280084	-0.0157107
	Grain 6	RMJG_006	0.000305411	3.4984	3.27687	33.7655	2.57151	2.56432	0.784752	1.64537e-05	1.0676	1.81867e-05	10.3043	0.000133122	-0.0239045	0.0419325	0.0804107	0.00354091
	Grain 7	RMJG_007	0.000297565	3.37094	3.15772	32.5383	2.47817	2.4734	0.784808	1.42713e-05	1.06751	1.79869e-05	10.3043	0.000127113	0.107466	0.0363728	-0.0620778	0.0275851
	Grain 8	RMJG_008	0.000290711	3.33394	3.12298	32.1784	2.45059	2.44457	0.784695	1.51968e-05	1.06755	1.76597e-05	10.3038	0.000120825	-0.0790344	0.0387301	0.0144117	-0.0307259
	Grain 9	RMJG_009	0.000344811	3.3856	3.17133	32.6773	2.48858	2.48251	0.784706	1.35448e-05	1.06757	1.58365e-05	10.304	0.000127716	0.0254783	0.0345228	0.0145626	0.0265269
	Grain 10	RMJG_010	0.000311269	3.19026	2.98839	30.7913	2.3449	2.34048	0.784677	1.34468e-05	1.06755	1.74832e-05	10.3036	0.000159523	-0.0734159	0.034271	0.0144933	-0.0545161
	Grain 11	RMJG_011	0.000291943	3.36531	3.15254	32.4847	2.474	2.46773	0.784764	1.63982e-05	1.0675	2.03326e-05	10.3043	0.000141082	0.0317302	0.0417928	-0.0235617	0.0258216
	Grain 12	RMJG_012	0.000308125	3.44428	3.22648	33.2476	2.53214	2.52574	0.784801	1.46164e-05	1.0675	2.12706e-05	10.3045	0.000127938	-0.0306024	0.0372476	0.0386072	-0.0199795
	Grain 13	RMJG_013	0.000303905	3.3661	3.15348	32.4968	2.47514	2.46996	0.784885	1.46071e-05	1.06741	2.04811e-05	10.3051	0.000154271	0.0418357	0.0372226	-0.0360385	0.020284
	Grain 14	RMJG_014	0.00041478	3.34181	3.13079	32.2634	2.45734	2.45237	0.784904	1.77097e-05	1.06741	1.85231e-05	10.3052	0.000166214	0.00701276	0.045126	-0.0344448	0.00840937
	Grain 15	RMJG_015	0.000295497	3.35457	3.14257	32.385	2.46664	2.46155	0.784912	1.5361e-05	1.06748	1.44877e-05	10.3053	0.000121635	0.0566906	0.0391429	0.029733	0.0279975
	Grain 16	RMJG_016	0.000304054	3.39786	3.18309	32.8007	2.49817	2.49291	0.784831	1.46215e-05	1.06748	1.88678e-05	10.3047	0.000141746	-0.0930828	0.0372568	0.0227334	-0.059705
	Grain 17	RMJG_017	0.000300726	3.39888	3.18415	32.8134	2.49922	2.49351	0.784897	1.27822e-05	1.06744	1.74267e-05	10.3053	0.000119012	0.0174649	0.0325711	0.012308	0.039982
	Grain 18	RMJG_018	0.000292014	3.37119	3.15841	32.5481	2.47916	2.4735	0.784934	1.15669e-05	1.06737	1.47691e-05	10.3052	0.000114589	0.0442715	0.0294737	-0.0608545	0.0119108
	Grain 19	RMJG_019	0.000312451	3.39143	3.17724	32.7409	2.49379	2.49058	0.784903	1.51084e-05	1.06743	2.11704e-05	10.3048	0.000131344	-0.01031	0.0384972	-0.00527661	-0.0491048
	Grain 20	RMJG_020	0.000307455	3.43789	3.22051	33.1888	2.5278	2.52449	0.784887	1.35084e-05	1.0675	1.72233e-05	10.3054	0.000115538	0.0554501	0.0344232	0.0118964	0.0692295
	Grain 21	RMJG_021	0.000300894	3.44121	3.22347	33.2162	2.52974	2.52391	0.784784	1.55645e-05	1.06754	1.73632e-05	10.3045	0.00012789
2021-05-29	Grain 1	RMJG_001	0.000330651	3.65517	3.424	35.2824	2.68707	2.68071	0.784775	1.22596e-05	1.06752	1.62054e-05	10.3044	0.000106769
	Grain 2	RMJG_002	0.000320936	3.6219	3.39314	34.9664	2.66321	2.6574	0.784871	1.46121e-05	1.06741	1.84687e-05	10.305	0.000128457	0.0163954	0.0372349	-0.0488967	0.00636435
	Grain 3	RMJG_003	0.000313244	3.69216	3.45903	35.647	2.71516	2.70944	0.784942	1.5627e-05	1.06741	1.51066e-05	10.3055	0.00011282	0.133155	0.0398223	-0.0270797	0.0711724
	Grain 4	RMJG_004	0.000318001	3.60392	3.37618	34.7904	2.64964	2.64228	0.784804	1.33721e-05	1.06746	1.86856e-05	10.3044	0.00011776	-0.133605	0.0340731	0.0446486	-0.068212
	Grain 5	RMJG_005	0.000316525	3.57769	3.35172	34.5393	2.63067	2.62341	0.784876	1.42574e-05	1.06742	1.75843e-05	10.3049	0.000118139	0.00746541	0.0363305	-0.004432	0.00174075
	Grain 6	RMJG_006	0.00032574	3.58138	3.35529	34.5774	2.63369	2.62647	0.784936	1.24419e-05	1.06739	1.46451e-05	10.3052	0.000110176	0.0818355	0.0317044	-0.0368218	0.0211393
	Grain 7	RMJG_007	0.000381623	3.87413	3.62932	37.4007	2.84854	2.84121	0.784868	1.41304e-05	1.06744	1.73188e-05	10.3052	0.000121463	-0.0357739	0.0360058	0.0323096	0.0191625
	Grain 8	RMJG_008	0.000333873	3.83267	3.59062	37.0005	2.81811	2.81076	0.784855	1.38622e-05	1.06742	1.71101e-05	10.3047	0.000103614	-0.0381593	0.0353229	0.022625	-0.0379615
	Grain 9	RMJG_009	0.000416868	3.66033	3.42941	35.3405	2.69179	2.68444	0.784903	1.52497e-05	1.06735	1.8626e-05	10.305	0.000123219	-0.00139944	0.0388575	-0.0422414	-0.0189007
	Grain 10	RMJG_010	0.000327084	3.66489	3.43358	35.3851	2.69519	2.68791	0.784953	1.31226e-05	1.06737	1.73037e-05	10.3057	0.000132327	0.0249435	0.0334363	0.0128317	0.0320898
	Grain 11	RMJG_011	0.000312288	3.63629	3.40681	35.1096	2.67423	2.66707	0.784963	1.20436e-05	1.06736	1.56372e-05	10.3058	0.000114469	-0.0223108	0.030685	0.000642896	-0.000573202
	Grain 12	RMJG_012	0.000329223	3.70453	3.47079	35.7695	2.72458	2.71978	0.785009	1.35198e-05	1.06735	1.26374e-05	10.3058	0.000100412	0.0486134	0.0344467	-0.0218397	0.00019572
	Grain 13	RMJG_013	0.000310238	3.59073	3.36406	34.6692	2.64071	2.63629	0.784979	1.22727e-05	1.06739	1.26415e-05	10.3059	0.000112452	-0.0234111	0.0312682	0.0553218	0.0206081
	Grain 14	RMJG_014	0.000307753	3.54557	3.32199	34.2352	2.60774	2.60335	0.784985	1.44268e-05	1.06731	1.87992e-05	10.3055	0.000117983	-0.0101304	0.0367565	-0.0493277	-0.0275595
	Grain 15	RMJG_015	0.000310644	3.64742	3.4173	35.2178	2.68259	2.67768	0.785007	1.38868e-05	1.06734	1.78675e-05	10.3057	0.000117201	0.039067	0.0353815	0.015877	0.0176485
	Grain 16	RMJG_016	0.000318646	3.63677	3.40737	35.1149	2.67469	2.66981	0.784967	1.48929e-05	1.06733	1.76771e-05	10.3056	0.000111852	-0.0378642	0.0379439	-0.0170628	-0.0208734
	Grain 17	RMJG_017	0.000338426	3.68929	3.45649	35.6215	2.71327	2.70832	0.784987	1.31388e-05	1.06736	1.67734e-05	10.3058	0.000120875	0.102447	0.0334786	-0.0424189	0.0613488
	Grain 18	RMJG_018	0.000376368	4.11986	3.85944	39.7709	3.02904	3.02052	0.784847	1.21635e-05	1.06748	1.36059e-05	10.3048	0.000100156	-0.0796332	0.0309933	0.0417051	-0.0382251
	Grain 19	RMJG_019	0.000343255	3.96126	3.7108	38.2387	2.91235	2.90418	0.784831	1.33979e-05	1.06751	1.82761e-05	10.3046	0.000135065	-0.102466	0.0341386	0.093356	-0.0630239
	Grain 20	RMJG_020	0.000309168	3.54718	3.32341	34.25	2.60883	2.60235	0.784976	1.41253e-05	1.06734	1.66718e-05	10.3057	0.000142178	0.0426391	0.0359907	-0.0713969	0.0210213
	Grain 21	RMJG_021	0.000316291	3.59929	3.37228	34.7557	2.64745	2.64043	0.785055	1.43008e-05	1.06732	1.56928e-05	10.3064	0.000143446

## Sheet: PlotDat8
Source sheet	PZH12-15	-0.2	5.46976e-05	-0.12	0	-0.2	0
Plot name	ProbDens7	-0.1998	5.67732e-05	-0.106667	0	0.1998	0
Plot Type	16	-0.1996	5.89233e-05	-0.106667	2
1st free col	9	-0.1994	6.11501e-05	-0.12	2
Sigma Level	2	-0.1992	6.34565e-05	-0.12	0
Absolute Errs	TRUE	-0.199	6.58449e-05	ErrBox	ErrBox
Symbol Type	1	-0.1988	6.83181e-05	-0.106667	0
Inverse Plot	FALSE	-0.1986	7.08865e-05	-0.0933333	0
Color Plot	TRUE	-0.1984	7.35384e-05	-0.0933333	1
3D plot	FALSE	-0.1982	7.62838e-05	-0.106667	1
Linear	FALSE	-0.198	7.91331e-05	-0.106667	0
Data Range	Q4:R152	-0.1978	8.20755e-05	ErrBox	ErrBox
Filled Symbols	FALSE	-0.1976	8.5121e-05	-0.0933333	0
ConcAge	FALSE	-0.1974	8.8273e-05	-0.08	0
ConcSwap	FALSE	-0.1972	9.1535e-05	-0.08	2
1st Symbol-row	1	-0.197	9.49105e-05	-0.0933333	2
		-0.1968	9.84032e-05	-0.0933333	0
		-0.1966	0.000102024	ErrBox	ErrBox
		-0.1964	0.000105763	-0.08	0
		-0.1962	0.000109631	-0.0666667	0
		-0.196	0.000113632	-0.0666667	4
		-0.1958	0.000117771	-0.08	4
		-0.1956	0.000122058	-0.08	0
		-0.1954	0.000126485	ErrBox	ErrBox
		-0.1952	0.000131063	-0.0666667	0
		-0.195	0.000135796	-0.0533333	0
		-0.1948	0.00014069	-0.0533333	5
		-0.1946	0.00014575	-0.0666667	5
		-0.1944	0.00015098	-0.0666667	0
		-0.1942	0.000156387	ErrBox	ErrBox
		-0.194	0.000161975	-0.0533333	0
		-0.1938	0.000167751	-0.04	0
		-0.1936	0.00017372	-0.04	10
		-0.1934	0.000179889	-0.0533333	10
		-0.1932	0.000186262	-0.0533333	0
		-0.193	0.000192848	ErrBox	ErrBox
		-0.1928	0.000199652	-0.04	0
		-0.1926	0.00020668	-0.0266667	0
		-0.1924	0.000213941	-0.0266667	14
		-0.1922	0.00022144	-0.04	14
		-0.192	0.000229193	-0.04	0
		-0.1918	0.000237193	ErrBox	ErrBox
		-0.1916	0.000245453	-0.0266667	0
		-0.1914	0.000253983	-0.0133333	0
		-0.1912	0.000262791	-0.0133333	12
		-0.191	0.000271884	-0.0266667	12
		-0.1908	0.000281271	-0.0266667	0
		-0.1906	0.000290961	ErrBox	ErrBox
		-0.1904	0.000300962	-0.0133333	0
		-0.1902	0.000311285	-1.73472e-18	0
		-0.19	0.000321939	-1.73472e-18	15
		-0.1898	0.000332933	-0.0133333	15
		-0.1896	0.000344277	-0.0133333	0
		-0.1894	0.000355982	ErrBox	ErrBox
		-0.1892	0.000368058	0	0
		-0.189	0.000380516	0.0133333	0
		-0.1888	0.000393367	0.0133333	18
		-0.1886	0.000406623	0	18
		-0.1884	0.000420295	0	0
		-0.1882	0.000434402	ErrBox	ErrBox
		-0.188	0.000448943	0.0133333	0
		-0.1878	0.000463944	0.0266667	0
		-0.1876	0.000479404	0.0266667	19
		-0.1874	0.000495343	0.0133333	19
		-0.1872	0.000511775	0.0133333	0
		-0.187	0.000528714	ErrBox	ErrBox
		-0.1868	0.000546173	0.0266667	0
		-0.1866	0.000564168	0.04	0
		-0.1864	0.000582714	0.04	15
		-0.1862	0.000601825	0.0266667	15
		-0.186	0.000621519	0.0266667	0
		-0.1858	0.00064181	ErrBox	ErrBox
		-0.1856	0.000662715	0.04	0
		-0.1854	0.000684252	0.0533333	0
		-0.1852	0.000706437	0.0533333	6
		-0.185	0.000729289	0.04	6
		-0.1848	0.000752832	0.04	0
		-0.1846	0.000777072	ErrBox	ErrBox
		-0.1844	0.000802034	0.0533333	0
		-0.1842	0.000827737	0.0666667	0
		-0.184	0.000854202	0.0666667	2
		-0.1838	0.00088145	0.0533333	2
		-0.1836	0.0009095	0.0533333	0
		-0.1834	0.000938375	ErrBox	ErrBox
		-0.1832	0.000968097	0.0666667	0
		-0.183	0.000998687	0.08	0
		-0.1828	0.00103018	0.08	4
		-0.1826	0.00106258	0.0666667	4
		-0.1824	0.00109592	0.0666667	0
		-0.1822	0.00113022	ErrBox	ErrBox
		-0.182	0.00116551	0.08	0
		-0.1818	0.00120181	0.0933333	0
		-0.1816	0.00123916	0.0933333	5
		-0.1814	0.00127757	0.08	5
		-0.1812	0.00131708	0.08	0
		-0.181	0.00135771	ErrBox	ErrBox
		-0.1808	0.00139949	0.0933333	0
		-0.1806	0.00144246	0.106667	0
		-0.1804	0.00148663	0.106667	1
		-0.1802	0.00153204	0.0933333	1
		-0.18	0.00157873	0.0933333	0
		-0.1798	0.00162672	ErrBox	ErrBox
		-0.1796	0.00167605	0.106667	0
		-0.1794	0.00172675	0.12	0
		-0.1792	0.00177885	0.12	3
		-0.179	0.0018324	0.106667	3
		-0.1788	0.00188742	0.106667	0
		-0.1786	0.00194394	ErrBox	ErrBox
		-0.1784	0.00200201
		-0.1782	0.00206167
		-0.178	0.00212295
		-0.1778	0.00218589
		-0.1776	0.00225053
		-0.1774	0.00231692
		-0.1772	0.00238509
		-0.177	0.00245508
		-0.1768	0.00252695
		-0.1766	0.00260073
		-0.1764	0.00267647
		-0.1762	0.00275421
		-0.176	0.002834
		-0.1758	0.00291589
		-0.1756	0.00299993
		-0.1754	0.00308616
		-0.1752	0.00317464
		-0.175	0.00326541
		-0.1748	0.00335854
		-0.1746	0.00345407
		-0.1744	0.00355205
		-0.1742	0.00365254
		-0.174	0.00375561
		-0.1738	0.00386129
		-0.1736	0.00396966
		-0.1734	0.00408077
		-0.1732	0.00419469
		-0.173	0.00431148
		-0.1728	0.00443118
		-0.1726	0.00455387
		-0.1724	0.00467961
		-0.1722	0.00480847
		-0.172	0.00494052
		-0.1718	0.00507582
		-0.1716	0.00521443
		-0.1714	0.00535644
		-0.1712	0.00550191
		-0.171	0.00565091
		-0.1708	0.00580352
		-0.1706	0.00595981
		-0.1704	0.00611986
		-0.1702	0.00628374
		-0.17	0.00645154
		-0.1698	0.00662333
		-0.1696	0.00679919
		-0.1694	0.0069792
		-0.1692	0.00716345
		-0.169	0.00735202
		-0.1688	0.00754499
		-0.1686	0.00774245
		-0.1684	0.0079445
		-0.1682	0.00815122
		-0.168	0.00836269
		-0.1678	0.00857901
		-0.1676	0.00880028
		-0.1674	0.00902658
		-0.1672	0.00925802
		-0.167	0.00949468
		-0.1668	0.00973667
		-0.1666	0.00998409
		-0.1664	0.010237
		-0.1662	0.0104956
		-0.166	0.0107599
		-0.1658	0.0110301
		-0.1656	0.0113062
		-0.1654	0.0115883
		-0.1652	0.0118766
		-0.165	0.0121712
		-0.1648	0.0124721
		-0.1646	0.0127796
		-0.1644	0.0130936
		-0.1642	0.0134144
		-0.164	0.013742
		-0.1638	0.0140765
		-0.1636	0.0144181
		-0.1634	0.0147669
		-0.1632	0.0151231
		-0.163	0.0154866
		-0.1628	0.0158578
		-0.1626	0.0162366
		-0.1624	0.0166232
		-0.1622	0.0170178
		-0.162	0.0174204
		-0.1618	0.0178313
		-0.1616	0.0182505
		-0.1614	0.0186781
		-0.1612	0.0191143
		-0.161	0.0195593
		-0.1608	0.0200131
		-0.1606	0.020476
		-0.1604	0.020948
		-0.1602	0.0214293
		-0.16	0.02192
		-0.1598	0.0224203
		-0.1596	0.0229303
		-0.1594	0.0234502
		-0.1592	0.0239801
		-0.159	0.0245201
		-0.1588	0.0250704
		-0.1586	0.0256312
		-0.1584	0.0262026
		-0.1582	0.0267847
		-0.158	0.0273778
		-0.1578	0.0279819
		-0.1576	0.0285972
		-0.1574	0.0292238
		-0.1572	0.029862
		-0.157	0.0305119
		-0.1568	0.0311736
		-0.1566	0.0318473
		-0.1564	0.0325332
		-0.1562	0.0332314
		-0.156	0.0339421
		-0.1558	0.0346654
		-0.1556	0.0354015
		-0.1554	0.0361506
		-0.1552	0.0369128
		-0.155	0.0376883
		-0.1548	0.0384773
		-0.1546	0.0392798
		-0.1544	0.0400962
		-0.1542	0.0409266
		-0.154	0.0417711
		-0.1538	0.0426298
		-0.1536	0.0435031
		-0.1534	0.044391
		-0.1532	0.0452937
		-0.153	0.0462113
		-0.1528	0.0471441
		-0.1526	0.0480923
		-0.1524	0.0490559
		-0.1522	0.0500351
		-0.152	0.0510303
		-0.1518	0.0520414
		-0.1516	0.0530686
		-0.1514	0.0541123
		-0.1512	0.0551724
		-0.151	0.0562493
		-0.1508	0.057343
		-0.1506	0.0584537
		-0.1504	0.0595816
		-0.1502	0.0607269
		-0.15	0.0618898
		-0.1498	0.0630703
		-0.1496	0.0642688
		-0.1494	0.0654853
		-0.1492	0.0667201
		-0.149	0.0679732
		-0.1488	0.069245
		-0.1486	0.0705354
		-0.1484	0.0718448
		-0.1482	0.0731732
		-0.148	0.0745209
		-0.1478	0.075888
		-0.1476	0.0772746
		-0.1474	0.078681
		-0.1472	0.0801073
		-0.147	0.0815537
		-0.1468	0.0830203
		-0.1466	0.0845072
		-0.1464	0.0860148
		-0.1462	0.087543
		-0.146	0.0890921
		-0.1458	0.0906622
		-0.1456	0.0922535
		-0.1454	0.0938662
		-0.1452	0.0955003
		-0.145	0.0971561
		-0.1448	0.0988337
		-0.1446	0.100533
		-0.1444	0.102255
		-0.1442	0.103999
		-0.144	0.105765
		-0.1438	0.107554
		-0.1436	0.109365
		-0.1434	0.111199
		-0.1432	0.113056
		-0.143	0.114937
		-0.1428	0.11684
		-0.1426	0.118767
		-0.1424	0.120717
		-0.1422	0.122691
		-0.142	0.124689
		-0.1418	0.12671
		-0.1416	0.128756
		-0.1414	0.130826
		-0.1412	0.13292
		-0.141	0.135038
		-0.1408	0.13718
		-0.1406	0.139348
		-0.1404	0.14154
		-0.1402	0.143756
		-0.14	0.145998
		-0.1398	0.148265
		-0.1396	0.150556
		-0.1394	0.152873
		-0.1392	0.155216
		-0.139	0.157583
		-0.1388	0.159976
		-0.1386	0.162395
		-0.1384	0.164839
		-0.1382	0.167309
		-0.138	0.169805
		-0.1378	0.172327
		-0.1376	0.174874
		-0.1374	0.177448
		-0.1372	0.180048
		-0.137	0.182674
		-0.1368	0.185326
		-0.1366	0.188004
		-0.1364	0.190709
		-0.1362	0.19344
		-0.136	0.196198
		-0.1358	0.198982
		-0.1356	0.201792
		-0.1354	0.204629
		-0.1352	0.207493
		-0.135	0.210384
		-0.1348	0.213301
		-0.1346	0.216244
		-0.1344	0.219215
		-0.1342	0.222212
		-0.134	0.225236
		-0.1338	0.228287
		-0.1336	0.231364
		-0.1334	0.234468
		-0.1332	0.237599
		-0.133	0.240757
		-0.1328	0.243942
		-0.1326	0.247154
		-0.1324	0.250392
		-0.1322	0.253657
		-0.132	0.256949
		-0.1318	0.260267
		-0.1316	0.263612
		-0.1314	0.266984
		-0.1312	0.270383
		-0.131	0.273808
		-0.1308	0.27726
		-0.1306	0.280739
		-0.1304	0.284244
		-0.1302	0.287775
		-0.13	0.291333
		-0.1298	0.294917
		-0.1296	0.298528
		-0.1294	0.302165
		-0.1292	0.305828
		-0.129	0.309518
		-0.1288	0.313233
		-0.1286	0.316975
		-0.1284	0.320742
		-0.1282	0.324536
		-0.128	0.328355
		-0.1278	0.3322
		-0.1276	0.336071
		-0.1274	0.339967
		-0.1272	0.343889
		-0.127	0.347837
		-0.1268	0.35181
		-0.1266	0.355808
		-0.1264	0.359831
		-0.1262	0.36388
		-0.126	0.367953
		-0.1258	0.372051
		-0.1256	0.376175
		-0.1254	0.380323
		-0.1252	0.384495
		-0.125	0.388692
		-0.1248	0.392914
		-0.1246	0.39716
		-0.1244	0.40143
		-0.1242	0.405724
		-0.124	0.410042
		-0.1238	0.414385
		-0.1236	0.418751
		-0.1234	0.423141
		-0.1232	0.427554
		-0.123	0.431991
		-0.1228	0.436451
		-0.1226	0.440935
		-0.1224	0.445441
		-0.1222	0.449971
		-0.122	0.454524
		-0.1218	0.4591
		-0.1216	0.463698
		-0.1214	0.46832
		-0.1212	0.472964
		-0.121	0.47763
		-0.1208	0.482318
		-0.1206	0.487029
		-0.1204	0.491763
		-0.1202	0.496518
		-0.12	0.501295
		-0.1198	0.506094
		-0.1196	0.510916
		-0.1194	0.515758
		-0.1192	0.520623
		-0.119	0.525509
		-0.1188	0.530417
		-0.1186	0.535346
		-0.1184	0.540296
		-0.1182	0.545268
		-0.118	0.550261
		-0.1178	0.555276
		-0.1176	0.560311
		-0.1174	0.565368
		-0.1172	0.570446
		-0.117	0.575544
		-0.1168	0.580664
		-0.1166	0.585805
		-0.1164	0.590966
		-0.1162	0.596149
		-0.116	0.601352
		-0.1158	0.606577
		-0.1156	0.611822
		-0.1154	0.617088
		-0.1152	0.622375
		-0.115	0.627683
		-0.1148	0.633011
		-0.1146	0.638361
		-0.1144	0.643732
		-0.1142	0.649123
		-0.114	0.654536
		-0.1138	0.65997
		-0.1136	0.665425
		-0.1134	0.670901
		-0.1132	0.676398
		-0.113	0.681917
		-0.1128	0.687457
		-0.1126	0.693019
		-0.1124	0.698602
		-0.1122	0.704207
		-0.112	0.709834
		-0.1118	0.715483
		-0.1116	0.721154
		-0.1114	0.726847
		-0.1112	0.732562
		-0.111	0.7383
		-0.1108	0.744061
		-0.1106	0.749844
		-0.1104	0.75565
		-0.1102	0.76148
		-0.11	0.767333
		-0.1098	0.773209
		-0.1096	0.779109
		-0.1094	0.785033
		-0.1092	0.790981
		-0.109	0.796954
		-0.1088	0.802951
		-0.1086	0.808973
		-0.1084	0.815021
		-0.1082	0.821093
		-0.108	0.827192
		-0.1078	0.833316
		-0.1076	0.839466
		-0.1074	0.845643
		-0.1072	0.851846
		-0.107	0.858077
		-0.1068	0.864335
		-0.1066	0.870621
		-0.1064	0.876935
		-0.1062	0.883277
		-0.106	0.889647
		-0.1058	0.896047
		-0.1056	0.902476
		-0.1054	0.908935
		-0.1052	0.915424
		-0.105	0.921943
		-0.1048	0.928493
		-0.1046	0.935075
		-0.1044	0.941687
		-0.1042	0.948332
		-0.104	0.955009
		-0.1038	0.961719
		-0.1036	0.968462
		-0.1034	0.975239
		-0.1032	0.982049
		-0.103	0.988894
		-0.1028	0.995774
		-0.1026	1.00269
		-0.1024	1.00964
		-0.1022	1.01663
		-0.102	1.02365
		-0.1018	1.03071
		-0.1016	1.03781
		-0.1014	1.04494
		-0.1012	1.05211
		-0.101	1.05933
		-0.1008	1.06658
		-0.1006	1.07387
		-0.1004	1.0812
		-0.1002	1.08857
		-0.1	1.09598
		-0.0998	1.10344
		-0.0996	1.11093
		-0.0994	1.11847
		-0.0992	1.12605
		-0.099	1.13367
		-0.0988	1.14134
		-0.0986	1.14905
		-0.0984	1.1568
		-0.0982	1.1646
		-0.098	1.17245
		-0.0978	1.18034
		-0.0976	1.18828
		-0.0974	1.19626
		-0.0972	1.20429
		-0.097	1.21237
		-0.0968	1.22049
		-0.0966	1.22867
		-0.0964	1.23689
		-0.0962	1.24516
		-0.096	1.25348
		-0.0958	1.26185
		-0.0956	1.27027
		-0.0954	1.27874
		-0.0952	1.28726
		-0.095	1.29584
		-0.0948	1.30446
		-0.0946	1.31314
		-0.0944	1.32186
		-0.0942	1.33064
		-0.094	1.33948
		-0.0938	1.34836
		-0.0936	1.3573
		-0.0934	1.3663
		-0.0932	1.37534
		-0.093	1.38444
		-0.0928	1.3936
		-0.0926	1.40281
		-0.0924	1.41208
		-0.0922	1.4214
		-0.092	1.43077
		-0.0918	1.4402
		-0.0916	1.44969
		-0.0914	1.45923
		-0.0912	1.46883
		-0.091	1.47849
		-0.0908	1.4882
		-0.0906	1.49797
		-0.0904	1.50779
		-0.0902	1.51768
		-0.09	1.52762
		-0.0898	1.53761
		-0.0896	1.54767
		-0.0894	1.55778
		-0.0892	1.56795
		-0.089	1.57817
		-0.0888	1.58845
		-0.0886	1.59879
		-0.0884	1.60919
		-0.0882	1.61965
		-0.088	1.63016
		-0.0878	1.64073
		-0.0876	1.65136
		-0.0874	1.66204
		-0.0872	1.67279
		-0.087	1.68358
		-0.0868	1.69444
		-0.0866	1.70536
		-0.0864	1.71633
		-0.0862	1.72736
		-0.086	1.73844
		-0.0858	1.74958
		-0.0856	1.76078
		-0.0854	1.77204
		-0.0852	1.78335
		-0.085	1.79472
		-0.0848	1.80614
		-0.0846	1.81762
		-0.0844	1.82916
		-0.0842	1.84075
		-0.084	1.8524
		-0.0838	1.8641
		-0.0836	1.87586
		-0.0834	1.88767
		-0.0832	1.89953
		-0.083	1.91145
		-0.0828	1.92343
		-0.0826	1.93546
		-0.0824	1.94754
		-0.0822	1.95968
		-0.082	1.97187
		-0.0818	1.98411
		-0.0816	1.9964
		-0.0814	2.00875
		-0.0812	2.02115
		-0.081	2.0336
		-0.0808	2.0461
		-0.0806	2.05866
		-0.0804	2.07126
		-0.0802	2.08392
		-0.08	2.09662
		-0.0798	2.10938
		-0.0796	2.12218
		-0.0794	2.13504
		-0.0792	2.14795
		-0.079	2.1609
		-0.0788	2.1739
		-0.0786	2.18695
		-0.0784	2.20005
		-0.0782	2.2132
		-0.078	2.2264
		-0.0778	2.23964
		-0.0776	2.25293
		-0.0774	2.26627
		-0.0772	2.27965
		-0.077	2.29308
		-0.0768	2.30655
		-0.0766	2.32007
		-0.0764	2.33364
		-0.0762	2.34725
		-0.076	2.36091
		-0.0758	2.37461
		-0.0756	2.38836
		-0.0754	2.40215
		-0.0752	2.41599
		-0.075	2.42986
		-0.0748	2.44379
		-0.0746	2.45775
		-0.0744	2.47176
		-0.0742	2.48581
		-0.074	2.49991
		-0.0738	2.51405
		-0.0736	2.52823
		-0.0734	2.54245
		-0.0732	2.55672
		-0.073	2.57103
		-0.0728	2.58537
		-0.0726	2.59977
		-0.0724	2.6142
		-0.0722	2.62867
		-0.072	2.64319
		-0.0718	2.65775
		-0.0716	2.67235
		-0.0714	2.68699
		-0.0712	2.70167
		-0.071	2.71639
		-0.0708	2.73115
		-0.0706	2.74596
		-0.0704	2.7608
		-0.0702	2.77569
		-0.07	2.79061
		-0.0698	2.80558
		-0.0696	2.82059
		-0.0694	2.83564
		-0.0692	2.85073
		-0.069	2.86586
		-0.0688	2.88103
		-0.0686	2.89624
		-0.0684	2.91149
		-0.0682	2.92679
		-0.068	2.94212
		-0.0678	2.9575
		-0.0676	2.97292
		-0.0674	2.98838
		-0.0672	3.00388
		-0.067	3.01942
		-0.0668	3.035
		-0.0666	3.05062
		-0.0664	3.06629
		-0.0662	3.08199
		-0.066	3.09774
		-0.0658	3.11353
		-0.0656	3.12937
		-0.0654	3.14524
		-0.0652	3.16116
		-0.065	3.17712
		-0.0648	3.19312
		-0.0646	3.20916
		-0.0644	3.22525
		-0.0642	3.24138
		-0.064	3.25755
		-0.0638	3.27377
		-0.0636	3.29003
		-0.0634	3.30633
		-0.0632	3.32267
		-0.063	3.33906
		-0.0628	3.3555
		-0.0626	3.37197
		-0.0624	3.38849
		-0.0622	3.40506
		-0.062	3.42167
		-0.0618	3.43832
		-0.0616	3.45502
		-0.0614	3.47176
		-0.0612	3.48855
		-0.061	3.50538
		-0.0608	3.52226
		-0.0606	3.53918
		-0.0604	3.55615
		-0.0602	3.57316
		-0.06	3.59022
		-0.0598	3.60732
		-0.0596	3.62447
		-0.0594	3.64167
		-0.0592	3.65891
		-0.059	3.67619
		-0.0588	3.69352
		-0.0586	3.7109
		-0.0584	3.72832
		-0.0582	3.74579
		-0.058	3.7633
		-0.0578	3.78086
		-0.0576	3.79846
		-0.0574	3.81611
		-0.0572	3.8338
		-0.057	3.85155
		-0.0568	3.86933
		-0.0566	3.88716
		-0.0564	3.90504
		-0.0562	3.92296
		-0.056	3.94092
		-0.0558	3.95893
		-0.0556	3.97699
		-0.0554	3.99509
		-0.0552	4.01323
		-0.055	4.03142
		-0.0548	4.04965
		-0.0546	4.06793
		-0.0544	4.08625
		-0.0542	4.10461
		-0.054	4.12301
		-0.0538	4.14146
		-0.0536	4.15995
		-0.0534	4.17848
		-0.0532	4.19705
		-0.053	4.21567
		-0.0528	4.23432
		-0.0526	4.25302
		-0.0524	4.27175
		-0.0522	4.29053
		-0.052	4.30934
		-0.0518	4.3282
		-0.0516	4.34709
		-0.0514	4.36602
		-0.0512	4.38498
		-0.051	4.40399
		-0.0508	4.42303
		-0.0506	4.44211
		-0.0504	4.46122
		-0.0502	4.48036
		-0.05	4.49955
		-0.0498	4.51876
		-0.0496	4.53801
		-0.0494	4.55729
		-0.0492	4.5766
		-0.049	4.59594
		-0.0488	4.61531
		-0.0486	4.63471
		-0.0484	4.65415
		-0.0482	4.6736
		-0.048	4.69309
		-0.0478	4.71261
		-0.0476	4.73214
		-0.0474	4.75171
		-0.0472	4.7713
		-0.047	4.79091
		-0.0468	4.81055
		-0.0466	4.8302
		-0.0464	4.84988
		-0.0462	4.86958
		-0.046	4.8893
		-0.0458	4.90904
		-0.0456	4.92879
		-0.0454	4.94856
		-0.0452	4.96835
		-0.045	4.98815
		-0.0448	5.00797
		-0.0446	5.0278
		-0.0444	5.04764
		-0.0442	5.0675
		-0.044	5.08736
		-0.0438	5.10723
		-0.0436	5.12712
		-0.0434	5.147
		-0.0432	5.1669
		-0.043	5.1868
		-0.0428	5.20671
		-0.0426	5.22662
		-0.0424	5.24653
		-0.0422	5.26644
		-0.042	5.28636
		-0.0418	5.30627
		-0.0416	5.32618
		-0.0414	5.34609
		-0.0412	5.366
		-0.041	5.3859
		-0.0408	5.4058
		-0.0406	5.42569
		-0.0404	5.44558
		-0.0402	5.46545
		-0.04	5.48532
		-0.0398	5.50517
		-0.0396	5.52502
		-0.0394	5.54485
		-0.0392	5.56467
		-0.039	5.58447
		-0.0388	5.60426
		-0.0386	5.62404
		-0.0384	5.64379
		-0.0382	5.66353
		-0.038	5.68325
		-0.0378	5.70295
		-0.0376	5.72263
		-0.0374	5.74228
		-0.0372	5.76192
		-0.037	5.78153
		-0.0368	5.80111
		-0.0366	5.82067
		-0.0364	5.84021
		-0.0362	5.85971
		-0.036	5.87919
		-0.0358	5.89864
		-0.0356	5.91806
		-0.0354	5.93745
		-0.0352	5.95681
		-0.035	5.97613
		-0.0348	5.99543
		-0.0346	6.01468
		-0.0344	6.03391
		-0.0342	6.0531
		-0.034	6.07225
		-0.0338	6.09137
		-0.0336	6.11045
		-0.0334	6.12949
		-0.0332	6.14849
		-0.033	6.16745
		-0.0328	6.18638
		-0.0326	6.20526
		-0.0324	6.2241
		-0.0322	6.2429
		-0.032	6.26165
		-0.0318	6.28037
		-0.0316	6.29903
		-0.0314	6.31766
		-0.0312	6.33624
		-0.031	6.35477
		-0.0308	6.37326
		-0.0306	6.39171
		-0.0304	6.4101
		-0.0302	6.42845
		-0.03	6.44675
		-0.0298	6.46501
		-0.0296	6.48321
		-0.0294	6.50137
		-0.0292	6.51947
		-0.029	6.53753
		-0.0288	6.55554
		-0.0286	6.5735
		-0.0284	6.5914
		-0.0282	6.60926
		-0.028	6.62706
		-0.0278	6.64482
		-0.0276	6.66252
		-0.0274	6.68017
		-0.0272	6.69777
		-0.027	6.71531
		-0.0268	6.73281
		-0.0266	6.75025
		-0.0264	6.76764
		-0.0262	6.78497
		-0.026	6.80225
		-0.0258	6.81948
		-0.0256	6.83665
		-0.0254	6.85377
		-0.0252	6.87084
		-0.025	6.88785
		-0.0248	6.90481
		-0.0246	6.92172
		-0.0244	6.93857
		-0.0242	6.95537
		-0.024	6.97211
		-0.0238	6.9888
		-0.0236	7.00544
		-0.0234	7.02202
		-0.0232	7.03854
		-0.023	7.05501
		-0.0228	7.07143
		-0.0226	7.08779
		-0.0224	7.1041
		-0.0222	7.12035
		-0.022	7.13655
		-0.0218	7.1527
		-0.0216	7.16879
		-0.0214	7.18482
		-0.0212	7.2008
		-0.021	7.21673
		-0.0208	7.2326
		-0.0206	7.24842
		-0.0204	7.26418
		-0.0202	7.27989
		-0.02	7.29554
		-0.0198	7.31114
		-0.0196	7.32669
		-0.0194	7.34218
		-0.0192	7.35761
		-0.019	7.37299
		-0.0188	7.38831
		-0.0186	7.40358
		-0.0184	7.4188
		-0.0182	7.43396
		-0.018	7.44906
		-0.0178	7.46411
		-0.0176	7.4791
		-0.0174	7.49404
		-0.0172	7.50892
		-0.017	7.52375
		-0.0168	7.53852
		-0.0166	7.55323
		-0.0164	7.56789
		-0.0162	7.58249
		-0.016	7.59703
		-0.0158	7.61152
		-0.0156	7.62594
		-0.0154	7.64032
		-0.0152	7.65463
		-0.015	7.66888
		-0.0148	7.68308
		-0.0146	7.69721
		-0.0144	7.71129
		-0.0142	7.72531
		-0.014	7.73926
		-0.0138	7.75316
		-0.0136	7.76699
		-0.0134	7.78077
		-0.0132	7.79448
		-0.013	7.80812
		-0.0128	7.82171
		-0.0126	7.83523
		-0.0124	7.84868
		-0.0122	7.86207
		-0.012	7.8754
		-0.0118	7.88865
		-0.0116	7.90184
		-0.0114	7.91496
		-0.0112	7.92802
		-0.011	7.941
		-0.0108	7.95391
		-0.0106	7.96675
		-0.0104	7.97952
		-0.0102	7.99222
		-0.01	8.00484
		-0.0098	8.01738
		-0.0096	8.02985
		-0.0094	8.04225
		-0.0092	8.05456
		-0.009	8.06679
		-0.0088	8.07895
		-0.0086	8.09102
		-0.0084	8.10301
		-0.0082	8.11492
		-0.008	8.12673
		-0.0078	8.13847
		-0.0076	8.15011
		-0.0074	8.16167
		-0.0072	8.17313
		-0.007	8.18451
		-0.0068	8.19579
		-0.0066	8.20697
		-0.0064	8.21806
		-0.0062	8.22905
		-0.006	8.23994
		-0.0058	8.25073
		-0.0056	8.26142
		-0.0054	8.272
		-0.0052	8.28248
		-0.005	8.29284
		-0.0048	8.3031
		-0.0046	8.31325
		-0.0044	8.32329
		-0.0042	8.33321
		-0.004	8.34301
		-0.0038	8.3527
		-0.0036	8.36226
		-0.0034	8.37171
		-0.0032	8.38103
		-0.003	8.39022
		-0.0028	8.39928
		-0.0026	8.40822
		-0.0024	8.41702
		-0.0022	8.42569
		-0.002	8.43423
		-0.0018	8.44262
		-0.0016	8.45088
		-0.0014	8.45899
		-0.0012	8.46696
		-0.001	8.47478
		-0.0008	8.48246
		-0.0006	8.48998
		-0.0004	8.49735
		-0.0002	8.50456
		-1.51788e-18	8.51162
		0.0002	8.51852
		0.0004	8.52525
		0.0006	8.53182
		0.0008	8.53823
		0.001	8.54447
		0.0012	8.55053
		0.0014	8.55642
		0.0016	8.56214
		0.0018	8.56768
		0.002	8.57304
		0.0022	8.57822
		0.0024	8.58321
		0.0026	8.58801
		0.0028	8.59263
		0.003	8.59706
		0.0032	8.60129
		0.0034	8.60532
		0.0036	8.60916
		0.0038	8.6128
		0.004	8.61623
		0.0042	8.61946
		0.0044	8.62248
		0.0046	8.62529
		0.0048	8.62789
		0.005	8.63027
		0.0052	8.63244
		0.0054	8.6344
		0.0056	8.63613
		0.0058	8.63763
		0.006	8.63892
		0.0062	8.63997
		0.0064	8.6408
		0.0066	8.6414
		0.0068	8.64176
		0.007	8.64189
		0.0072	8.64178
		0.0074	8.64143
		0.0076	8.64084
		0.0078	8.64001
		0.008	8.63893
		0.0082	8.63761
		0.0084	8.63604
		0.0086	8.63421
		0.0088	8.63214
		0.009	8.62981
		0.0092	8.62723
		0.0094	8.62439
		0.0096	8.62129
		0.0098	8.61793
		0.01	8.61431
		0.0102	8.61043
		0.0104	8.60628
		0.0106	8.60187
		0.0108	8.59718
		0.011	8.59223
		0.0112	8.58702
		0.0114	8.58153
		0.0116	8.57576
		0.0118	8.56973
		0.012	8.56342
		0.0122	8.55683
		0.0124	8.54997
		0.0126	8.54284
		0.0128	8.53542
		0.013	8.52773
		0.0132	8.51975
		0.0134	8.5115
		0.0136	8.50297
		0.0138	8.49416
		0.014	8.48506
		0.0142	8.47568
		0.0144	8.46602
		0.0146	8.45608
		0.0148	8.44586
		0.015	8.43535
		0.0152	8.42456
		0.0154	8.41349
		0.0156	8.40213
		0.0158	8.39049
		0.016	8.37857
		0.0162	8.36636
		0.0164	8.35388
		0.0166	8.34111
		0.0168	8.32806
		0.017	8.31473
		0.0172	8.30112
		0.0174	8.28723
		0.0176	8.27306
		0.0178	8.25861
		0.018	8.24389
		0.0182	8.22889
		0.0184	8.21361
		0.0186	8.19806
		0.0188	8.18223
		0.019	8.16614
		0.0192	8.14977
		0.0194	8.13313
		0.0196	8.11623
		0.0198	8.09905
		0.02	8.08162
		0.0202	8.06391
		0.0204	8.04595
		0.0206	8.02772
		0.0208	8.00924
		0.021	7.9905
		0.0212	7.97151
		0.0214	7.95226
		0.0216	7.93276
		0.0218	7.91301
		0.022	7.89301
		0.0222	7.87277
		0.0224	7.85229
		0.0226	7.83157
		0.0228	7.81061
		0.023	7.78941
		0.0232	7.76799
		0.0234	7.74633
		0.0236	7.72444
		0.0238	7.70233
		0.024	7.68
		0.0242	7.65744
		0.0244	7.63467
		0.0246	7.61169
		0.0248	7.5885
		0.025	7.56509
		0.0252	7.54149
		0.0254	7.51768
		0.0256	7.49367
		0.0258	7.46946
		0.026	7.44507
		0.0262	7.42048
		0.0264	7.39571
		0.0266	7.37075
		0.0268	7.34562
		0.027	7.32031
		0.0272	7.29482
		0.0274	7.26917
		0.0276	7.24335
		0.0278	7.21737
		0.028	7.19123
		0.0282	7.16493
		0.0284	7.13849
		0.0286	7.11189
		0.0288	7.08515
		0.029	7.05827
		0.0292	7.03125
		0.0294	7.0041
		0.0296	6.97682
		0.0298	6.94941
		0.03	6.92188
		0.0302	6.89423
		0.0304	6.86647
		0.0306	6.8386
		0.0308	6.81061
		0.031	6.78253
		0.0312	6.75434
		0.0314	6.72606
		0.0316	6.69769
		0.0318	6.66923
		0.032	6.64068
		0.0322	6.61206
		0.0324	6.58335
		0.0326	6.55458
		0.0328	6.52573
		0.033	6.49682
		0.0332	6.46785
		0.0334	6.43882
		0.0336	6.40973
		0.0338	6.3806
		0.034	6.35142
		0.0342	6.32219
		0.0344	6.29293
		0.0346	6.26363
		0.0348	6.2343
		0.035	6.20494
		0.0352	6.17555
		0.0354	6.14615
		0.0356	6.11673
		0.0358	6.08729
		0.036	6.05784
		0.0362	6.02839
		0.0364	5.99893
		0.0366	5.96948
		0.0368	5.94003
		0.037	5.91058
		0.0372	5.88115
		0.0374	5.85173
		0.0376	5.82232
		0.0378	5.79294
		0.038	5.76358
		0.0382	5.73425
		0.0384	5.70495
		0.0386	5.67568
		0.0388	5.64645
		0.039	5.61726
		0.0392	5.58811
		0.0394	5.55901
		0.0396	5.52995
		0.0398	5.50095
		0.04	5.472
		0.0402	5.44311
		0.0404	5.41428
		0.0406	5.38551
		0.0408	5.35681
		0.041	5.32817
		0.0412	5.29961
		0.0414	5.27112
		0.0416	5.2427
		0.0418	5.21437
		0.042	5.18612
		0.0422	5.15795
		0.0424	5.12986
		0.0426	5.10187
		0.0428	5.07396
		0.043	5.04615
		0.0432	5.01843
		0.0434	4.99081
		0.0436	4.96329
		0.0438	4.93587
		0.044	4.90856
		0.0442	4.88134
		0.0444	4.85424
		0.0446	4.82725
		0.0448	4.80037
		0.045	4.7736
		0.0452	4.74694
		0.0454	4.7204
		0.0456	4.69398
		0.0458	4.66768
		0.046	4.6415
		0.0462	4.61545
		0.0464	4.58951
		0.0466	4.56371
		0.0468	4.53803
		0.047	4.51248
		0.0472	4.48706
		0.0474	4.46177
		0.0476	4.43661
		0.0478	4.41159
		0.048	4.3867
		0.0482	4.36195
		0.0484	4.33733
		0.0486	4.31285
		0.0488	4.28851
		0.049	4.26431
		0.0492	4.24026
		0.0494	4.21634
		0.0496	4.19257
		0.0498	4.16894
		0.05	4.14545
		0.0502	4.12211
		0.0504	4.09891
		0.0506	4.07586
		0.0508	4.05296
		0.051	4.0302
		0.0512	4.0076
		0.0514	3.98514
		0.0516	3.96283
		0.0518	3.94067
		0.052	3.91866
		0.0522	3.8968
		0.0524	3.87508
		0.0526	3.85353
		0.0528	3.83212
		0.053	3.81086
		0.0532	3.78975
		0.0534	3.7688
		0.0536	3.748
		0.0538	3.72735
		0.054	3.70685
		0.0542	3.6865
		0.0544	3.66631
		0.0546	3.64627
		0.0548	3.62638
		0.055	3.60664
		0.0552	3.58705
		0.0554	3.56762
		0.0556	3.54834
		0.0558	3.52921
		0.056	3.51023
		0.0562	3.4914
		0.0564	3.47273
		0.0566	3.4542
		0.0568	3.43583
		0.057	3.4176
		0.0572	3.39953
		0.0574	3.38161
		0.0576	3.36383
		0.0578	3.3462
		0.058	3.32873
		0.0582	3.3114
		0.0584	3.29421
		0.0586	3.27718
		0.0588	3.26029
		0.059	3.24355
		0.0592	3.22695
		0.0594	3.2105
		0.0596	3.1942
		0.0598	3.17803
		0.06	3.16201
		0.0602	3.14614
		0.0604	3.1304
		0.0606	3.11481
		0.0608	3.09936
		0.061	3.08405
		0.0612	3.06888
		0.0614	3.05385
		0.0616	3.03895
		0.0618	3.02419
		0.062	3.00957
		0.0622	2.99509
		0.0624	2.98074
		0.0626	2.96653
		0.0628	2.95245
		0.063	2.9385
		0.0632	2.92468
		0.0634	2.911
		0.0636	2.89744
		0.0638	2.88401
		0.064	2.87072
		0.0642	2.85755
		0.0644	2.8445
		0.0646	2.83159
		0.0648	2.8188
		0.065	2.80613
		0.0652	2.79358
		0.0654	2.78116
		0.0656	2.76886
		0.0658	2.75667
		0.066	2.74461
		0.0662	2.73266
		0.0664	2.72084
		0.0666	2.70912
		0.0668	2.69753
		0.067	2.68604
		0.0672	2.67467
		0.0674	2.66342
		0.0676	2.65227
		0.0678	2.64123
		0.068	2.6303
		0.0682	2.61948
		0.0684	2.60877
		0.0686	2.59816
		0.0688	2.58765
		0.069	2.57725
		0.0692	2.56695
		0.0694	2.55675
		0.0696	2.54666
		0.0698	2.53666
		0.07	2.52675
		0.0702	2.51695
		0.0704	2.50724
		0.0706	2.49762
		0.0708	2.4881
		0.071	2.47866
		0.0712	2.46932
		0.0714	2.46007
		0.0716	2.45091
		0.0718	2.44183
		0.072	2.43284
		0.0722	2.42393
		0.0724	2.41511
		0.0726	2.40637
		0.0728	2.39771
		0.073	2.38913
		0.0732	2.38062
		0.0734	2.3722
		0.0736	2.36385
		0.0738	2.35558
		0.074	2.34738
		0.0742	2.33925
		0.0744	2.33119
		0.0746	2.32321
		0.0748	2.31529
		0.075	2.30744
		0.0752	2.29966
		0.0754	2.29194
		0.0756	2.28428
		0.0758	2.27669
		0.076	2.26916
		0.0762	2.26169
		0.0764	2.25427
		0.0766	2.24692
		0.0768	2.23962
		0.077	2.23237
		0.0772	2.22518
		0.0774	2.21805
		0.0776	2.21096
		0.0778	2.20392
		0.078	2.19694
		0.0782	2.19
		0.0784	2.1831
		0.0786	2.17625
		0.0788	2.16945
		0.079	2.16269
		0.0792	2.15597
		0.0794	2.14929
		0.0796	2.14264
		0.0798	2.13604
		0.08	2.12947
		0.0802	2.12294
		0.0804	2.11644
		0.0806	2.10998
		0.0808	2.10354
		0.081	2.09714
		0.0812	2.09077
		0.0814	2.08442
		0.0816	2.07811
		0.0818	2.07181
		0.082	2.06555
		0.0822	2.0593
		0.0824	2.05308
		0.0826	2.04688
		0.0828	2.0407
		0.083	2.03454
		0.0832	2.02839
		0.0834	2.02226
		0.0836	2.01615
		0.0838	2.01005
		0.084	2.00397
		0.0842	1.9979
		0.0844	1.99184
		0.0846	1.98578
		0.0848	1.97974
		0.085	1.97371
		0.0852	1.96768
		0.0854	1.96166
		0.0856	1.95564
		0.0858	1.94963
		0.086	1.94362
		0.0862	1.93761
		0.0864	1.9316
		0.0866	1.9256
		0.0868	1.91959
		0.087	1.91358
		0.0872	1.90756
		0.0874	1.90154
		0.0876	1.89552
		0.0878	1.88949
		0.088	1.88345
		0.0882	1.87741
		0.0884	1.87136
		0.0886	1.8653
		0.0888	1.85923
		0.089	1.85314
		0.0892	1.84705
		0.0894	1.84094
		0.0896	1.83482
		0.0898	1.82869
		0.09	1.82254
		0.0902	1.81637
		0.0904	1.81019
		0.0906	1.80399
		0.0908	1.79778
		0.091	1.79154
		0.0912	1.78529
		0.0914	1.77902
		0.0916	1.77272
		0.0918	1.76641
		0.092	1.76007
		0.0922	1.75371
		0.0924	1.74733
		0.0926	1.74093
		0.0928	1.7345
		0.093	1.72805
		0.0932	1.72157
		0.0934	1.71507
		0.0936	1.70854
		0.0938	1.70198
		0.094	1.6954
		0.0942	1.6888
		0.0944	1.68216
		0.0946	1.6755
		0.0948	1.66881
		0.095	1.66209
		0.0952	1.65534
		0.0954	1.64857
		0.0956	1.64176
		0.0958	1.63493
		0.096	1.62807
		0.0962	1.62117
		0.0964	1.61425
		0.0966	1.6073
		0.0968	1.60032
		0.097	1.59331
		0.0972	1.58626
		0.0974	1.57919
		0.0976	1.57209
		0.0978	1.56496
		0.098	1.55779
		0.0982	1.5506
		0.0984	1.54337
		0.0986	1.53612
		0.0988	1.52884
		0.099	1.52152
		0.0992	1.51418
		0.0994	1.50681
		0.0996	1.4994
		0.0998	1.49197
		0.1	1.48451
		0.1002	1.47702
		0.1004	1.46951
		0.1006	1.46196
		0.1008	1.45438
		0.101	1.44678
		0.1012	1.43915
		0.1014	1.4315
		0.1016	1.42382
		0.1018	1.41611
		0.102	1.40837
		0.1022	1.40061
		0.1024	1.39283
		0.1026	1.38502
		0.1028	1.37719
		0.103	1.36933
		0.1032	1.36145
		0.1034	1.35355
		0.1036	1.34563
		0.1038	1.33768
		0.104	1.32972
		0.1042	1.32173
		0.1044	1.31372
		0.1046	1.3057
		0.1048	1.29766
		0.105	1.2896
		0.1052	1.28152
		0.1054	1.27343
		0.1056	1.26532
		0.1058	1.2572
		0.106	1.24906
		0.1062	1.24091
		0.1064	1.23275
		0.1066	1.22457
		0.1068	1.21639
		0.107	1.20819
		0.1072	1.19998
		0.1074	1.19177
		0.1076	1.18355
		0.1078	1.17532
		0.108	1.16708
		0.1082	1.15884
		0.1084	1.15059
		0.1086	1.14234
		0.1088	1.13409
		0.109	1.12583
		0.1092	1.11757
		0.1094	1.10931
		0.1096	1.10106
		0.1098	1.0928
		0.11	1.08454
		0.1102	1.07629
		0.1104	1.06804
		0.1106	1.0598
		0.1108	1.05156
		0.111	1.04333
		0.1112	1.0351
		0.1114	1.02689
		0.1116	1.01868
		0.1118	1.01048
		0.112	1.00229
		0.1122	0.994115
		0.1124	0.985951
		0.1126	0.977799
		0.1128	0.969661
		0.113	0.961538
		0.1132	0.95343
		0.1134	0.945339
		0.1136	0.937264
		0.1138	0.929208
		0.114	0.92117
		0.1142	0.913152
		0.1144	0.905154
		0.1146	0.897177
		0.1148	0.889222
		0.115	0.88129
		0.1152	0.873381
		0.1154	0.865496
		0.1156	0.857635
		0.1158	0.849801
		0.116	0.841992
		0.1162	0.834211
		0.1164	0.826457
		0.1166	0.818731
		0.1168	0.811035
		0.117	0.803368
		0.1172	0.795731
		0.1174	0.788125
		0.1176	0.78055
		0.1178	0.773008
		0.118	0.765499
		0.1182	0.758023
		0.1184	0.75058
		0.1186	0.743172
		0.1188	0.735799
		0.119	0.728462
		0.1192	0.721161
		0.1194	0.713896
		0.1196	0.706668
		0.1198	0.699478
		0.12	0.692325
		0.1202	0.685211
		0.1204	0.678136
		0.1206	0.6711
		0.1208	0.664104
		0.121	0.657148
		0.1212	0.650232
		0.1214	0.643358
		0.1216	0.636524
		0.1218	0.629732
		0.122	0.622982
		0.1222	0.616274
		0.1224	0.609608
		0.1226	0.602985
		0.1228	0.596405
		0.123	0.589869
		0.1232	0.583376
		0.1234	0.576927
		0.1236	0.570521
		0.1238	0.56416
		0.124	0.557844
		0.1242	0.551572
		0.1244	0.545344
		0.1246	0.539162
		0.1248	0.533025
		0.125	0.526932
		0.1252	0.520886
		0.1254	0.514884
		0.1256	0.508928
		0.1258	0.503018
		0.126	0.497153
		0.1262	0.491334
		0.1264	0.485561
		0.1266	0.479834
		0.1268	0.474152
		0.127	0.468517
		0.1272	0.462927
		0.1274	0.457384
		0.1276	0.451886
		0.1278	0.446434
		0.128	0.441028
		0.1282	0.435667
		0.1284	0.430353
		0.1286	0.425084
		0.1288	0.419861
		0.129	0.414683
		0.1292	0.409551
		0.1294	0.404465
		0.1296	0.399423
		0.1298	0.394427
		0.13	0.389476
		0.1302	0.38457
		0.1304	0.379709
		0.1306	0.374893
		0.1308	0.370121
		0.131	0.365394
		0.1312	0.360711
		0.1314	0.356072
		0.1316	0.351477
		0.1318	0.346926
		0.132	0.342419
		0.1322	0.337955
		0.1324	0.333535
		0.1326	0.329157
		0.1328	0.324823
		0.133	0.320531
		0.1332	0.316282
		0.1334	0.312075
		0.1336	0.30791
		0.1338	0.303788
		0.134	0.299707
		0.1342	0.295667
		0.1344	0.291669
		0.1346	0.287712
		0.1348	0.283795
		0.135	0.279919
		0.1352	0.276084
		0.1354	0.272289
		0.1356	0.268533
		0.1358	0.264818
		0.136	0.261141
		0.1362	0.257504
		0.1364	0.253906
		0.1366	0.250347
		0.1368	0.246825
		0.137	0.243343
		0.1372	0.239898
		0.1374	0.236491
		0.1376	0.233121
		0.1378	0.229788
		0.138	0.226493
		0.1382	0.223234
		0.1384	0.220011
		0.1386	0.216825
		0.1388	0.213674
		0.139	0.210559
		0.1392	0.20748
		0.1394	0.204436
		0.1396	0.201427
		0.1398	0.198452
		0.14	0.195511
		0.1402	0.192605
		0.1404	0.189733
		0.1406	0.186894
		0.1408	0.184089
		0.141	0.181316
		0.1412	0.178577
		0.1414	0.17587
		0.1416	0.173195
		0.1418	0.170553
		0.142	0.167942
		0.1422	0.165362
		0.1424	0.162814
		0.1426	0.160298
		0.1428	0.157811
		0.143	0.155356
		0.1432	0.15293
		0.1434	0.150535
		0.1436	0.148169
		0.1438	0.145833
		0.144	0.143526
		0.1442	0.141249
		0.1444	0.139
		0.1446	0.136779
		0.1448	0.134587
		0.145	0.132423
		0.1452	0.130286
		0.1454	0.128177
		0.1456	0.126096
		0.1458	0.124041
		0.146	0.122013
		0.1462	0.120012
		0.1464	0.118037
		0.1466	0.116088
		0.1468	0.114166
		0.147	0.112268
		0.1472	0.110396
		0.1474	0.108549
		0.1476	0.106727
		0.1478	0.10493
		0.148	0.103157
		0.1482	0.101409
		0.1484	0.0996838
		0.1486	0.0979829
		0.1488	0.0963054
		0.149	0.0946512
		0.1492	0.0930201
		0.1494	0.0914118
		0.1496	0.0898261
		0.1498	0.0882628
		0.15	0.0867216
		0.1502	0.0852023
		0.1504	0.0837048
		0.1506	0.0822288
		0.1508	0.080774
		0.151	0.0793402
		0.1512	0.0779273
		0.1514	0.076535
		0.1516	0.0751631
		0.1518	0.0738114
		0.152	0.0724797
		0.1522	0.0711677
		0.1524	0.0698753
		0.1526	0.0686022
		0.1528	0.0673482
		0.153	0.0661131
		0.1532	0.0648968
		0.1534	0.063699
		0.1536	0.0625194
		0.1538	0.061358
		0.154	0.0602145
		0.1542	0.0590886
		0.1544	0.0579802
		0.1546	0.0568892
		0.1548	0.0558152
		0.155	0.0547581
		0.1552	0.0537178
		0.1554	0.0526939
		0.1556	0.0516863
		0.1558	0.0506949
		0.156	0.0497193
		0.1562	0.0487596
		0.1564	0.0478153
		0.1566	0.0468864
		0.1568	0.0459727
		0.157	0.045074
		0.1572	0.0441901
		0.1574	0.0433207
		0.1576	0.0424659
		0.1578	0.0416252
		0.158	0.0407987
		0.1582	0.039986
		0.1584	0.039187
		0.1586	0.0384016
		0.1588	0.0376296
		0.159	0.0368707
		0.1592	0.0361249
		0.1594	0.0353919
		0.1596	0.0346715
		0.1598	0.0339637
		0.16	0.0332682
		0.1602	0.0325849
		0.1604	0.0319136
		0.1606	0.0312541
		0.1608	0.0306063
		0.161	0.02997
		0.1612	0.0293451
		0.1614	0.0287314
		0.1616	0.0281287
		0.1618	0.0275369
		0.162	0.0269558
		0.1622	0.0263853
		0.1624	0.0258253
		0.1626	0.0252755
		0.1628	0.0247358
		0.163	0.0242061
		0.1632	0.0236862
		0.1634	0.023176
		0.1636	0.0226754
		0.1638	0.0221841
		0.164	0.0217021
		0.1642	0.0212293
		0.1644	0.0207653
		0.1646	0.0203103
		0.1648	0.0198639
		0.165	0.0194261
		0.1652	0.0189967
		0.1654	0.0185757
		0.1656	0.0181628
		0.1658	0.0177579
		0.166	0.017361
		0.1662	0.0169719
		0.1664	0.0165904
		0.1666	0.0162165
		0.1668	0.0158499
		0.167	0.0154907
		0.1672	0.0151386
		0.1674	0.0147937
		0.1676	0.0144556
		0.1678	0.0141244
		0.168	0.0137999
		0.1682	0.0134819
		0.1684	0.0131705
		0.1686	0.0128654
		0.1688	0.0125667
		0.169	0.012274
		0.1692	0.0119874
		0.1694	0.0117068
		0.1696	0.011432
		0.1698	0.011163
		0.17	0.0108996
		0.1702	0.0106417
		0.1704	0.0103893
		0.1706	0.0101423
		0.1708	0.00990043
		0.171	0.00966377
		0.1712	0.00943217
		0.1714	0.00920554
		0.1716	0.00898379
		0.1718	0.00876683
		0.172	0.00855457
		0.1722	0.00834693
		0.1724	0.00814381
		0.1726	0.00794514
		0.1728	0.00775083
		0.173	0.0075608
		0.1732	0.00737496
		0.1734	0.00719324
		0.1736	0.00701557
		0.1738	0.00684185
		0.174	0.00667202
		0.1742	0.006506
		0.1744	0.00634372
		0.1746	0.00618509
		0.1748	0.00603006
		0.175	0.00587854
		0.1752	0.00573048
		0.1754	0.00558581
		0.1756	0.00544445
		0.1758	0.00530634
		0.176	0.00517141
		0.1762	0.00503961
		0.1764	0.00491086
		0.1766	0.0047851
		0.1768	0.00466227
		0.177	0.00454232
		0.1772	0.00442519
		0.1774	0.00431081
		0.1776	0.00419913
		0.1778	0.0040901
		0.178	0.00398365
		0.1782	0.00387973
		0.1784	0.00377829
		0.1786	0.00367929
		0.1788	0.00358265
		0.179	0.00348835
		0.1792	0.00339631
		0.1794	0.0033065
		0.1796	0.00321888
		0.1798	0.00313339
		0.18	0.00304998
		0.1802	0.00296861
		0.1804	0.00288924
		0.1806	0.00281183
		0.1808	0.00273632
		0.181	0.00266268
		0.1812	0.00259086
		0.1814	0.00252083
		0.1816	0.00245255
		0.1818	0.00238597
		0.182	0.00232106
		0.1822	0.00225778
		0.1824	0.00219609
		0.1826	0.00213596
		0.1828	0.00207736
		0.183	0.00202024
		0.1832	0.00196457
		0.1834	0.00191032
		0.1836	0.00185746
		0.1838	0.00180596
		0.184	0.00175578
		0.1842	0.0017069
		0.1844	0.00165928
		0.1846	0.00161288
		0.1848	0.00156769
		0.185	0.00152368
		0.1852	0.00148082
		0.1854	0.00143908
		0.1856	0.00139844
		0.1858	0.00135886
		0.186	0.00132032
		0.1862	0.0012828
		0.1864	0.00124628
		0.1866	0.00121072
		0.1868	0.00117611
		0.187	0.00114242
		0.1872	0.00110964
		0.1874	0.00107773
		0.1876	0.00104667
		0.1878	0.00101645
		0.188	0.000987052
		0.1882	0.000958443
		0.1884	0.000930603
		0.1886	0.000903519
		0.1888	0.000877179
		0.189	0.000851544
		0.1892	0.000826624
		0.1894	0.000802379
		0.1896	0.000778808
		0.1898	0.000755886
		0.19	0.000733595
		0.1902	0.000711921
		0.1904	0.000690848
		0.1906	0.000670359
		0.1908	0.000650441
		0.191	0.000631078
		0.1912	0.000612257
		0.1914	0.000593956
		0.1916	0.000576176
		0.1918	0.000558896
		0.192	0.000542103
		0.1922	0.000525784
		0.1924	0.000509921
		0.1926	0.000494515
		0.1928	0.000479547
		0.193	0.000465006
		0.1932	0.000450879
		0.1934	0.000437157
		0.1936	0.000423829
		0.1938	0.000410883
		0.194	0.000398311
		0.1942	0.000386101
		0.1944	0.000374244
		0.1946	0.00036273
		0.1948	0.000351551
		0.195	0.000340697
		0.1952	0.00033016
		0.1954	0.00031993
		0.1956	0.00031
		0.1958	0.000300361
		0.196	0.000291006
		0.1962	0.000281925
		0.1964	0.000273113
		0.1966	0.000264561
		0.1968	0.000256263
		0.197	0.000248211
		0.1972	0.000240399
		0.1974	0.000232819
		0.1976	0.000225466
		0.1978	0.000218332
		0.198	0.000211413
		0.1982	0.000204701
		0.1984	0.000198191
		0.1986	0.000191878
		0.1988	0.000185755
		0.199	0.000179818
		0.1992	0.000174061
		0.1994	0.000168478
		0.1996	0.000163066
		0.1998	0.000157818
[truncated: 1 more rows]

## Sheet: PZH12-15
Time	Grain	Sample	44Ca	46Ti	47Ti	48Ti	49Ti	50Ti	49Ti/47Ti	se	46Ti/47Ti	se	48Ti/47Ti	se	δ49/47Ti	2se	δ46/47Ti	δ48/47Ti
2021-09-02	Grain 1	PZH12-15 01	0.000376076	3.11699	2.92412	30.1753	2.30144	2.29424	0.787054	1.81427e-05	1.06596	2.00878e-05	10.3194	0.000145965
		PZH12-15 02	0.00038605	3.06131	2.87189	29.6355	2.26018	2.25297	0.787005	2.12159e-05	1.06596	2.14528e-05	10.3192	0.000172473	-0.0418783	0.0539132	0.0122185	-0.0133492
		PZH12-15 03	0.000374376	3.10277	2.91086	30.0377	2.2909	2.28373	0.787022	1.73948e-05	1.06593	2.26057e-05	10.3192	0.000140908	-0.0185463	0.0442032	-0.0179806	-0.0222727
		PZH12-15 04	0.000336648	3.08193	2.89129	29.8371	2.27564	2.26845	0.787068	1.74943e-05	1.06594	2.3447e-05	10.3196	0.00015267	-0.0223222	0.0444533	0.0429724	0.00744709
		PZH12-15 05	0.000364903	3.10423	2.91243	30.0561	2.29251	2.28532	0.78715	1.84418e-05	1.06585	2.00219e-05	10.32	0.000149424	0.111867	0.0468624	-0.0434331	0.0401434
		PZH12-15 06	0.000347826	3.14319	2.94895	30.4316	2.32099	2.3137	0.787055	1.5958e-05	1.06586	2.33978e-05	10.3194	0.000156234	-0.0510314	0.0405491	-0.0323752	-0.0222619
		PZH12-15 07	0.000367114	3.0944	2.90296	29.9568	2.28475	2.27748	0.787041	1.79826e-05	1.06594	2.17438e-05	10.3194	0.000144518	0.0372403	0.0456984	0.0427208	0.00737787
		PZH12-15 08	0.000624817	3.15362	2.95856	30.5298	2.32829	2.32096	0.786968	1.48341e-05	1.06593	1.88786e-05	10.3192	0.000134575	-0.11352	0.0376952	-0.0310171	-0.0258905
	Grain 2	PZH12-15 09	0.000336698	3.17118	2.97488	30.6992	2.34144	2.33404	0.787074	1.66426e-05	1.06599	2.29548e-05	10.3195	0.000148968	0.108556	0.0422944	0.0667482	0.0402965
		PZH12-15 10	0.000331055	3.15689	2.96172	30.562	2.3309	2.32347	0.787009	1.55689e-05	1.0659	2.1343e-05	10.319	0.000176491	-0.0400948	0.0395632	-0.0688341	-0.0344379
		PZH12-15 11	0.000355453	3.21124	3.01254	31.0869	2.37088	2.36339	0.787007	1.83955e-05	1.06596	2.15606e-05	10.3192	0.000152043	-0.00805303	0.0467475	0.0387112	0.00520072
		PZH12-15 12	0.000409018	3.29279	3.08911	31.8774	2.43118	2.42341	0.787017	1.89055e-05	1.06593	2.24745e-05	10.3193	0.000154075	0.0214169	0.0480444	-0.0155069	0.0295772
		PZH12-15 13	0.000348487	3.17308	2.97678	30.7167	2.34271	2.33513	0.786994	1.83524e-05	1.06594	2.23238e-05	10.3188	0.000165888	-0.0277384	0.0466379	-0.0106731	-0.0479604
		PZH12-15 14	0.000374533	3.18839	2.99106	30.8655	2.35401	2.34651	0.787015	1.75788e-05	1.06598	1.89658e-05	10.3192	0.000150663	0.0205667	0.0446731	0.00865241	0.0303808
		PZH12-15 15	0.000377348	3.14476	2.95008	30.4422	2.32172	2.31431	0.787003	1.83127e-05	1.06599	2.25852e-05	10.3191	0.00015869	-0.0167477	0.0465369	0.00564605	-0.0184523
		PZH12-15 16	0.000332994	3.16844	2.9723	30.6721	2.33925	2.33175	0.787018	1.66576e-05	1.06599	2.19333e-05	10.3193	0.00014839	0.0247185	0.0423321	0.0172671	0.0262555
	Grain 3	PZH12-15 17	0.000344811	3.0334	2.8457	29.3648	2.23954	2.23252	0.786994	1.93111e-05	1.06596	2.04459e-05	10.319	0.000144488	0.00468085	0.0490759	-0.0327914	-0.0088949
		PZH12-15 18	0.000415274	3.17238	2.97599	30.7089	2.34199	2.33451	0.786962	1.8759e-05	1.06599	2.27413e-05	10.3189	0.000168603	-0.0318887	0.0476731	0.0293773	-0.00454904
		PZH12-15 19	0.0003372	3.18237	2.98544	30.8063	2.34948	2.34196	0.78698	1.81673e-05	1.06596	2.04098e-05	10.3188	0.000147183	0.00269781	0.0461698	-0.0256047	-0.0196728
		PZH12-15 20	0.000359676	3.1231	2.92977	30.2329	2.30572	2.29841	0.786995	1.75696e-05	1.06599	1.99361e-05	10.3192	0.000187723	-0.00763828	0.0446496	0.0410006	0.0179807
	Grain 4	PZH12-15 21	0.000327132	3.06831	2.87853	29.7041	2.26546	2.25841	0.787021	1.46333e-05	1.06593	2.03033e-05	10.3192	0.000139685	0.0159365	0.037187	-0.044655	0.0128212
		PZH12-15 22	0.000308584	3.07414	2.88391	29.7589	2.2697	2.26245	0.787022	2.02043e-05	1.06596	2.28643e-05	10.3189	0.000159365	0.0289455	0.051345	0.0247276	-0.00741706
		PZH12-15 23	0.000334728	3.1303	2.93664	30.3027	2.31107	2.30378	0.786978	1.87081e-05	1.06595	2.53436e-05	10.3188	0.000161465	-0.0349593	0.0475424	0.0131025	-0.0170508
		PZH12-15 24	0.000317749	3.03734	2.84956	29.4049	2.24258	2.23549	0.786989	1.65801e-05	1.0659	2.1363e-05	10.3191	0.00017822	-0.00726583	0.0421351	-0.0654651	-0.00470162
	Grain 5	PZH12-15 25	0.000460388	3.08914	2.8979	29.9046	2.28067	2.27352	0.787011	1.91592e-05	1.06599	2.22178e-05	10.3194	0.000182514	-0.00224472	0.0486885	0.11441	0.0193163
		PZH12-15 26	0.000281003	3.1111	2.91891	30.1213	2.29729	2.29023	0.787037	1.31698e-05	1.06584	1.75512e-05	10.3193	0.00012812	0.00158792	0.0334668	-0.10005	-0.00228327
	Grain 6	PZH12-15 27	0.000302415	3.05172	2.86303	29.5445	2.25337	2.24627	0.78706	2.14025e-05	1.06591	2.37021e-05	10.3193	0.000158104
2021-09-02	Grain 1	PZH12-15 01	0.000344436	3.05625	2.86759	29.5959	2.25754	2.25076	0.787262	1.60975e-05	1.06579	1.97888e-05	10.3208	0.000153687
		PZH12-15 02	0.000352334	2.9825	2.79844	28.884	2.20338	2.19686	0.787363	1.687e-05	1.06577	2.70307e-05	10.3215	0.000182752	0.0507285	0.0428541	0.035307	0.0327398
		PZH12-15 03	0.000336504	3.00898	2.82352	29.1427	2.22319	2.2166	0.787385	1.89576e-05	1.06568	2.4974e-05	10.3214	0.000160193	0.023779	0.0481546	-0.0705538	-0.00956608
		PZH12-15 04	0.000422682	3.04365	2.85589	29.4772	2.24863	2.24205	0.787368	1.87393e-05	1.06574	2.1132e-05	10.3216	0.000181072	0.0123979	0.0476005	0.0342166	0.0137454
		PZH12-15 05	0.000436	3.0175	2.83139	29.224	2.22924	2.22279	0.787333	1.71992e-05	1.06573	2.28669e-05	10.3214	0.000167887	-0.022238	0.0436888	0.0220761	0.00520129
		PZH12-15 06	0.000349752	3.01905	2.833	29.2398	2.2305	2.22396	0.787332	1.92335e-05	1.06567	2.58291e-05	10.3212	0.000171572	-0.00828056	0.0488571	-0.0682641	-0.0145286
		PZH12-15 07	0.000377499	2.99621	2.81136	29.0166	2.2135	2.20691	0.787344	2.0451e-05	1.06575	2.3614e-05	10.3212	0.000148899	0.00358282	0.0519494	0.0652458	-0.00846709
		PZH12-15 08	0.000446465	2.99193	2.80748	28.9773	2.21047	2.20394	0.787351	2.06044e-05	1.0657	2.47893e-05	10.3215	0.000154363	0.0170314	0.0523393	-0.052119	0.0198222
	Grain 2	PZH12-15 09	0.000329555	3.06122	2.87234	29.6462	2.26148	2.25487	0.787331	2.01274e-05	1.06576	2.43854e-05	10.3213	0.000180289	-0.0316816	0.0511266	0.0587015	-0.012574
		PZH12-15 10	0.000585772	3.03844	2.85115	29.4278	2.24488	2.23836	0.787361	1.8368e-05	1.06569	2.39946e-05	10.3214	0.000175023	0.0290162	0.0466585	-0.042342	0.00399627
		PZH12-15 11	0.000324786	3.04163	2.85408	29.458	2.24714	2.24049	0.787345	1.72066e-05	1.06571	2.25654e-05	10.3214	0.000174207	-0.0292575	0.0437066	-0.00261719	-0.0227974
		PZH12-15 12	0.000574888	3.01306	2.82721	29.182	2.22607	2.21961	0.787375	1.81899e-05	1.06574	2.33967e-05	10.3218	0.000141931	0.0416203	0.0462059	0.0111868	0.0381757
		PZH12-15 13	0.00237627	3.07548	2.88576	29.7854	2.27207	2.26547	0.78734	2.10101e-05	1.06574	2.73292e-05	10.3215	0.000178368	0.0355966	0.0533718	-0.00884053	0.024579
	Grain 3	PZH12-15 14	0.000347699	3.07702	2.88715	29.7974	2.2729	2.26605	0.787248	1.6669e-05	1.06576	2.55699e-05	10.3207	0.000140178	-0.0658499	0.0423448	-0.0177923	-0.0544691
		PZH12-15 15	0.00066615	3.03191	2.84467	29.3599	2.2395	2.23286	0.787261	2.12371e-05	1.06583	2.42931e-05	10.321	0.000165602	-0.00994896	0.0539513	0.059922	0.01811
		PZH12-15 16	0.000322174	2.99224	2.80763	28.9773	2.21041	2.20378	0.787289	1.81336e-05	1.06576	2.47245e-05	10.3209	0.000180188	0.0240051	0.0460671	-0.0454106	0.00213731
		PZH12-15 17	0.00033209	3.0053	2.8198	29.1026	2.21997	2.21333	0.787279	2.15567e-05	1.06579	2.53841e-05	10.3208	0.000176948	-0.00273956	0.0547625	0.000998163	-0.0046884
		PZH12-15 18	0.000337121	2.97904	2.79508	28.8475	2.2005	2.19388	0.787273	1.87853e-05	1.06582	2.31582e-05	10.3208	0.00016754	-0.0181412	0.0477217	0.0211769	-0.0119153
	Grain 4	PZH12-15 19	0.000298232	3.05164	2.86324	29.5515	2.25421	2.24739	0.787296	2.05137e-05	1.0658	2.27337e-05	10.321	0.000171643	0.039471	0.0521137	0.0199364	0.0247126
		PZH12-15 20	0.000517165	3.05871	2.87004	29.6209	2.25946	2.25277	0.787257	1.91755e-05	1.06574	2.58717e-05	10.3207	0.000163295	0.00867115	0.0487151	-0.0723864	0.00348467
		PZH12-15 21	0.000295953	3.05325	2.86466	29.5643	2.25507	2.24819	0.787204	1.95673e-05	1.06583	2.3847e-05	10.3204	0.000158568	-0.0786975	0.0497095	0.0828193	-0.0398691
		PZH12-15 22	0.000387124	3.03663	2.84929	29.407	2.24317	2.2365	0.787276	1.87305e-05	1.06575	2.24125e-05	10.3208	0.00016727	0.0472543	0.0475853	-0.0571883	0.0143862
		PZH12-15 23	0.000275951	3.01951	2.83312	29.2406	2.23044	2.22379	0.787272	1.6657e-05	1.06579	2.49846e-05	10.321	0.000174565	2.76188e-05	0.0423158	0.0235789	0.0146212
	Grain 5	PZH12-15 24	0.000353057	2.96822	2.78503	28.7439	2.19256	2.18601	0.787269	1.65899e-05	1.06578	2.36335e-05	10.3209	0.000163962	-0.000101491	0.0421454	-0.0106177	0.000209971
		PZH12-15 25	0.00033648	3.01478	2.82869	29.1941	2.22692	2.2202	0.787266	1.91816e-05	1.06579	2.13692e-05	10.3207	0.00015926	-0.0474972	0.0487273	0.0204815	-0.0394911
		PZH12-15 26	0.000350674	3.01188	2.82604	29.1688	2.22505	2.21849	0.787338	1.78694e-05	1.06576	2.18543e-05	10.3214	0.000168116	0.0746167	0.0453954	-0.033185	0.0457289
		PZH12-15 27	0.00035746	2.98348	2.7993	28.892	2.20387	2.19729	0.787292	1.66789e-05	1.0658	2.20293e-05	10.3211	0.000141842
2021-09-02	Grain 1	PZH12-15 01	0.000404454	3.07827	2.88782	29.7997	2.27276	2.26562	0.787015	1.86127e-05	1.06595	2.40714e-05	10.3191	0.000144977
		PZH12-15 02	0.000324467	3.17384	2.97746	30.7266	2.34344	2.33617	0.787063	1.78113e-05	1.06596	2.23497e-05	10.3197	0.000170417	0.0343817	0.0452618	0.0153116	0.0470427
		PZH12-15 03	0.000690483	3.10124	2.90944	30.0237	2.28989	2.28274	0.787057	1.97339e-05	1.06593	2.34804e-05	10.3194	0.00018046	0.00408811	0.0501464	-0.0227529	-0.0167194
		PZH12-15 04	0.000580881	3.09058	2.89938	29.9199	2.28194	2.27478	0.787044	2.07844e-05	1.06595	2.255e-05	10.3194	0.000173936	-0.0581132	0.0528133	0.0265582	-0.0272254
		PZH12-15 05	0.000459861	3.11224	2.91981	30.1323	2.29825	2.2912	0.787123	2.25098e-05	1.06591	2.16406e-05	10.32	0.000189395	0.08404	0.0571999	-0.0246951	0.0543448
		PZH12-15 06	0.000344057	3.08435	2.89359	29.8602	2.27746	2.27032	0.78707	2.10829e-05	1.06592	2.40756e-05	10.3194	0.000190267	-0.0418409	0.0535709	0.0138709	-0.0257258
		PZH12-15 07	0.000334253	3.07959	2.88918	29.8146	2.27403	2.26699	0.787083	1.72345e-05	1.06591	2.47884e-05	10.3194	0.000145901	-0.0299417	0.0437921	0.00273986	-0.0328515
		PZH12-15 08	0.000608614	3.17	2.97405	30.6923	2.341	2.33369	0.787142	1.82716e-05	1.06589	2.21241e-05	10.3201	0.000159061	0.0267771	0.0464263	-0.00668311	0.0341475
		PZH12-15 09	0.000297103	3.12015	2.92729	30.2097	2.30424	2.29714	0.78716	2.00365e-05	1.06588	2.5559e-05	10.32	0.000167783	0.0285529	0.0509098	0.0063745	-0.00294828
		PZH12-15 10	0.000284216	3.07339	2.88347	29.7574	2.26967	2.26271	0.787132	1.84439e-05	1.06586	2.66564e-05	10.32	0.000162219	-0.0302338	0.046862	-0.00299628	-0.0067779
		PZH12-15 11	0.00030532	3.07822	2.88804	29.8051	2.27333	2.26631	0.787153	1.90691e-05	1.06585	2.19246e-05	10.3202	0.00015084	0.0181638	0.0484518	-0.0289499	0.0122344
		PZH12-15 12	0.00030314	3.14683	2.95228	30.4677	2.32386	2.31669	0.787144	1.8116e-05	1.0659	2.55761e-05	10.3201	0.000174767	0.0116454	0.0460303	0.0748548	0.0113584
		PZH12-15 13	0.000305631	3.07252	2.88286	29.7504	2.26915	2.26228	0.787118	2.00247e-05	1.06579	2.66559e-05	10.3197	0.000173724	-0.0651623	0.0508778	-0.0733029	-0.0443998
	Grain 2	PZH12-15 14	0.000329097	3.05056	2.86213	29.538	2.25304	2.24603	0.787193	2.22152e-05	1.06584	2.21461e-05	10.3203	0.000185192	0.0440427	0.056444	0.0405214	0.00968693
		PZH12-15 15	0.000380405	3.08578	2.8953	29.8814	2.27917	2.27224	0.7872	1.63978e-05	1.06579	2.55172e-05	10.3207	0.000138448	-0.0274275	0.0416599	-0.0161825	0.0130957
		PZH12-15 16	0.000333218	3.07979	2.88969	29.8239	2.2749	2.26798	0.78725	1.87609e-05	1.06579	2.14243e-05	10.3208	0.000167626	0.0719048	0.0476652	-0.00859746	0.0273014
		PZH12-15 17	0.000610527	3.09415	2.90312	29.9612	2.28529	2.27829	0.787186	2.04683e-05	1.0658	2.19931e-05	10.3203	0.000151074	-0.0104412	0.0520031	-0.031574	-0.0130219
	Grain 3	PZH12-15 18	0.000339402	3.09915	2.90759	30.0069	2.28868	2.28165	0.787139	1.76943e-05	1.06588	2.4692e-05	10.3202	0.000141991	-0.0432024	0.0449564	0.0587699	-0.00752367
		PZH12-15 19	0.000398867	3.1053	2.9135	30.0677	2.29339	2.28637	0.78716	1.55538e-05	1.06583	2.18306e-05	10.3201	0.000143846	0.0319436	0.03952	-0.0262109	0.0108216
		PZH12-15 20	0.000310235	3.13144	2.938	30.3198	2.31259	2.30544	0.787131	1.75521e-05	1.06584	2.45581e-05	10.3199	0.000158072	-0.0231914	0.0445967	-0.00432359	-0.0176664
	Grain 4	PZH12-15 21	0.000359831	3.10892	2.91682	30.1016	2.29594	2.28897	0.787138	1.73602e-05	1.06586	2.11585e-05	10.32	0.00014878	0.0281825	0.044111	0.0165209	0.0216593
		PZH12-15 22	0.000337149	3.07823	2.88807	29.804	2.2732	2.26633	0.787101	1.83103e-05	1.06585	2.30648e-05	10.3197	0.000159721	-0.0129955	0.0465253	-0.011691	-0.00654026
		PZH12-15 23	0.000360442	3.09574	2.90447	29.9726	2.28606	2.27908	0.787084	1.77611e-05	1.06585	2.32441e-05	10.3195	0.000176268	-0.0460824	0.0451292	0.018849	-0.0286062
	Grain 5	PZH12-15 24	0.000619094	3.04653	2.85839	29.4982	2.24996	2.24296	0.78714	1.89292e-05	1.06582	2.22746e-05	10.3199	0.000148852	0.0254129	0.0480973	-0.0361626	-0.000550841
		PZH12-15 25	0.000383492	3.12591	2.93274	30.2666	2.30852	2.30137	0.787156	2.08312e-05	1.06587	2.70731e-05	10.3203	0.000183032	0.0269228	0.0529293	0.0133937	0.0366236
		PZH12-15 26	0.000653092	3.09468	2.9034	29.9628	2.28535	2.27836	0.787129	1.85949e-05	1.06589	2.87795e-05	10.3199	0.000168369	-0.0727533	0.0472439	0.0443673	-0.0491445
	Grain 6	PZH12-15 27	0.000332891	3.03225	2.84503	29.3623	2.23965	2.23276	0.787217	2.15037e-05	1.06581	2.48601e-05	10.3206	0.000176919
2022-02-22	Grian 1	PZH12-15_01	-1.2838e-05	3.79884	3.57728	37.0422	2.83559	2.84031	0.792665	1.27711e-05	1.06193	1.98781e-05	10.3548	0.000142502
		PZH12-15_02	1.0804e-05	4.03641	3.80099	39.3593	3.01302	3.01774	0.792692	1.37344e-05	1.06194	1.64992e-05	10.355	0.000132129	0.0558261	0.0346545	0.00367568	0.0192066
		PZH12-15_03	-1.40577e-05	3.89381	3.66673	37.9682	2.90637	2.9109	0.79263	1.50177e-05	1.06193	1.87863e-05	10.3548	0.000139117	-0.0278155	0.0378922	-0.0189701	-0.00498701
		PZH12-15_04	2.16429e-05	3.86602	3.64044	37.6956	2.88547	2.89	0.792613	1.42878e-05	1.06196	1.77976e-05	10.3547	0.000137551	0.0164453	0.0360531	-0.0234743	0.00780676
		PZH12-15_05	4.77734e-08	3.85645	3.63114	37.5982	2.87793	2.88222	0.792569	1.51605e-05	1.06205	1.79766e-05	10.3544	0.000148713	-0.0196944	0.0382559	0.0377194	-0.0183843
		PZH12-15_06	2.88532e-05	3.84846	3.62361	37.5206	2.87192	2.87633	0.792557	1.54488e-05	1.06205	1.71104e-05	10.3545	0.000138328	-0.00840126	0.0389843	0.0184414	0.00984587
		PZH12-15_07	1.44183e-05	3.7418	3.52329	36.4814	2.79241	2.79654	0.792557	1.57301e-05	1.06202	1.64713e-05	10.3544	0.000137169	0.0329625	0.0396959	-0.041354	0.01142
		PZH12-15_08	-1.48163e-05	3.74189	3.5232	36.4793	2.79216	2.7962	0.792506	1.68741e-05	1.06207	1.97178e-05	10.354	0.000158427	-0.0348163	0.0425827	0.020269	-0.021326
		PZH12-15_09	-5.14094e-07	3.78548	3.56421	36.9042	2.82467	2.82873	0.79251	1.62981e-05	1.06208	1.93702e-05	10.3541	0.000154153	0.00536134	0.0411305	0.0142117	0.00747553
		PZH12-15_10	1.32861e-05	3.63423	3.42185	35.43	2.71183	2.71583	0.792505	1.44259e-05	1.06206	1.94395e-05	10.3541	0.000149918	-0.00888292	0.0364054	-0.00528213	0.0082147
		PZH12-15_11	8.34667e-06	3.6606	3.44672	35.6868	2.73158	2.7355	0.792514	1.39383e-05	1.06205	1.86727e-05	10.3538	0.000136922	0.0269548	0.0351758	-0.0235396	0.00812622
	Grian 2	PZH12-15_12	1.12375e-05	3.63187	3.41955	35.404	2.70992	2.71362	0.792481	1.61083e-05	1.06209	1.88235e-05	10.3534	0.000288608	0.00486538	0.0406532	0.01445	-0.0228624
		PZH12-15_13	-9.71199e-07	3.66683	3.45242	35.7447	2.73583	2.73955	0.79244	1.83664e-05	1.0621	1.88377e-05	10.3535	0.000154646	-0.0510879	0.0463517	-0.000314504	-0.0264586
		PZH12-15_14	1.41968e-06	3.80842	3.58568	37.1267	2.84157	2.84548	0.79248	1.36428e-05	1.06211	1.68815e-05	10.3541	0.000145627	0.0490163	0.0344324	-0.00379206	0.0602191
		PZH12-15_15	-3.01543e-07	3.66595	3.4515	35.7351	2.73511	2.73877	0.792442	1.44982e-05	1.06213	1.81518e-05	10.3535	0.000139119	0.00838486	0.0365916	-0.0220793	-0.0217545
		PZH12-15_16	1.0977e-05	3.65354	3.4396	35.6114	2.7255	2.72901	0.792391	1.60312e-05	1.0622	1.65964e-05	10.3534	0.000141229	-0.0206377	0.0404619	0.053425	0.108721
		PZH12-15_17	-1.60727e-05	3.57105	3.36209	34.8004	2.66402	2.66765	0.792372	1.65401e-05	1.06215	2.08024e-05	10.3509	0.00174547	0.0124343	0.0417488	-0.0473961	-0.21634
		PZH12-15_18	6.60358e-06	3.71206	3.49467	36.1803	2.76894	2.77246	0.792334	1.6021e-05	1.0622	2.06754e-05	10.353	0.00016799	-0.0337485	0.0404387	0.0387171	0.147105
		PZH12-15_19	1.02178e-05	3.6859	3.47014	35.9227	2.74955	2.7529	0.79235	1.65612e-05	1.06217	1.95706e-05	10.352	0.000671153	0.0205197	0.0418037	-0.0296758	-0.0875877
		PZH12-15_20	-1.16431e-06	3.62907	3.41653	35.3707	2.70701	2.7104	0.792333	1.76225e-05	1.06221	1.90598e-05	10.3528	0.000161512	-0.00924446	0.0444822	0.0283344	0.0476483
		PZH12-15_21	-5.21606e-06	3.63886	3.42583	35.4665	2.71439	2.71769	0.79233	1.52032e-05	1.06218	1.85173e-05	10.3527	0.000132302	0.0931243	0.0383795	-0.039144	0.0337213
		PZH12-15_22	6.98954e-06	3.72594	3.50763	36.3103	2.77867	2.78188	0.79218	1.73451e-05	1.06224	1.94577e-05	10.3518	0.000168603	-0.113048	0.043786	0.0311764	-0.0436103
		PZH12-15_23	8.17175e-06	3.57655	3.36702	34.8549	2.66738	2.67053	0.792209	1.68177e-05	1.06223	1.77127e-05	10.3519	0.000206486	0.0185382	0.0424585	-0.0436011	-0.00908293
		PZH12-15_24	-2.16672e-05	3.61542	3.40335	35.2318	2.69616	2.69932	0.792209	1.39042e-05	1.06231	1.93678e-05	10.3521	0.000150692	0.0237277	0.0351032	0.0434515	0.0228847
		PZH12-15_25	1.42677e-06	3.64247	3.42884	35.4949	2.71622	2.71934	0.792171	1.71908e-05	1.0623	1.7018e-05	10.3519	0.000153483	0.019411	0.0434027	-0.0180008	0.00637813
		PZH12-15_26	6.33571e-06	3.60963	3.39783	35.1726	2.69142	2.69442	0.792102	1.62093e-05	1.06233	2.08557e-05	10.3515	0.000156143	-0.0801754	0.040924	0.0406974	-0.0317481
		PZH12-15_27	6.81145e-06	3.52036	3.31397	34.3055	2.6252	2.62821	0.792161	1.36995e-05	1.06228	1.97028e-05	10.3518	0.000158408
2022-02-23	Grian 1	PZH12-15_01	3.11417e-08	3.27254	3.08192	31.9169	2.44344	2.44812	0.79283	1.36702e-05	1.06185	1.71908e-05	10.3562	0.000139727
		PZH12-15_02	1.67636e-05	3.24431	3.05522	31.6396	2.42223	2.42667	0.79282	1.59965e-05	1.06189	1.68764e-05	10.3559	0.000141008	0.0714428	0.0403563	0.00870241	0.02833
		PZH12-15_03	6.06639e-06	3.18682	3.001	31.0756	2.37888	2.38317	0.792697	1.66648e-05	1.06192	1.84839e-05	10.3551	0.000147551	-0.0612931	0.0420432	-0.00241836	-0.0210816
		PZH12-15_04	3.09705e-05	3.18304	2.99736	31.0368	2.37592	2.38009	0.79267	1.38414e-05	1.06195	1.82065e-05	10.3547	0.000140396	0.0308173	0.0349245	-0.00910564	-0.0127921
		PZH12-15_05	3.71148e-06	3.19593	3.00935	31.1607	2.3852	2.38926	0.792595	1.31241e-05	1.062	1.6629e-05	10.3546	0.000131287	-0.0691804	0.0331145	0.0359045	-0.00666228
		PZH12-15_06	4.28695e-07	3.19654	3.01001	31.1675	2.38582	2.38981	0.79263	1.40564e-05	1.06197	1.82657e-05	10.3546	0.000124335	0.062907	0.03547	-0.0348267	0.0138827
		PZH12-15_07	1.48925e-05	3.18243	2.99659	31.0277	2.37499	2.3788	0.792565	1.68323e-05	1.06202	2.01556e-05	10.3544	0.000154888	-0.02422	0.0424745	0.0280926	0.00851421
		PZH12-15_08	6.88545e-06	3.16196	2.97735	30.8272	2.35966	2.36341	0.792538	1.34418e-05	1.062	1.87142e-05	10.3539	0.000139993	0.00551651	0.033921	-0.0291889	-0.0101837
		PZH12-15_09	-1.01347e-05	3.10599	2.92452	30.2795	2.31768	2.32125	0.792503	1.53887e-05	1.06205	1.7827e-05	10.3537	0.00014143	0.0210618	0.0388365	0.0177216	0.0111195
		PZH12-15_10	1.16614e-05	3.11028	2.92852	30.3196	2.32066	2.32414	0.792434	1.52338e-05	1.06207	1.70605e-05	10.3532	0.000148772	-0.0333198	0.0384469	-0.0407055	-0.033753
		PZH12-15_11	-1.5012e-06	3.12319	2.94041	30.4433	2.33003	2.33343	0.792418	1.40499e-05	1.06216	1.94474e-05	10.3534	0.000148356	0.079914	0.0354636	0.0362979	0.0649947
		PZH12-15_12	-1.77461e-06	3.0372	2.85939	29.6014	2.26542	2.26867	0.792276	1.41965e-05	1.06218	1.8416e-05	10.3523	0.000145839	-0.0785393	0.0358345	0.00705689	-0.0457243
		PZH12-15_13	-6.5974e-06	3.04016	2.86216	29.6296	2.26757	2.27056	0.792257	1.56657e-05	1.06219	2.08611e-05	10.3522	0.000138257	0.0327067	0.0395482	-0.0298567	0.0166916
	Grain 2	PZH12-15_14	4.17017e-06	2.99687	2.82122	29.2044	2.23494	2.23789	0.792187	1.53695e-05	1.06226	1.9678e-05	10.3517	0.000154108	-0.0225441	0.0388019	0.0303209	-0.0169949
		PZH12-15_15	7.55228e-06	2.81787	2.6527	27.4594	2.10134	2.1042	0.792153	1.60031e-05	1.06227	1.96182e-05	10.3515	0.000142592	0.0110536	0.0404046	-0.00539837	0.00032697
		PZH12-15_16	1.78386e-05	2.77028	2.60785	26.9948	2.06568	2.06848	0.792101	1.60356e-05	1.06228	2.10437e-05	10.3513	0.000157978	-0.0508878	0.0404867	-0.0151167	-0.00977644
		PZH12-15_17	2.0832e-05	2.81313	2.64807	27.4112	2.09762	2.1004	0.79213	1.46257e-05	1.06233	1.78062e-05	10.3514	0.000140327	0.0810135	0.0369306	0.00310486	0.039772
		PZH12-15_18	-1.00155e-05	2.77241	2.60964	27.0114	2.06691	2.06954	0.792031	1.50064e-05	1.06237	2.0265e-05	10.3506	0.000134478	-0.0385058	0.0378919	-0.00250686	-0.0376065
		PZH12-15_19	3.79589e-06	2.74438	2.58314	26.737	2.04582	2.0482	0.791992	1.50327e-05	1.06242	1.93664e-05	10.3506	0.000134909	0.0077987	0.0379621	0.0103404	0.0107723
		PZH12-15_20	5.13057e-06	2.75497	2.59304	26.8389	2.05354	2.05608	0.791941	1.5451e-05	1.06245	1.63483e-05	10.3504	0.000129522	0.00328931	0.0390208	0.0106591	0.0199583
		PZH12-15_21	-1.17216e-05	2.75669	2.59466	26.854	2.05467	2.05702	0.791885	1.425e-05	1.06245	1.79472e-05	10.3497	0.000133882
2022-02-24	Grian 1	PZH12-15_01	4.41467e-06	3.58653	3.37556	34.935	2.67281	2.67672	0.791811	1.50092e-05	1.0625	1.7709e-05	10.3494	0.000160082
	Grian 2	PZH12-15_02	-6.32646e-06	3.58329	3.37251	34.9068	2.67083	2.67516	0.79194	1.6096e-05	1.0625	1.7373e-05	10.3504	0.000148783	0.110602	0.0406541	0.0153898	0.0791776
	Grian 3	PZH12-15_03	-1.64159e-06	3.70635	3.48844	36.1045	2.76248	2.76684	0.791893	1.45541e-05	1.06247	1.90183e-05	10.3497	0.00020193	0.00887205	0.0367581	-0.0411251	-0.0128606
	Grian 4	PZH12-15_04	7.94116e-06	3.58286	3.37204	34.8986	2.67011	2.67467	0.791833	1.65514e-05	1.06252	1.74292e-05	10.3494	0.000146859	-0.052261	0.041803	0.0333094	-0.0364944
	Grian 5	PZH12-15_05	-2.17164e-06	3.42894	3.22722	33.401	2.5555	2.56053	0.791855	1.50289e-05	1.06251	1.83474e-05	10.3497	0.0001483	-0.0127349	0.0379583	0.012065	0.00713121
	Grian 6	PZH12-15_06	-1.832e-05	3.84188	3.61601	37.4256	2.86351	2.86872	0.791898	1.42059e-05	1.06246	1.74881e-05	10.35	0.000125424	0.0188044	0.0358788	-0.030412	0.00500811
	Grian 7	PZH12-15_07	1.23036e-05	3.93342	3.70209	38.317	2.93172	2.93735	0.79191	1.4095e-05	1.06249	1.60952e-05	10.3501	0.000119786	-0.0158428	0.0355969	0.0326005	-0.00338676
	Grian 8	PZH12-15_08	-9.15862e-06	3.98432	3.75017	38.8153	2.96994	2.97587	0.791948	1.43937e-05	1.06244	1.83762e-05	10.3503	0.000128297	0.0866131	0.0363532	-0.0525575	0.04141
	Grian 9	PZH12-15_09	5.56792e-06	3.74642	3.52602	36.493	2.79208	2.79824	0.791849	1.61191e-05	1.06251	1.66434e-05	10.3496	0.000144694	-0.0355923	0.0407111	0.0319682	-0.0147614
	Grian 10	PZH12-15_10	6.89763e-06	3.86248	3.63526	37.6223	2.87842	2.88452	0.791806	1.48583e-05	1.0625	1.51935e-05	10.3493	0.000117541	-0.0611953	0.0375279	-0.0203675	-0.0374717
	Grian 11	PZH12-15_11	1.06689e-05	3.96419	3.73085	38.6132	2.95432	2.96065	0.79186	1.28621e-05	1.06254	1.43988e-05	10.3497	0.000127545	0.0213358	0.0324865	0.0314968	0.0193321
	Grian 12	PZH12-15_12	-1.21761e-05	3.71677	3.49808	36.2041	2.77006	2.77669	0.79188	1.22989e-05	1.06252	1.50025e-05	10.3497	0.000122911	-0.000259689	0.0310627	-0.0125221	-0.0129369
	Grian 13	PZH12-15_13	1.10145e-05	3.78889	3.56595	36.9075	2.82387	2.83066	0.7919	1.55219e-05	1.06252	1.87695e-05	10.35	0.000142029	0.0518645	0.0392036	-0.0154046	0.0241316
	Grian 14	PZH12-15_14	3.46298e-06	3.73829	3.51822	36.4128	2.78586	2.79297	0.791838	1.24531e-05	1.06255	1.75214e-05	10.3498	0.000118277	0.0174964	0.0314541	-0.00239216	0.0207501
	Grian 15	PZH12-15_15	1.84937e-07	3.71157	3.49295	36.149	2.76554	2.77265	0.791749	1.30422e-05	1.06259	1.56013e-05	10.3491	0.000123273	-0.101959	0.0329419	0.0252888	-0.0450283
	Grian 16	PZH12-15_16	1.97875e-05	3.74049	3.52021	36.4322	2.78738	2.79449	0.791821	1.43969e-05	1.06257	1.64065e-05	10.3494	0.00012909	0.0855651	0.0363672	-0.0051988	0.0306493
	Grian 17	PZH12-15_17	9.67069e-06	4.01705	3.7805	39.1248	2.99325	3.00047	0.791758	1.52293e-05	1.06257	1.57228e-05	10.3491	0.000139898	-0.0804527	0.0384665	0.0018543	-0.034763
	Grian 18	PZH12-15_18	1.93147e-05	3.62821	3.41458	35.3391	2.70374	2.71131	0.791822	1.43471e-05	1.06256	1.68932e-05	10.3494	0.000113627	-0.0156357	0.0362376	0.023823	-0.00686627
	Grian 19	PZH12-15_19	7.75179e-06	3.66379	3.44826	35.6894	2.73072	2.73837	0.791911	1.17882e-05	1.0625	1.46227e-05	10.35	0.000117182	0.101813	0.0297745	-0.0382941	0.0438195
	Grian 20	PZH12-15_20	1.00707e-05	3.77093	3.54902	36.7309	2.81025	2.81795	0.791838	1.34045e-05	1.06252	1.66229e-05	10.3496	0.000135524	0.015288	0.0338572	-0.0323125	-0.00128981
	Grian 21	PZH12-15_21	6.73836e-06	3.79888	3.57502	36.9987	2.83049	2.83834	0.791742	1.45253e-05	1.06262	1.6607e-05	10.3492	0.000127033

[truncated: 2 more sheets: PZH12-18, BDL-1]
